# Supplementary material for: A stereodivergent multicomponent approach for the synthesis of C–N atropisomeric peptide analogues
Source: Royal Society of Chemistry journal article supplement (doi:10.1039/d4sc04700a), 2024-01-01

## Contents

|           |                                                                      |            |
|-----------|----------------------------------------------------------------------|------------|
| <b>1.</b> | <b>General Information</b>                                           | <b>S2</b>  |
| <b>2.</b> | <b>General Procedures</b>                                            | <b>S3</b>  |
| <b>3.</b> | <b>Experimental Procedures</b>                                       | <b>S4</b>  |
| 3.1.      | <i>Synthesis of anti-configured peptide analogues</i>                | <b>S4</b>  |
| 3.2.      | <i>Mechanistic experiments and configurational stability studies</i> | <b>S47</b> |
| 3.3.      | <i>Synthesis of syn-configured peptide analogues</i>                 | <b>S61</b> |
| <b>4.</b> | <b>X-ray Crystallography</b>                                         | <b>S71</b> |
| <b>5.</b> | <b>Computational Modelling</b>                                       | <b>S72</b> |
| 5.1.      | <i>Computational methods</i>                                         | <b>S72</b> |
| 5.2.      | <i>Summary of the associated computational dataset contents</i>      | <b>S72</b> |
| <b>6.</b> | <b>M. tuberculosis inhibition</b>                                    | <b>S77</b> |
| 6.1       | <i>Results</i>                                                       | <b>S77</b> |
| 6.2       | <i>Materials and methods</i>                                         | <b>S77</b> |
| <b>7.</b> | <b>References</b>                                                    | <b>S81</b> |
| <b>8.</b> | <b>NMR spectra</b>                                                   | <b>S82</b> |

## 1. General Information

Reactions were carried out under an atmosphere of nitrogen. Room temperature (RT) refers to 20-25 °C. Temperatures of 0 °C were obtained using an ice/water bath. Reactions at elevated temperature were performed using an oil bath equipped with a contact thermometer.

All solvents (including anhydrous solvents) were used as supplied without prior purification. All other reagents were used directly as supplied by major chemical suppliers, or following purification procedures described by Perrin and Armarego.<sup>[1]</sup>

Thin layer chromatography was performed on Merck Kieselgel 60 F<sub>254</sub> 0.25 mm pre-coated aluminium plates. Product spots were visualized under UV light ( $\lambda = 254$  nm) and/or by staining with potassium permanganate solution. Flash chromatography was performed using VWR silica gel 60 (40-63  $\mu\text{m}$  particle size) using head pressure by means of a nitrogen line.

NMR spectroscopy was carried out using Bruker 300 MHz, 400 MHz, 500 MHz, Cryo 700 MHz spectrometers in the deuterated solvent stated, using the residual non-deuterated solvent signal as an internal reference. Chemical shifts are quoted in ppm with signal splitting recorded as singlet (s), doublet (d), triplet (t), quartet (q), quintet (qn), sextet (sext), septet (sept), octet (oct), nonet (non) and multiplet (m). The abbreviation br denotes broad. Coupling constants,  $J$ , are measured to the nearest 0.1 Hz and are presented as observed.

Infrared spectra were recorded on a PerkinElmer UATR Two spectrometer with attenuated total reflectance. Absorption maxima ( $\lambda_{\text{max}}$ ) are reported in wavenumbers ( $\text{cm}^{-1}$ ).

HRMS was recorded on a Waters Xevo G2-XS Quadrupole Time-of-Flight (QToF) spectrometer equipped with a Waters Acquity UPLC i-Class LC system, under conditions of electrospray ionisation (ESI). The mass reported is that containing the most abundant isotopes, with each value rounded to 4 decimal places and within 10 ppm of the calculated mass.

Normal phase chiral HPLC was performed on a Dionex Ultimate 3000 HPLC unit equipped with UV-vis diode-array detector, fitted with the appropriate DAICEL column (dimensions: 0.46 cm  $\varnothing$  x 25 cm) along with the corresponding guard column (0.4 cm  $\varnothing$  x 1 cm). Wavelengths ( $\lambda$ ) are reported in nm, retention times ( $t_{\text{R}}$ ) are reported in minutes and solvent flow rates are reported in  $\text{mL min}^{-1}$ .

## 2. *General Procedures*

### **General Procedure A: Four-component coupling reactions at room temperature**

A round bottomed flask equipped with a stirrer bar, was sequentially charged with the appropriate aniline (1.0 equiv.), the appropriate carboxylic acid (1.0 equiv.), the appropriate aldehyde (1.0 equiv.), 2,2,2-trifluoroethanol (2 mL/mmol aniline) and the appropriate isocyanide (1.0 equiv.). The resulting mixture was stirred at room temperature for 24 hours. The reaction mixture was concentrated to dryness, followed by addition of addition of EtOAc and saturated aqueous Na<sub>2</sub>CO<sub>3</sub>. The layers were separated, and the aqueous layer was extracted twice with EtOAc. The combined organic extracts were dried over MgSO<sub>4</sub>, filtered and the resulting solution was concentrated and purified by column chromatography (see experimental methods section for details).

### **General Procedure B: Four-component coupling reactions at elevated temperature**

An Ace pressure tube (capacity ~15 mL, L × O.D. 10.2 cm × 25.4 mm) equipped with a stirrer bar, was sequentially charged with the appropriate aniline (1.0 equiv.), the appropriate carboxylic acid (1.0 equiv.), the appropriate aldehyde (1.0 equiv.), 2,2,2-trifluoroethanol (2 mL/mmol aniline) and the appropriate isocyanide (1.0 equiv.). The tube was sealed, and the resulting mixture was stirred at room temperature for 16 hours and then heated to 110 °C in a preheated oil bath for a further 24 h. The resulting solution was cooled to room temperature and concentrated to dryness, followed by addition of EtOAc and saturated aqueous Na<sub>2</sub>CO<sub>3</sub>. The layers were separated, and the aqueous layer was extracted twice with EtOAc. The combined organic extracts were dried over MgSO<sub>4</sub>, filtered and the resulting solution was concentrated and purified by column chromatography (see experimental methods section for details).

### 3. Experimental Procedures

#### 3.1. Synthesis of anti-configured peptide analogues

*rac*-(*R<sub>a</sub>*,*R*)-*N*-(2-(*tert*-Butyl)phenyl)-*N*-(2-(*tert*-butylamino)-2-oxo-1-phenylethyl)benzamide, *anti*-**1a**

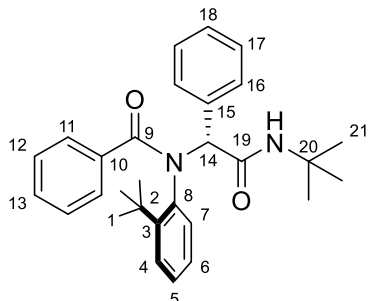

1.20 mmol scale reaction: 2-*tert*-Butylaniline (180 mg, 1.20 mmol, 1.0 eq.), benzoic acid (147 mg, 1.20 mmol, 1.0 eq.), benzaldehyde (122  $\mu$ L, 1.20 mmol, 1.0 eq.), 2,2,2-trifluoroethanol (2.4 ml, 0.5 M) and *tert*-butyl isocyanide (136  $\mu$ L, 1.20 mmol, 1.0 eq.) were subjected to **General Procedure A**. [N.B. in this case, the crude residue obtained upon removal of 2,2,2-trifluoroethanol was directly purified via column chromatography without an aqueous workup]. Purification *via* column chromatography eluting with petrol 40-60/EtOAc 90:10 afforded the title compound *anti*-**1a** as a pale-yellow solid (491 mg, 92% yield, >95:5 d.r.).

4.00 mmol scale reaction: 2-*tert*-Butylaniline (597 mg, 4.00 mmol, 1.0 eq.), benzoic acid (489 mg, 4.00 mmol, 1.0 eq.), benzaldehyde (0.41 mL, 4.00 mmol, 1.0 eq.), 2,2,2-trifluoroethanol (8.0 ml, 0.5 M) and *tert*-butyl isocyanide (0.45 mL, 4.00 mmol, 1.0 eq.) were subjected to **General Procedure A**. [N.B. in this case, the crude residue obtained upon removal of 2,2,2-trifluoroethanol was directly purified *via* column chromatography without an aqueous workup]. Purification *via* column chromatography eluting with petrol 40-60/Et<sub>2</sub>O 90:10 afforded the title compound *anti*-**1a** as a pale-yellow solid (1.52 g, 86% yield).

**<sup>1</sup>H NMR (300 MHz, CDCl<sub>3</sub>):**  $\delta_{\text{H}}$  7.93 – 7.88 (m, 1H, H<sub>7</sub>), 7.78 – 7.65 (m, 2H, H<sub>16</sub>), 7.46 – 7.36 (m, 3H, H<sub>17</sub> and H<sub>18</sub>), 7.33 – 7.14 (m, 6H, H<sub>4</sub>, H<sub>5</sub>, H<sub>6</sub>, H<sub>11</sub> and H<sub>13</sub>), 7.13 – 7.04 (m, 2H, H<sub>12</sub>), 5.69 (s, 1H, NH), 5.43 (s, 1H, H<sub>14</sub>), 1.30 (s, 9H, H<sub>21</sub>), 0.83 (s, 9H, H<sub>1</sub>).

**<sup>13</sup>C NMR (75 MHz, CDCl<sub>3</sub>):**  $\delta_{\text{C}}$  170.5, 167.9, 146.8, 141.3, 136.7, 136.5, 132.3, 130.8, 130.7, 129.8, 129.6, 129.1, 128.9, 128.0, 127.4, 126.8, 74.3, 51.7, 36.2, 32.2, 28.7.

**FTIR (cm<sup>-1</sup>):** 3305, 3071, 2958, 1686, 1615, 1551, 1361, 760, 699, 641.

**Melting Point (°C):** 170 – 172.

**HRMS (ESI):** Exact mass calculated for C<sub>29</sub>H<sub>35</sub>N<sub>2</sub>O<sub>2</sub><sup>+</sup> [M+H]<sup>+</sup>: 443.2693, found: 443.2700.  $\Delta$  = 1.6 ppm.



***rac*-(*R,R*)-N-(2-(*tert*-butyl)phenyl)-N-(2-(*tert*-butylamino)-1-(4-methoxyphenyl)-2-oxoethyl)benzamide, *anti*-1c**

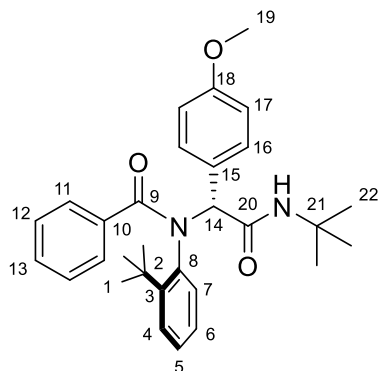

2-*tert*-Butylaniline (180 mg, 1.20 mmol, 1.0 eq.), benzoic acid (147 mg, 1.20 mmol, 1.0 eq.), 4-methoxybenzaldehyde (146  $\mu$ L, 1.20 mmol, 1.0 eq.), 2,2,2-trifluoroethanol (2.4 ml, 0.5 M) and *tert*-butyl isocyanide (136  $\mu$ L, 1.20 mmol, 1.0 eq.) were subjected to **General Procedure A**. Purification *via* column chromatography eluting with petrol 40-60/Et<sub>2</sub>O 70:30 afforded the title compound ***anti*-1c** as a white solid (469 mg, 83% yield, >95:5 d.r.).

**<sup>1</sup>H NMR (300 MHz, CDCl<sub>3</sub>):**  $\delta_{\text{H}}$  7.95 (d, *J* = 7.9 Hz, 1H, H<sub>7</sub>), 7.65 (d, *J* = 8.7 Hz, 2H, H<sub>16</sub>), 7.31 – 7.13 (m, 6H, H<sub>4</sub>, H<sub>5</sub>, H<sub>6</sub>, H<sub>11</sub> and H<sub>13</sub>), 7.07 (dd, *J* = 8.1, 6.5 Hz, 2H, H<sub>12</sub>), 6.92 (d, *J* = 8.7 Hz, 2H, H<sub>17</sub>), 5.69 (s, 1H, NH), 5.31 (s, 1H, H<sub>14</sub>), 3.85 (s, 3H, H<sub>19</sub>), 1.31 (s, 9H, H<sub>22</sub>), 0.80 (s, 9H, H<sub>1</sub>).

**<sup>13</sup>C NMR (75 MHz, CDCl<sub>3</sub>):**  $\delta_{\text{C}}$  170.4, 168.3, 159.9, 146.7, 141.5, 136.6, 132.5, 132.3, 130.6, 129.8, 129.5, 128.7, 127.8, 127.3, 126.9, 114.3, 74.0, 55.4, 51.7, 36.2, 32.2, 28.8.

**FTIR (cm<sup>-1</sup>):** 3313, 2964, 2909, 1688, 1613, 1549, 1509, 1358, 1251, 758, 715, 628.

**Melting Point (°C):** 154 – 155.

**HRMS (ESI):** Exact mass calculated for C<sub>30</sub>H<sub>37</sub>N<sub>2</sub>O<sub>3</sub><sup>+</sup> [M+H]<sup>+</sup>: 473.2799, found: 473.2818.  $\Delta$  = 4.0 ppm.



***rac*-(*R*,*R*)-*N*-(2-(*tert*-butyl)phenyl)-*N*-(2-(*tert*-butylamino)-1-(4-fluorophenyl)-2-oxoethyl)benzamide, *anti*-1e**

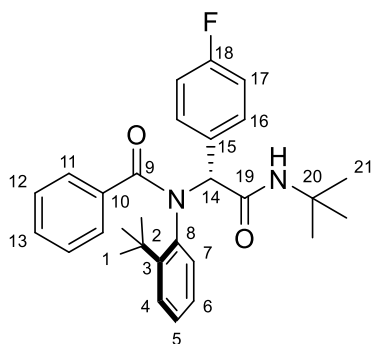

2-*tert*-Butylaniline (180 mg, 1.20 mmol, 1.0 eq.), benzoic acid (147 mg, 1.20 mmol, 1.0 eq.), 4-fluorobenzaldehyde (129  $\mu$ L, 1.20 mmol, 1.0 eq.), 2,2,2-trifluoroethanol (2.4 ml, 0.5 M) and *tert*-butyl isocyanide (136  $\mu$ L, 1.20 mmol, 1.0 eq.) were subjected to **General Procedure A**. [N.B. in this case, the crude residue obtained upon removal of 2,2,2-trifluoroethanol was directly purified via column chromatography without an aqueous workup]. Purification *via* column chromatography eluting with petrol 40-60/EtOAc 90:10 afforded the title compound *anti*-1e as a white solid (455 mg, 82% yield, >95:5 d.r.).

**$^1\text{H NMR}$  (300 MHz,  $\text{CDCl}_3$ ):**  $\delta_{\text{H}}$  7.86 (dd,  $J = 7.2, 2.2$  Hz, 1H,  $\text{H}_7$ ), 7.76 – 7.67 (m, 2H,  $\text{H}_{16}$ ), 7.31 – 7.15 (m, 6H,  $\text{H}_4, \text{H}_5, \text{H}_6, \text{H}_{13}$  and  $\text{H}_{11}$ ), 7.14 – 7.05 (m, 4H,  $\text{H}_{12}$  and  $\text{H}_{17}$ ), 5.67 (s, 1H, NH), 5.41 (s, 1H,  $\text{H}_{14}$ ), 1.31 (s, 9H,  $\text{H}_{21}$ ), 0.83 (s, 9H,  $\text{H}_1$ ).

**$^{13}\text{C NMR}$  (75 MHz,  $\text{CDCl}_3$ ):**  $\delta_{\text{C}}$  170.7, 167.7, 163.0 (d,  $J = 248.5$  Hz) 146.8, 141.2, 136.4, 132.9 (d,  $J = 8.0$  Hz), 132.6 (d,  $J = 3.4$  Hz), 132.3, 130.8, 129.8, 129.7, 128.1, 127.4, 126.9, 116.0 (d,  $J = 21.3$  Hz), 73.5, 51.8, 36.2, 32.2, 28.8.

**$^{19}\text{F NMR}$  (282 MHz,  $\text{CDCl}_3$ ):**  $\delta_{\text{F}}$  –112.5 – –112.7 (m).

**FTIR ( $\text{cm}^{-1}$ ):** 3312, 2972, 1687, 1635, 1614, 1549, 1359, 1221, 762, 710, 694, 626.

**Melting Point ( $^{\circ}\text{C}$ ):** 161 – 162.

**HRMS (ESI):** Exact mass calculated for  $\text{C}_{29}\text{H}_{34}\text{FN}_2\text{O}_2^+$   $[\text{M}+\text{H}]^+$ : 461.2599, found: 461.2619.  $\Delta = 4.3$  ppm.



***rac-(R<sub>a</sub>,R)*-N-(2-(*tert*-butyl)phenyl)-N-(2-(*tert*-butylamino)-2-oxo-1-(*m*-tolyl)ethyl)benzamide,  
*anti*-1f**

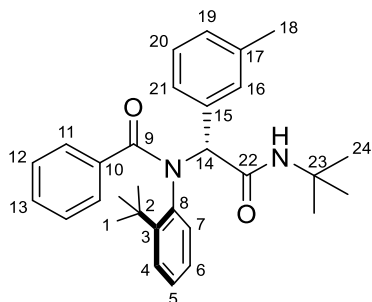

2-*tert*-Butylaniline (180 mg, 1.20 mmol, 1.0 eq.), benzoic acid (147 mg, 1.20 mmol, 1.0 eq.), 3-methyl benzaldehyde (141  $\mu$ L, 1.20 mmol, 1.0 eq.), 2,2,2-trifluoroethanol (2.4 ml, 0.5 M) and *tert*-butyl isocyanide (136  $\mu$ L, 1.20 mmol, 1.0 eq.) were subjected to **General Procedure A**. Purification *via* column chromatography eluting with petrol 40-60/Et<sub>2</sub>O 85:15 afforded the title compound *anti*-1f as a white solid (459 mg, 84% yield, >95:5 d.r.).

**<sup>1</sup>H NMR (300 MHz, CDCl<sub>3</sub>):**  $\delta_{\text{H}}$  7.91 – 7.84 (m, 1H, H<sub>7</sub>), 7.58 (dt,  $J = 7.7, 1.5$  Hz, 1H, H<sub>21</sub>), 7.41 (s, 1H, H<sub>16</sub>), 7.35 – 7.13 (m, 8H, H<sub>4</sub>, H<sub>5</sub>, H<sub>6</sub>, H<sub>11</sub>, H<sub>13</sub>, H<sub>19</sub> and H<sub>20</sub>), 7.12 – 7.04 (m, 2H, H<sub>12</sub>), 5.73 (s, 1H, NH), 5.40 (s, 1H, H<sub>14</sub>), 2.35 (s, 3H, H<sub>18</sub>), 1.29 (s, 9H, H<sub>24</sub>), 0.82 (s, 9H, H<sub>1</sub>).

**<sup>13</sup>C NMR (75 MHz, CDCl<sub>3</sub>):**  $\delta_{\text{C}}$  170.4, 168.0, 146.8, 141.3, 138.8, 136.6, 132.3, 131.5, 130.7, 129.8, 129.6, 129.6, 129.0, 127.9, 127.8, 127.3, 126.8, 74.1, 51.7, 36.3, 32.2, 28.7, 21.6. N.B. The peak at 136.6 ppm corresponds to two overlapping signals.

**FTIR (cm<sup>-1</sup>):** 3308, 2962, 1690, 1615, 1551, 1359, 761, 700, 648.

**Melting Point (°C):** 153 – 154.

**HRMS (ESI):** Exact mass calculated for C<sub>30</sub>H<sub>37</sub>N<sub>2</sub>O<sub>2</sub><sup>+</sup> [M+H]<sup>+</sup>: 457.2850, found: 457.2850.  $\Delta = 0.0$  ppm.

***rac*-(*R<sub>a</sub>,R*)-N-(2-(*tert*-butyl)phenyl)-N-(2-(*tert*-butylamino)-2-oxo-1-(3-(trifluoromethyl)phenyl)ethyl)benzamide, *anti*-1g**

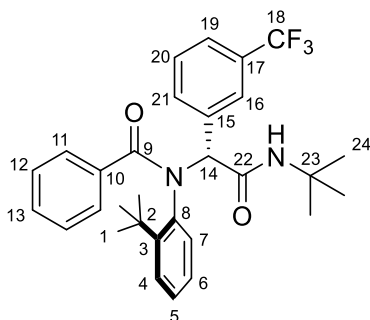

2-*tert*-Butylaniline (180 mg, 1.20 mmol, 1.0 eq.), benzoic acid (147 mg, 1.20 mmol, 1.0 eq.), 3-trifluoromethyl benzaldehyde (161  $\mu$ L, 1.20 mmol, 1.0 eq.), 2,2,2-trifluoroethanol (2.4 ml, 0.5 M) and *tert*-butyl isocyanide (136  $\mu$ L, 1.20 mmol, 1.0 eq.) were subjected to **General Procedure A**. Purification *via* column chromatography eluting with petrol 40-60/Et<sub>2</sub>O 90:10 afforded the title compound *anti*-**1g** as a white solid (455 mg, 74% yield, >95:5 d.r.).

**<sup>1</sup>H NMR (300 MHz, CDCl<sub>3</sub>):**  $\delta$ <sub>H</sub> 8.02 (d, *J* = 7.6 Hz, 1H, H<sub>21</sub>), 7.85 (s, 1H, H<sub>16</sub>), 7.80 – 7.60 (m, 2H, H<sub>7</sub> and H<sub>19</sub>), 7.55 (t, *J* = 7.8 Hz, 1H, H<sub>20</sub>), 7.33 – 7.15 (m, 6H, H<sub>4</sub>, H<sub>5</sub>, H<sub>6</sub>, H<sub>11</sub> and H<sub>13</sub>), 7.13 – 7.05 (m, 2H, H<sub>12</sub>), 5.81 (s, 1H, NH), 5.57 (s, 1H, H<sub>14</sub>), 1.31 (s, 9H, H<sub>24</sub>), 0.85 (s, 9H, H<sub>1</sub>).

**<sup>13</sup>C NMR (101 MHz, CDCl<sub>3</sub>):**  $\delta$ <sub>C</sub> 171.0, 167.2, 146.8, 140.6, 137.7, 136.1, 134.0, 132.3, 131.3 (q, *J* = 32.4 Hz), 130.9, 129.9, 129.8, 129.5, 128.3, 127.7 (q, *J* = 3.9 Hz), 127.5, 126.9, 125.6 (q, *J* = 3.9 Hz), 124.0 (q, *J* = 272.4 Hz), 73.1, 52.0, 36.3, 32.2, 28.7.

**<sup>19</sup>F NMR (282 MHz, CDCl<sub>3</sub>):**  $\delta$ <sub>F</sub> –62.7 (s).

**FTIR (cm<sup>-1</sup>):** 3293, 2971, 1698, 1685, 1631, 1328, 1130, 1119, 714, 707.

**Melting Point (°C):** 143 – 144.

**HRMS (ESI):** Exact mass calculated for C<sub>30</sub>H<sub>34</sub>F<sub>3</sub>N<sub>2</sub>O<sub>2</sub><sup>+</sup> [M+H]<sup>+</sup>: 511.2567, found: 511.2567.  $\Delta$  = 0.0 ppm.

***rac*-(*R<sub>a</sub>*,*R*)-*N*-(2-(*tert*-butyl)phenyl)-*N*-(2-(*tert*-butylamino)-2-oxo-1-(3-(trifluoromethoxy)phenyl)ethyl)benzamide, *anti*-1h**

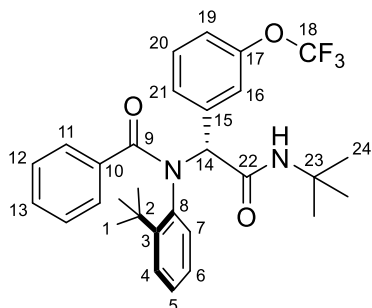

2-*tert*-Butylaniline (180 mg, 1.20 mmol, 1.0 eq.), benzoic acid (147 mg, 1.20 mmol, 1.0 eq.), 3-(trifluoromethoxy)benzaldehyde (172  $\mu$ L, 1.20 mmol, 1.0 eq.), 2,2,2-trifluoroethanol (2.4 ml, 0.5 M) and *tert*-butyl isocyanide (136  $\mu$ L, 1.20 mmol, 1.0 eq.) were subjected to **General Procedure A**. Purification *via* column chromatography eluting with petrol 40-60/Et<sub>2</sub>O 80:20 afforded the title compound *anti*-**1h** as a pale-yellow solid (482 mg, 76% yield, >95:5 d.r.).

**<sup>1</sup>H NMR (300 MHz, CDCl<sub>3</sub>):**  $\delta_{\text{H}}$  7.83 – 7.77 (m, 1H, H<sub>7</sub>), 7.74 (s, 1H, H<sub>16</sub>), 7.59 (d,  $J$  = 7.8 Hz, 1H, H<sub>21</sub>), 7.43 (t,  $J$  = 8.0 Hz, 1H, H<sub>20</sub>), 7.32 – 7.15 (m, 7H, H<sub>4</sub>, H<sub>5</sub>, H<sub>6</sub>, H<sub>11</sub>, H<sub>13</sub> and H<sub>19</sub>), 7.09 (t,  $J$  = 7.5 Hz, 2H, H<sub>12</sub>), 5.70 (s, 1H, NH), 5.46 (s, 1H, H<sub>14</sub>), 1.30 (s, 9H, H<sub>24</sub>), 0.84 (s, 9H, H<sub>1</sub>).

**<sup>13</sup>C NMR (75 MHz, CDCl<sub>3</sub>):**  $\delta_{\text{C}}$  170.8, 167.2, 149.7 (q,  $J$  = 1.7 Hz), 146.8, 140.9, 139.0, 136.2, 132.2, 130.8, 130.4, 129.9, 129.8, 129.3, 128.2, 127.5, 126.9, 123.7, 121.6, 120.6 (q,  $J$  = 258.1 Hz), 73.4, 52.0, 36.3, 32.2, 28.7.

**<sup>19</sup>F NMR (282 MHz, CDCl<sub>3</sub>):**  $\delta_{\text{F}}$  –57.8 (s).

**FTIR (cm<sup>-1</sup>):** 3308, 3068, 2971, 1692, 1613, 1360, 1257, 1212, 1166, 701.

**Melting Point (°C):** 148 – 150.

**HRMS (ESI):** Exact mass calculated for C<sub>30</sub>H<sub>34</sub>F<sub>3</sub>N<sub>2</sub>O<sub>3</sub><sup>+</sup> [M+H]<sup>+</sup>: 527.2516, found: 527.2531.  $\Delta$  = 2.8 ppm.

***rac-(R<sub>a</sub>,R)*-N-(2-(*tert*-butyl)phenyl)-N-(2-(*tert*-butylamino)-2-oxo-1-(*o*-tolyl)ethyl)benzamide, *anti*-1i**

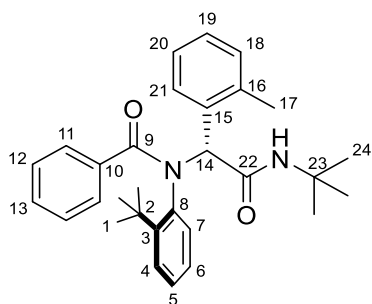

2-*tert*-Butylaniline (180 mg, 1.20 mmol, 1.0 eq.), benzoic acid (147 mg, 1.20 mmol, 1.0 eq.), 2-methyl benzaldehyde (139  $\mu$ L, 1.20 mmol, 1.0 eq.), 2,2,2-trifluoroethanol (2.4 ml, 0.5 M) and *tert*-butyl isocyanide (136  $\mu$ L, 1.20 mmol, 1.0 eq.) were subjected to **General Procedure A**. Purification *via* column chromatography eluting with petrol 40-60/Et<sub>2</sub>O 80:20 afforded the title compound *anti*-1i as a white solid (467 mg, 85% yield, >95:5 d.r.).

**<sup>1</sup>H NMR (300 MHz, CDCl<sub>3</sub>):**  $\delta$ <sub>H</sub> 8.12 (d, *J* = 7.6 Hz, 1H, H<sub>21</sub>), 7.93 (d, *J* = 7.1 Hz, 1H, H<sub>7</sub>), 7.39 – 7.15 (m, 9H, H<sub>4</sub>, H<sub>5</sub>, H<sub>6</sub>, H<sub>11</sub>, H<sub>13</sub>, H<sub>18</sub>, H<sub>19</sub>, H<sub>20</sub>), 7.14 – 7.07 (m, 2H, H<sub>12</sub>), 5.80 (s, 1H, H<sub>14</sub>), 5.45 (s, 1H, NH), 2.20 (s, 3H, H<sub>17</sub>), 1.15 (s, 9H, H<sub>24</sub>), 0.92 (s, 9H, H<sub>1</sub>).

**<sup>13</sup>C NMR (75 MHz, CDCl<sub>3</sub>):**  $\delta$ <sub>C</sub> 170.1, 167.4, 147.7, 140.6 (br), 137.4, 136.4, 135.3, 132.2, 131.2, 131.0, 129.9, 129.7, 129.0 (br), 128.5, 128.0, 127.4, 127.0, 126.4, 70.0, 51.5, 36.4, 32.0, 28.4, 20.0.

**FTIR (cm<sup>-1</sup>):** 3306, 2981, 3966, 2981, 2907, 1682, 1615, 1548, 1356, 762, 717.

**Melting Point (°C):** 195 – 196.

**HRMS (ESI):** Exact mass calculated for C<sub>30</sub>H<sub>37</sub>N<sub>2</sub>O<sub>2</sub><sup>+</sup> [M+H]<sup>+</sup>: 457.2850, found: 457.2850.  $\Delta$  = 0.0 ppm.

***rac*-(*R*,*R*)-*N*-(2-(*tert*-butyl)phenyl)-*N*-(2-(*tert*-butylamino)-1-(naphthalen-1-yl)-2-oxoethyl)benzamide, *anti*-1j**

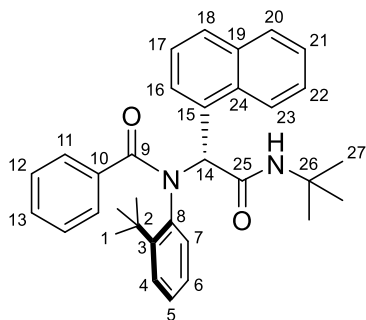

2-*tert*-Butylaniline (180 mg, 1.20 mmol, 1.0 eq.), benzoic acid (147 mg, 1.20 mmol, 1.0 eq.), 1-naphthaldehyde (163  $\mu$ L, 1.20 mmol, 1.0 eq.), 2,2,2-trifluoroethanol (2.4 ml, 0.5 M) and *tert*-butyl isocyanide (136  $\mu$ L, 1.20 mmol, 1.0 eq.) were subjected to **General Procedure A**. Purification *via* column chromatography eluting with petrol 40-60/Et<sub>2</sub>O 80:20 afforded the title compound *anti*-1j as a white solid (509 mg, 86% yield, >95:5 d.r.).

**<sup>1</sup>H NMR (300 MHz, CDCl<sub>3</sub>):**  $\delta_{\text{H}}$  8.25 (d,  $J = 7.3$  Hz, 1H, H<sub>Ar</sub>), 7.96 – 7.85 (m, 3H, H<sub>Ar</sub>), 7.72 (br s, 1H, H<sub>Ar</sub>), 7.62 – 7.42 (m, 3H, H<sub>Ar</sub>), 7.40 – 7.32 (m, 2H, H<sub>11</sub>), 7.31 – 7.17 (m, 4H, H<sub>Ar</sub>), 7.11 (m, 2H, H<sub>12</sub>), 6.61 (s, 1H, H<sub>14</sub>), 5.45 (s, 1H, NH), 1.04 (s, 9H, H<sub>27</sub>), 0.91 (s, 9H, H<sub>1</sub>).

**<sup>13</sup>C NMR (75 MHz, CDCl<sub>3</sub>):**  $\delta_{\text{C}}$  170.1, 167.3, 148.2, 139.4 (br), 136.3, 134.1, 132.3, 132.2, 132.1, 131.4, 130.1, 129.9, 129.4, 129.2, 128.1, 127.4, 126.9, 126.1, 125.9, 125.6, 123.3, 68.1, 51.5, 36.5, 31.9, 28.2. N.B. The peak at 126.9 ppm corresponds to two overlapping signals.

**FTIR (cm<sup>-1</sup>):** 3313, 3066, 2962, 1685, 1616, 1542, 1345, 795, 763.

**Melting Point (°C):** 179 – 181.

**HRMS (ESI):** Exact mass calculated for C<sub>33</sub>H<sub>37</sub>N<sub>2</sub>O<sub>2</sub><sup>+</sup> [M+H]<sup>+</sup>: 493.2850, found: 493.2865.  $\Delta = 3.0$  ppm.

***rac*-(*R<sub>a</sub>*,*R*)-*N*-(2-(*tert*-butyl)phenyl)-*N*-(2-(*tert*-butylamino)-1-(furan-2-yl)-2-oxoethyl)benzamide, *anti*-1k**

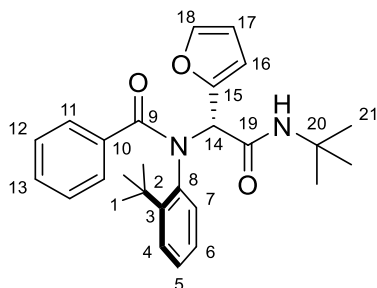

2-*tert*-Butylaniline (180 mg, 1.20 mmol, 1.0 eq.), benzoic acid (147 mg, 1.20 mmol, 1.0 eq.), furfural (99  $\mu$ L, 1.20 mmol, 1.0 eq.), 2,2,2-trifluoroethanol (2.4 ml, 0.5 M) and *tert*-butyl isocyanide (136  $\mu$ L, 1.20 mmol, 1.0 eq.) were subjected to **General Procedure A**. Purification *via* column chromatography eluting with petrol 40-60/Et<sub>2</sub>O 80:20 afforded the title compound *anti*-**1k** as a yellow solid (356 mg, 69% yield, >95:5 d.r.).

**<sup>1</sup>H NMR (300 MHz, CDCl<sub>3</sub>):**  $\delta_{\text{H}}$  8.09 – 8.04 (m, 1H, H<sub>7</sub>), 7.44 (dd,  $J$  = 1.9, 0.8 Hz, 1H, H<sub>18</sub>), 7.34 – 7.14 (m, 6H, H<sub>4</sub>, H<sub>5</sub>, H<sub>6</sub>, H<sub>11</sub> and H<sub>13</sub>), 7.13 – 7.00 (m, 2H, H<sub>12</sub>), 6.86 (dd,  $J$  = 3.4, 0.8 Hz, 1H, H<sub>16</sub>), 6.47 (dd,  $J$  = 3.3, 1.8 Hz, 1H, H<sub>17</sub>), 6.05 (s, 1H, NH), 5.36 (s, 1H, H<sub>14</sub>), 1.34 (s, 9H, H<sub>21</sub>), 0.86 (s, 9H, H<sub>1</sub>).

**<sup>13</sup>C NMR (75 MHz, CDCl<sub>3</sub>):**  $\delta_{\text{C}}$  169.8, 166.6, 150.1, 146.7, 142.3, 141.1, 136.0, 132.2, 130.6, 129.8, 128.2, 127.4, 127.1, 112.6, 111.7, 67.4, 51.8, 36.2, 31.9, 28.7. N.B. The peak at 129.8 ppm corresponds to two overlapping signals.

**FTIR (cm<sup>-1</sup>):** 3300, 2958, 1688, 1624, 1551, 1349, 748, 717, 601.

**Melting Point (°C):** 139 – 140.

**HRMS (ESI):** Exact mass calculated for C<sub>27</sub>H<sub>33</sub>N<sub>2</sub>O<sub>3</sub><sup>+</sup> [M+H]<sup>+</sup>: 433.2486, found: 433.2498.  $\Delta$  = 2.8 ppm.

***rac-(R<sub>a</sub>,R)*-N-(2-(*tert*-butyl)phenyl)-N-(2-(*tert*-butylamino)-1-(ferrocene)-2-oxoethyl)benzamide, *anti*-11**

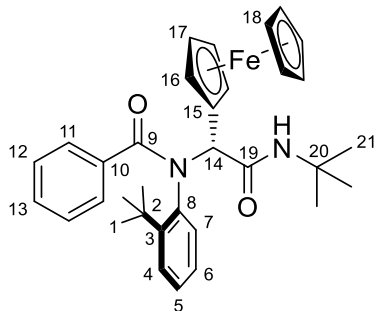

2-*tert*-Butylaniline (180 mg, 1.20 mmol, 1.0 eq.), benzoic acid (147 mg, 1.20 mmol, 1.0 eq.), ferrocenecarboxaldehyde (257 mg, 1.20 mmol, 1.0 eq.), 2,2,2-trifluoroethanol (2.4 ml, 0.5 M) and *tert*-butyl isocyanide (136  $\mu$ L, 1.20 mmol, 1.0 eq.) were subjected to **General Procedure A**. Purification via column chromatography eluting with petrol 40-60/Et<sub>2</sub>O 85:15 afforded the title compound *anti*-11 as an orange solid (503 mg, 76% yield, >95:5 d.r.).

**<sup>1</sup>H NMR (300 MHz, CDCl<sub>3</sub>):**  $\delta_{\text{H}}$  7.28 – 7.22 (m, 1H, H<sub>4</sub>), 7.19 – 7.10 (m, 4H, H<sub>11</sub> and H<sub>Ar</sub>), 7.09 – 7.01 (m, 2H, H<sub>12</sub>), 7.00 – 6.89 (m, 2H, H<sub>Ar</sub>), 6.87 (s, 1H, NH), 5.99 (s, 1H, H<sub>14</sub>), 4.50 – 4.47 (m, 1H, H<sub>Cp</sub>), 4.36 – 4.32 (m, 1H, H<sub>Cp</sub>), 4.27 – 4.17 (m, 7H, H<sub>Cp</sub>), 1.47 (s, 9H, H<sub>21</sub>), 1.02 (s, 9H, H<sub>1</sub>).

**<sup>13</sup>C NMR (75 MHz, CDCl<sub>3</sub>):**  $\delta_{\text{C}}$  170.4, 167.2, 147.0, 138.0, 136.6, 132.5, 130.9, 129.7, 129.6, 128.0, 127.4, 125.4, 83.7, 70.3, 70.2, 69.2, 68.6, 68.5, 64.6, 51.7, 36.6, 32.5, 29.1.

**FTIR (cm<sup>-1</sup>):** 3309, 2982, 1683, 1613, 1598, 1373, 1344, 762, 699.

**Melting Point (°C):** 146 – 148.

**HRMS (ESI):** Exact mass calculated for [C<sub>33</sub>H<sub>38</sub>FeN<sub>2</sub>O<sub>2</sub>]<sup>+</sup> [M]<sup>+</sup>: 550.2277, found: 550.2284.  $\Delta$  = 1.3 ppm.

***rac*-(*R*,*R*)-*N*-(2-(*tert*-butyl)phenyl)-*N*-(1-(*tert*-butylamino)-1-oxo-4-phenylbut-3-en-2-yl)benzamide, *anti*-**1m****

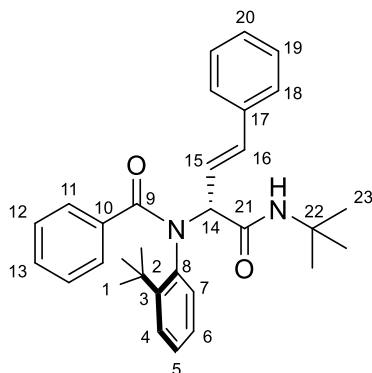

2-*tert*-Butylaniline (180 mg, 1.20 mmol, 1.0 eq.), benzoic acid (147 mg, 1.20 mmol, 1.0 eq.), *trans*-cinnamaldehyde (151  $\mu$ L, 1.20 mmol, 1.0 eq.), 2,2,2-trifluoroethanol (2.4 ml, 0.5 M) and *tert*-butyl isocyanide (136  $\mu$ L, 1.20 mmol, 1.0 eq.) were subjected to **General Procedure A**. Purification *via* column chromatography eluting with petrol 40-60/Et<sub>2</sub>O 80:20 afforded the title compound *anti*-**1m** as a yellow solid (359 mg, 64% yield, >95:5 d.r.).

**<sup>1</sup>H NMR (300 MHz, CDCl<sub>3</sub>):**  $\delta_{\text{H}}$  8.06 (dd,  $J = 7.6, 1.8$  Hz, 1H, H<sub>7</sub>), 7.46 (d,  $J = 7.0$  Hz, 2H, H<sub>18</sub>), 7.43 – 7.05 (m, 12H, H<sub>4</sub>, H<sub>5</sub>, H<sub>6</sub>, H<sub>11</sub>, H<sub>12</sub>, H<sub>13</sub>, H<sub>15</sub> and H<sub>19</sub> and H<sub>20</sub>), 6.56 (d,  $J = 16.2$  Hz, 1H, H<sub>16</sub>), 6.19 (s, 1H, NH), 4.63 (d,  $J = 9.0$  Hz, 1H, H<sub>14</sub>), 1.39 (s, 9H, H<sub>23</sub>), 1.06 (s, 9H, H<sub>1</sub>).

**<sup>13</sup>C NMR (75 MHz, CDCl<sub>3</sub>):**  $\delta_{\text{C}}$  170.3, 168.4, 146.3, 141.7, 136.7, 136.2, 136.1, 132.2, 130.6, 129.8, 129.8, 128.9, 128.5, 128.1, 127.5, 127.3, 126.9, 125.0, 74.3, 51.8, 36.5, 32.6, 28.9.

**FTIR (cm<sup>-1</sup>):** 3401, 2971, 1681, 1633, 1501, 1395, 757, 714, 690.

**Melting Point (°C):** 149 – 150.

**HRMS (ESI):** Exact mass calculated for C<sub>31</sub>H<sub>37</sub>N<sub>2</sub>O<sub>2</sub><sup>+</sup> [M+H]<sup>+</sup>: 469.2850, found: 469.2870.  $\Delta = 4.3$  ppm.



***rac-(R<sub>a</sub>,R)*-N-(2-(*tert*-butyl)phenyl)-N-(2-(*tert*-butylamino)-1-cyclohexyl-2-oxoethyl)benzamide, *anti*-1n**

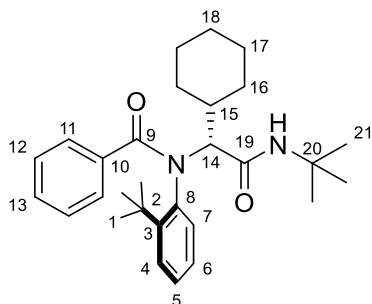

2-*tert*-Butylaniline (180 mg, 1.20 mmol, 1.0 eq.), benzoic acid (147 mg, 1.20 mmol, 1.0 eq.), cyclohexanecarboxaldehyde (145  $\mu$ L, 1.20 mmol, 1.0 eq.), 2,2,2-trifluoroethanol (2.4 ml, 0.5 M) and *tert*-butyl isocyanide (136  $\mu$ L, 1.20 mmol, 1.0 eq.) were subjected to **General Procedure A**. Purification *via* column chromatography eluting with petrol 40-60/Et<sub>2</sub>O 80:20 afforded the title compound ***anti*-1n** as a pale-yellow solid (464 mg, 86% yield, >95:5 d.r.).

**<sup>1</sup>H NMR (300 MHz, CDCl<sub>3</sub>):**  $\delta_{\text{H}}$  7.35 – 7.14 (m, 7H, H<sub>4</sub>, H<sub>5</sub>, H<sub>6</sub>, H<sub>7</sub>, H<sub>11</sub>, H<sub>13</sub>), 7.14 – 7.04 (m, 2H, H<sub>12</sub>), 6.05 (s, 1H, NH), 5.17 (d,  $J$  = 10.6 Hz, 1H, H<sub>14</sub>), 2.33 (m, 1H, H<sub>15</sub>), 2.24 – 2.16 (m, 1H, H<sub>Cy</sub>), 1.80 (m, 3H, H<sub>Cy</sub>), 1.44 – 1.15 (m, 15H, H<sub>21</sub> and H<sub>Cy</sub>), 1.07 (s, 9H, H<sub>1</sub>).

**<sup>13</sup>C NMR (75 MHz, CDCl<sub>3</sub>):**  $\delta_{\text{C}}$  171.1, 168.3, 147.4, 137.6, 136.7, 131.4, 129.9, 129.7, 128.1, 127.4, 125.7, 67.1, 51.7, 41.2, 36.6, 32.5, 30.5, 30.5, 28.9, 26.5, 26.3, 26.2. N.B. The peak at 131.4 ppm corresponds to two overlapping signals.

**FTIR (cm<sup>-1</sup>):** 3339, 3296, 2924, 2851, 1679, 1616, 1543, 715, 630.

**Melting Point (°C):** 169 – 171.

**HRMS (ESI):** Exact mass calculated for C<sub>29</sub>H<sub>41</sub>N<sub>2</sub>O<sub>2</sub><sup>+</sup> [M+H]<sup>+</sup>: 449.3163, found: 449.3177.  $\Delta$  = 3.1 ppm.

***rac*-(*R*,*R*)-*tert*-butyl 4-(1-(*N*-(2-(*tert*-butyl)phenyl)benzamido)-2-(*tert*-butylamino)-2-oxoethyl)piperidine-1-carboxylate, *anti*-1o**

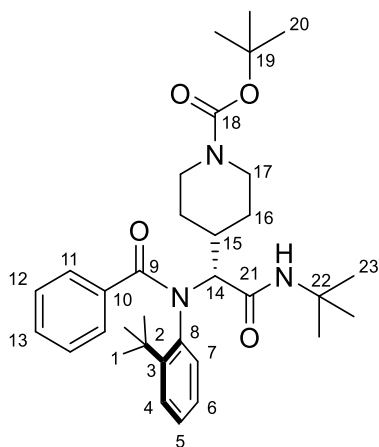

2-*tert*-Butylaniline (180 mg, 1.20 mmol, 1.0 eq.), benzoic acid (147 mg, 1.20 mmol, 1.0 eq.), piperidine-4-carboxaldehyde (256 mg, 1.20 mmol, 1.0 eq.), 2,2,2-trifluoroethanol (2.4 ml, 0.5 M) and *tert*-butyl isocyanide (136  $\mu$ L, 1.20 mmol, 1.0 eq.) were subjected to **General Procedure A**. Purification *via* column chromatography eluting with petrol 40-60/Et<sub>2</sub>O 65:35 afforded the title compound ***anti*-1o** as a white solid (413 mg, 63% yield, >95:5 d.r.).

**<sup>1</sup>H NMR (400 MHz, DMSO-*d*<sub>6</sub>):**  $\delta_{\text{H}}$  8.04 (s, 1H, NH), 7.33 – 7.28 (m, 1H, H<sub>7</sub>), 7.25 – 7.14 (m, 4H, H<sub>4</sub>, H<sub>5</sub>, H<sub>6</sub> and H<sub>13</sub>), 7.14 – 7.08 (m, 4H, H<sub>11</sub> and H<sub>12</sub>), 5.46 (d, *J* = 10.7 Hz, 1H, H<sub>14</sub>), 4.07 – 3.88 (m, 2H, H<sub>16/17</sub>), 3.00 – 2.63 (m, 2H, H<sub>16/17</sub>), 2.41 – 2.27 (m, 1H, H<sub>15</sub>), 2.10 – 2.02 (m, 1H, H<sub>16/17</sub>), 1.40 (s, 12H, H<sub>16/17</sub> and H<sub>20</sub>), 1.19 (s, 9H, H<sub>23</sub>), 0.99 (s, 9H, H<sub>1</sub>).

**<sup>13</sup>C NMR (101 MHz, DMSO-*d*<sub>6</sub>):**  $\delta_{\text{C}}$  169.7, 167.3, 153.8, 146.8, 137.3, 136.8, 131.8, 130.7, 129.1, 127.3, 127.1, 125.1, 78.5, 62.9, 50.5, 42.9 (br), 36.1, 32.0, 28.8 (br), 28.4, 28.1. N.B. A carbon is obscured by the DMSO residual solvent peak but can be observed by HSQC. The peak at 129.1 ppm corresponds to two overlapping signals.

**FTIR (cm<sup>-1</sup>):** 3315, 2971, 1685, 1616, 1595, 1360, 1163, 776, 702.

**Melting Point (°C):** 174 – 176.

**HRMS (ESI):** Exact mass calculated for C<sub>33</sub>H<sub>48</sub>N<sub>3</sub>O<sub>4</sub><sup>+</sup> [M+H]<sup>+</sup>: 550.3639, found: 550.3648.  $\Delta$  = 1.6 ppm.

***rac*-(*R*,*R*)-N-(2-(*tert*-butyl)phenyl)-N-(1-(*tert*-butylamino)-3-methyl-1-oxobutan-2-yl)benzamide, *anti*-1p**

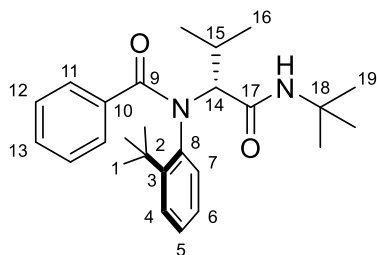

2-*tert*-Butylaniline (180 mg, 1.20 mmol, 1.0 eq.), benzoic acid (147 mg, 1.20 mmol, 1.0 eq.), isobutyraldehyde (110  $\mu$ L, 1.20 mmol, 1.0 eq.), 2,2,2-trifluoroethanol (2.4 ml, 0.5 M) and *tert*-butyl isocyanide (136  $\mu$ L, 1.20 mmol, 1.0 eq.) were subjected to **General Procedure A**. Purification *via* column chromatography eluting with petrol 40-60/Et<sub>2</sub>O 70:30 afforded the title compound *anti*-1p as a white solid (394 mg, 80% yield, >95:5 d.r.).

<sup>1</sup>H NMR (300 MHz, CDCl<sub>3</sub>):  $\delta$ <sub>H</sub> 7.39 – 7.34 (m, 1H, H<sub>7</sub>), 7.31 – 7.24 (m, 3H, H<sub>4</sub> and H<sub>11</sub>), 7.23 – 7.15 (m, 3H, H<sub>5</sub>, H<sub>6</sub> and H<sub>13</sub>), 7.14 – 7.06 (m, 2H, H<sub>12</sub>), 6.22 (s, 1H, NH), 5.14 (d, *J* = 10.6 Hz, 1H, H<sub>14</sub>), 2.68 (d sext, *J* = 10.6, 6.6 Hz, 1H, H<sub>15</sub>), 1.30 (d, *J* = 6.7 Hz, 3H, H<sub>16</sub>), 1.26 (s, 9H, H<sub>19</sub>), 1.12 (d, *J* = 6.5 Hz, 3H, H<sub>16'</sub>), 1.08 (s, 9H, H<sub>1</sub>).

<sup>13</sup>C NMR (75 MHz, CDCl<sub>3</sub>):  $\delta$ <sub>C</sub> 171.2, 168.5, 147.3, 137.7, 136.7, 131.4, 129.8, 129.7, 128.2, 127.4, 125.6, 68.1, 51.7, 36.6, 32.5, 32.1, 28.8, 20.3, 20.1. N.B. The peak at 131.4 ppm corresponds to two overlapping signals.

FTIR (cm<sup>-1</sup>): 3317, 2965, 1681, 1613, 1543, 1359, 758, 716, 627.

Melting Point (°C): 173 – 175.

HRMS (ESI): Exact mass calculated for C<sub>26</sub>H<sub>37</sub>N<sub>2</sub>O<sub>2</sub><sup>+</sup> [M+H]<sup>+</sup>: 409.2850, found: 409.2849.  $\Delta$  = -0.2 ppm.

***rac*-(*R*,*R*)-*N*-(2-(*tert*-butyl)phenyl)-*N*-(2-(*tert*-butylamino)-2-oxo-1-phenylethyl)-4-(trifluoromethyl)benzamide, *anti*-1q**

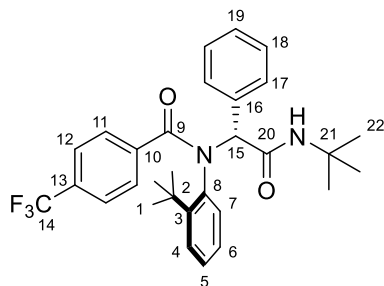

2-*tert*-Butylaniline (180 mg, 1.20 mmol, 1.0 eq.), 4-(trifluoromethyl)benzoic acid (228 mg, 1.20 mmol, 1.0 eq.), benzaldehyde (122  $\mu$ L, 1.20 mmol, 1.0 eq.), 2,2,2-trifluoroethanol (2.4 ml, 0.5 M) and *tert*-butyl isocyanide (136  $\mu$ L, 1.20 mmol, 1.0 eq.) were subjected to **General Procedure A**. [N.B. in this case, the crude residue obtained upon removal of 2,2,2-trifluoroethanol was directly purified via column chromatography without an aqueous workup]. Purification *via* column chromatography eluting with petrol 40-60/EtOAc 90:10 afforded the title compound *anti*-1q as a white solid (513 mg, 84% yield, >95:5 d.r.).

**$^1\text{H}$  NMR (300 MHz,  $\text{CDCl}_3$ ):**  $\delta_{\text{H}}$  7.99 (dd,  $J = 7.9, 2.0$  Hz, 1H, H<sub>7</sub>), 7.76 – 7.66 (m, 2H, H<sub>17</sub>), 7.49 – 7.31 (m, 7H, H<sub>11</sub>, H<sub>12</sub>, H<sub>18</sub> and H<sub>19</sub>), 7.30 – 7.18 (m, 3H, H<sub>4</sub>, H<sub>5</sub> and H<sub>6</sub>), 5.60 (s, 1H, NH), 5.32 (s, 1H, H<sub>15</sub>), 1.30 (s, 9H, H<sub>22</sub>), 0.78 (s, 9H, H<sub>1</sub>).

**$^{13}\text{C}$  NMR (75 MHz,  $\text{CDCl}_3$ ):**  $\delta_{\text{C}}$  169.3, 167.7, 146.8, 141.2, 140.1, 136.3, 132.2, 131.2 (q,  $J = 33.1$  Hz), 131.1, 130.8, 130.1, 129.3, 129.2, 128.4, 127.2, 124.4 (q,  $J = 3.8$  Hz), 123.7 (q,  $J = 272.3$  Hz), 75.0, 51.9, 36.2, 32.2, 28.7.

**$^{19}\text{F}\{^1\text{H}\}$  NMR (282 MHz,  $\text{CDCl}_3$ ):**  $\delta_{\text{F}}$  –63.0.

**FTIR ( $\text{cm}^{-1}$ ):** 3301, 2966, 1683, 1638, 1324, 1314, 1164, 1127, 1066, 770, 702.

**Melting Point ( $^{\circ}\text{C}$ ):** 168 – 169.

**HRMS (ESI):** Exact mass calculated for  $\text{C}_{30}\text{H}_{34}\text{F}_3\text{N}_2\text{O}_2^+$  [ $\text{M}+\text{H}$ ] $^+$ : 511.2567, found: 511.2580.  $\Delta = 2.5$  ppm.

***rac*-(*R*,*R*)-*N*-(2-(*tert*-butyl)phenyl)-*N*-(2-(*tert*-butylamino)-2-oxo-1-phenylethyl)-4-(trifluoromethylthio)benzamide, *anti*-1r**

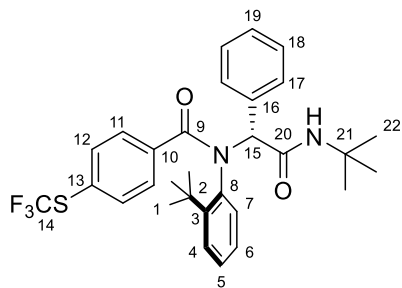

2-*tert*-Butylaniline (180 mg, 1.20 mmol, 1.0 eq.), 4-(trifluoromethylthio)benzoic acid (267 mg, 1.20 mmol, 1.0 eq.), benzaldehyde (122  $\mu$ L, 1.20 mmol, 1.0 eq.), 2,2,2-trifluoroethanol (2.4 ml, 0.5 M) and *tert*-butyl isocyanide (136  $\mu$ L, 1.20 mmol, 1.0 eq.) were subjected to **General Procedure A**. [N.B. in this case, the crude residue obtained upon removal of 2,2,2-trifluoroethanol was directly purified via column chromatography without an aqueous workup]. Purification via column chromatography eluting with dichloromethane, increasing to dichloromethane:MeOH 99:1 afforded the title compound *anti*-1r as an off-white solid (538 mg, 83% yield, >95:5 d.r.).

**$^1\text{H}$  NMR (300 MHz,  $\text{CDCl}_3$ ):**  $\delta_{\text{H}}$  7.97 (dd,  $J = 7.9, 2.1$  Hz, 1H, H<sub>7</sub>), 7.71 (dd,  $J = 6.8, 2.9$  Hz, 2H, H<sub>17</sub>), 7.47 – 7.35 (m, 5H, H<sub>12</sub>, H<sub>18</sub> and H<sub>19</sub>), 7.33 – 7.19 (m, 5H, H<sub>4</sub>, H<sub>5</sub>, H<sub>6</sub> and H<sub>11</sub>), 5.61 (s, 1H, NH), 5.35 (s, 1H, H<sub>15</sub>), 1.30 (s, 9H, H<sub>22</sub>), 0.77 (s, 9H, H<sub>1</sub>).

**$^{13}\text{C}$  NMR (75 MHz,  $\text{CDCl}_3$ ):**  $\delta_{\text{C}}$  169.3, 167.7, 146.8, 141.1, 138.9, 136.3, 135.0, 132.1, 131.1, 130.9, 130.7, 129.4 (q,  $J = 308.2$  Hz), 129.3, 129.2, 128.3, 127.2, 126.0 (q,  $J = 2.1$  Hz), 74.9, 51.9, 36.2, 32.1, 28.7.

**$^{19}\text{F}$  NMR (282 MHz,  $\text{CDCl}_3$ ):**  $\delta_{\text{F}}$  –42.5 (s).

**FTIR ( $\text{cm}^{-1}$ ):** 3299, 2982, 1681, 1637, 1541, 1114, 1084, 769, 701, 618.

**Melting Point ( $^{\circ}\text{C}$ ):** 153 – 155.

**HRMS (ESI):** Exact mass calculated for  $\text{C}_{30}\text{H}_{34}\text{F}_3\text{N}_2\text{O}_2\text{S}^+$  [ $\text{M}+\text{H}$ ] $^+$ : 543.2288, found: 543.2288.  $\Delta = 0.0$  ppm.

***rac*-(*R<sub>a</sub>*,*R*)-*N*-(2-(*tert*-butyl)phenyl)-*N*-(2-(*tert*-butylamino)-2-oxo-1-phenylethyl)-4-methoxybenzamide, *anti*-1s**

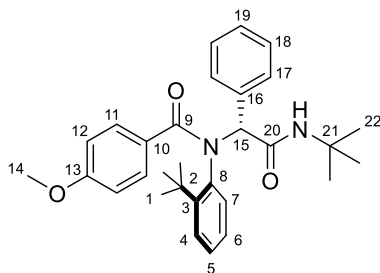

2-*tert*-Butylaniline (180 mg, 1.20 mmol, 1.0 eq.), 4-methoxybenzoic acid (183 mg, 1.20 mmol, 1.0 eq.), benzaldehyde (122  $\mu$ L, 1.20 mmol, 1.0 eq.), 2,2,2-trifluoroethanol (2.4 ml, 0.5 M) and *tert*-butyl isocyanide (136  $\mu$ L, 1.20 mmol, 1.0 eq.) were subjected to **General Procedure A**. Purification *via* column chromatography eluting with petrol 40-60/EtOAc 85:15 afforded the title compound ***anti*-1s** as a white solid (423 mg, 75% yield, >95:5 d.r.).

**<sup>1</sup>H NMR (300 MHz, CDCl<sub>3</sub>):**  $\delta_{\text{H}}$  7.85 – 7.79 (m, 1H, H<sub>7</sub>), 7.68 (dd, *J* = 7.4, 2.2 Hz, 2H, H<sub>17</sub>), 7.43 – 7.33 (m, 3H, H<sub>18</sub> and H<sub>19</sub>), 7.32 – 7.27 (m, 1H, H<sub>4</sub>), 7.25 – 7.16 (m, 4H, H<sub>5</sub>, H<sub>6</sub> and H<sub>11</sub>), 6.62 – 6.54 (m, 2H, H<sub>12</sub>), 5.72 (s, 1H, NH), 5.42 (s, 1H, H<sub>15</sub>), 3.70 (s, 3H, H<sub>14</sub>), 1.27 (s, 9H, H<sub>22</sub>), 0.85 (s, 9H, H<sub>1</sub>).

**<sup>13</sup>C NMR (75 MHz, CDCl<sub>3</sub>):**  $\delta_{\text{C}}$  170.0, 168.1, 160.6, 146.9, 141.6, 136.8, 132.3, 131.8, 130.8, 130.7, 129.0, 128.9, 128.7, 127.9, 126.8, 112.7, 74.3, 55.3, 51.7, 36.3, 32.2, 28.7.

**FTIR (cm<sup>-1</sup>):** 3302, 2972, 1685, 1655, 1611, 1342, 1258, 1176, 760, 698.

**Melting Point (°C):** 145 – 147.

**HRMS (ESI):** Exact mass calculated for C<sub>30</sub>H<sub>37</sub>N<sub>2</sub>O<sub>3</sub><sup>+</sup> [M+H]<sup>+</sup>: 473.2799, found: 473.2822.  $\Delta$  = 4.9 ppm.

***rac*-(*R*,*R*)-*N*-(2-(*tert*-butyl)phenyl)-*N*-(2-(*tert*-butylamino)-2-oxo-1-phenylethyl)-3-methylbenzamide, *anti*-1t**

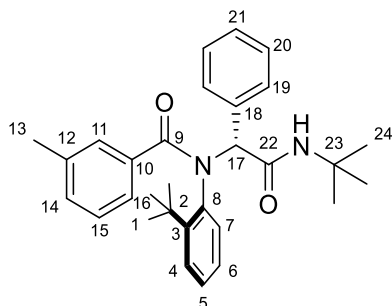

2-*tert*-Butylaniline (180 mg, 1.20 mmol, 1.0 eq.), 3-methylbenzoic acid (163 mg, 1.20 mmol, 1.0 eq.), benzaldehyde (122  $\mu$ L, 1.20 mmol, 1.0 eq.), 2,2,2-trifluoroethanol (2.4 ml, 0.5 M) and *tert*-butyl isocyanide (136  $\mu$ L, 1.20 mmol, 1.0 eq.) were subjected to **General Procedure A**. Purification via column chromatography eluting with petrol 40-60/EtOAc 90:10 afforded the title compound *anti*-1t as a pale yellow solid (463 mg, 85% yield, >95:5 d.r.).

**$^1\text{H}$  NMR (300 MHz,  $\text{CDCl}_3$ ):**  $\delta_{\text{H}}$  7.95 – 7.86 (m, 1H, H<sub>7</sub>), 7.74 – 7.66 (m, 2H, H<sub>19</sub>), 7.43 – 7.34 (m, 3H, H<sub>20</sub> and H<sub>21</sub>), 7.30 – 7.17 (m, 3H, H<sub>4</sub>, H<sub>5</sub> and H<sub>6</sub>), 7.11 (d,  $J$  = 2.0 Hz, 1H, H<sub>11</sub>), 7.05 – 6.90 (m, 3H, H<sub>14</sub>, H<sub>15</sub> and H<sub>16</sub>), 5.70 (s, 1H, NH), 5.40 (s, 1H, H<sub>17</sub>), 2.13 (s, 3H, H<sub>13</sub>), 1.29 (s, 9H, H<sub>24</sub>), 0.82 (s, 9H, H<sub>1</sub>).

**$^{13}\text{C}$  NMR (75 MHz,  $\text{CDCl}_3$ ):**  $\delta_{\text{C}}$  170.7, 168.0, 146.8, 141.5, 137.0, 136.7, 136.4, 132.4, 130.9, 130.6, 130.6, 130.3, 129.1, 128.8, 127.9, 127.2, 126.8, 126.7, 74.4, 51.7, 36.2, 32.2, 28.7, 21.2.

**FTIR ( $\text{cm}^{-1}$ ):** 3308, 2981, 1687, 1616, 1553, 1360, 769, 701, 617.

**Melting Point ( $^{\circ}\text{C}$ ):** 142 – 143.

**HRMS (ESI):** Exact mass calculated for  $\text{C}_{30}\text{H}_{37}\text{N}_2\text{O}_2^+$  [ $\text{M}+\text{H}$ ]<sup>+</sup>: 457.2850, found: 457.2854  $\Delta$  = 0.9 ppm.

***rac*-(*R*,*R*)-*N*-(2-(*tert*-butyl)phenyl)-*N*-(2-(*tert*-butylamino)-2-oxo-1-phenylethyl)-1-naphthamide, *anti*-1u**

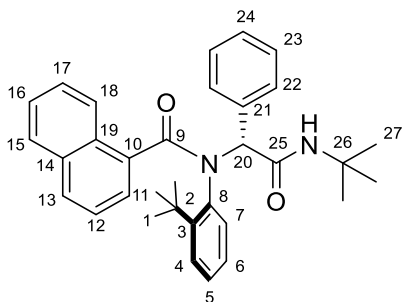

2-*tert*-Butylaniline (180 mg, 1.20 mmol, 1.0 eq.), 1-naphthoic acid (207 mg, 1.20 mmol, 1.0 eq.), benzaldehyde (122  $\mu$ L, 1.20 mmol, 1.0 eq.), 2,2,2-trifluoroethanol (2.4 ml, 0.5 M) and *tert*-butyl isocyanide (136  $\mu$ L, 1.20 mmol, 1.0 eq.) were subjected to **General Procedure A** with a modified workup procedure. The concentrated crude reaction mixture was dissolved in dichloromethane and saturated aqueous  $\text{Na}_2\text{CO}_3$  was added. The layers were separated, and the aqueous layer was extracted twice with dichloromethane. The combined organic extracts were dried over  $\text{MgSO}_4$ , filtered and the resulting solution was concentrated. Purification via column chromatography eluting with dichloromethane/ $\text{Et}_2\text{O}$  99:1 afforded the title compound *anti*-1u as a pale-yellow solid (432 mg, 73% yield, >95:5 d.r.).

**$^1\text{H}$  NMR (300 MHz,  $\text{CDCl}_3$ ):**  $\delta_{\text{H}}$  8.45 (d,  $J = 8.5$  Hz, 1H,  $\text{H}_{\text{Ar}}$ ), 8.10 – 7.98 (m, 1H,  $\text{H}_7$ ), 7.86 – 7.78 (m, 2H,  $\text{H}_{22}$ ), 7.71 (d,  $J = 8.1$  Hz, 1H,  $\text{H}_{\text{Ar}}$ ), 7.62 (d,  $J = 8.2$  Hz, 1H,  $\text{H}_{\text{Ar}}$ ), 7.52 (ddd,  $J = 8.5, 6.8, 1.5$  Hz, 1H,  $\text{H}_{\text{Ar}}$ ), 7.48 – 7.38 (m, 4H,  $\text{H}_{\text{Ar}}$ ), 7.30 – 7.24 (m, 1H,  $\text{H}_{11}$ ), 7.20 – 7.13 (m, 1H,  $\text{H}_4$ ), 7.12 – 7.01 (m, 3H,  $\text{H}_{\text{Ar}}$ ), 5.80 (s, 1H, NH), 5.39 (s, 1H,  $\text{H}_{20}$ ), 1.34 (s, 9H,  $\text{H}_{27}$ ), 0.79 (s, 9H,  $\text{H}_1$ ).

**$^{13}\text{C}$  NMR (75 MHz,  $\text{CDCl}_3$ ):**  $\delta_{\text{C}}$  171.1, 168.5, 146.4, 141.8, 137.0, 133.7, 132.9, 132.9, 131.4, 131.1, 130.3, 129.7, 129.2, 128.9, 128.3, 127.8, 127.4, 126.7, 126.6, 125.8, 123.6, 74.8, 51.8, 36.2, 32.4, 28.8. N.B. The peak at 126.7 ppm corresponds to two overlapping signals.

**FTIR ( $\text{cm}^{-1}$ ):** 3308, 2971, 1692, 1613, 1552, 1360, 1257, 1212, 1166.

**Melting Point ( $^{\circ}\text{C}$ ):** 190 – 191.

**HRMS (ESI):** Exact mass calculated for  $\text{C}_{33}\text{H}_{37}\text{N}_2\text{O}_2^+$  [ $\text{M}+\text{H}$ ] $^+$ : 493.2850, found: 493.2860.  $\Delta = 2.0$  ppm.



***rac*-(*R*,*R*)-*N*-(2-(*tert*-butyl)phenyl)-*N*-(2-(*tert*-butylamino)-2-oxo-1-phenylethyl)-2-fluorobenzamide, *anti*-**1v****

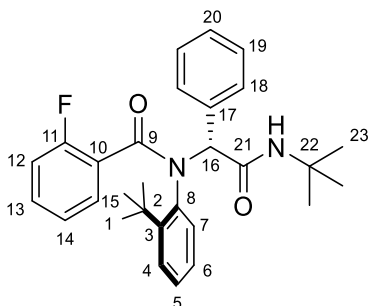

2-*tert*-Butylaniline (180 mg, 1.20 mmol, 1.0 eq.), 2-fluorobenzoic acid (168 mg, 1.20 mmol, 1.0 eq.), benzaldehyde (122  $\mu$ L, 1.20 mmol, 1.0 eq.), 2,2,2-trifluoroethanol (2.4 ml, 0.5 M) and *tert*-butyl isocyanide (136  $\mu$ L, 1.20 mmol, 1.0 eq.) were subjected to **General Procedure A**. [N.B. in this case, the crude residue obtained upon removal of 2,2,2-trifluoroethanol was directly purified via column chromatography without an aqueous workup]. Purification *via* column chromatography eluting with petrol 40-60/EtOAc 90:10 afforded the title compound *anti*-**1v** as a white solid (484 mg, 88% yield, >95:5 d.r.).

**$^1\text{H NMR}$  (300 MHz,  $\text{CDCl}_3$ ):**  $\delta_{\text{H}}$  7.95 – 7.90 (m, 1H, H<sub>7</sub>), 7.71 (dd,  $J$  = 7.5, 2.2 Hz, 2H, H<sub>18</sub>), 7.48 – 7.33 (m, 3H, H<sub>19</sub> and H<sub>20</sub>), 7.29 – 7.03 (m, 5H, H<sub>4</sub>, H<sub>5</sub>, H<sub>6</sub>, H<sub>13</sub> and H<sub>15</sub>), 6.91 (ddd,  $J$  = 10.4, 8.3, 1.1 Hz, 1H, H<sub>12</sub>), 6.79 (td,  $J$  = 7.6, 1.2 Hz, 1H, H<sub>14</sub>), 5.69 (s, 1H, NH), 5.41 (s, 1H, H<sub>16</sub>), 1.29 (s, 9H, H<sub>23</sub>), 0.94 (s, 9H, H<sub>1</sub>).

**$^{13}\text{C NMR}$  (75 MHz,  $\text{CDCl}_3$ ):**  $\delta_{\text{C}}$  167.9, 167.3 (d,  $J$  = 1.2 Hz), 159.7 (d,  $J$  = 251.8 Hz), 147.1, 140.4, 136.6, 132.7, 131.0 (d,  $J$  = 8.6 Hz), 130.7, 130.4, 130.4, 129.2, 128.9, 128.1, 126.5, 125.0 (d,  $J$  = 13.5 Hz), 122.9 (d,  $J$  = 3.6 Hz), 116.0 (d,  $J$  = 22.1 Hz), 73.9, 51.8, 36.3, 32.3, 28.7.

**$^{19}\text{F NMR}$  (282 MHz,  $\text{CDCl}_3$ ):**  $\delta_{\text{F}}$  -110.0 (dt,  $J$  = 11.4, 6.3 Hz).

**FTIR ( $\text{cm}^{-1}$ ):** 3315, 3069, 2958, 1685, 1619, 1552, 1364, 758, 700, 641.

**Melting Point ( $^{\circ}\text{C}$ ):** 171 – 173.

**HRMS (ESI):** Exact mass calculated for  $\text{C}_{29}\text{H}_{34}\text{FN}_2\text{O}_2^+$   $[\text{M}+\text{H}]^+$ : 461.2599, found: 461.2614.  $\Delta$  = 3.3 ppm.

***rac*-(*R*,*R*)-2-((2-(*tert*-butyl)phenyl)(2-(*tert*-butylamino)-2-oxo-1-phenylethyl)carbamoyl)phenyl acetate, *anti*-1w**

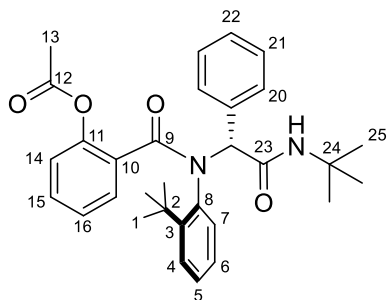

2-*tert*-Butylaniline (180 mg, 1.20 mmol, 1.0 eq.), 2-acetoxybenzoic acid (216 mg, 1.20 mmol, 1.0 eq.), benzaldehyde (122  $\mu$ L, 1.20 mmol, 1.0 eq.), 2,2,2-trifluoroethanol (2.4 ml, 0.5 M) and *tert*-butyl isocyanide (136  $\mu$ L, 1.20 mmol, 1.0 eq.) were subjected to **General Procedure A**. Purification via column chromatography eluting with petrol 40-60/Et<sub>2</sub>O 70:30 afforded the title compound *anti*-1w as a white solid (498 mg, 83% yield, >95:5 d.r.).

**<sup>1</sup>H NMR (300 MHz, CDCl<sub>3</sub>):**  $\delta_{\text{H}}$  7.83 (dd,  $J = 6.0, 3.6$  Hz, 1H, H<sub>7</sub>), 7.69 (dd,  $J = 6.7, 2.9$  Hz, 2H, H<sub>20</sub>), 7.46 – 7.33 (m, 3H, H<sub>21</sub> and H<sub>22</sub>), 7.31 – 7.21 (m, 1H, H<sub>4</sub>), 7.20 – 7.11 (m, 3H, H<sub>5</sub>, H<sub>6</sub>, H<sub>Ar</sub>), 7.08 – 6.99 (m, 2H, H<sub>17</sub> and H<sub>Ar</sub>), 6.92 – 6.78 (m, 1H, H<sub>Ar</sub>), 5.67 (s, 1H, NH), 5.42 (s, 1H, H<sub>18</sub>), 2.31 (s, 3H, H<sub>13</sub>), 1.27 (s, 9H, H<sub>25</sub>), 1.00 (s, 9H, H<sub>1</sub>).

**<sup>13</sup>C NMR (75 MHz, CDCl<sub>3</sub>):** 169.0, 167.9, 148.5, 147.0, 140.4, 137.0, 132.9, 130.6, 130.5, 129.9, 129.6, 129.2, 129.0, 128.8, 128.1, 126.4, 124.5, 123.5, 72.9, 51.7, 36.3, 32.3, 28.7, 21.3. N.B. The peak at 167.9 ppm corresponds to two overlapping signals.

**FTIR (cm<sup>-1</sup>):** 3324, 2981, 1771, 1692, 1622, 1548, 1358, 1190, 761, 641.

**Melting Point (°C):** 151 – 152.

**HRMS (ESI):** Exact mass calculated for C<sub>31</sub>H<sub>37</sub>N<sub>2</sub>O<sub>4</sub><sup>+</sup> [M+H]<sup>+</sup>: 501.2748, found: 501.2761.  $\Delta = 2.6$  ppm.

***rac-(R<sub>a</sub>,R)*-N-(2-(*tert*-butyl)phenyl)-N-(2-(*tert*-butylamino)-2-oxo-1-phenylethyl)picolinamide, *anti*-1x**

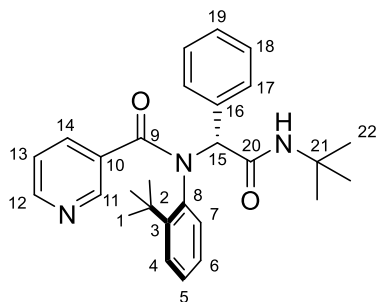

2-*tert*-Butylaniline (180 mg, 1.20 mmol, 1.0 eq.), nicotinic acid (148 mg, 1.20 mmol, 1.0 eq.), benzaldehyde (122  $\mu$ L, 1.20 mmol, 1.0 eq.), 2,2,2-trifluoroethanol (2.4 ml, 0.5 M) and *tert*-butyl isocyanide (136  $\mu$ L, 1.20 mmol, 1.0 eq.) were subjected to **General Procedure A**. Purification via column chromatography eluting with petrol 40-60/Et<sub>2</sub>O 30:70 afforded the title compound *anti*-1x as a white solid (414 mg, 78% yield, >95:5 d.r.).

**<sup>1</sup>H NMR (300 MHz, CDCl<sub>3</sub>):**  $\delta$ <sub>H</sub> 8.52 (dd,  $J$  = 2.4, 0.9 Hz, 1H, H<sub>11</sub>), 8.40 (dd,  $J$  = 4.9, 1.7 Hz, 1H, H<sub>12</sub>), 8.04 – 7.95 (m, 1H, H<sub>7</sub>), 7.75 – 7.67 (m, 2H, H<sub>17</sub>), 7.48 (ddd,  $J$  = 8.1, 2.3, 1.7 Hz, 1H, H<sub>14</sub>), 7.45 – 7.38 (m, 3H, H<sub>18</sub> and H<sub>19</sub>), 7.34 – 7.20 (m, 3H, H<sub>4</sub>, H<sub>5</sub> and H<sub>6</sub>), 7.01 (ddd,  $J$  = 8.0, 4.9, 0.9 Hz, 1H, H<sub>13</sub>), 5.61 (s, 1H, NH), 5.35 (s, 1H, H<sub>15</sub>), 1.30 (s, 9H, H<sub>22</sub>), 0.81 (s, 9H, H<sub>1</sub>).

**<sup>13</sup>C NMR (75 MHz, CDCl<sub>3</sub>):**  $\delta$ <sub>C</sub> 168.5, 167.6, 150.6, 150.2, 146.8, 141.0, 136.9, 136.3, 132.6, 132.1, 131.0, 130.8, 129.3, 129.2, 128.5, 127.3, 122.2, 74.8, 51.9, 36.2, 32.2, 28.7.

**FTIR (cm<sup>-1</sup>):** 3317, 2964, 1685, 1615, 1548, 1362, 761, 701, 642.

**Melting Point (°C):** 156 – 158.

**HRMS (ESI):** Exact mass calculated for C<sub>28</sub>H<sub>34</sub>N<sub>3</sub>O<sub>2</sub><sup>+</sup> [M+H]<sup>+</sup>: 444.2646, found: 444.2662.  $\Delta$  = 3.6 ppm.

***rac*-(*R<sub>a</sub>*,*R*)-*N*-(2-(*tert*-butyl)phenyl)-*N*-(2-(*tert*-butylamino)-2-oxo-1-phenylethyl)furan-2-carboxamide, *anti*-**1y****

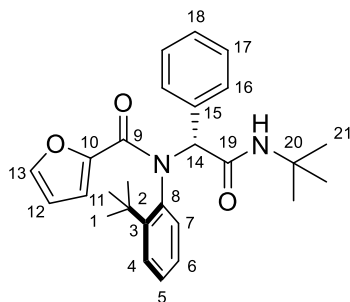

2-*tert*-Butylaniline (180 mg, 1.20 mmol, 1.0 eq.), 2-furoic acid (135 mg, 1.20 mmol, 1.0 eq.), benzaldehyde (122  $\mu$ L, 1.20 mmol, 1.0 eq.), 2,2,2-trifluoroethanol (2.4 ml, 0.5 M) and *tert*-butyl isocyanide (136  $\mu$ L, 1.20 mmol, 1.0 eq.) were subjected to **General Procedure A**. [N.B. in this case, the crude residue obtained upon removal of 2,2,2-trifluoroethanol was directly purified via column chromatography without an aqueous workup]. Purification via column chromatography eluting with petrol 40-60/Et<sub>2</sub>O 70:30 afforded the title compound *anti*-**1y** as a white solid (465 mg, 90% yield, >95:5 d.r.).

**<sup>1</sup>H NMR (300 MHz, CDCl<sub>3</sub>):**  $\delta_{\text{H}}$  7.84 (dd,  $J = 7.8, 1.7$  Hz, 1H, H<sub>7</sub>), 7.70 – 7.64 (m, 2H, H<sub>16</sub>), 7.48 (dd,  $J = 8.0, 1.7$  Hz, 1H, H<sub>4</sub>), 7.40 – 7.32 (m, 5H, H<sub>5</sub>, H<sub>13</sub>, H<sub>17</sub> and H<sub>18</sub>), 7.28 (td,  $J = 7.5, 1.8$  Hz, 1H, H<sub>6</sub>), 6.12 (dd,  $J = 3.6, 1.7$  Hz, 1H, H<sub>12</sub>), 5.70 (s, 1H, NH), 5.22 (s, 1H, H<sub>14</sub>), 5.15 (dd,  $J = 3.6, 0.7$  Hz, 1H, H<sub>11</sub>), 1.29 (s, 9H, H<sub>21</sub>), 0.98 (s, 9H, H<sub>1</sub>).

**<sup>13</sup>C NMR (75 MHz, CDCl<sub>3</sub>):**  $\delta_{\text{C}}$  168.0, 161.1, 147.7, 147.5, 144.7, 141.4, 136.6, 132.7, 130.9, 129.9, 129.0, 128.8, 128.8, 127.7, 116.9, 111.1, 74.3, 51.7, 36.3, 32.2, 28.7.

**FTIR (cm<sup>-1</sup>):** 3315, 2961, 1686, 1624, 1556, 1359, 758, 699, 559.

**Melting Point (°C):** 159 – 160.

**HRMS (ESI):** Exact mass calculated for C<sub>27</sub>H<sub>33</sub>N<sub>2</sub>O<sub>3</sub><sup>+</sup> [M+H]<sup>+</sup>: 433.2486, found: 433.2488.  $\Delta = 0.5$  ppm.

***rac*-(*R*,*R*)-*N*-(2-(*tert*-butyl)phenyl)-*N*-(2-(*tert*-butylamino)-2-oxo-1-phenylethyl)-3-phenylpropanamide, *anti*-**1z****

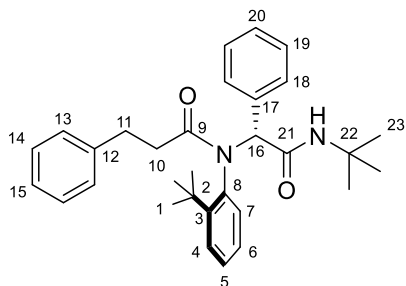

2-*tert*-Butylaniline (180 mg, 1.20 mmol, 1.0 eq.), hydrocinnamic acid (180 mg, 1.20 mmol, 1.0 eq.), benzaldehyde (122  $\mu$ L, 1.20 mmol, 1.0 eq.), 2,2,2-trifluoroethanol (2.4 ml, 0.5 M) and *tert*-butyl isocyanide (136  $\mu$ L, 1.20 mmol, 1.0 eq.) were subjected to **General Procedure A**. [N.B. in this case, the crude residue obtained upon removal of 2,2,2-trifluoroethanol was directly purified via column chromatography without an aqueous workup]. Purification *via* column chromatography eluting with petrol 40-60/EtOAc 90:10 afforded the title compound *anti*-**1z** as a pale-yellow solid (484 mg, 86% yield, >95:5 d.r.).

**<sup>1</sup>H NMR (300 MHz, CDCl<sub>3</sub>):**  $\delta_{\text{H}}$  7.66 (dd,  $J = 7.7, 1.8$  Hz, 1H, H<sub>7</sub>), 7.58 – 7.52 (m, 2H, H<sub>18</sub>), 7.45 (dd,  $J = 7.9, 1.8$  Hz, 1H, H<sub>4</sub>), 7.40 – 7.31 (m, 3H, H<sub>19</sub> and H<sub>20</sub>), 7.28 – 7.10 (m, 5H, H<sub>5</sub>, H<sub>6</sub>, H<sub>14</sub> and H<sub>15</sub>), 7.05 (d,  $J = 6.7$  Hz, 2H, H<sub>13</sub>), 5.74 (s, 1H, NH), 5.04 (s, 1H, H<sub>16</sub>), 3.15 – 2.76 (m, 2H, H<sub>11</sub>), 2.37 – 2.25 (m, 2H, H<sub>10</sub>), 1.29 (s, 9H, H<sub>23</sub>), 1.12 (s, 9H, H<sub>1</sub>).

**<sup>13</sup>C NMR (75 MHz, CDCl<sub>3</sub>):**  $\delta_{\text{C}}$  175.1, 168.6, 146.7, 142.3, 141.4, 136.9, 132.1, 130.4, 129.5, 128.9, 128.6, 128.5, 128.4, 127.7, 126.0, 73.4, 51.6, 38.7, 36.2, 32.1, 31.4, 28.7. N.B. The peak at 128.5 ppm corresponds to two overlapping signals.

**FTIR (cm<sup>-1</sup>):** 3340, 2960, 1686, 1631, 1536, 754, 698, 541.

**Melting Point (°C):** 121 – 122.

**HRMS (ESI):** Exact mass calculated for C<sub>31</sub>H<sub>39</sub>N<sub>2</sub>O<sub>2</sub><sup>+</sup> [M+H]<sup>+</sup>: 471.3006, found: 471.3010.  $\Delta = 0.8$  ppm.

***rac*-(*R<sub>a</sub>*,*R*)-*N*-(*tert*-butyl)-2-(*N*-(2-(*tert*-butyl)phenyl)acetamido)-2-phenylacetamide, *anti*-1aa**

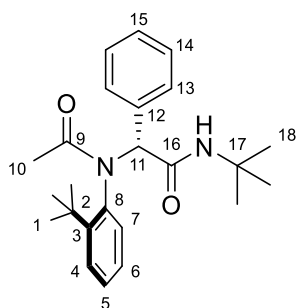

2-*tert*-Butylaniline (180 mg, 1.20 mmol, 1.0 eq.), acetic acid (69  $\mu$ L, 1.20 mmol, 1.0 eq.), benzaldehyde (122  $\mu$ L, 1.20 mmol, 1.0 eq.), 2,2,2-trifluoroethanol (2.4 ml, 0.5 M) and *tert*-butyl isocyanide (136  $\mu$ L, 1.20 mmol, 1.0 eq.) were subjected to **General Procedure A**. Purification via column chromatography eluting with petrol 40-60/Et<sub>2</sub>O 75:25 afforded the title compound *anti*-1aa as a white solid (349 mg, 76% yield, >95:5 d.r.).

**<sup>1</sup>H NMR (300 MHz, CDCl<sub>3</sub>):**  $\delta_{\text{H}}$  7.72 (dd,  $J = 7.6, 1.8$  Hz, 1H, H<sub>7</sub>), 7.58 – 7.53 (m, 2H, H<sub>13</sub>), 7.47 (dd,  $J = 7.8, 1.9$  Hz, 1H, H<sub>4</sub>), 7.38 – 7.31 (m, 3H, H<sub>14</sub> and H<sub>15</sub>), 7.31 – 7.19 (m, 2H, H<sub>5</sub> and H<sub>6</sub>), 5.68 (s, 1H, NH), 5.04 (s, 1H, H<sub>11</sub>), 1.85 (s, 3H, H<sub>10</sub>), 1.27 (s, 9H, H<sub>18</sub>), 1.15 (s, 9H, H<sub>1</sub>).

**<sup>13</sup>C NMR (75 MHz, CDCl<sub>3</sub>):**  $\delta_{\text{C}}$  173.7, 168.5, 146.7, 143.1, 137.0, 132.1, 130.6, 129.5, 128.9, 128.6, 128.4, 127.7, 73.1, 51.6, 36.1, 32.1, 28.7, 24.8.

**FTIR (cm<sup>-1</sup>):** 3306, 2968, 1684, 1627, 1555, 1333, 763, 702, 555.

**Melting Point (°C):** 131 – 133.

**HRMS (ESI):** Exact mass calculated for C<sub>24</sub>H<sub>32</sub>N<sub>2</sub>O<sub>2</sub>Na<sup>+</sup> [M+Na]<sup>+</sup>: 403.2356, found: 403.2371.  $\Delta = 3.7$  ppm.

***rac*-(*R<sub>a</sub>,R<sub>b</sub>*)- (9H-fluoren-9-yl)methyl (2-((2-(*tert*-butyl)phenyl)(2-(*tert*-butylamino)-2-oxo-1-phenylethyl)amino)-2-oxoethyl)carbamate, *anti*-1ab**

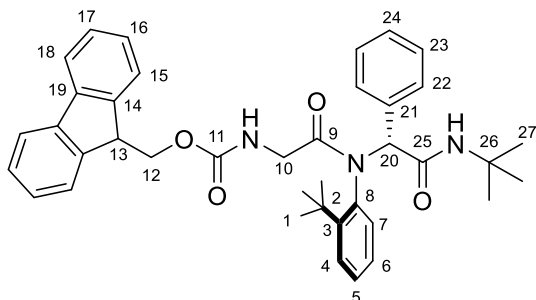

2-*tert*-Butylaniline (180 mg, 1.20 mmol, 1.0 eq.), Fmoc-glycine (357 mg, 1.20 mmol, 1.0 eq.), benzaldehyde (122  $\mu$ L, 1.20 mmol, 1.0 eq.), 2,2,2-trifluoroethanol (2.4 ml, 0.5 M) and *tert*-butyl isocyanide (136  $\mu$ L, 1.20 mmol, 1.0 eq.) were subjected to **General Procedure A**. Purification via column chromatography eluting with petrol 40-60/Et<sub>2</sub>O 65:35 afforded the title compound *anti*-**1ab** as a white solid (536 mg, 72% yield, >95:5 d.r.).

**<sup>1</sup>H NMR (300 MHz, CDCl<sub>3</sub>):**  $\delta_{\text{H}}$  7.83 (dd,  $J = 7.5, 2.0$  Hz, 1H, H<sub>Ar</sub>), 7.75 (d,  $J = 7.5$  Hz, 2H, H<sub>Ar</sub>), 7.63 – 7.55 (m, 4H, H<sub>22</sub> and H<sub>Ar</sub>), 7.50 (dd,  $J = 7.7, 2.0$  Hz, 1H, H<sub>Ar</sub>), 7.43 – 7.23 (m, 9H, H<sub>Ar</sub>), 5.70 (dd,  $J = 6.7, 2.7$  Hz, 1H, NH), 5.44 (s, 1H, NH), 4.97 (s, 1H, H<sub>20</sub>), 4.39 – 4.24 (m, 2H, H<sub>12</sub>), 4.19 (t,  $J = 7.2$  Hz, 1H, H<sub>13</sub>), 3.87 (dd,  $J = 17.9, 6.6$  Hz, 1H, H<sub>10</sub>), 3.55 (dd,  $J = 17.9, 2.7$  Hz, 1H, H<sub>10'</sub>), 1.28 (s, 9H, H<sub>27</sub>), 1.11 (s, 9H, H<sub>1</sub>).

**<sup>13</sup>C NMR (75 MHz, CDCl<sub>3</sub>):**  $\delta_{\text{C}}$  171.4, 167.8, 156.0, 147.0, 144.1, 141.4, 140.4, 136.4, 131.7, 130.7, 130.1, 129.2, 129.1, 128.2, 127.7, 127.2, 125.3, 120.0, 74.3, 67.1, 51.8, 47.3, 45.5, 36.3, 32.2, 28.7. N.B. The peak at 129.2 ppm corresponds to two overlapping signals.

**FTIR (cm<sup>-1</sup>):** 3311, 2954, 1714, 1673, 1539, 1273, 1242, 730.

**Melting Point (°C):** 175 – 176.

**HRMS (ESI):** Exact mass calculated for C<sub>39</sub>H<sub>44</sub>N<sub>3</sub>O<sub>4</sub><sup>+</sup> [M+H]<sup>+</sup>: 618.3326, found: 618.3336.  $\Delta = 1.6$  ppm.

***rac*-(*R*,*R*)-*tert*-butyl-(2-((2-(*tert*-butyl)phenyl)(2-(*tert*-butylamino)-2-oxo-1-phenylethyl)amino)-2-oxoethyl)carbamate, *anti*-1ac**

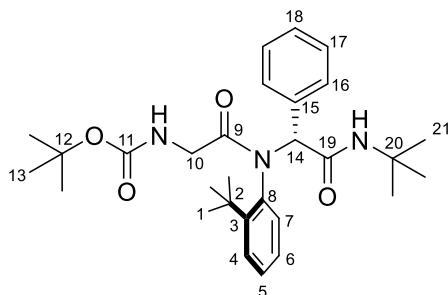

2-*tert*-Butylaniline (180 mg, 1.20 mmol, 1.0 eq.), N-Boc Glycine (210 mg, 1.20 mmol, 1.0 eq.), benzaldehyde (122  $\mu$ L, 1.20 mmol, 1.0 eq.), 2,2,2-trifluoroethanol (2.4 ml, 0.5 M) and *tert*-butyl isocyanide (136  $\mu$ L, 1.20 mmol, 1.0 eq.) were subjected to **General Procedure A**. Purification via column chromatography eluting with petrol 40-60/Et<sub>2</sub>O 80:20 afforded the title compound *anti*-1ac as a white solid (427 mg, 72% yield, >95:5 d.r.).

**<sup>1</sup>H NMR (300 MHz, CDCl<sub>3</sub>):**  $\delta_{\text{H}}$  7.67 (dd,  $J = 7.6, 1.9$  Hz, 1H, H<sub>7</sub>), 7.51 – 7.44 (m, 2H, H<sub>16</sub>), 7.42 – 7.35 (m, 1H, H<sub>4</sub>), 7.30 – 7.24 (m, 3H, H<sub>17</sub> and H<sub>18</sub>), 7.23 – 7.09 (m, 2H, H<sub>5</sub> and H<sub>6</sub>), 5.36 (s, 1H, NH), 5.31 (br s, 1H, NH), 4.88 (s, 1H, H<sub>14</sub>), 3.64 (dd,  $J = 18.0, 6.1$  Hz, 1H, H<sub>10</sub>), 3.40 (dd,  $J = 18.0, 2.9$  Hz, 1H, H<sub>10'</sub>), 1.30 (s, 9H, H<sub>13</sub>), 1.16 (s, 9H, H<sub>21</sub>), 1.02 (s, 9H, H<sub>1</sub>).

**<sup>13</sup>C NMR (75 MHz, CDCl<sub>3</sub>):**  $\delta_{\text{C}}$  171.9, 167.9, 155.5, 147.0, 140.4, 136.6, 131.8, 130.7, 129.9, 129.1, 129.1, 128.9, 128.1, 79.4, 74.0, 51.8, 45.2, 36.2, 32.1, 28.7, 28.4.

**FTIR (cm<sup>-1</sup>):** 3419, 2961, 1715, 1668, 1487, 1165, 765, 710.

**Melting Point (°C):** 163 – 165.

**HRMS (ESI):** Exact mass calculated for C<sub>29</sub>H<sub>42</sub>N<sub>3</sub>O<sub>4</sub><sup>+</sup> [M+H]<sup>+</sup>: 496.3170, found: 496.3188.  $\Delta = 3.6$  ppm.



***rac*-(*R*,*R*)-*N*-(*tert*-butyl)-2-(*N*-(2-(*tert*-butyl)phenyl)-2-(11-oxo-6,11-dihydrodibenzo[*b,e*]oxepin-2-yl)acetamido)-2-phenylacetamide, *anti*-1ad**

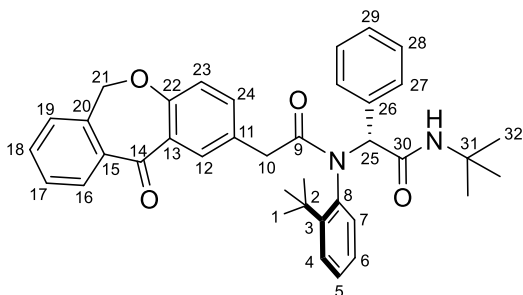

2-*tert*-Butylaniline (180 mg, 1.20 mmol, 1.0 eq.), isoxepac (322 mg, 1.20 mmol, 1.0 eq.), benzaldehyde (122  $\mu$ L, 1.20 mmol, 1.0 eq.), 2,2,2-trifluoroethanol (2.4 ml, 0.5 M) and *tert*-butyl isocyanide (136  $\mu$ L, 1.20 mmol, 1.0 eq.) were subjected to **General Procedure A**. Purification *via* column chromatography eluting with petrol 40-60/Et<sub>2</sub>O 70:30 afforded the title compound *anti*-1ad as a yellow solid (567 mg, 80% yield, >95:5 d.r.).

**<sup>1</sup>H NMR (400 MHz, CDCl<sub>3</sub>):**  $\delta$ <sub>H</sub> 7.86 (dd, *J* = 7.7, 1.5 Hz, 1H, H<sub>16</sub>), 7.80 (d, *J* = 2.3 Hz, 1H, H<sub>12</sub>), 7.66 (dd, *J* = 7.9, 1.6 Hz, 1H, H<sub>7</sub>), 7.59 – 7.49 (m, 4H, H<sub>4</sub>, H<sub>27</sub> and H<sub>Ar</sub>), 7.48 – 7.42 (m, 1H, H<sub>17</sub>), 7.41 (dd, *J* = 8.5, 2.4 Hz, 1H, H<sub>24</sub>), 7.37 – 7.29 (m, 5H, H<sub>5</sub>, H<sub>19</sub>, H<sub>28</sub> and H<sub>Ar</sub>), 7.23 – 7.18 (m, 1H, H<sub>6</sub>), 6.98 (d, *J* = 8.4 Hz, 1H, H<sub>23</sub>), 5.71 (s, 1H, NH), 5.16 (s, 2H, H<sub>21</sub>), 5.08 (s, 1H, H<sub>25</sub>), 3.40 (s, 2H, H<sub>10</sub>), 1.24 (s, 9H, H<sub>1</sub>), 1.23 (s, 9H, H<sub>32</sub>).

**<sup>13</sup>C NMR (101 MHz, CDCl<sub>3</sub>):**  $\delta$ <sub>C</sub> 190.9, 173.8, 168.6, 160.4, 146.8, 142.1, 140.7, 137.2, 136.8, 135.8, 132.7, 132.6, 130.3, 129.6, 129.5, 129.3, 129.0, 128.9, 128.8, 128.5, 127.9, 127.8, 124.9, 120.8, 73.7, 73.7, 51.6, 42.1, 36.3, 32.3, 28.6. N.B The peak at 132.7 ppm corresponds to two overlapping signals.

**FTIR (cm<sup>-1</sup>):** 3387, 3319, 2967, 1686, 1656, 1488, 1303, 1242, 759, 696.

**Melting Point (°C):** 159 – 161.

**HRMS (ESI):** Exact mass calculated for C<sub>38</sub>H<sub>41</sub>N<sub>2</sub>O<sub>4</sub><sup>+</sup> [M+H]<sup>+</sup>: 589.3061, found: 589.3072.  $\Delta$  = 1.9 ppm.

***rac*-(*R<sub>a</sub>*,*R*)-2-((1-benzyl-1H-indazol-3-yl)oxy)-N-(2-(*tert*-butyl)phenyl)-N-(2-(*tert*-butylamino)-2-oxo-1-phenylethyl)acetamide, *anti*-1ae**

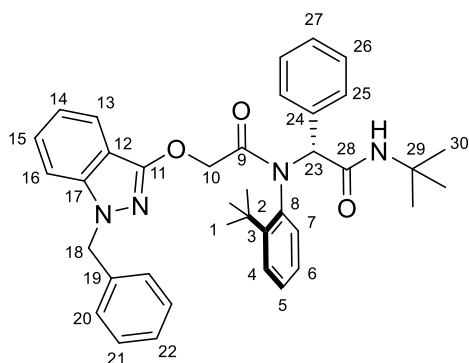

2-*tert*-Butylaniline (180 mg, 1.20 mmol, 1.0 eq.), benzadac (339 mg, 1.20 mmol, 1.0 eq.), benzaldehyde (122  $\mu$ L, 1.20 mmol, 1.0 eq.), 2,2,2-trifluoroethanol (2.4 ml, 0.5 M) and *tert*-butyl isocyanide (136  $\mu$ L, 1.20 mmol, 1.0 eq.) were subjected to **General Procedure A**. Purification *via* column chromatography eluting with petrol 40-60/Et<sub>2</sub>O 75:25 afforded the title compound *anti*-1ae as a white solid (522 mg, 72% yield, >95:5 d.r.).

**<sup>1</sup>H NMR (400 MHz, CDCl<sub>3</sub>):**  $\delta$ <sub>H</sub> 7.74 (d, *J* = 8.1 Hz, 1H, H<sub>13</sub>), 7.62 – 7.54 (m, 3H, H<sub>7</sub> and H<sub>25</sub>), 7.51 (dd, *J* = 8.2, 1.6 Hz, 1H, H<sub>4</sub>), 7.35 – 7.21 (m, 8H, H<sub>5</sub>, H<sub>15</sub>, H<sub>21</sub>, H<sub>22</sub>, H<sub>26</sub>, and H<sub>27</sub>), 7.17 (td, *J* = 7.5, 1.5 Hz, 1H, H<sub>6</sub>), 7.13 – 7.08 (m, 3H, H<sub>16</sub> and H<sub>20</sub>), 7.05 – 6.97 (m, 1H, H<sub>14</sub>), 5.79 (s, 1H, NH), 5.30 (s, 2H, H<sub>18</sub>), 5.27 (s, 1H, H<sub>23</sub>), 4.79 (d, *J* = 15.5 Hz, 1H, H<sub>10</sub>), 4.59 (d, *J* = 15.6 Hz, 1H, H<sub>10'</sub>), 1.26 (s, 9H, H<sub>30</sub>), 1.25 (s, 9H, H<sub>1</sub>).

**<sup>13</sup>C NMR (101 MHz, CDCl<sub>3</sub>):** 170.5, 168.0, 155.2, 147.6, 141.8, 139.2, 137.6, 136.5, 132.4, 130.5, 130.2, 129.0, 128.8, 128.6, 128.6, 127.6, 127.5, 127.4, 127.1, 120.7, 119.3, 112.9, 108.8, 72.1, 68.0, 52.4, 51.6, 36.5, 32.4, 28.7.

**FTIR (cm<sup>-1</sup>):** 3329, 2981, 2909, 1689, 1644, 1529, 756, 700.

**Melting Point (°C):** 162 – 164.

**HRMS (ESI):** Exact mass calculated for C<sub>38</sub>H<sub>43</sub>N<sub>4</sub>O<sub>3</sub><sup>+</sup> [M+H]<sup>+</sup>: 603.3330, found: 603.3326.  $\Delta$  = – 0.7 ppm.

***rac*-(*R<sub>a</sub>,R<sub>b</sub>*)-*N*-(*tert*-butyl)-2-(*N*-(2-(*tert*-butyl)phenyl)-2-(1-methyl-5-(4-methylbenzoyl)-1*H*-pyrrol-2-yl)acetamido)-2-phenylacetamide, *anti*-1af**

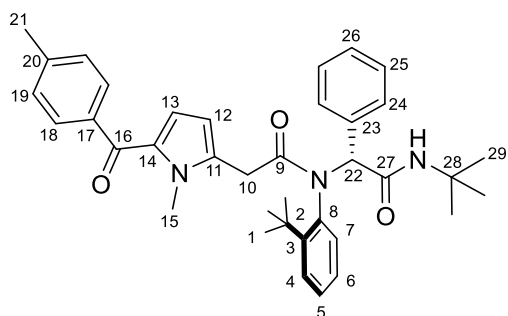

2-*tert*-Butylaniline (180 mg, 1.20 mmol, 1.0 eq.), tolmetin (309 mg, 1.20 mmol, 1.0 eq.), benzaldehyde (122  $\mu$ L, 1.20 mmol, 1.0 eq.), 2,2,2-trifluoroethanol (2.4 ml, 0.5 M) and *tert*-butyl isocyanide (136  $\mu$ L, 1.20 mmol, 1.0 eq.) were subjected to **General Procedure A**. Purification *via* column chromatography eluting with petrol 40-60/Et<sub>2</sub>O 70:30 afforded the title compound *anti*-1af as a white solid (540 mg, 78% yield, >95:5 d.r.).

**<sup>1</sup>H NMR (400 MHz, CDCl<sub>3</sub>):**  $\delta$ <sub>H</sub> 8.08 – 8.00 (m, 1H, H<sub>7</sub>), 7.72 – 7.68 (m, 2H, H<sub>18</sub>), 7.64 – 7.56 (m, 2H, H<sub>24</sub>), 7.54 – 7.49 (m, 1H, H<sub>4</sub>), 7.40 – 7.27 (m, 5H, H<sub>5</sub>, H<sub>6</sub>, H<sub>25</sub> and H<sub>26</sub>), 7.22 (d, *J* = 7.9 Hz, 2H, H<sub>19</sub>), 6.63 (d, *J* = 4.0 Hz, 1H, H<sub>13</sub>), 5.93 (d, *J* = 4.0 Hz, 1H, H<sub>12</sub>), 5.48 (s, 1H, NH), 4.94 (s, 1H, H<sub>22</sub>), 3.86 (s, 3H, H<sub>15</sub>), 3.42 (s, 2H, H<sub>10</sub>), 2.41 (s, 3H, H<sub>21</sub>), 1.26 (s, 9H, H<sub>29</sub>), 1.16 (s, 9H, H<sub>1</sub>).

**<sup>13</sup>C NMR (101 MHz, CDCl<sub>3</sub>):**  $\delta$ <sub>C</sub> 185.8, 172.0, 168.4, 146.8, 142.7, 141.6, 137.8, 136.7, 136.1, 132.1, 131.3, 130.8, 129.6, 129.5, 129.1, 128.9, 128.9, 128.7, 128.3, 122.5, 109.2, 74.9, 51.8, 36.2, 35.4, 33.6, 32.2, 28.6, 21.6.

**FTIR (cm<sup>-1</sup>):** 2970, 1669, 1623, 1482, 1455, 1267, 881, 748, 705.

**Melting Point (°C):** 178 – 180.

**HRMS (ESI):** Exact mass calculated for C<sub>37</sub>H<sub>44</sub>N<sub>3</sub>O<sub>3</sub><sup>+</sup> [M+H]<sup>+</sup>: 578.3377, found: 578.3394.  $\Delta$  = 2.9 ppm.

***rac-(R<sub>a</sub>,R)*-N-(*tert*-butyl)-2-(N-(2-(*tert*-butyl)phenyl)-2-(1-(4-chlorobenzoyl)-5-methoxy-2-methyl-1H-indol-3-yl)acetamido)-2-phenylacetamide, *anti*-1ag**

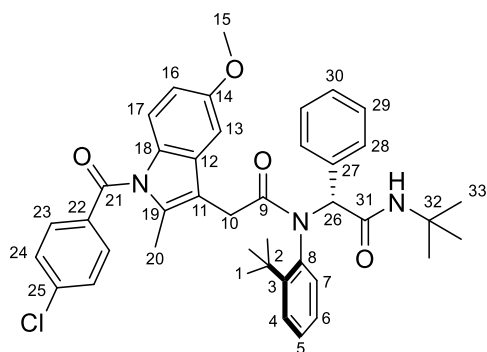

2-*tert*-Butylaniline (180 mg, 1.20 mmol, 1.0 eq.), indomethacin (429 mg, 1.20 mmol, 1.0 eq.), benzaldehyde (122  $\mu$ L, 1.20 mmol, 1.0 eq.), 2,2,2-trifluoroethanol (2.4 ml, 0.5 M) and *tert*-butyl isocyanide (136  $\mu$ L, 1.20 mmol, 1.0 eq.) were subjected to **General Procedure A**. Purification *via* column chromatography eluting with dichloromethane/Et<sub>2</sub>O 98:2 afforded the title compound *anti*-1ag as a yellow solid (571 mg, 70% yield, >95:5 d.r.).

**<sup>1</sup>H NMR (400 MHz, CDCl<sub>3</sub>):**  $\delta$ <sub>H</sub> 7.90 (dd, *J* = 7.8, 1.8 Hz, 1H, H<sub>7</sub>), 7.58 (d, *J* = 8.5 Hz, 2H, H<sub>23</sub>), 7.54 – 7.45 (m, 3H, H<sub>4</sub> and H<sub>28</sub>), 7.37 (d, *J* = 8.5 Hz, 2H, H<sub>24</sub>), 7.23 (m, 5H, H<sub>5</sub>, H<sub>6</sub>, H<sub>29</sub> and H<sub>30</sub>), 6.85 (d, *J* = 2.5 Hz, 1H, H<sub>13</sub>), 6.81 (d, *J* = 9.0 Hz, 1H, H<sub>17</sub>), 6.55 (dd, *J* = 9.0, 2.5 Hz, 1H, H<sub>16</sub>), 5.39 (s, 1H, NH), 4.95 (s, 1H, H<sub>26</sub>), 3.77 (s, 3H, H<sub>15</sub>), 3.39 (d, *J* = 17.4 Hz, 1H, H<sub>10</sub>), 3.30 (d, *J* = 17.4 Hz, 1H, H<sub>10'</sub>), 2.07 (s, 3H, H<sub>20</sub>), 1.17 (s, 9H, H<sub>1</sub>), 1.14 (s, 9H, H<sub>33</sub>).

**<sup>13</sup>C NMR (101 MHz, CDCl<sub>3</sub>):**  $\delta$ <sub>C</sub> 172.7, 168.4, 168.3, 156.1, 147.1, 142.3, 139.0, 136.9, 136.0, 134.4, 132.5, 131.4, 131.3, 131.0, 130.8, 130.0, 129.1, 129.0, 128.8, 128.7, 128.1, 114.9, 114.0, 111.8, 102.0, 74.4, 55.8, 51.6, 36.4, 33.0, 32.5, 28.6, 13.8.

**FTIR (cm<sup>-1</sup>):** 2981, 1670, 1476, 1363, 1220, 909, 728.

**Melting Point (°C):** 105 – 113.

**HRMS (ESI):** Exact mass calculated for C<sub>41</sub>H<sub>45</sub>ClN<sub>3</sub>O<sub>4</sub><sup>+</sup> [M+H]<sup>+</sup>: 678.3093, found: 678.3094.  $\Delta$  = 0.1 ppm.

***rac*-(*R<sub>a</sub>,R*)-N-(2-(benzylamino)-2-oxo-1-phenylethyl)-N-(2-(*tert*-butyl)phenyl)benzamide, *anti*-1ah**

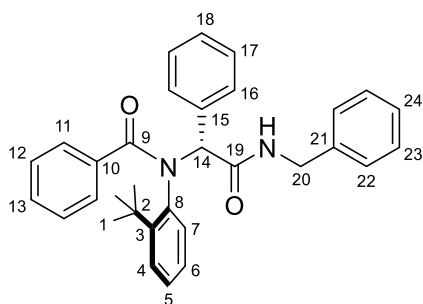

2-*tert*-Butylaniline (180 mg, 1.20 mmol, 1.0 eq.), benzoic acid (147 mg, 1.20 mmol, 1.0 eq.), benzaldehyde (122  $\mu$ L, 1.20 mmol, 1.0 eq.), 2,2,2-trifluoroethanol (2.4 ml, 0.5 M) and benzyl isocyanide (146  $\mu$ L, 1.20 mmol, 1.0 eq.) were subjected to **General Procedure A**. Purification via column chromatography eluting with petrol 40-60/Et<sub>2</sub>O 75:25 afforded the title compound *anti*-1ah as a white solid (422 mg, 74% yield, >95:5 d.r.).

**<sup>1</sup>H NMR (300 MHz, CDCl<sub>3</sub>):**  $\delta_{\text{H}}$  8.08 – 8.02 (m, 1H, H<sub>7</sub>), 7.80 – 7.73 (m, 2H, H<sub>16</sub>), 7.42 – 7.35 (m, 3H, H<sub>17</sub> and H<sub>18</sub>), 7.34 – 7.15 (m, 11H, H<sub>4</sub>, H<sub>5</sub>, H<sub>6</sub>, H<sub>11</sub>, H<sub>13</sub>, H<sub>22</sub>, H<sub>23</sub> and H<sub>24</sub>), 7.13 – 7.05 (m, 2H, H<sub>12</sub>), 6.12 (t, *J* = 5.8 Hz, 1H, NH), 5.38 (s, 1H, H<sub>14</sub>), 4.61 (dd, *J* = 15.1, 6.1 Hz, 1H, H<sub>20</sub>), 4.45 (dd, *J* = 15.1, 5.5 Hz, 1H, H<sub>20'</sub>), 0.79 (s, 9H, H<sub>1</sub>).

**<sup>13</sup>C NMR (75 MHz, CDCl<sub>3</sub>):**  $\delta_{\text{C}}$  170.7, 169.1, 146.7, 141.8, 138.2, 136.3, 135.8, 132.2, 131.4, 130.7, 129.8, 129.7, 129.3, 129.2, 128.7, 128.0, 127.6, 127.4, 127.2, 75.1, 44.1, 36.2, 32.2. N.B. The peak at 127.4 ppm corresponds to two overlapping signals.

**FTIR (cm<sup>-1</sup>):** 3311, 2966, 1691, 1616, 1546, 1344, 695, 643.

**Melting Point (°C):** 127 – 128.

**HRMS (ESI):** Exact mass calculated for C<sub>32</sub>H<sub>33</sub>N<sub>2</sub>O<sub>2</sub><sup>+</sup> [M+H]<sup>+</sup>: 477.2537, found: 477.2545.  $\Delta$  = 1.7 ppm.

***rac*-(*R<sub>a</sub>,R*)-*N*-(2-(*tert*-butyl)phenyl)-*N*-(2-(cyclohexylamino)-2-oxo-1-phenylethyl)benzamide, *anti*-1ai**

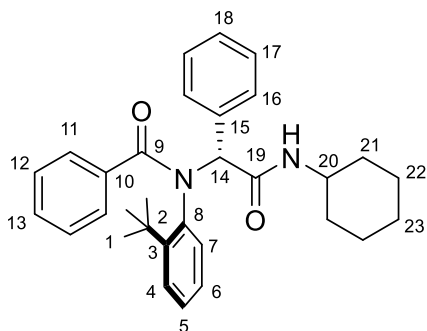

2-*tert*-Butylaniline (180 mg, 1.20 mmol, 1.0 eq.), benzoic acid (147 mg, 1.20 mmol, 1.0 eq.), benzaldehyde (122  $\mu$ L, 1.20 mmol, 1.0 eq.), 2,2,2-trifluoroethanol (2.4 ml, 0.5 M) and cyclohexyl isocyanide (149  $\mu$ L, 1.20 mmol, 1.0 eq.) were subjected to **General Procedure A**. Purification via column chromatography eluting with petrol 40-60/Et<sub>2</sub>O 80:20 afforded the title compound *anti*-1ai as a pale yellow solid (400 mg, 71% yield, >95:5 d.r.).

**<sup>1</sup>H NMR (300 MHz, CDCl<sub>3</sub>):**  $\delta_{\text{H}}$  8.03 (dd,  $J = 7.9, 2.0$  Hz, 1H, H<sub>7</sub>), 7.77 – 7.69 (m, 2H, H<sub>16</sub>), 7.46 – 7.37 (m, 3H, H<sub>17</sub> and H<sub>18</sub>), 7.31 – 7.14 (m, 6H, H<sub>4</sub>, H<sub>5</sub>, H<sub>6</sub>, H<sub>11</sub> and H<sub>13</sub>), 7.13 – 7.04 (m, 2H, H<sub>12</sub>), 5.68 (d,  $J = 8.2$  Hz, 1H, NH), 5.34 (s, 1H, H<sub>14</sub>), 3.93 – 3.79 (m, 1H, H<sub>20</sub>), 2.00 – 1.89 (m, 1H, H<sub>Cy</sub>), 1.88 – 1.78 (m, 1H, H<sub>Cy</sub>), 1.63 – 0.90 (m, 8H, H<sub>Cy</sub>), 0.79 (s, 9H, H<sub>1</sub>).

**<sup>13</sup>C NMR (75 MHz, CDCl<sub>3</sub>):**  $\delta_{\text{C}}$  170.7, 168.1, 146.7, 141.8, 136.5, 136.2, 132.2, 131.3, 130.6, 129.8, 129.6, 129.2, 129.1, 128.0, 127.3, 127.0, 74.8, 48.9, 36.2, 32.9, 32.8, 32.2, 25.6, 24.9, 24.8.

**FTIR (cm<sup>-1</sup>):** 3299, 2929, 2853, 1686, 1610, 1570, 1352, 715, 700.

**Melting Point (°C):** 123 – 125.

**HRMS (ESI):** Exact mass calculated for C<sub>31</sub>H<sub>37</sub>N<sub>2</sub>O<sub>2</sub><sup>+</sup> [M+H]<sup>+</sup>: 469.2850, found: 469.2841.  $\Delta = -1.9$  ppm.

***rac*-(*R*,*R*)-Ethyl (2-(*N*-(2-(*tert*-butyl)phenyl)benzamido)-2-phenylacetyl)glycinate, *anti*-1aj**

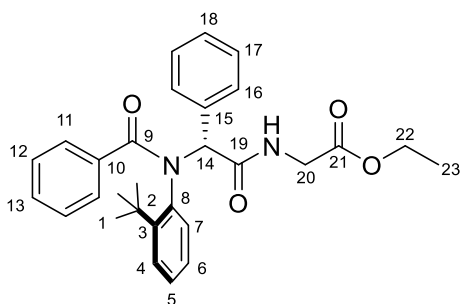

2-*tert*-Butylaniline (180 mg, 1.20 mmol, 1.0 eq.), benzoic acid (147 mg, 1.20 mmol, 1.0 eq.), benzaldehyde (122  $\mu$ L, 1.20 mmol, 1.0 eq.), 2,2,2-trifluoroethanol (2.4 ml, 0.5 M) and ethyl isocyanoacetate (131  $\mu$ L, 1.20 mmol, 1.0 eq.) were subjected to **General Procedure A**. Purification via column chromatography eluting with petrol 40-60/Et<sub>2</sub>O 60:40 afforded the title compound *anti*-1aj as a pale yellow solid (415 mg, 73% yield, >95:5 d.r.).

**<sup>1</sup>H NMR (300 MHz, CDCl<sub>3</sub>):**  $\delta$ <sub>H</sub> 8.06 – 8.00 (m, 1H, H<sub>7</sub>), 7.81 – 7.74 (m, 2H, H<sub>16</sub>), 7.46 – 7.37 (m, 3H, H<sub>17</sub> and H<sub>18</sub>), 7.33 – 7.13 (m, 6H, H<sub>4</sub>, H<sub>5</sub>, H<sub>6</sub>, H<sub>11</sub> and H<sub>13</sub>), 7.13 – 7.03 (m, 2H, H<sub>12</sub>), 6.34 (t, *J* = 5.1 Hz, 1H, NH), 5.34 (s, 1H, H<sub>14</sub>), 4.21 – 4.10 (m, 3H, H<sub>20</sub> and H<sub>22</sub>), 4.03 (dd, *J* = 18.4, 4.8 Hz, 1H, H<sub>20'</sub>), 1.24 (t, *J* = 7.1 Hz, 3H, H<sub>23</sub>), 0.78 (s, 9H, H<sub>1</sub>).

**<sup>13</sup>C NMR (75 MHz, CDCl<sub>3</sub>):**  $\delta$ <sub>C</sub> 170.6, 169.7, 169.3, 146.7, 141.8, 136.2, 135.5, 132.0, 131.4, 130.6, 129.8, 129.3, 129.3, 128.1, 127.4, 127.3, 75.0, 61.6, 42.0, 36.1, 32.2, 14.2. N.B. The peak at 129.8 ppm corresponds to two overlapping signals.

**FTIR (cm<sup>-1</sup>):** 3363, 2957, 1727, 1689, 1626, 1324, 1204, 719, 693.

**Melting Point (°C):** 122 – 124.

**HRMS (ESI):** Exact mass calculated for C<sub>29</sub>H<sub>33</sub>N<sub>2</sub>O<sub>4</sub><sup>+</sup> [M+H]<sup>+</sup>: 473.2435, found: 473.2436.  $\Delta$  = 0.2 ppm.

***rac*-(*R*,*R*)-ethyl (2-(2-(((9*H*-fluoren-9-yl)methoxy)carbonyl)amino)-*N*-(2-(*tert*-butyl)phenyl)acetamido)-2-phenylacetyl)glycinate, *anti*-1ak**

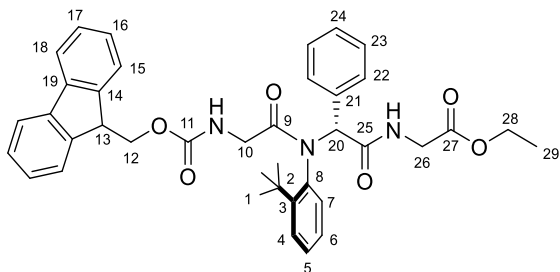

2-*tert*-Butylaniline (180 mg, 1.20 mmol, 1.0 eq.), Fmoc-Glycine (357 mg, 1.20 mmol, 1.0 eq.), benzaldehyde (122  $\mu$ L, 1.20 mmol, 1.0 eq.), 2,2,2-trifluoroethanol (2.4 ml, 0.5 M) and ethyl isocyanoacetate (131  $\mu$ L, 1.20 mmol, 1.0 eq.) were subjected to **General Procedure A**. Purification via column chromatography eluting with petrol 40-60/Et<sub>2</sub>O 40:60 afforded the title compound *anti*-1ak as a white solid (530 mg, 68% yield, >95:5 d.r.).

**<sup>1</sup>H NMR (300 MHz, CDCl<sub>3</sub>):**  $\delta_{\text{H}}$  7.96 – 7.90 (m, 1H, H<sub>7</sub>), 7.75 (d,  $J$  = 7.5 Hz, 2H, H<sub>Ar</sub>), 7.69 – 7.64 (m, 2H, H<sub>22</sub>), 7.62 – 7.56 (m, 2H, H<sub>Ar</sub>), 7.51 (dd,  $J$  = 7.1, 2.5 Hz, 1H, H<sub>4</sub>), 7.45 – 7.24 (m, 9H, H<sub>5</sub>, H<sub>6</sub>, H<sub>23</sub>, H<sub>24</sub> and H<sub>Ar</sub>), 6.10 (t,  $J$  = 5.0 Hz, 1H, NH), 5.69 (m, 1H, NH), 4.97 (s, 1H, H<sub>20</sub>), 4.40 – 4.24 (m, 2H, H<sub>12</sub>), 4.23 – 3.80 (m, 6H, H<sub>10</sub>, H<sub>13</sub>, H<sub>26</sub> and H<sub>28</sub>), 3.58 (dd,  $J$  = 18.0, 2.7 Hz, 1H, H<sub>10'</sub>), 1.24 (t,  $J$  = 7.1 Hz, 3H, H<sub>29</sub>), 1.09 (s, 9H, H<sub>1</sub>).

**<sup>13</sup>C NMR (75 MHz, CDCl<sub>3</sub>):**  $\delta_{\text{C}}$  171.8, 169.5, 169.1, 156.0, 146.9, 144.0, 141.4, 140.7, 135.4, 131.4, 131.1, 130.0, 129.5, 129.4, 129.4, 128.6, 127.8, 127.2, 125.3, 120.0, 76.7, 67.1, 61.7, 47.2, 45.5, 42.0, 36.2, 32.1, 14.2.

**FTIR (cm<sup>-1</sup>):** 3294, 2951, 1756, 1674, 1546, 1199, 734.

**Melting Point (°C):** 142 – 144.

**HRMS (ESI):** Exact mass calculated for C<sub>39</sub>H<sub>42</sub>N<sub>3</sub>O<sub>6</sub><sup>+</sup> [M+H]<sup>+</sup>: 648.3068, found: 648.3079.  $\Delta$  = 1.7 ppm.



**N-(2-(*tert*-butyl)phenyl)-N-((*R*, *R*)-2-oxo-1-phenyl-2-(((*S*)-1-phenylethyl)amino)ethyl)benzamide & N-(2-(*tert*-butyl)phenyl)-N-((*S*, *S*)-2-oxo-1-phenyl-2-(((*S*)-1-phenylethyl)amino)ethyl)benzamide, *anti*-1a1**

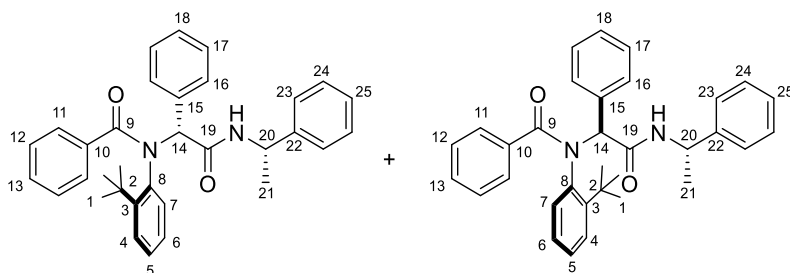

2-*tert*-Butylaniline (180 mg, 1.20 mmol, 1.0 eq.), benzoic acid (147 mg, 1.20 mmol, 1.0 eq.), benzaldehyde (122  $\mu$ L, 1.20 mmol, 1.0 eq.), 2,2,2-trifluoroethanol (2.4 ml, 0.5 M) and (*S*)-(-)- $\alpha$ -methylbenzyl isocyanide (162  $\mu$ L, 1.20 mmol, 1.0 eq.) were subjected to **General Procedure A**. Purification via column chromatography eluting with petrol 40-60/Et<sub>2</sub>O 80:20 afforded the title compound *anti*-1a1 as a white solid (420 mg, 71% yield, 53:47 d.r.). A 30 mg analytical sample of this mixture was further purified using preparative TLC (dichloromethane/Et<sub>2</sub>O 98:2) to yield 13 mg of each diastereoisomer (both >95:5 d.r.).

Diastereoisomer 1:

R<sub>f</sub> (dichloromethane/Et<sub>2</sub>O 98:2): 0.54.

<sup>1</sup>H NMR (400 MHz, CDCl<sub>3</sub>):  $\delta$ <sub>H</sub> 7.84 – 7.78 (m, 1H, H<sub>7</sub>), 7.74 – 7.68 (m, 2H, H<sub>16</sub>), 7.41 – 7.34 (m, 3H, H<sub>17</sub> and H<sub>18</sub>), 7.34 – 7.25 (m, 7H, H<sub>4</sub>, H<sub>11</sub>, H<sub>23</sub> and H<sub>Ar</sub>), 7.25 – 7.15 (m, 4H, H<sub>6</sub> and H<sub>Ar</sub>), 7.09 (dd, *J* = 8.3, 6.9 Hz, 2H, H<sub>12</sub>), 6.18 (d, *J* = 7.9 Hz, 1H, NH), 5.44 (s, 1H, H<sub>14</sub>), 5.23 (p, *J* = 7.1 Hz, 1H, H<sub>20</sub>), 1.43 (d, *J* = 6.9 Hz, 3H, H<sub>21</sub>), 0.85 (s, 9H, H<sub>1</sub>).

<sup>13</sup>C NMR (101 MHz, CDCl<sub>3</sub>):  $\delta$ <sub>C</sub> 170.8, 168.2, 146.7, 142.8, 141.5, 136.4, 135.8, 132.3, 131.1, 130.7, 129.8, 129.7, 129.1, 129.0, 128.7, 128.0, 127.4, 127.3, 127.0, 126.3, 74.5, 49.1, 36.2, 32.3, 21.5.

FTIR (cm<sup>-1</sup>): 3324, 3062, 2962, 2927, 1679, 1616, 1491, 729, 697.

HRMS (ESI): Exact mass calculated for C<sub>33</sub>H<sub>35</sub>N<sub>2</sub>O<sub>2</sub><sup>+</sup> [M+H]<sup>+</sup>: 491.2693, found: 491.2679.  $\Delta$  = -2.8 ppm.

[ $\alpha$ ]<sub>D</sub><sup>20</sup>: -126.2 (c = 0.01, CHCl<sub>3</sub>).

Diastereoisomer 2:

R<sub>f</sub> (dichloromethane/Et<sub>2</sub>O 98:2): 0.46.

**<sup>1</sup>H NMR (400 MHz, CDCl<sub>3</sub>):** δ<sub>H</sub> 8.00 (dd, *J* = 7.5, 1.9 Hz, 1H, H<sub>7</sub>), 7.78 – 7.70 (m, 2H, H<sub>16</sub>), 7.47 – 7.35 (m, 3H, H<sub>17</sub> and H<sub>18</sub>), 7.32 – 7.15 (m, 11H, H<sub>4</sub>, H<sub>5</sub>, H<sub>6</sub>, H<sub>11</sub>, H<sub>13</sub>, H<sub>23</sub>, H<sub>24</sub> and H<sub>25</sub>), 7.09 (dd, *J* = 8.3, 7.0 Hz, 2H, H<sub>12</sub>), 6.04 (d, *J* = 7.9 Hz, 1H, NH), 5.36 (s, 1H, H<sub>14</sub>), 5.20 (p, *J* = 7.1 Hz, 1H, H<sub>20</sub>), 1.44 (d, *J* = 7.0 Hz, 3H, H<sub>21</sub>), 0.77 (s, 9H, H<sub>1</sub>).

**<sup>13</sup>C NMR (101 MHz, CDCl<sub>3</sub>):** δ<sub>C</sub> 170.8, 168.2, 146.8, 143.4, 141.6, 136.4, 136.0, 132.3, 131.2, 130.7, 129.8, 129.7, 129.3, 129.2, 128.7, 128.0, 127.4, 127.3, 127.1, 126.1, 74.7, 49.5, 36.2, 32.2, 22.2.

**FTIR (cm<sup>-1</sup>):** 3426, 3304, 3062, 2966, 1680, 1616, 1490, 728, 697.

**HRMS (ESI):** Exact mass calculated for C<sub>33</sub>H<sub>35</sub>N<sub>2</sub>O<sub>2</sub><sup>+</sup> [M+H]<sup>+</sup>: 491.2693, found: 491.2688. Δ = -1.0 ppm.

**[α]<sub>D</sub><sup>20</sup>:** +161.0 (c = 0.01, CHCl<sub>3</sub>).

***rac*-(*R<sub>a</sub>*,*R*)-N-(2-(*tert*-butylamino)-2-oxo-1-phenylethyl)-N-(2-iodo-4,6-dimethylphenyl)benzamide, *anti*-1am**

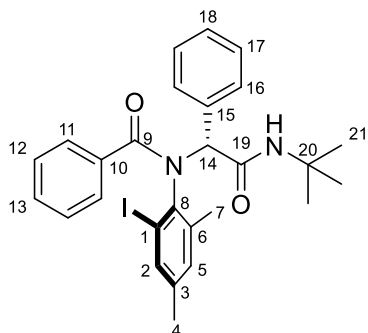

Synthesised according to a modification to **General Procedure A**. A round bottomed flask equipped with a stirrer bar, was sequentially charged with 2-iodo-4,6-dimethylaniline (75 mg, 0.30 mmol, 1.0 eq.), benzoic acid (37 mg, 0.30 mmol, 1.0 eq.), benzaldehyde (31  $\mu$ L, 0.30 mmol, 1.0 eq.), 2,2,2-trifluoroethanol (0.6 mL, 0.5 M) and *tert*-butyl isocyanide (34  $\mu$ L, 0.30 mmol, 1.0 eq.). The resulting mixture was stirred at room temperature for 24 hours. After this time a further portion of *tert*-butyl isocyanide (34  $\mu$ L, 0.30 mmol, 1.0 eq.) was charged and the mixture was stirred for a further 24 hours. The reaction mixture was concentrated to dryness, followed by addition of EtOAc and saturated aqueous Na<sub>2</sub>CO<sub>3</sub>. The layers were separated, and the aqueous layer was extracted twice with EtOAc. The combined organic extracts were dried over MgSO<sub>4</sub>, filtered and the resulting solution was concentrated. Purification via column chromatography eluting with petrol 40-60/Et<sub>2</sub>O 70:30 afforded the title compound *anti*-1am as a white solid (114 mg, 70% yield, >95:5 d.r.).

**<sup>1</sup>H NMR (300 MHz, CDCl<sub>3</sub>):**  $\delta_{\text{H}}$  7.57 – 7.50 (m, 4H, H<sub>11</sub> and H<sub>16</sub>), 7.38 – 7.35 (m, 1H, H<sub>2</sub>), 7.31 – 7.23 (m, 4H, H<sub>13</sub>, H<sub>17</sub> and H<sub>18</sub>), 7.22 – 7.14 (m, 2H, H<sub>12</sub>), 6.98 (s, 1H, NH), 6.83 – 6.78 (m, 1H, H<sub>5</sub>), 5.19 (s, 1H, H<sub>14</sub>), 2.37 (s, 3H, H<sub>7</sub>), 2.13 (s, 3H, H<sub>4</sub>), 1.38 (s, 9H, H<sub>21</sub>).

**<sup>13</sup>C NMR (75 MHz, CDCl<sub>3</sub>):**  $\delta_{\text{C}}$  171.7, 168.1, 141.3, 139.6, 139.1, 138.5, 135.8, 134.6, 132.7, 130.6, 130.1, 128.7, 128.2, 128.1, 127.6, 101.9, 71.9, 51.6, 28.8, 20.3, 20.0.

**FTIR (cm<sup>-1</sup>):** 3338, 2964, 2924, 1686, 1634, 1546, 1338, 717, 698, 585.

**Melting Point (°C):** 133 – 135.

**HRMS (ESI):** Exact mass calculated for C<sub>27</sub>H<sub>30</sub>IN<sub>2</sub>O<sub>2</sub><sup>+</sup> [M+H]<sup>+</sup>: 541.1347, found: 541.1345.  $\Delta$  = -0.4 ppm.

***rac*-(*R<sub>a</sub>,R*)-N-(2-(*tert*-butylamino)-2-oxo-1-phenylethyl)-N-(2-iodo-4,6-dimethylphenyl)-3-phenylpropanamide, *anti*-1an**

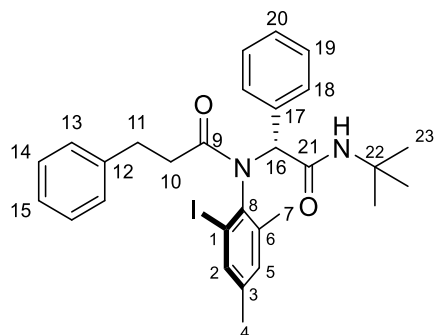

Synthesised according to a modification to **General Procedure A**. A round bottomed flask equipped with a stirrer bar, was sequentially charged with 2-iodo-4,6-dimethylaniline (75 mg, 0.30 mmol, 1.0 eq.), hydrocinnamic acid (46 mg, 0.30 mmol, 1.0 eq.), benzaldehyde (31  $\mu$ L, 0.30 mmol, 1.0 eq.), 2,2,2-trifluoroethanol (0.6 mL, 0.5 M) and *tert*-butyl isocyanide (34  $\mu$ L, 0.30 mmol, 1.0 eq.). The resulting mixture was stirred at room temperature for 24 hours. After this time a further portion of *tert*-butyl isocyanide (34  $\mu$ L, 0.30 mmol, 1.0 eq.) was charged and the mixture was stirred for a further 24 hours. The reaction mixture was concentrated to dryness, followed by addition of EtOAc and saturated aqueous Na<sub>2</sub>CO<sub>3</sub>. The layers were separated, and the aqueous layer was extracted twice with EtOAc. The combined organic extracts were dried over MgSO<sub>4</sub>, filtered and the resulting solution was concentrated. Purification via column chromatography eluting with petrol 40-60/Et<sub>2</sub>O 70:30 afforded the title compound *anti*-1an as an off-white solid (124 mg, 73% yield, >95:5 d.r.).

**<sup>1</sup>H NMR (400 MHz, CDCl<sub>3</sub>)**  $\delta_{\text{H}}$  7.49 – 7.47 (m, 1H, H<sub>2</sub>), 7.36 – 7.33 (m, 2H, H<sub>18</sub>), 7.25 – 7.21 (m, 2H, H<sub>14</sub>), 7.19 – 7.12 (m, 6H, H<sub>13</sub>, H<sub>15</sub>, H<sub>19</sub>, H<sub>20</sub>), 6.80 – 6.77 (m, 1H, H<sub>5</sub>), 6.76 (s, 1H, NH), 5.27 (s, 1H, H<sub>16</sub>), 3.02 – 2.94 (m, 2H, H<sub>11</sub> + H<sub>11'</sub>), 2.44 (ddd, *J* = 16.5, 8.4, 7.0 Hz, 1H, H<sub>10</sub>), 2.20 – 2.08 (m, 4H, H<sub>4</sub>, H<sub>10'</sub>), 2.01 (s, 3H, H<sub>7</sub>), 1.33 (s, 9H, H<sub>23</sub>).

**<sup>13</sup>C NMR (75 MHz, CDCl<sub>3</sub>)**  $\delta_{\text{C}}$  173.9, 167.9, 141.3, 140.2, 139.6, 138.9, 138.6, 134.5, 132.6, 130.7, 128.8, 128.5, 128.4, 128.0, 126.2, 103.4, 69.6, 51.6, 37.4, 31.2, 28.8, 20.4, 19.8.

**FTIR (cm<sup>-1</sup>):** 3390, 2966, 2924, 1671, 1517, 1496, 1453, 1226, 699.

**Melting point (°C):** 144 – 146.

**HRMS (ESI):** Exact mass calculated for C<sub>29</sub>H<sub>34</sub>I<sub>2</sub>N<sub>2</sub>O<sub>2</sub><sup>+</sup> [M+H]<sup>+</sup> 569.1659, found 569.1665.  $\Delta$  = 1.1 ppm.

***rac*-(*R<sub>a</sub>,R<sub>b</sub>*)-*N*-(2-(*tert*-butylamino)-2-oxo-1-(*m*-tolyl)ethyl)-*N*-(2-iodo-4,6-dimethylphenyl)benzamide, *anti*-1a0**

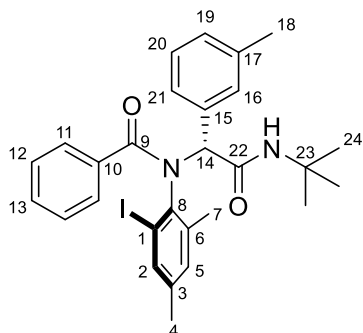

Synthesised according to a modification to **General Procedure A**. A round bottomed flask equipped with a stirrer bar, was sequentially charged with 2-iodo-4,6-dimethylaniline (75 mg, 0.30 mmol, 1.0 eq.), benzoic acid (37 mg, 0.30 mmol, 1.0 eq.), 3-methylbenzaldehyde (35  $\mu$ L, 0.30 mmol, 1.0 eq.), 2,2,2-trifluoroethanol (0.6 mL, 0.5 M) and *tert*-butyl isocyanide (34  $\mu$ L, 0.30 mmol, 1.0 eq.). The resulting mixture was stirred at room temperature for 24 hours. After this time a further portion of *tert*-butyl isocyanide (34  $\mu$ L, 0.30 mmol, 1.0 eq.) was charged and the mixture was stirred for a further 24 hours. The reaction mixture was concentrated to dryness, followed by addition of EtOAc and saturated aqueous  $\text{Na}_2\text{CO}_3$ . The layers were separated, and the aqueous layer was extracted twice with EtOAc. The combined organic extracts were dried over  $\text{MgSO}_4$ , filtered and the resulting solution was concentrated. Purification via column chromatography eluting with petrol 40-60/ $\text{Et}_2\text{O}$  70:30 afforded the title compound *anti*-**1a0** as a white solid (129 mg, 78% yield, >95:5 d.r.).

**$^1\text{H}$  NMR (400 MHz,  $\text{CDCl}_3$ )**  $\delta_{\text{H}}$  7.56 – 7.51 (m, 2H,  $\text{H}_{11}$ ), 7.38 – 7.36 (m, 1H,  $\text{H}_2$ ), 7.35 – 7.27 (m, 3H,  $\text{H}_{13}$ ,  $\text{H}_{20}$ ,  $\text{H}_{21}$ ), 7.20 – 7.11 (m, 3H,  $\text{H}_{16}$  and  $\text{H}_{12}$ ), 7.08 – 7.04 (m, 1H,  $\text{H}_{19}$ ), 6.99 (s, 1H, NH), 6.82 – 6.79 (m, 1H,  $\text{H}_5$ ), 5.17 (s, 1H,  $\text{H}_{14}$ ), 2.35 (s, 3H,  $\text{H}_7$ ), 2.29 (s, 3H,  $\text{H}_{18}$ ), 2.12 (s, 3H,  $\text{H}_4$ ), 1.37 (s, 9H,  $\text{H}_{24}$ ).

**$^{13}\text{C}$  NMR (75 MHz,  $\text{CDCl}_3$ )**  $\delta_{\text{C}}$  171.7, 168.2, 141.3, 139.5, 139.0, 138.5, 137.6, 135.9, 134.4, 132.6, 130.8, 130.6, 128.9, 128.7, 127.9, 127.6, 127.3, 102.0, 71.7, 51.5, 28.8, 21.6, 20.3, 20.1.

**FTIR ( $\text{cm}^{-1}$ ):** 3340, 2972, 2905, 1679, 1623, 1363, 1243, 773.

**Melting point ( $^{\circ}\text{C}$ ):** 132 – 135.

**HRMS (ESI):** Exact mass calculated for  $\text{C}_{28}\text{H}_{32}\text{IN}_2\text{O}_2^+$  [ $\text{M}+\text{H}$ ] $^+$  555.1503, found 555.1501.  $\Delta = -0.4$  ppm.

**rac-(R,R)-N-(2-bromo-4,6-dimethylphenyl)-N-(2-(tert-butylamino)-2-oxo-1-phenylethyl)benzamide, *anti*-1ap**

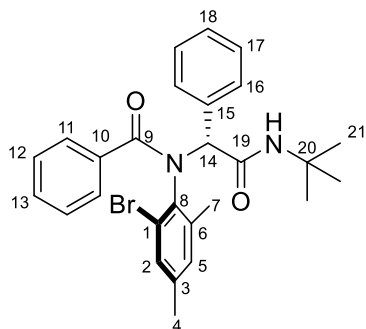

2-Bromo-4,6-dimethylaniline (60 mg, 0.30 mmol, 1.0 eq.), benzoic acid (37 mg, 0.30 mmol, 1.0 eq.), benzaldehyde (31  $\mu$ L, 0.30 mmol, 1.0 eq.), 2,2,2-trifluoroethanol (0.6 ml, 0.5 M) and *tert*-butyl isocyanide (34  $\mu$ L, 0.30 mmol, 1.0 eq.) were subjected to **General Procedure A**. [N.B. in this case, the crude residue obtained upon removal of 2,2,2-trifluoroethanol was directly purified via column chromatography without an aqueous workup]. Purification *via* column chromatography eluting with petrol 40-60/Et<sub>2</sub>O 65:35 afforded the title compound *anti*-**1ap** as a pale-yellow oil (91 mg, 62% yield, 90:10 d.r.). An analytically pure sample of the *anti*-diastereoisomer was obtained by further column chromatography eluting with petrol 40-60/Et<sub>2</sub>O 70:30.

**<sup>1</sup>H NMR (300 MHz, CDCl<sub>3</sub>):**  $\delta_{\text{H}}$  7.52 – 7.48 (m, 2H, H<sub>11</sub>), 7.46 (dd, *J* = 6.7, 2.9 Hz, 2H, H<sub>16</sub>), 7.29 – 7.19 (m, 4H, H<sub>13</sub>, H<sub>17</sub> and H<sub>18</sub>), 7.16 (t, *J* = 7.7 Hz, 2H, H<sub>12</sub>), 7.13 (s, 1H, NH), 7.07 (d, *J* = 2.0 Hz, 1H, H<sub>2</sub>), 6.73 – 6.68 (m, 1H, H<sub>5</sub>), 5.30 (s, 1H, H<sub>14</sub>), 2.22 (s, 3H, H<sub>7</sub>), 2.12 (s, 3H, H<sub>4</sub>), 1.37 (s, 9H, H<sub>21</sub>).

**<sup>13</sup>C NMR (75 MHz, CDCl<sub>3</sub>):**  $\delta_{\text{C}}$  172.1, 168.4, 139.6, 138.9, 138.0, 135.8, 134.5, 132.0, 131.6, 130.6, 129.6, 128.1, 128.1, 127.7, 124.7, 71.3, 51.5, 28.8, 20.6, 19.5. N.B. Peak at 128.1 ppm corresponds to two overlapping signals.

**FTIR (cm<sup>-1</sup>):** 2971, 1669, 1640, 1454, 1392, 1364, 1307, 1225, 728, 698.

**Melting Point (°C):** 149 – 151

**HRMS (ESI):** Exact mass calculated for C<sub>27</sub>H<sub>30</sub>BrN<sub>2</sub>O<sub>2</sub><sup>+</sup> [M+H]<sup>+</sup>: 493.1485, found: 493.1482.  $\Delta$  = -0.6 ppm.

***rac*-(*R<sub>a</sub>*,*R*)-N-(2-(*tert*-butylamino)-2-oxo-1-phenylethyl)-N-(2-chloro-4,6-dimethylphenyl)benzamide, *anti*-1a<sub>q</sub>**

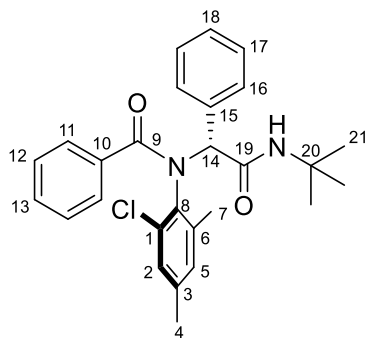

2-Chloro-4,6-dimethylaniline (47 mg, 0.30 mmol, 1.0 eq.), benzoic acid (37 mg, 0.30 mmol, 1.0 eq.), benzaldehyde (31  $\mu$ L, 0.30 mmol, 1.0 eq.), 2,2,2-trifluoroethanol (0.6 ml, 0.5 M) and *tert*-butyl isocyanide (34  $\mu$ L, 0.30 mmol, 1.0 eq.) were subjected to **General Procedure A**. [N.B. in this case, the crude residue obtained upon removal of 2,2,2-trifluoroethanol was directly purified via column chromatography without an aqueous workup]. Purification *via* column chromatography eluting with petrol 40-60/Et<sub>2</sub>O 70:30 afforded the title compound *anti*-1a<sub>q</sub> as a white solid (96 mg, 71% yield, 77:23 d.r.). An analytically pure sample of the *anti*-diastereoisomer was obtained by further column chromatography eluting with petrol 40-60/Et<sub>2</sub>O 70:30.

**<sup>1</sup>H NMR (400 MHz, CDCl<sub>3</sub>):**  $\delta_{\text{H}}$  7.51 – 7.41 (m, 4H, H<sub>11</sub> and H<sub>16</sub>), 7.30 – 7.09 (m, 7H, H<sub>12</sub>, H<sub>13</sub>, H<sub>17</sub>, H<sub>18</sub> and NH), 6.90 (d, *J* = 2.1 Hz, 1H, H<sub>2</sub>), 6.64 (d, *J* = 2.1 Hz, 1H, H<sub>5</sub>), 5.38 (s, 1H, H<sub>14</sub>), 2.16 (s, 3H, H<sub>7</sub>), 2.12 (s, 3H, H<sub>4</sub>), 1.39 (s, 9H, H<sub>21</sub>).

**<sup>13</sup>C NMR (101 MHz, CDCl<sub>3</sub>):**  $\delta_{\text{C}}$  172.3, 168.5, 139.3, 138.7, 136.5, 135.9, 134.4, 133.5, 130.7, 130.6, 129.4, 128.6, 128.2, 128.1, 127.8, 127.7, 70.8, 51.5, 28.8, 20.8, 19.1.

**FTIR (cm<sup>-1</sup>):** 3301, 2965, 2926, 1667, 1520, 1454, 1324, 1309, 1226, 731, 699.

**Melting Point (°C):** 60 – 61.

**HRMS (ESI):** Exact mass calculated for C<sub>27</sub>H<sub>30</sub>ClN<sub>2</sub>O<sub>2</sub><sup>+</sup> [M+H]<sup>+</sup>: 449.1991, found: 449.1987.  $\Delta$  = -0.9 ppm.

**rac-(*R*,*R*) N-(2-(*tert*-butylamino)-2-oxo-1-phenylethyl)-N-(3,5-dimethyl-[1,1'-biphenyl]-2-yl)benzamide, *anti*-1ar**

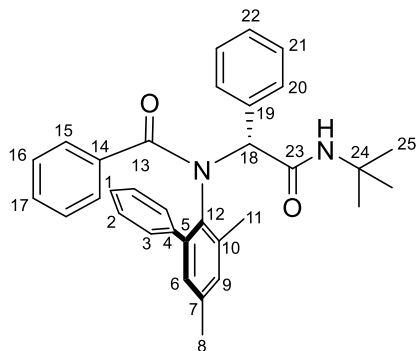

3,5-Dimethyl-[1,1'-biphenyl]-2-amine (59 mg, 0.30 mmol, 1.0 eq.), benzoic acid (37 mg, 0.30 mmol, 1.0 eq.), benzaldehyde (31  $\mu$ L, 0.30 mmol, 1.0 eq.), 2,2,2-trifluoroethanol (0.6 ml, 0.5 M) and *tert*-butyl isocyanide (34  $\mu$ L, 0.30 mmol, 1.0 eq.) were subjected to **General Procedure A**. [N.B. in this case, the crude residue obtained upon removal of 2,2,2-trifluoroethanol was directly purified via column chromatography without an aqueous workup]. Purification *via* column chromatography eluting with petrol 40-60/Et<sub>2</sub>O 70:30 afforded the title compound *anti*-1ar as a pale-yellow oil (136 mg, 92% yield, >95:5 d.r.).

**<sup>1</sup>H NMR (400 MHz, CDCl<sub>3</sub>):**  $\delta_{\text{H}}$  7.37 (dd, *J* = 8.0, 1.4 Hz, 2H, H<sub>15</sub>), 7.33 – 7.28 (m, 1H, H<sub>17</sub>), 7.21 – 7.03 (m, 8H, H<sub>1</sub>, H<sub>16</sub>, H<sub>20</sub>, H<sub>21</sub> and H<sub>22</sub>), 7.00 (d, *J* = 2.1 Hz, 1H, H<sub>9</sub>), 6.97 (t, *J* = 7.6 Hz, 2H, H<sub>2</sub>), 6.74 – 6.71 (m, 2H, NH and H<sub>6</sub>), 6.59 (d, *J* = 7.2 Hz, 2H, H<sub>3</sub>), 4.95 (s, 1H, H<sub>18</sub>), 2.48 (s, 3H, H<sub>11</sub>), 2.27 (s, 3H, H<sub>8</sub>), 1.29 (s, 9H, H<sub>25</sub>).

**<sup>13</sup>C NMR (101 MHz, CDCl<sub>3</sub>):**  $\delta_{\text{C}}$  170.3, 168.7, 140.5, 139.5, 138.5, 137.7, 136.4, 135.6, 135.4, 132.2, 131.1, 130.6, 129.4, 129.3, 128.8, 128.2, 127.9, 127.6, 127.6, 127.1, 74.8, 51.3, 28.7, 20.9, 19.2.

**FTIR (cm<sup>-1</sup>):** 3287, 2970, 1673, 1642, 1512, 1448, 1364, 1306, 1226, 729, 698.

**HRMS (ESI):** Exact mass calculated for C<sub>33</sub>H<sub>35</sub>N<sub>2</sub>O<sub>2</sub><sup>+</sup> [M+H]<sup>+</sup>: 491.2693, found: 491.2689.  $\Delta$  = -0.8 ppm.



***rac*-(*R*,*R*)-*N*-(8-Bromonaphthalen-1-yl)-*N*-(2-(*tert*-butylamino)-2-oxo-1-phenylethyl)benzamide, *anti*-1as**

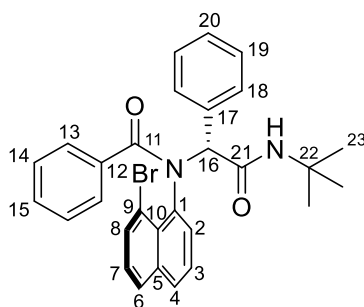

8-Bromonaphthalen-1-amine (67 mg, 0.30 mmol, 1.0 eq.), benzoic acid (37 mg, 0.30 mmol, 1.0 eq.), benzaldehyde (31  $\mu$ L, 0.30 mmol, 1.0 eq.), 2,2,2-trifluoroethanol (0.6 mL, 0.5 M) and *tert*-butyl isocyanide (34  $\mu$ L, 0.30 mmol, 1.0 eq.) were subjected to **General Procedure A**. Purification *via* column chromatography eluting with petrol 40-60/Et<sub>2</sub>O 65:35 afforded the title compound *anti*-1as as a brown solid (94 mg, 61% yield, 95:5 d.r.).

**<sup>1</sup>H NMR (400 MHz, CDCl<sub>3</sub>):**  $\delta_{\text{H}}$  7.74 – 7.69 (m, 2H, H<sub>4</sub> and H<sub>8</sub>), 7.69 – 7.64 (m, 3H, H<sub>6</sub> and H<sub>18</sub>), 7.54 (dd, *J* = 7.5, 1.3 Hz, 1H, H<sub>2</sub>), 7.42 (t, *J* = 7.4 Hz, 2H, H<sub>19</sub>), 7.39 – 7.33 (m, 2H, H<sub>3</sub> and H<sub>20</sub>), 7.24 – 7.20 (m, 2H, H<sub>13</sub>), 7.13 (t, *J* = 7.8 Hz, 1H, H<sub>7</sub>), 7.00 – 6.95 (m, 1H, H<sub>15</sub>), 6.91 (t, *J* = 7.5 Hz, 2H, H<sub>14</sub>), 6.30 (s, 1H, H<sub>16</sub>), 6.06 (s, 1H, N-H), 1.00 (s, 9H, H<sub>23</sub>).

**<sup>13</sup>C NMR (101 MHz, CDCl<sub>3</sub>):**  $\delta_{\text{C}}$  171.1, 166.9, 137.4, 137.3, 136.5, 136.4, 134.5, 131.2, 130.2, 129.5, 129.1, 129.1, 128.7, 128.2, 128.1, 127.3, 126.1, 125.5, 116.9, 68.1, 51.5, 28.2. N.B. Peak at 129.5 ppm corresponds to two overlapping signals.

**FTIR (cm<sup>-1</sup>):** 3331, 3061, 2969, 1687, 1627, 1363.

**Melting Point (°C):** 196-199.

**HRMS (ESI):** Exact mass calculated for C<sub>29</sub>H<sub>28</sub>BrN<sub>2</sub>O<sub>2</sub><sup>+</sup> [M+H]<sup>+</sup>: 515.1329, found 515.1325.  $\Delta$  = - 0.8 ppm.

***rac*-(*S<sub>a</sub>*,*R*)-*N*-(2-(*tert*-Butylamino)-2-oxo-1-phenylethyl)-*N*-(2-methylnaphthalen-1-yl)benzamide, *anti*-1at**

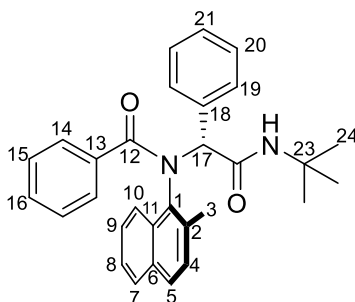

2-methyl-1-naphthylamine (47 mg, 0.30 mmol, 1.0 eq.), benzoic acid (37 mg, 0.30 mmol, 1.0 eq.), benzaldehyde (31  $\mu$ L, 0.30 mmol, 1.0 eq.), 2,2,2-trifluoroethanol (0.6 mL, 0.5 M) and *tert*-butyl isocyanide (34  $\mu$ L, 0.30 mmol, 1.0 eq.) were subjected to **General Procedure A**. Purification *via* column chromatography eluting with petrol 40-60/Et<sub>2</sub>O 70:30 afforded the title compound *anti*-1at as a white solid (78 mg, 58% yield, 90:10 d.r.). An analytically pure sample of the *anti* diastereoisomer was obtained by further column chromatography (petrol 40-60/Et<sub>2</sub>O 70:30).

**<sup>1</sup>H NMR (400 MHz, CDCl<sub>3</sub>):**  $\delta_{\text{H}}$  9.03 (d, *J* = 8.5 Hz, 1H, H<sub>10</sub>/H<sub>7</sub>), 7.81 – 7.70 (m, 2H, H<sub>Ar</sub>), 7.57 – 7.45 (m, 4H, H<sub>Ar</sub>), 7.31 (d, *J* = 7.8 Hz, 2H, H<sub>14</sub>), 7.29 – 7.19 (m, 3H, H<sub>Ar</sub>), 7.09 (t, *J* = 7.5 Hz, 1H, H<sub>16</sub>), 6.94 (t, *J* = 7.6 Hz, 2H, H<sub>15</sub>), 6.88 (d, *J* = 8.4 Hz, 1H, H<sub>4</sub>), 5.79 (s, 1H, NH), 5.08 (s, 1H, H<sub>17</sub>), 1.63 (s, 3H, H<sub>3</sub>), 1.40 (s, 9H, H<sub>24</sub>).

**<sup>13</sup>C NMR (101 MHz, CDCl<sub>3</sub>):**  $\delta_{\text{C}}$  171.7, 167.4, 136.2, 136.2, 135.8, 135.2, 133.2, 131.4, 131.0, 130.0, 129.0, 128.8, 128.7, 128.3, 128.0, 127.7, 127.4, 125.7, 124.2, 70.8, 51.8, 28.9, 18.4. N.B. Peak at 128.3 ppm corresponds to two overlapping signals.

**FTIR (cm<sup>-1</sup>):** 3318, 3059, 2969, 1682, 1644, 1511, 1365, 729.

**Melting Point (°C):** 191-194.

**HRMS (ESI):** Exact mass calculated for C<sub>30</sub>H<sub>31</sub>N<sub>2</sub>O<sub>2</sub><sup>+</sup> [M+H]<sup>+</sup>: 451.2380, found 451.2377.  $\Delta$  = - 0.8 ppm.

**Attempted synthesis of N-(2-(*tert*-butylamino)-2-oxo-1-phenylethyl)-N-(2-isopropyl-4-methylpyridin-3-yl)benzamide, *anti*-1au**

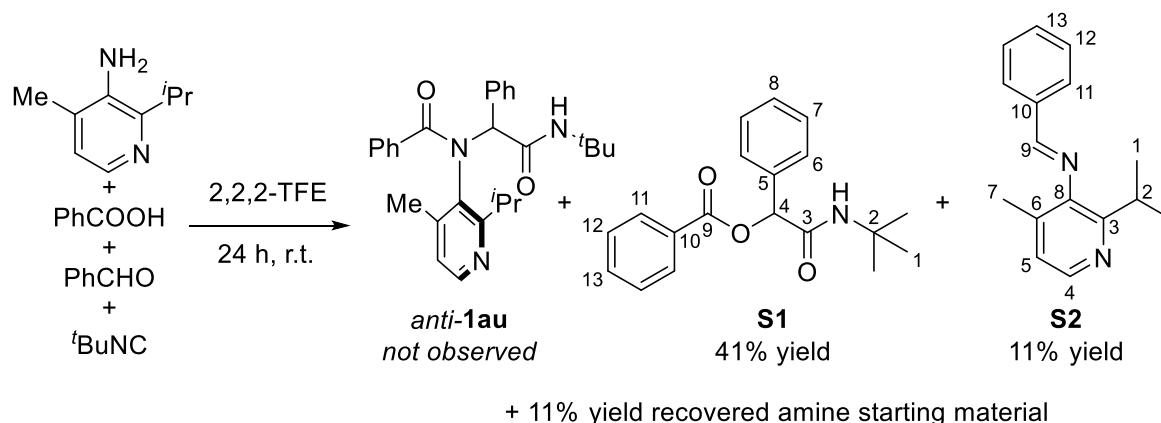

2-isopropyl-4-methylpyridin-3-amine (45 mg, 0.30 mmol, 1.0 eq.), benzoic acid (37 mg, 0.30 mmol, 1.0 eq.), benzaldehyde (31  $\mu$ L, 0.30 mmol, 1.0 eq.), 2,2,2-trifluoroethanol (0.6 mL, 0.5 M) and *tert*-butyl isocyanide (34  $\mu$ L, 0.30 mmol, 1.0 eq.) were subjected to **General Procedure A**. Purification *via* column chromatography eluting with CH<sub>2</sub>Cl<sub>2</sub>/MeOH (90:10) afforded **S1** as a white solid (38 mg, 41% yield), **S2** as a yellow oil (8 mg, 11% yield) and recovered 2-isopropyl-4-methylpyridin-3-amine (5 mg, 11% yield).

**Data for *rac*-2-(*tert*-Butylamino)-2-oxo-1-phenylethyl benzoate, S1**

**<sup>1</sup>H NMR (400 MHz, CDCl<sub>3</sub>):**  $\delta_{\text{H}}$  8.09 (d, *J* = 7.2 Hz, 2H, H<sub>11</sub>), 7.61 (t, *J* = 7.4 Hz, 1H, H<sub>13</sub>), 7.55 – 7.49 (m, 2H, H<sub>Ar</sub>), 7.48 (t, *J* = 7.7 Hz, 2H, H<sub>Ar</sub>), 7.43 – 7.35 (m, 3H, H<sub>Ar</sub>), 6.22 (s, 1H, H<sub>4</sub>), 6.00 (s, 1H, NH), 1.37 (s, 9H, H<sub>1</sub>).

**<sup>13</sup>C NMR (101 MHz, CDCl<sub>3</sub>):**  $\delta_{\text{C}}$  167.5, 165.0, 136.1, 133.7, 129.9, 129.5, 129.0, 128.9, 128.8, 127.6, 76.2, 51.7, 28.8.

The spectral data matched that reported in the literature.<sup>[2]</sup>

**Data for N-(2-isopropyl-4-methylpyridin-3-yl)-1-phenylmethanimine, S2**

**<sup>1</sup>H NMR (400 MHz, CDCl<sub>3</sub>):**  $\delta_{\text{H}}$  8.25 (d, *J* = 4.9 Hz, 1H, H<sub>4</sub>), 8.23 (s, 1H, H<sub>9</sub>), 7.94 – 7.89 (m, 2H, H<sub>11</sub>), 7.58 – 7.48 (m, 3H, H<sub>12</sub> and H<sub>13</sub>), 6.99 (d, *J* = 4.9 Hz, 1H, H<sub>5</sub>), 3.15 (sept, *J* = 6.8 Hz, 1H, H<sub>2</sub>), 2.14 (s, 3H, H<sub>7</sub>), 1.23 (d, *J* = 6.8 Hz, 6H, H<sub>1</sub>).

**<sup>13</sup>C NMR (101 MHz, CDCl<sub>3</sub>):**  $\delta_{\text{C}}$  163.6, 156.2, 146.1, 144.7, 135.8, 135.7, 132.0, 129.0, 128.8, 123.2, 30.2, 21.9, 18.1.

**FTIR (cm<sup>-1</sup>):** 3049, 2963, 2927, 1638, 1580, 1183.

**HRMS (ESI):** Exact mass calculated for C<sub>16</sub>H<sub>19</sub>N<sub>2</sub><sup>+</sup> [M+H]<sup>+</sup>: 239.1543, found 239.1541.  $\Delta$  = - 0.8 ppm.

Attempted synthesis of **N-(2-(*tert*-butylamino)-2-oxo-1-phenylethyl)-N-(2-isopropyl-4-methylpyridin-3-yl)benzamide, *anti*-1av**

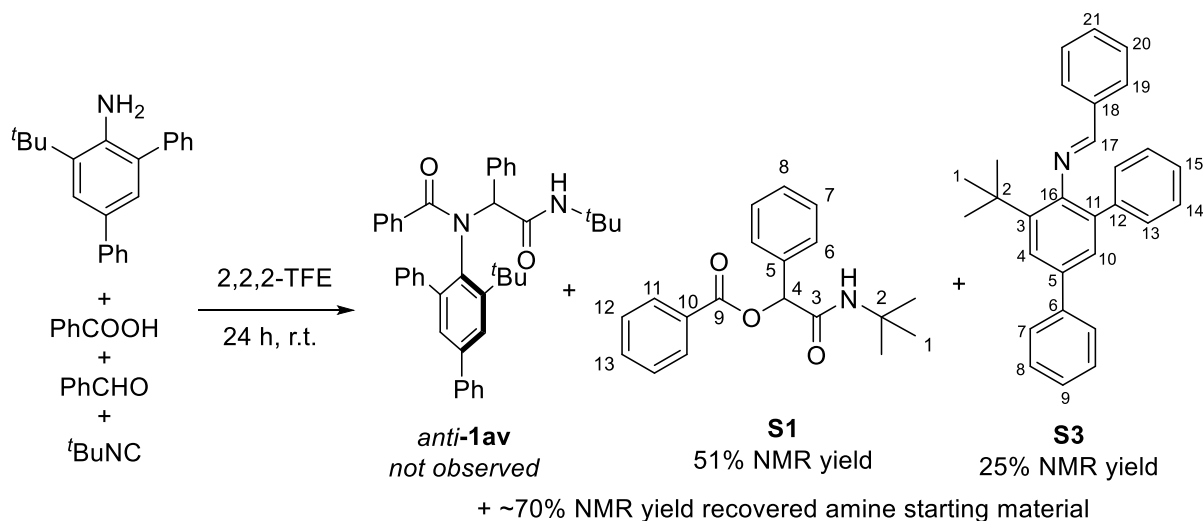

5'-(*tert*-butyl)-[1,1':3',1''-terphenyl]-4'-amine (90 mg, 0.30 mmol, 1.0 eq.), benzoic acid (37 mg, 0.30 mmol, 1.0 eq.), benzaldehyde (31  $\mu\text{L}$ , 0.3 mmol, 1.0 eq.), 2,2,2-trifluoroethanol (0.6 mL, 0.5 M) and *tert*-butyl isocyanide (34  $\mu\text{L}$ , 0.30 mmol, 1.0 eq.) were subjected to **General Procedure A**. In this case, the crude residue obtained upon removal of 2,2,2-trifluoroethanol was dissolved in  $\text{CDCl}_3$  (~2 mL) and 1,1,2,2-tetrachloroethane (16  $\mu\text{L}$ , 0.15 mmol) was added. The resulting solution was analysed by quantitative  $^1\text{H}$  NMR (400 MHz, relaxation delay = 25 s) and was determined to contain **S1** (51% NMR yield), **S3** (25% NMR yield) and unreacted 5'-(*tert*-butyl)-[1,1':3',1''-terphenyl]-4'-amine (~70% NMR yield).

The spectral data for **S1** was identical to that described above. The spectral data for **S3** was identical to an authentic sample prepared as described below.

**N-(5'-(*tert*-butyl)-[1,1':3',1''-terphenyl]-4'-yl)-1-phenylmethanimine, S3**

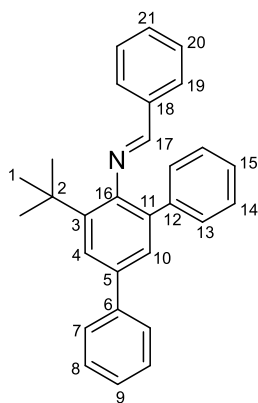

5'-(*tert*-butyl)-[1,1':3',1''-terphenyl]-4'-amine (1.51 g, 5.00 mmol, 1.0 eq.) was dissolved in ethanol (20 mL) under nitrogen. Benzaldehyde (0.51 mL, 5.0 mmol, 1.0 eq.) was added and the resulting solution was refluxed for 17 hours. The resulting mixture was cooled to room temperature, concentrated and then purified by column chromatography (petrol/Et<sub>2</sub>O 98:2) to afford **S3** as a brown solid (760 mg, 39%).

**<sup>1</sup>H NMR (400 MHz, CDCl<sub>3</sub>):** δ<sub>H</sub> 7.86 (s, 1H, H<sub>17</sub>), 7.68 – 7.64 (m, 3H, H<sub>4</sub> and H<sub>Ar</sub>), 7.60 (dt, *J* = 8.1, 1.6 Hz, 2H, H<sub>Ar</sub>), 7.52 (d, *J* = 2.0 Hz, 1H, H<sub>10</sub>), 7.47 – 7.30 (m, 8H, H<sub>Ar</sub>), 7.27 – 7.20 (m, 2H, H<sub>Ar</sub>), 7.16 – 7.09 (m, 1H, H<sub>Ar</sub>), 1.50 (s, 9H, H<sub>1</sub>).

**<sup>13</sup>C NMR (101 MHz, CDCl<sub>3</sub>):** δ<sub>C</sub> 164.0, 149.6, 142.4, 141.5, 140.9, 136.8, 136.5, 133.5, 131.2, 130.7, 128.9, 128.7, 128.5, 128.2, 128.1, 127.2, 127.1, 126.2, 124.7, 36.2, 30.7.

**FTIR (cm<sup>-1</sup>):** 3059, 2956, 2870, 1634, 1601, 1579, 1423, 907, 885, 762, 751, 731, 691.

**Melting Point (°C):** 119-120.

**HRMS (ESI):** Exact mass calculated for C<sub>29</sub>H<sub>28</sub>N [M+H]<sup>+</sup>: 390.2216, found: 390.2199. Δ = 4.4 ppm.

***rac*-(*R<sub>a</sub>*,*R*)- N-(2-(*tert*-butyl)phenyl)-N-(2-(cyclohexylamino)-2-oxo-1-phenylethyl)-2,4-dimethylthiazole-5-carboxamide, *anti*-1aw**

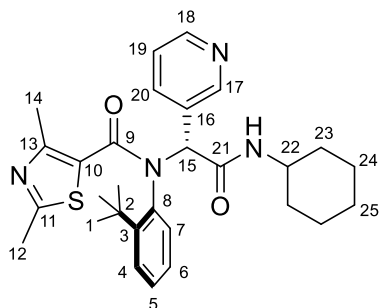

2-*tert*-Butylaniline (180 mg, 1.20 mmol, 1.0 eq.), 2,4-dimethyl-1,3-thiazole-5-carboxylic acid (189 mg, 1.20 mmol, 1.0 eq.), 3-pyridinecarboxaldehyde (113  $\mu$ L 1.20 mmol, 1.0 eq.), 2,2,2-trifluoroethanol (2.4 ml, 0.5 M) and cyclohexyl isocyanide (149  $\mu$ L, 1.20 mmol, 1.0 eq.) were subjected to **General Procedure A**. Purification *via* column chromatography eluting with petrol 40-60/EtOAc 20:80 afforded the title compound *anti*-1aw as a white solid (239 mg, 39% yield, >95:5 d.r.). An analytical quantity of *anti*-1aw was further purified by recrystallization from boiling petrol 40-60/EtOAc which was used for biological testing.

**<sup>1</sup>H NMR (400 MHz, CDCl<sub>3</sub>):**  $\delta$ <sub>H</sub> 8.63 (d, *J* = 2.3 Hz, 1H, H<sub>17</sub>), 8.60 (dd, *J* = 4.8, 1.6 Hz, 1H, H<sub>18</sub>), 8.21 (dt, *J* = 8.1, 2.0 Hz, 1H, H<sub>20</sub>), 7.65 (dd, *J* = 7.9, 1.6 Hz, 1H, H<sub>7</sub>), 7.43 (dd, *J* = 8.2, 1.6 Hz, 1H, H<sub>4</sub>), 7.37 – 7.29 (m, 2H, H<sub>5</sub> and H<sub>19</sub>), 7.21 (td, *J* = 7.5, 1.6 Hz, 1H, H<sub>6</sub>), 5.81 (d, *J* = 8.0 Hz, 1H, NH), 5.35 (s, 1H, H<sub>15</sub>), 3.86 – 3.74 (m, 1H, H<sub>22</sub>), 2.64 (s, 3H, H<sub>14</sub>), 2.40 (s, 3H, H<sub>12</sub>), 1.98 – 1.77 (m, 2H, H<sub>Cy</sub>), 1.69 – 1.50 (m, 3H, H<sub>Cy</sub>), 1.39 – 1.22 (m, 2H, H<sub>Cy</sub>), 1.05 (s, 12H, H<sub>1</sub> and H<sub>Cy</sub>).

**<sup>13</sup>C NMR (101 MHz, CDCl<sub>3</sub>):**  $\delta$ <sub>C</sub> 167.8, 167.2, 165.5, 160.5, 151.8, 150.3, 148.2, 140.3, 138.8, 133.2, 132.0, 130.6, 129.6, 127.7, 123.8, 123.3, 71.0, 49.1, 36.3, 32.9, 32.7, 32.2, 25.5, 24.8, 24.8, 18.7, 18.5.

**FTIR (cm<sup>-1</sup>):** 2931, 1678, 1627, 1512, 1428, 1312, 909, 727.

**Melting Point (°C):** 153 – 155.

**HRMS (ESI):** Exact mass calculated for C<sub>29</sub>H<sub>37</sub>N<sub>4</sub>O<sub>2</sub>S<sup>+</sup> [M+H]<sup>+</sup>: 505.2632, found: 505.2630.  $\Delta$  = -0.4 ppm.

### 3.2. Mechanistic experiments and configurational stability studies

#### (a) Thermal atropisomerization of *anti-1a* in different solvents:

A solution of *anti-1a* (20 mg, 0.045 mmol) was dissolved in the appropriate solvent (0.5 mL) and the resulting solution was heated (in either a microwave vial or Ace pressure tube as appropriate) to 110 °C for 48 h. The resulting solution was cooled to room temperature and concentrated to dryness. The residue was dissolved in CDCl<sub>3</sub> (0.6 mL) and the resulting solution was analysed by <sup>1</sup>H NMR spectroscopy to determine the d.r. of *syn-1a*.

#### (b) Monitoring epimerization of *1a* by <sup>1</sup>H-NMR spectroscopy

Epimerization of *anti-1a*: an NMR sample of *anti-1a* (>95:5 d.r.; ~10 mg) in 0.5 mL of *d*<sub>6</sub>-DMSO was loaded into a 500 MHz NMR spectrometer which had been preheated to 110 °C. <sup>1</sup>H NMR spectra were recorded at regular intervals over the course of 2.74 hours. In each spectrum, diagnostic signals for *anti-1a* (δ<sub>H</sub> = 6.07 ppm) and *syn-1a* (δ<sub>H</sub> = 6.01 ppm) were integrated to obtain the diastereomeric ratios. The resulting data were as follows:

| time / hours | fraction <i>anti-1a</i> | fraction <i>syn-1a</i> | ln([ <i>anti</i> ] <sub>t</sub> - [ <i>anti</i> ] <sub>eq</sub> ) |
|--------------|-------------------------|------------------------|-------------------------------------------------------------------|
| 0.000        | 0.9952                  | 0.0048                 | -0.0960                                                           |
| 0.073        | 0.8288                  | 0.1712                 | -0.2983                                                           |
| 0.149        | 0.6333                  | 0.3667                 | -0.6040                                                           |
| 0.232        | 0.4991                  | 0.5009                 | -0.8858                                                           |
| 0.315        | 0.4152                  | 0.5848                 | -1.1132                                                           |
| 0.399        | 0.3372                  | 0.6628                 | -1.3843                                                           |
| 0.482        | 0.2848                  | 0.7152                 | -1.6190                                                           |
| 0.567        | 0.2486                  | 0.7514                 | -1.8208                                                           |
| 0.649        | 0.2151                  | 0.7849                 | -2.0526                                                           |
| 0.757        | 0.1848                  | 0.8152                 | -2.3218                                                           |
| 0.826        | 0.1693                  | 0.8307                 | -2.4937                                                           |
| 0.907        | 0.1515                  | 0.8485                 | -2.7364                                                           |
| 0.993        | 0.1371                  | 0.8629                 | -2.9878                                                           |
| 1.073        | 0.1333                  | 0.8667                 | -3.0662                                                           |
| 1.159        | 0.1261                  | 0.8739                 | -3.2340                                                           |
| 1.240        | 0.1178                  | 0.8822                 | -3.4705                                                           |
| 1.329        | 0.1098                  | 0.8902                 | -3.7679                                                           |
| 1.412        | 0.1039                  | 0.8961                 | -4.0628                                                           |
| 1.493        | 0.1006                  | 0.8994                 | –                                                                 |
| 1.581        | 0.1009                  | 0.8991                 | –                                                                 |
| 1.659        | 0.0947                  | 0.9053                 | –                                                                 |
| 1.745        | 0.0901                  | 0.9099                 | –                                                                 |

|       |                           |        |   |
|-------|---------------------------|--------|---|
| 1.832 | 0.0869                    | 0.9131 | – |
| 1.909 | 0.0867                    | 0.9133 | – |
| 1.996 | 0.0905                    | 0.9095 | – |
| 2.079 | 0.0872                    | 0.9128 | – |
| 2.156 | 0.0855                    | 0.9145 | – |
| 2.243 | 0.0872                    | 0.9128 | – |
| 2.329 | 0.0856                    | 0.9144 | – |
| 2.412 | 0.0853                    | 0.9147 | – |
| 2.493 | 0.0850                    | 0.9150 | – |
| 2.573 | 0.0843                    | 0.9157 | – |
| 2.657 | 0.0861                    | 0.9139 | – |
| 2.740 | 0.0867 = $[anti-1a]_{eq}$ | 0.9133 | – |

This data was used to construct the time course plot shown in Scheme 4B of the manuscript.

The associated kinetic parameters were calculated by plotting the deviation from equilibrium. i.e.,  $\ln([anti-1a]_t - [anti-1a]_{eq})$  against time to give a straight line with a gradient =  $-(k_f + k_b)$ , where  $[anti-1a]_t$  and  $[anti-1a]_{eq}$  are the respective molar fractions of *anti-1a* at time *t* and at equilibrium and  $k_f$  and  $k_b$  are the forward and backward rate constants respectively. This analysis generated the following straight-line graph:

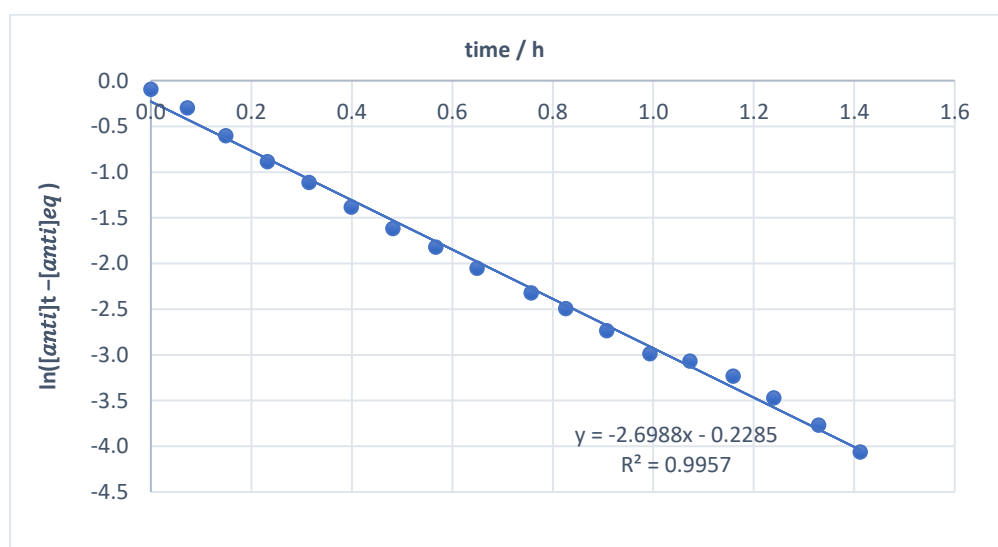

Therefore,  $(k_f + k_b) = 2.70 \text{ h}^{-1}$

Given the equilibrium ratio of *syn/anti-1a* of 0.9133:0.0867 measured after 2.74 hours, we calculated that:

$$K_{eq} = \frac{0.9133}{0.0867} = 10.53$$

And because  $K_{eq} = \frac{k_f}{k_b}$



$k_f = 2.46 \text{ h}^{-1}$  and  $k_b = 0.23 \text{ h}^{-1}$  (at 110 °C)

These values were substituted into the Eyring equation to calculate the associated values of  $\Delta G^\ddagger$  (at 110 °C), which were as follows:

$\Delta G_f^\ddagger = 28.2 \text{ kcal/mol}$  and  $\Delta G_b^\ddagger = 30.0 \text{ kcal/mol}$

Epimerization of *syn-1a*: an NMR sample of *syn-1a* (>95:5 d.r.; ~10 mg) in 0.5 mL of  $d_6$ -DMSO was loaded into a 500 MHz NMR spectrometer which had been preheated to 110 °C.  $^1\text{H}$  NMR spectra were recorded at regular intervals over the course of 1.82 hours. In each spectrum, diagnostic signals for *anti-1a* ( $\delta_{\text{H}} = 6.07 \text{ ppm}$ ) and *syn-1a* ( $\delta_{\text{H}} = 6.01 \text{ ppm}$ ) were integrated to obtain the diastereomeric ratios. The resulting data were as follows:

| time / hours | fraction <i>syn-1a</i> | fraction <i>anti-1a</i> |
|--------------|------------------------|-------------------------|
| 0.000        | 0.9778                 | 0.0222                  |
| 0.064        | 0.9660                 | 0.0340                  |
| 0.123        | 0.9566                 | 0.0434                  |
| 0.211        | 0.9495                 | 0.0505                  |
| 0.314        | 0.9429                 | 0.0571                  |
| 0.414        | 0.9334                 | 0.0666                  |
| 0.519        | 0.9324                 | 0.0676                  |
| 0.614        | 0.9287                 | 0.0713                  |
| 0.716        | 0.9235                 | 0.0765                  |
| 0.819        | 0.9205                 | 0.0795                  |
| 0.914        | 0.9201                 | 0.0799                  |
| 1.014        | 0.9197                 | 0.0803                  |
| 1.111        | 0.9172                 | 0.0828                  |
| 1.217        | 0.9182                 | 0.0818                  |
| 1.319        | 0.9150                 | 0.0850                  |
| 1.417        | 0.9157                 | 0.0843                  |
| 1.511        | 0.9142                 | 0.0858                  |
| 1.616        | 0.9148                 | 0.0852                  |
| 1.715        | 0.9115                 | 0.0885                  |
| 1.763        | 0.9123                 | 0.0877                  |
| 1.820        | 0.9100                 | 0.0900                  |

This data was used to construct the time course plot shown in Scheme 4B of the manuscript.

### (c) Monitoring epimerization of **1z** by HPLC analysis

A solution of *anti-1z* (>95:5 d.r.; 50 mg) in 0.5 mL of DMSO was prepared at room temperature in a microwave vial. The vial was stoppered with a rubber subseal, and the tube was immersed in an oil bath preheated to 110 °C. At each timepoint specified below, a 5 µL aliquot was removed, placed in a HPLC vial, and concentrated to dryness under a stream of nitrogen. The residue was dissolved in HPLC grade hexane and analysed by HPLC (Chiralpak-IC column. Solvent ratio = 90:10 *n*-hexane: *i*PrOH. Temperature = 25 °C. Flow rate = 1 ml/min,  $\lambda = 210$  nm,  $\tau_{ret}$  4.3 min (*syn*), 4.5-4.7 min (*anti* + *syn*); 5.5 min (*anti*). HPLC traces for pure *anti-1z* and *syn-1z* and an equimolar mixture of *syn/anti-1z* are shown below.

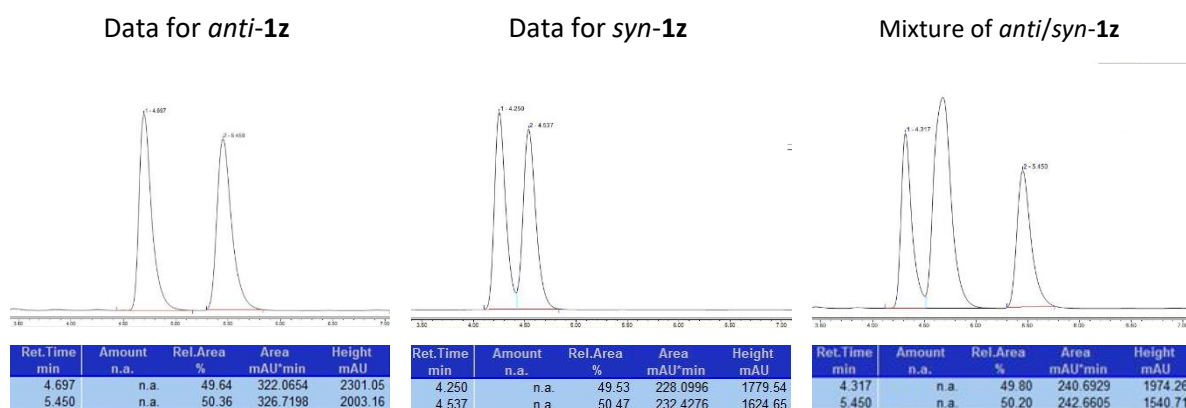

The resulting data (obtained *via* integration of the peaks at 4.3 and 5.5 min) were as follows:

| time / hours | fraction <i>anti-1z</i>   | fraction <i>syn-1z</i> | $\ln([anti]_t - [anti]_{eq})$ |
|--------------|---------------------------|------------------------|-------------------------------|
| 0.00         | 1.0000                    | 0.0000                 | -0.0961                       |
| 5.25         | 0.8666                    | 0.1334                 | -0.2549                       |
| 23.25        | 0.5448                    | 0.4552                 | -0.7914                       |
| 29.25        | 0.4653                    | 0.5347                 | -0.9843                       |
| 47.25        | 0.2849                    | 0.7151                 | -1.6435                       |
| 53.25        | 0.2611                    | 0.7389                 | -1.7749                       |
| 71.25        | 0.1801                    | 0.8199                 | -2.4248                       |
| 78.00        | 0.1672                    | 0.8328                 | -2.5823                       |
| 96.00        | 0.1324                    | 0.8676                 | -3.1991                       |
| 102.50       | 0.1221                    | 0.8779                 | -3.4900                       |
| 168.00       | 0.0918                    | 0.9082                 | —                             |
| 173.00       | 0.0916 = $[anti-1z]_{eq}$ | 0.9084                 | —                             |

The associated kinetic parameters were calculated by plotting the deviation from equilibrium. i.e.,  $\ln([anti-1z]_t - [anti-1z]_{eq})$  against time to give a straight line with a gradient =  $-(k_f + k_b)$ , where  $[anti-1z]_t$

and  $[anti-1z]_{eq}$  are the respective molar fractions of *anti-1z* at time  $t$  and at equilibrium and  $k_f$  and  $k_b$  are the forward and backward rate constants respectively. This analysis generated the following straight-line graph:

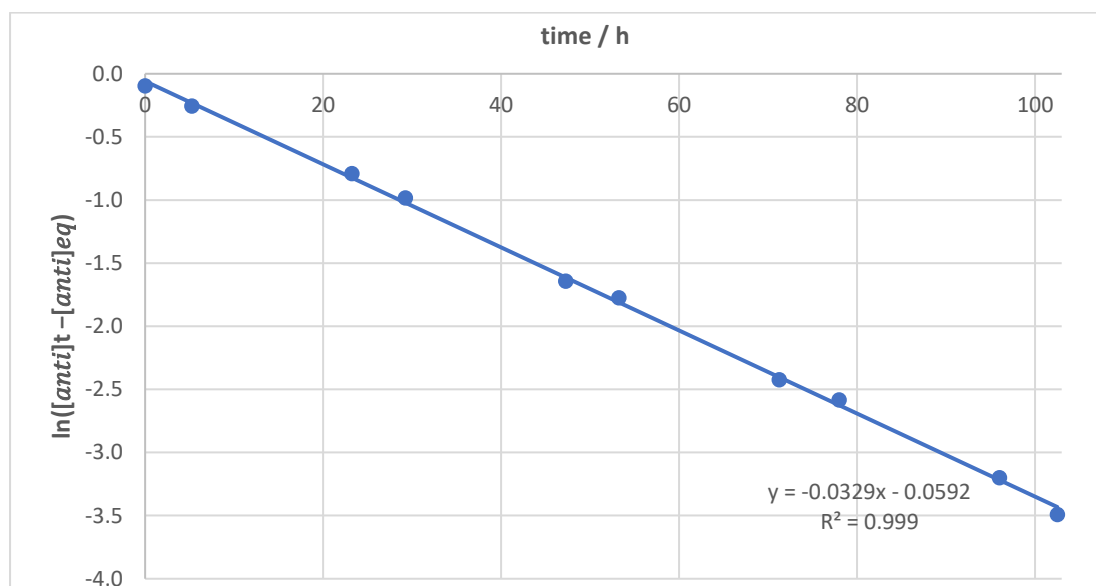

Therefore,  $(k_f + k_b) = 0.0329 \text{ h}^{-1}$

Given the equilibrium ratio of *syn/anti-1z* of 0.9084:0.0916 measured after 173 hours, we calculated that:

$$K_{eq} = \frac{0.9084}{0.0916} = 9.92$$

And because  $K_{eq} = \frac{k_f}{k_b}$

$k_f = 0.030 \text{ h}^{-1}$  and  $k_b = 0.0030 \text{ h}^{-1}$  (at 110 °C)

These values were substituted into the Eyring equation to calculate the associated values of  $\Delta G^\ddagger$  (at 110 °C), which were as follows:

$\Delta G_f^\ddagger = 31.5 \text{ kcal/mol}$  and  $\Delta G_b^\ddagger = 33.3 \text{ kcal/mol}$

*(d) Deuterium labelling experiment to probe the nature of thermal epimerization*

An Ace pressure tube (capacity ~15 mL, L × O.D. 10.2 cm × 25.4 mm) equipped with a stirrer bar, was sequentially charged with *anti*-**1a** (40 mg, 0.090 mmol) and *d*<sub>3</sub>-trifluoroethanol (1.0 mL). The tube was sealed, and the resulting mixture was heated to 110 °C in a preheated oil bath for 48 h. The resulting solution was cooled to room temperature and concentrated to dryness. Purification *via* column chromatography eluting with petrol 40-60/EtOAc 80:20 afforded **1a** as a pale-yellow solid (35 mg, 88% yield, 91:9 d.r. *syn/anti*).

<sup>1</sup>H NMR (400 MHz, CDCl<sub>3</sub>): δ<sub>H</sub> 8.07 (d, J = 7.7 Hz, 1H, H<sub>7</sub>), 7.33 (d, J = 7.8 Hz, 2H, H<sub>11</sub>), 7.28 – 7.02 (m, 11H, H<sub>16</sub>, H<sub>4</sub>, H<sub>5</sub>, H<sub>6</sub>, H<sub>12</sub>, H<sub>13</sub>, H<sub>17</sub> and H<sub>18</sub>), 6.05 (s, **1.00H**, H<sub>14</sub>), 5.89 (s, **0.77H**, N-H), 1.37 (s, 9H, H<sub>21</sub>), 0.84 (s, 9H, H<sub>1</sub>). The peaks for H<sub>14</sub> and the NH integrated to 1.00 and 0.77 respectively, implying <5% and 23% deuteration at these positions respectively.

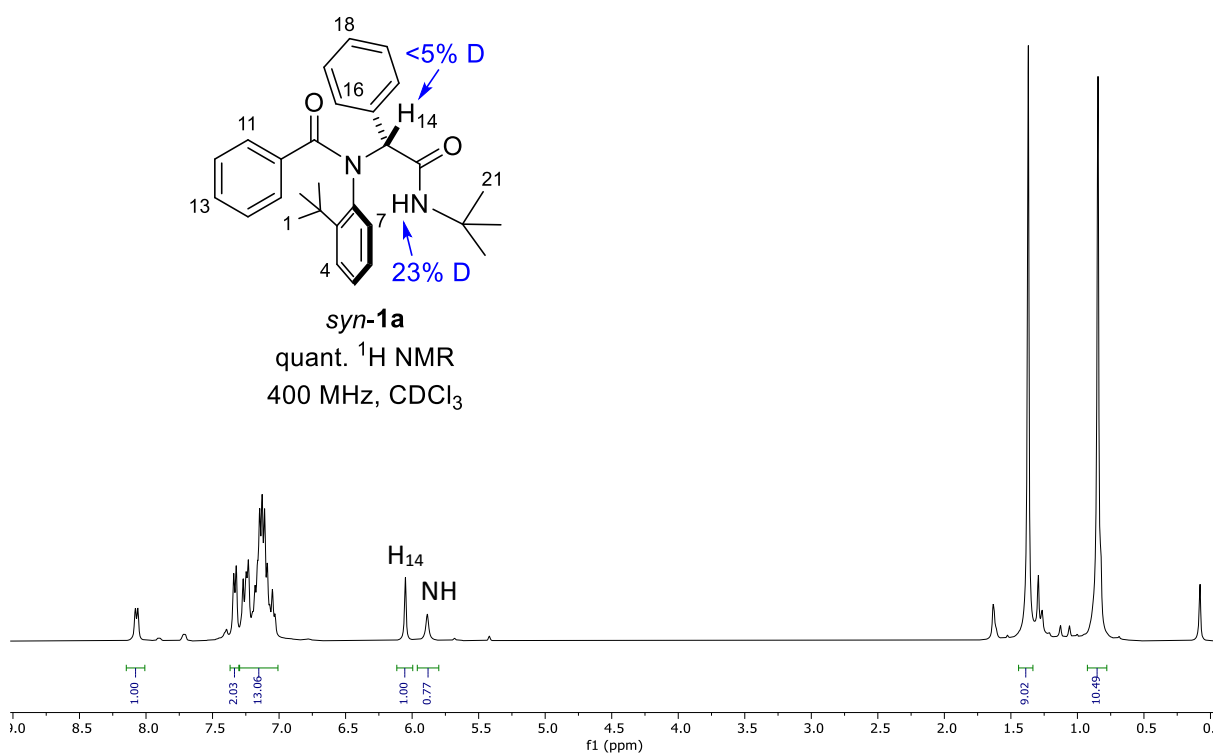

### 3.3. Synthesis of *syn*-configured peptide analogues

#### *rac*-(*S<sub>a</sub>*,*R*)-*N*-(2-(*tert*-Butyl)phenyl)-*N*-(2-(*tert*-butylamino)-2-oxo-1-phenylethyl)benzamide, *syn*-1a

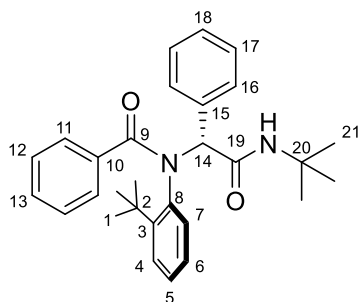

2-*tert*-Butylaniline (37 mg, 0.25 mmol, 1.0 eq.), benzoic acid (31 mg, 0.25 mmol, 1.0 eq.), benzaldehyde (25  $\mu$ L, 0.25 mmol, 1.0 eq.), 2,2,2-trifluoroethanol (0.5 mL, 0.5 M) and *tert*-butyl isocyanide (28  $\mu$ L, 0.25 mmol, 1.0 eq.) were subjected to **General Procedure B**. Purification via column chromatography eluting with petrol 40-60/Et<sub>2</sub>O 70:30 afforded the title compound *syn*-1a as a white solid (105 mg, 95% yield, 92:8 d.r.). An analytically pure sample of the *syn*-diastereoisomer was obtained by further column chromatography (petrol 40-60/Et<sub>2</sub>O 80:20).

**<sup>1</sup>H NMR (300 MHz, CDCl<sub>3</sub>):**  $\delta$  8.09 – 8.05 (m, 1H, H<sub>7</sub>), 7.35 – 7.30 (m, 2H, H<sub>11</sub>), 7.26 – 7.21 (m, 2H, H<sub>16</sub>), 7.20 – 7.00 (m, 9H, H<sub>4</sub>, H<sub>5</sub>, H<sub>6</sub>, H<sub>12</sub>, H<sub>13</sub>, H<sub>17</sub> and H<sub>18</sub>), 6.05 (s, 1H, H<sub>14</sub>), 5.89 (s, 1H, NH), 1.36 (s, 9H, H<sub>21</sub>), 0.84 (s, 9H, H<sub>1</sub>).

**<sup>13</sup>C NMR (75 MHz, CDCl<sub>3</sub>):**  $\delta$  170.6, 169.6, 147.3, 136.6, 135.8, 134.7, 133.2, 132.0, 130.6, 129.5, 128.6, 128.4, 128.0, 127.4, 125.5, 67.9, 51.7, 36.1, 32.2, 28.8, N.B. The peak at 129.5 ppm corresponds to two overlapping signals.

**FTIR (cm<sup>-1</sup>):** 3351, 3063, 2972, 1683, 1614, 1539, 1364, 730, 695, 561.

**Melting Point (°C):** 141 – 142.

**HRMS (ESI):** Exact mass calculated for C<sub>29</sub>H<sub>35</sub>N<sub>2</sub>O<sub>2</sub><sup>+</sup> [M+H]<sup>+</sup>: 443.2693, found: 443.2704.  $\Delta$  = 2.5 ppm.

***rac*-(*S<sub>a</sub>*,*R*)- N-(2-(*tert*-butyl)phenyl)-N-(2-(*tert*-butylamino)-2-oxo-1-(*m*-tolyl)ethyl)benzamide, *syn*-1f**

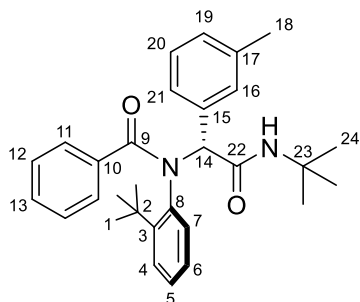

2-*tert*-Butylaniline (37 mg, 0.25 mmol, 1.0 eq.), benzoic acid (28 mg, 0.25 mmol, 1.0 eq.), 3-methylbenzaldehyde (30  $\mu$ L, 0.25 mmol, 1.0 eq.), 2,2,2-trifluoroethanol (0.5 mL, 0.5 M) and *tert*-butyl isocyanide (28  $\mu$ L, 0.25 mmol, 1.0 eq.) were subjected to **General Procedure B**. Purification via column chromatography eluting with petrol 40-60/ Et<sub>2</sub>O 75:25, afforded the title compound *syn*-1f as a white solid (93 mg, 81% yield, 92:8 d.r.). An analytically pure sample of the *syn*-diastereoisomer was obtained by further column chromatography (petrol 40-60/Et<sub>2</sub>O 70:30).

**<sup>1</sup>H NMR (CDCl<sub>3</sub>, 400 MHz):**  $\delta_{\text{H}}$  8.05 (dd,  $J = 7.7, 1.8$  Hz, 1H, H<sub>7</sub>), 7.35 – 7.30 (m, 2H, H<sub>11</sub>), 7.19 – 7.14 (m, 1H, H<sub>20</sub>), 7.13 – 6.99 (m, 8H, H<sub>4</sub>, H<sub>5</sub>, H<sub>6</sub>, H<sub>12</sub>, H<sub>13</sub>, H<sub>16</sub>, H<sub>19</sub>), 6.96 – 6.93 (m, 1H, H<sub>21</sub>), 5.98 (s, 1H, H<sub>14</sub>), 5.85 (s, 1H, NH), 2.15 (s, 3H, H<sub>18</sub>), 1.36 (s, 9H, H<sub>24</sub>), 0.85 (s, 9H, H<sub>1</sub>).

**<sup>13</sup>C NMR (101 MHz, CDCl<sub>3</sub>):**  $\delta_{\text{C}}$  170.5, 169.7, 147.3, 137.5, 136.7, 135.9, 134.8, 133.1, 132.8, 130.5, 129.6, 129.5, 129.3, 129.0, 128.3, 127.9, 127.4, 125.4, 67.9, 51.7, 36.1, 32.2, 28.8, 21.3.

**IR (cm<sup>-1</sup>):** 3340, 2972, 2905, 1679, 1623, 1362, 1242.

**Melting point (°C):** 149 – 151.

**HRMS (ESI):** Exact mass calculated for C<sub>30</sub>H<sub>37</sub>N<sub>2</sub>O<sub>2</sub><sup>+</sup> [M+H]<sup>+</sup> 457.2850, found 457.2854  $\Delta = 0.9$  ppm.

***rac*-(*S<sub>a</sub>*,*R*)-*N*-(2-(*tert*-Butyl)phenyl)-*N*-(2-(*tert*-butylamino)-2-oxo-1-(3-(trifluoromethoxy)phenyl)ethyl)benzamide, *syn*-1h**

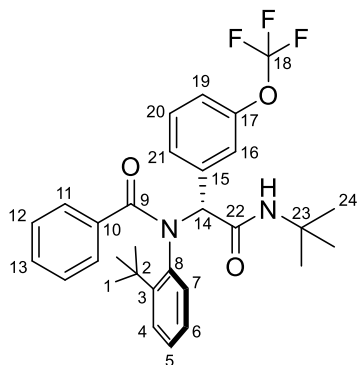

2-*tert*-Butylaniline (37 mg, 0.25 mmol, 1.0 eq.), benzoic acid (31 mg, 0.25 mmol, 1.0 eq.), 3-trifluoromethoxybenzaldehyde (36  $\mu$ L, 0.25 mmol, 1.0 eq.), 2,2,2-trifluoroethanol (0.5 mL, 0.5 M) and *tert*-butyl isocyanide (28  $\mu$ L, 0.25 mmol, 1.0 eq.) were subjected to **General Procedure B**. Purification via column chromatography eluting with petrol 40-60/Et<sub>2</sub>O 70:30, afforded the title compound *syn*-**1h** as a white solid (119 mg, 90% yield, 93:7 d.r.). An analytically pure sample of the *syn*-diastereoisomer was obtained by further column chromatography (petrol 40-60/Et<sub>2</sub>O 70:30).

**<sup>1</sup>H NMR (400 MHz, CDCl<sub>3</sub>):**  $\delta_{\text{H}}$  7.97 (dd,  $J = 7.5, 1.8$  Hz, 1H, H<sub>7</sub>), 7.30 (d,  $J = 7.7$  Hz, 2H, H<sub>11</sub>), 7.23 – 7.00 (m, 10H, H<sub>Ar</sub>), 6.15 (br s, 1H, NH), 6.09 (s, 1H, H<sub>14</sub>), 1.37 (s, 9H, H<sub>24</sub>), 0.82 (s, 9H, H<sub>1</sub>).

**<sup>13</sup>C NMR (101 MHz, CDCl<sub>3</sub>):**  $\delta_{\text{C}}$  170.7, 169.0, 148.8, 147.3, 136.3, 135.5, 135.4, 134.2, 130.9, 130.6, 129.7, 129.5, 129.2, 128.8, 127.5, 125.9, 124.9, 121.4, 120.4 (q,  $J = 257.4$  Hz), 67.0, 51.9, 36.1, 32.1, 28.8.

**<sup>19</sup>F{<sup>1</sup>H} NMR (376 MHz, CDCl<sub>3</sub>):**  $\delta_{\text{F}}$  -57.8.

**FTIR (cm<sup>-1</sup>):** 3344, 2971, 2919, 1685, 1623, 1250, 1163.

**Melting point (°C):** 154 – 157.

**HRMS (ESI):** Exact mass calculated for C<sub>30</sub>H<sub>33</sub>F<sub>3</sub>N<sub>2</sub>O<sub>3</sub>Na<sup>+</sup> [M+Na]<sup>+</sup> 549.2335, found 549.2344.  $\Delta = 1.6$  ppm.

***rac*-(*S<sub>a</sub>*,*R*)- N-(2-(*tert*-Butyl)phenyl)-N-(2-(*tert*-butylamino)-2-oxo-1-phenylethyl)nicotinamide, *syn*-1x**

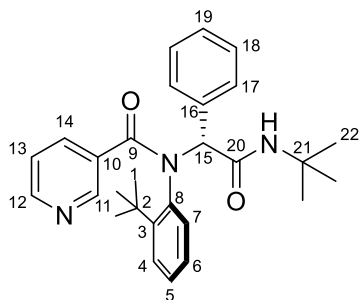

2-*tert*-Butylaniline (180 mg, 1.20 mmol, 1.0 eq.), nicotinic acid (148 mg, 1.20 mmol, 1.0 eq.), benzaldehyde (127 mg, 1.20 mmol, 1.0 eq.), 2,2,2-trifluoroethanol (2.4 mL, 0.5 M) and *tert*-butyl isocyanide (136  $\mu$ L, 1.20 mmol, 1.0 eq.) were subjected to **General Procedure B**. Purification via column chromatography eluting with petrol 40-60/EtOAc 40:60, afforded the title compound *syn*-1x as a white solid (389 mg, 73% yield, 90:10 d.r.). An analytically pure sample of the *syn*-diastereoisomer was obtained by further column chromatography (petrol 40-60/EtOAc 40:60).

**<sup>1</sup>H NMR (400 MHz, CDCl<sub>3</sub>):**  $\delta_{\text{H}}$  8.58 (d,  $J = 2.3$  Hz, 1H, H<sub>11</sub>), 8.40 (dd,  $J = 4.9, 1.7$  Hz, 1H, H<sub>12</sub>), 8.12 (dd,  $J = 7.6, 1.9$  Hz, 1H, H<sub>7</sub>), 7.57 (dt,  $J = 8.0, 2.0$  Hz, 1H, H<sub>14</sub>), 7.24 – 7.20 (m, 2H, H<sub>17</sub>), 7.17 – 7.09 (m, 5H, H<sub>5</sub>, H<sub>6</sub>, H<sub>18</sub> and H<sub>19</sub>), 7.09 – 7.01 (m, 2H, H<sub>4</sub> and H<sub>13</sub>), 6.00 (s, 1H, H<sub>15</sub>), 5.65 (s, 1H, NH), 1.34 (s, 9H, H<sub>22</sub>), 0.85 (s, 9H, H<sub>1</sub>).

**<sup>13</sup>C NMR (101 MHz, CDCl<sub>3</sub>):**  $\delta_{\text{C}}$  169.3, 168.2, 150.3, 150.0, 147.3, 136.9, 135.2, 134.6, 132.9, 132.7, 132.0, 130.8, 129.0, 128.9, 128.2, 125.9, 122.3, 68.1, 51.9, 36.1, 32.3, 28.8.

**FTIR (cm<sup>-1</sup>):** 3245, 2981, 1682, 1640, 1563, 1380, 1155, 1095, 954.

**Melting point (°C):** 172 – 173.

**HRMS (ESI):** Exact mass calculated for C<sub>28</sub>H<sub>34</sub>N<sub>3</sub>O<sub>2</sub><sup>+</sup> [M+H]<sup>+</sup>: 444.2646, found 444.2650.  $\Delta = 0.9$  ppm.



***rac*-(*S<sub>a</sub>*,*R*)- N-(2-(*tert*-Butyl)phenyl)-N-(2-(*tert*-butylamino)-2-oxo-1-phenylethyl)furan-2-carboxamide, *syn*-**1y****

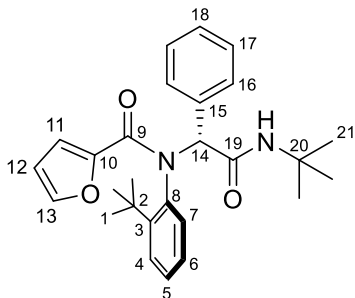

2-*tert*-Butylaniline (180 mg, 1.20 mmol, 1.0 eq.), 2-furoic acid (135 mg, 1.20 mmol, 1.0 eq.), benzaldehyde (122  $\mu$ L, 1.20 mmol, 1.0 eq.), 2,2,2-trifluoroethanol (2.4 mL, 0.5 M) and *tert*-butyl isocyanide (136  $\mu$ L, 1.20 mmol, 1.0 eq.) were subjected to **General Procedure B**. Purification via column chromatography eluting with petrol 40-60/Et<sub>2</sub>O 70:30, afforded the title compound *syn*-**1y** as a white solid (436 mg, 84% yield, 89:11 d.r.). An analytically pure sample of the *syn*-diastereoisomer was obtained by further column chromatography (petrol 40-60/Et<sub>2</sub>O 70:30).

**<sup>1</sup>H NMR (400 MHz, CDCl<sub>3</sub>):**  $\delta_{\text{H}}$  7.90 (d,  $J = 7.2$  Hz, 1H, H<sub>7</sub>), 7.39 (d,  $J = 1.9$  Hz, 1H, H<sub>11</sub>), 7.30 – 7.25 (m, 2H, H<sub>4</sub> and H<sub>5</sub>), 7.24 – 7.08 (m, 6H, H<sub>6</sub>, H<sub>16</sub>, H<sub>17</sub>, H<sub>18</sub>), 6.13 (dd,  $J = 3.6, 1.8$  Hz, 1H, H<sub>12</sub>), 5.94 (br s, 1H, NH), 5.91 (s, 1H, H<sub>14</sub>), 5.20 (d,  $J = 3.6$  Hz, 1H, H<sub>13</sub>), 1.32 (s, 9H, H<sub>21</sub>), 0.91 (s, 9H, H<sub>1</sub>).

**<sup>13</sup>C NMR (101 MHz, CDCl<sub>3</sub>):**  $\delta_{\text{C}}$  169.2, 160.2, 148.2, 147.3, 144.8, 136.0, 134.0, 133.0, 132.0, 130.6, 129.2, 128.7, 128.1, 126.6, 117.0, 111.1, 67.9, 51.6, 36.4, 32.3, 28.8.

**FTIR (cm<sup>-1</sup>):** 3351, 2969, 1694, 1619, 1029, 760.

**Melting point (°C):** 173 – 175.

**HRMS (ESI):** Exact mass calculated for C<sub>27</sub>H<sub>32</sub>N<sub>2</sub>O<sub>3</sub>Na<sup>+</sup> [M+Na]<sup>+</sup> 455.2305, found 455.2301  $\Delta = -0.9$  ppm.

***rac*-(*S<sub>a</sub>*,*R*)- N-(2-(*tert*-butyl)phenyl)-N-(2-(*tert*-butylamino)-2-oxo-1-phenylethyl)-3-phenylpropanamide, *syn*-1z**

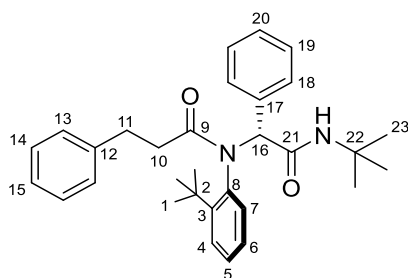

According to a modification of **General Procedure B**. To an oven-dried Schlenk tube, equipped with stirrer bar, was sequentially charged 2-*tert*-butylaniline (180 mg, 1.20 mmol, 1.0 eq.), hydrocinnamic acid (180 mg, 1.20 mmol, 1.0 eq.), benzaldehyde (122  $\mu$ L, 1.20 mmol, 1.0 eq.), 2,2,2-trifluoroethanol (2.4 mL, 0.5 M) and *tert*-butyl isocyanide (136  $\mu$ L, 1.20 mmol, 1.0 eq). The solution was stirred at room temperature for 16h. Dimethyl sulfoxide (2.4 mL, 0.5 M) was then charged, and the solution was heated to 110 °C for 6 days. After this time, the solution was cooled to room temperature and the reaction mixture was concentrated to dryness. This was followed by the addition of EtOAc and saturated  $\text{Na}_2\text{CO}_3$  to the crude residue. The layers were separated, and the aqueous layer was extracted twice with EtOAc. The combined organics were washed once with brine, dried over  $\text{MgSO}_4$ , filtered, and concentrated *in vacuo*. The crude residue was purified by column chromatography (petrol 40-60/ $\text{Et}_2\text{O}$  80:20) to afford *syn*-1z as an off-white solid (369 mg, 65% yield, 90:10 d.r.). An analytically pure sample of the *syn*-diastereoisomer was obtained by further column chromatography (petrol 40-60/ $\text{Et}_2\text{O}$  80:20).

**$^1\text{H}$  NMR (400 MHz,  $\text{CDCl}_3$ ):**  $\delta_{\text{H}}$  7.73 (d,  $J = 7.2$  Hz, 1H,  $\text{H}_7$ ), 7.29 – 6.98 (m, 13H,  $\text{H}_{\text{Ar}}$ ), 5.85 (s, 1H, NH), 5.77 (s, 1H,  $\text{H}_{16}$ ), 3.05 – 2.87 (m, 2H,  $\text{H}_{11}$  and  $\text{H}_{11'}$ ), 2.42 (ddd,  $J = 15.8, 9.6, 6.1$  Hz, 1H,  $\text{H}_{10}$ ), 2.32 (ddd,  $J = 16.2, 9.9, 6.4$  Hz, 1H,  $\text{H}_{10'}$ ), 1.31 (s, 9H,  $\text{H}_{23}$ ), 0.95 (s, 9H,  $\text{H}_1$ ).

**$^{13}\text{C}$  NMR (101 MHz,  $\text{CDCl}_3$ ):**  $\delta_{\text{C}}$  173.6, 169.5, 147.3, 141.5, 136.4, 133.6, 133.2, 131.8, 130.6, 128.7, 128.6, 128.6, 128.5, 128.1, 126.7, 126.0, 67.2, 51.5, 38.5, 36.3, 32.4, 31.3, 28.8.

**FTIR ( $\text{cm}^{-1}$ ):** 3342, 2982, 1684, 1634, 1545, 1489, 1393, 700, 543.

**Melting Point ( $^{\circ}\text{C}$ ):** 108 – 109.

**HRMS (ESI):** Exact mass calculated for  $\text{C}_{31}\text{H}_{39}\text{N}_2\text{O}_2^+$  [ $\text{M}+\text{H}$ ] $^+$ : 471.3006, found: 471.3001.  $\Delta = -1.1$  ppm.

***rac*-(*S<sub>a</sub>*,*R*)-*N*-(2-(*tert*-Butyl)phenyl)-*N*-(2-(cyclohexylamino)-2-oxo-1-phenylethyl)benzamide, *syn*-1ai**

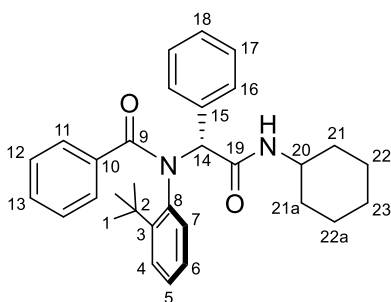

2-*tert*-Butylaniline (180 mg, 1.20 mmol, 1.0 eq.), benzoic acid (147 mg, 1.20 mmol, 1.0 eq.), benzaldehyde (122  $\mu$ L, 1.20 mmol, 1.0 eq.), 2,2,2-trifluoroethanol (2.4 mL, 0.5 M) and cyclohexyl isocyanide (149  $\mu$ L, 1.20 mmol, 1.0 eq.) were subjected to **General Procedure B**. Purification via column chromatography eluting with petrol 40-60/Et<sub>2</sub>O 70:30, afforded the title compound *syn*-1ai as a white solid (423 mg, 75% yield, 94:6 d.r.). An analytically pure sample of the *syn*-diastereoisomer was obtained by further column chromatography (petrol 40-60/Et<sub>2</sub>O 65:35).

**<sup>1</sup>H NMR (400 MHz, CDCl<sub>3</sub>)**  $\delta_{\text{H}}$  8.05 (dd,  $J = 7.0, 2.2$  Hz, 1H, H<sub>7</sub>), 7.36 – 7.30 (m, 2H, H<sub>11</sub>), 7.24 – 7.20 (m, 2H, H<sub>16</sub>), 7.19 – 7.06 (m, 8H, H<sub>Ar</sub>), 7.06 – 7.03 (m, 1H, H<sub>4</sub>), 6.12 (s, 1H, H<sub>14</sub>), 5.89 (d,  $J = 8.1$  Hz, 1H, NH), 3.91 – 3.77 (m, 1H, H<sub>20</sub>), 2.02 (m, 1H, H<sub>Cy</sub>), 1.86 – 1.78 (m, 1H, H<sub>Cy</sub>), 1.72 – 1.51 (m, 3H, H<sub>Cy</sub>), 1.39 – 1.28 (m, 2H, H<sub>Cy</sub>), 1.24 – 0.98 (m, 3H, H<sub>Cy</sub>), 0.85 (s, 9H, H<sub>1</sub>).

**<sup>13</sup>C NMR (101 MHz, CDCl<sub>3</sub>)**  $\delta_{\text{C}}$  170.7, 169.6, 147.4, 136.6, 136.0, 134.5, 133.2, 132.0, 130.6, 129.5, 129.5, 128.7, 128.4, 128.1, 127.4, 125.6, 67.7, 49.0, 36.1, 33.0, 32.8, 32.2, 25.6, 24.9, 24.9.

**FTIR (cm<sup>-1</sup>):** 3270, 2982, 2934, 1643, 1354, 696.

**Melting Point (°C):** 158 – 160.

**HRMS (ESI):** Exact mass calculated for C<sub>31</sub>H<sub>37</sub>N<sub>2</sub>O<sub>2</sub><sup>+</sup> [M+H]<sup>+</sup>: 469.2850, found 469.2852.  $\Delta = 0.4$  ppm.

***rac*-(*S<sub>a</sub>*,*R*)-*N*-(2-(*tert*-butylamino)-2-oxo-1-phenylethyl)-*N*-(2-iodo-4,6-dimethylphenyl)benzamide, *syn*-**1am****

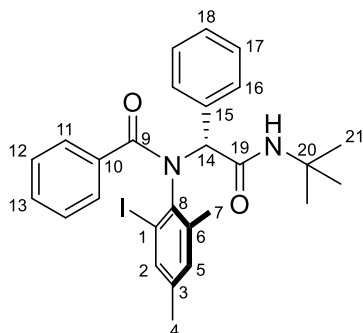

According to a modification of **General Procedure B**. To an oven-dried Schlenk tube, equipped with stirrer bar, was sequentially charged 2-iodo-4,6-dimethylaniline (297 mg, 1.20 mmol, 1.0 eq.), benzoic acid (147 mg, 1.20 mmol, 1.0 eq.), benzaldehyde (122  $\mu$ L, 1.20 mmol, 1.0 eq.), 2,2,2-trifluoroethanol (2.4 mL, 0.5 M) and *tert*-butyl isocyanide (136  $\mu$ L, 1.20 mmol, 1.0 eq). The mixture was stirred at room temperature for 24 hours. After this time a further portion of *tert*-butyl isocyanide (136  $\mu$ L, 1.20 mmol, 1.0 eq.) was charged and stirred for a further 24 hours. The reaction was then concentrated to dryness and redissolved in dimethylsulfoxide (2.4 mL, 0.5 M), after which the reaction was heated to 150  $^{\circ}$ C for 5 hours in the dark. The solution was then cooled to room temperature and the reaction mixture was concentrated to dryness. The crude residue was purified by column chromatography (petrol 40-60/Et<sub>2</sub>O 60:40) to afford *syn*-**1am** as an off-white solid (360 mg, 56% yield, 90:10 d.r.). An analytically pure sample of the *syn*-diastereoisomer was obtained by further column chromatography (petrol 40-60/EtOAc 83:17).

**<sup>1</sup>H NMR (400 MHz, CDCl<sub>3</sub>):**  $\delta_{\text{H}}$  7.49 – 7.42 (m, 4H, H<sub>11</sub> and H<sub>16</sub>), 7.27 – 7.08 (m, 7H, H<sub>2</sub>, H<sub>12</sub>, H<sub>13</sub>, H<sub>17</sub> and H<sub>18</sub>), 6.65 (s, 1H, H<sub>5</sub>), 5.93 (br s, 1H, NH), 5.54 (s, 1H, H<sub>14</sub>), 2.36 (s, 3H, H<sub>7</sub>), 2.03 (s, 3H, H<sub>4</sub>), 1.38 (s, 9H, H<sub>21</sub>).

**<sup>13</sup>C NMR (101 MHz, CDCl<sub>3</sub>):**  $\delta_{\text{C}}$  171.7, 168.4, 140.4, 139.5, 139.3, 137.9, 136.3, 133.2, 131.9, 130.9, 130.0, 128.6, 128.1, 127.9, 127.5, 103.9, 67.9, 51.7, 28.8, 20.4, 20.1.

**IR (cm<sup>-1</sup>)** 3349, 2971, 2923, 1689, 1645, 1335, 697.

**Melting Point ( $^{\circ}$ C):** 90 – 93.

**HRMS (ESI):** Exact mass calculated for C<sub>27</sub>H<sub>29</sub>N<sub>2</sub>INaO<sub>2</sub><sup>+</sup> [M+Na]<sup>+</sup>: 563.1166, found 563.1163.

$\Delta$  -0.5 ppm.

***rac*-(*S<sub>a</sub>*,*R*)-*N*-(8-Bromonaphthalen-1-yl)-*N*-(2-(*tert*-butylamino)-2-oxo-1-phenylethyl)benzamide, *syn*-1as**

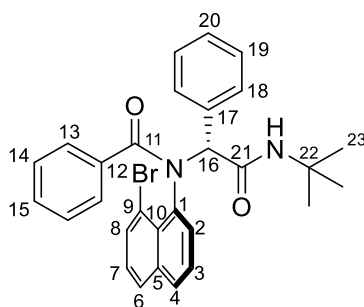

8-Bromonaphthalen-1-amine (67 mg, 0.30 mmol, 1.0 eq.), benzoic acid (37 mg, 0.30 mmol, 1.0 eq.), benzaldehyde (31  $\mu$ L, 0.3 mmol, 1.0 eq.), 2,2,2-trifluoroethanol (0.6 mL, 0.5 M) and *tert*-butyl isocyanide (34  $\mu$ L, 0.30 mmol, 1.0 eq.) were subjected to **General Procedure B**. Purification *via* column chromatography eluting with petrol 40-60/Et<sub>2</sub>O 60:40 afforded the title compound *syn*-1as as a light orange solid (129 mg, 84% yield, 92:8 d.r.). An analytically pure sample of the *syn*-diastereoisomer was obtained by further column chromatography (petrol 40-60/Et<sub>2</sub>O 65:35).

**<sup>1</sup>H NMR (400 MHz, CDCl<sub>3</sub>):**  $\delta_{\text{H}}$  8.12 (d, *J* = 7.3 Hz, 1H, H<sub>2</sub>), 7.63 (d, *J* = 7.4 Hz, 1H, H<sub>8</sub>), 7.53 – 7.47 (m, 2H, H<sub>4</sub> + H<sub>6</sub>), 7.36 – 7.32 (m, 2H, H<sub>13</sub>), 7.29 – 7.23 (m, 3H, H<sub>3</sub> + H<sub>18</sub>), 7.05 – 6.95 (m, 4H, H<sub>Af</sub>), 6.91 – 6.80 (m, 3H, H<sub>Af</sub>), 5.96 (s, 1H, H<sub>16</sub>), 5.60 (s, 1H, NH), 1.39 (s, 9H, H<sub>23</sub>).

**<sup>13</sup>C NMR (101 MHz, CDCl<sub>3</sub>):**  $\delta_{\text{C}}$  170.9, 169.7, 136.9, 135.8, 135.3, 134.5, 134.2, 133.1, 131.0, 129.9, 129.4, 129.0, 129.0, 128.3, 128.1, 127.6, 127.4, 125.8, 125.3, 116.7, 68.1, 51.8, 28.8.

**FTIR (cm<sup>-1</sup>):** 3442, 2968, 1682, 1635, 1364.

**Melting Point (°C):** 194-196.

**HRMS (ESI):** Exact mass calculated for C<sub>29</sub>H<sub>28</sub>BrN<sub>2</sub>O<sub>2</sub><sup>+</sup> [M+H]<sup>+</sup>: 515.1329, found 515.1326.  $\Delta$  = - 0.6 ppm.

***rac*-(*S<sub>a</sub>*,*R*)- N-(2-(*tert*-butyl)phenyl)-N-(2-(cyclohexylamino)-2-oxo-1-phenylethyl)-2,4-dimethylthiazole-5-carboxamide, *syn*-1aw**

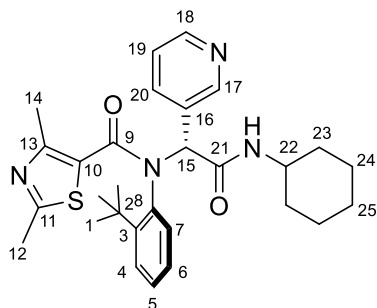

2-*tert*-Butylaniline (180 mg, 1.20 mmol, 1.0 eq.), 2,4-dimethyl-1,3-thiazole-5-carboxylic acid (189 mg, 1.20 mmol, 1.0 eq.), 3-pyridinecarboxaldehyde (113  $\mu$ L, 1.20 mmol, 1.0 eq.), 2,2,2-trifluoroethanol (2.4 mL, 0.5 M) and cyclohexyl isocyanide (149  $\mu$ L, 1.20 mmol, 1.0 eq) were subjected to **General Procedure B**. Purification via column chromatography eluting with Et<sub>2</sub>O, afforded the title compound *syn*-1aw as a pale brown solid (209 mg, 35% yield, 89:11 d.r.). An analytically pure sample of the *syn*-diastereoisomer (>95:5 d.r.) was obtained by recrystallization from boiling hexane/EtOAc, which was used for biological testing.

**<sup>1</sup>H NMR (400 MHz, CDCl<sub>3</sub>):**  $\delta$ <sub>H</sub> 8.51 (d, *J* = 2.5 Hz, 1H, H<sub>17</sub>), 8.43 (dd, *J* = 4.8, 1.6 Hz, 1H, H<sub>18</sub>), 7.93 – 7.85 (m, 1H, H<sub>7</sub>), 7.38 (dt, *J* = 8.2, 2.0 Hz, 1H, H<sub>20</sub>), 7.35 – 7.22 (m, 3H, H<sub>4</sub>, H<sub>5</sub> and H<sub>6</sub>), 7.01 (dd, *J* = 8.1, 4.8 Hz, 1H, H<sub>19</sub>), 6.30 – 6.17 (m, 1H, NH), 6.08 (s, 1H, H<sub>15</sub>), 3.85 – 3.74 (m, 1H, H<sub>22</sub>), 2.71 (s, 3H, H<sub>14</sub>), 2.44 (s, 3H, H<sub>12</sub>), 2.08 – 1.53 (m, 5H, H<sub>Cy</sub>), 1.43 – 0.98 (m, 5H, H<sub>Cy</sub>), 0.90 (s, 9H, H<sub>1</sub>).

**<sup>13</sup>C NMR (101 MHz, CDCl<sub>3</sub>):**  $\delta$ <sub>C</sub> 168.7, 167.8, 164.5, 160.4, 152.4, 150.0, 148.8, 139.3, 135.0, 134.6, 131.3, 130.2, 129.3, 126.9, 122.9, 122.7, 64.6, 49.1, 36.3, 32.9, 32.8, 32.2, 25.6, 24.9, 24.8, 18.7, 18.7.

**FTIR (cm<sup>-1</sup>):** 2972, 2931, 2855, 1662, 1625, 1490, 1375, 1344, 763, 732.

**Melting Point (°C):** 229 – 230.

**HRMS (ESI):** Exact mass calculated for C<sub>29</sub>H<sub>37</sub>N<sub>4</sub>O<sub>2</sub>S<sup>+</sup> [M+H]<sup>+</sup>: 505.2632, found: 505.2642.  $\Delta$  = 2.0 ppm.

#### 4. *X-ray crystallography*

Single crystal diffraction data were collected on an XtaLAB Synergy HyPix-Arc 100 diffractometer using copper radiation ( $\lambda_{\text{CuK}\alpha} = 1.54184 \text{ \AA}$ ) at 150 K using an Oxford Cryosystems CryostreamPlus open-flow  $\text{N}_2$  cooling device. Intensities were corrected for absorption using a multifaceted crystal model created by indexing the faces of the crystal for which data were collected.<sup>[3]</sup> Cell refinement, data collection and data reduction were undertaken via the software CrysAlisPro.<sup>[4]</sup>

All structures were solved using XT<sup>[5]</sup> and refined by XL<sup>[6]</sup> using the Olex2 interface.<sup>[7]</sup> All non-hydrogen atoms were refined anisotropically and hydrogen atoms were positioned with idealised geometry, with the exception of those bound to heteroatoms, the positions of which were located using peaks in the Fourier difference map. The displacement parameters of the hydrogen atoms were constrained using a riding model with  $U_{(\text{H})}$  set to be an appropriate multiple of the  $U_{\text{eq}}$  value of the parent atom.

## 5. Computational Modelling

### 5.1. Computational methods

All conformational searches were performed using MacroModel (Version 13.6)<sup>[8]</sup> in the gas phase utilizing the MMFF force field<sup>[9-14]</sup> and a mixture of Low Mode following and Monte Carlo search algorithms.<sup>[15,16]</sup> Quantum mechanical calculations were carried out using ORCA 5.0.2.<sup>[17]</sup> The molecular geometries were optimized using the PBE0-D3 functional<sup>[18,19]</sup> with the def2-TZVP basis set<sup>[20,21]</sup>. The optimisations were done using the implicit SMD solvent model.<sup>[22]</sup> Single-point energies were calculated using  $\omega$ B97M-V functional,<sup>[23]</sup> def2-TZVP basis set and SMD solvent model.

Frequency calculations were performed on all structures and confirmed to contain no imaginary frequencies or just one imaginary frequency for ground states and transition states, respectively. Full set of DFT output files with optimized structures, frequencies and high-level single-point energies are provided in the accompanied archive. The archive structure is shown below in section 5.2.

### 5.2. Summary of the associated computational dataset contents

This dataset contains ORCA DFT output files of the key ground-states and transition state DFT optimized structures. The dataset contains 122 files in total. The data is organized to match the structure numbering in Scheme 3 in the manuscript. Each of the subfolders correspond to a step in the reaction pathway, and an additional folder for benzoic acid data. Each of the subfolders contain the output of the final optimization calculation (\*opt\*.out), frequency calculation (\*freq.out) and single-point optimization (\*\_single\_point.out). All optimized geometries are also provided as \*.xyz files for even better usability. The full dataset structure is shown below.

All of the files can be opened in any text editor. ORCA output structures can be viewed and the frequency modes visualised in Avogadro, jmol and in most other molecular viewers/editors. \*.xyz files can be viewed in essentially all 3D molecular editors and viewers.

```
|— BzOH
|   |— BzOH_single_point.out
|   |— BzOHfreq.out
|   |— BzOHopt.out
|   |— BzOHopt.xyz
|— _1_2a
|   |— ImineE1_single_point.out
|   |— ImineE1freq.out
|   |— ImineE1opt.out
```



- lmineE1opt.xyz
- lmineE2\_single\_point.out
- lmineE2freq.out
- lmineE2opt.out
- lmineE2opt.xyz
- lmineE3\_single\_point.out
- lmineE3freq.out
- lmineE3opt.out
- lmineE3opt.xyz
- lmineZ1\_single\_point.out
- lmineZ1freq.out
- lmineZ1opt.out
- lmineZ1opt.xyz
- lmineZ2\_single\_point.out
- lmineZ2freq.out
- lmineZ2opt.out
- lmineZ2opt.xyz
- lmineZ3\_single\_point.out
- lmineZ3freq.out
- lmineZ3opt.out
- lmineZ3opt.xyz
- lmineZ4\_single\_point.out
- lmineZ4freq.out
- lmineZ4optb.out
- lmineZ4optb.xyz
- lmineZ5\_single\_point.out
- lmineZ5freq.out
- lmineZ5opt.out
- lmineZ5opt.xyz
- lmineZ6\_single\_point.out
- lmineZ6freq.out
- lmineZ6opt.out
- lmineZ6opt.xyz
- 2\_lmine-BzOH
- lmineBzOH10rAfreq.out
- lmineBzOH10r\_single\_point.out
- lmineBzOH10rfreq.out
- lmineBzOH10ropt.out
- lmineBzOH10ropt.xyz
- lmineBzOH11rAfreq.out
- lmineBzOH11r\_single\_point.out
- lmineBzOH11rfreq.out
- lmineBzOH11ropt.out
- lmineBzOH11ropt.xyz
- lmineBzOH12rAfreq.out
- lmineBzOH12r\_single\_point.out
- lmineBzOH12ropt.out
- lmineBzOH12ropt.xyz
- lmineBzOH1Afreq.out
- lmineBzOH1\_single\_point.out
- lmineBzOH1opt.out

- ImineBzOH1opt.xyz
- ImineBzOH2Afreq.out
- ImineBzOH2\_single\_point.out
- ImineBzOH2optb.out
- ImineBzOH2optb.xyz
- ImineBzOH3Afreq.out
- ImineBzOH3\_single\_point.out
- ImineBzOH3opt.out
- ImineBzOH3opt.xyz
- ImineBzOH4Afreq.out
- ImineBzOH4\_single\_point.out
- ImineBzOH4optb.out
- ImineBzOH4optb.xyz
- ImineBzOH5Afreq.out
- ImineBzOH5\_single\_point.out
- ImineBzOH5optc.out
- ImineBzOH5optc.xyz
- ImineBzOH6Afreq.out
- ImineBzOH6\_single\_point.out
- ImineBzOH6opt.out
- ImineBzOH6opt.xyz
- ImineBzOH7Afreq.out
- ImineBzOH7\_single\_point.out
- ImineBzOH7opt.out
- ImineBzOH7opt.xyz
- ImineBzOH8rAfreq.out
- ImineBzOH8r\_single\_point.out
- ImineBzOH8ropt.out
- ImineBzOH8ropt.xyz
- ImineBzOH9Afreq.out
- ImineBzOH9\_single\_point.out
- ImineBzOH9opt.out
- ImineBzOH9opt.xyz
- \_3\_3a
- IminiumBzOate1\_single\_point.out
- IminiumBzOate1freq.out
- IminiumBzOate1opt.out
- IminiumBzOate1opt.xyz
- IminiumBzOate2\_single\_point.out
- IminiumBzOate2freq.out
- IminiumBzOate2opt.out
- IminiumBzOate2opt.xyz
- IminiumBzOate3\_single\_point.out
- IminiumBzOate3freq.out
- IminiumBzOate3optb.out
- IminiumBzOate3optb.xyz
- IminiumBzOate4\_single\_point.out
- IminiumBzOate4freq.out
- IminiumBzOate4optb.out
- IminiumBzOate4optb.xyz
- IminiumBzOate\_R3\_single\_point.out

- IminiumBzOate\_R3freq.out
- IminiumBzOate\_R3opt.out
- IminiumBzOate\_R3opt.xyz
- IminiumBzOate\_S3\_single\_point.out
- IminiumBzOate\_S3freq.out
- IminiumBzOate\_S3optb.out
- IminiumBzOate\_S3optb.xyz
- \_4\_TS
- ImineBzOHTS\_R3B\_single\_point.out
- ImineBzOHTS\_R3Btsopt.out
- ImineBzOHTS\_R3Btsopt.xyz
- ImineBzOHTS\_R3Cfreq.out
- ImineBzOHTS\_S3D\_single\_point.out
- ImineBzOHTS\_S3Dfreq.out
- ImineBzOHTS\_S3Dtsoptc.out
- ImineBzOHTS\_S3Dtsoptc.xyz
- \_5\_1a-BzOH
- AmidiniumBzoateR3\_single\_point.out
- AmidiniumBzoateR3freq.out
- AmidiniumBzoateR3opt.out
- AmidiniumBzoateR3opt.xyz
- AmidiniumBzoateS3B\_single\_point.out
- AmidiniumBzoateS3Bfreq.out
- AmidiniumBzoateS3Boptc.out
- AmidiniumBzoateS3Boptc.xyz
- ImineBzOH6post\_single\_point.out
- ImineBzOH6postfreq.out
- ImineBzOH6postopt.out
- ImineBzOH6postopt.xyz
- ImineBzOH8rpost\_single\_point.out
- ImineBzOH8rpostfreq.out
- ImineBzOH8rpostopt.out
- ImineBzOH8rpostopt.xyz
- \_6\_1a
- Prod\_RR1\_single\_point.out
- Prod\_RR1freq.out
- Prod\_RR1opt.out
- Prod\_RR1opt.xyz
- Prod\_RR2\_single\_point.out
- Prod\_RR2freq.out
- Prod\_RR2opt.out
- Prod\_RR2opt.xyz
- Prod\_RR3\_single\_point.out
- Prod\_RR3freq.out
- Prod\_RR3opt.out
- Prod\_RR3opt.xyz
- Prod\_RS1\_single\_point.out
- Prod\_RS1freq.out
- Prod\_RS1opt.out
- Prod\_RS1opt.xyz
- Prod\_RS2\_single\_point.out

- ├── Prod\_RS2freq.out
- ├── Prod\_RS2opt.out
- ├── Prod\_RS2opt.xyz
- ├── Prod\_RS3\_single\_point.out
- ├── Prod\_RS3freq.out
- ├── Prod\_RS3opt.out
- └── Prod\_RS3opt.xyz

## 6. *M. tuberculosis* inhibition

### 6.1 Results

**Table S1** – Antibacterial activity analysis of compounds *anti-1aw* and *syn-1aw* alongside control compounds (**S4**,<sup>[24]</sup> **RIF**, **INH**, **EMB** and **ETH**) was performed by REMA against drug susceptible and resistant *Mtb*, and *Mab*. Values correspond to minimum inhibitory concentrations (MIC) 90% and reported in  $\mu\text{M}$ . Values of “–” correspond to no activity observed at 64  $\mu\text{M}$ .

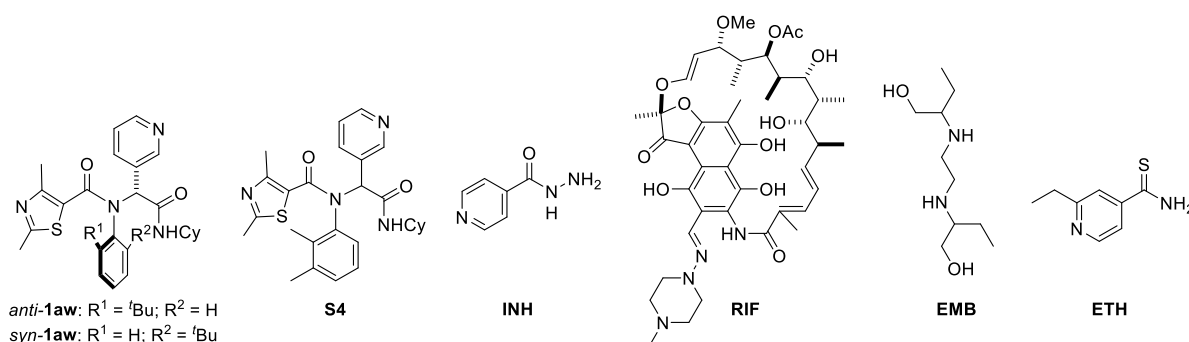

|                 | <i>Mtb</i> mc <sup>2</sup> 7902 | <i>Mtb</i> mc <sup>2</sup> 8245 INH <sup>R</sup> | <i>Mtb</i> mc <sup>2</sup> 8247 RIF <sup>R</sup> | <i>Mtb</i> mc <sup>2</sup> 8250 INH <sup>R</sup> RIF <sup>R</sup> | <i>Mab</i> NCTC 13031 |
|-----------------|---------------------------------|--------------------------------------------------|--------------------------------------------------|-------------------------------------------------------------------|-----------------------|
| <i>anti-1aw</i> | –                               | –                                                | –                                                | –                                                                 | –                     |
| <i>syn-1aw</i>  | 31.7 ± 1.470                    | 34.7 ± 0.955                                     | 33.6 ± 1.269                                     | 38.1 ± 0.314                                                      | –                     |
| <b>S4</b>       | 0.55 ± 0.004                    | 0.55 ± 0.049                                     | 0.48 ± 0.037                                     | 0.56 ± 0.033                                                      | –                     |
| <b>INH</b>      | 0.06 ± 0.006                    | –                                                | 0.06 ± 0.005                                     | –                                                                 | –                     |
| <b>RIF</b>      | 0.02 ± 0.001                    | 0.02 ± 0.003                                     | –                                                | –                                                                 | –                     |
| <b>EMB</b>      | 8.79 ± 0.567                    | 9.89 ± 0.332                                     | 9.69 ± 0.155                                     | 9.77 ± 0.487                                                      | –                     |
| <b>ETH</b>      | 6.02 ± 0.580                    | 6.11 ± 0.473                                     | 5.88 ± 0.457                                     | 6.51 ± 0.912                                                      | 16.23 ± 1.118         |

### 6.2 Materials and methods

Mycobacterial species were cultured in either Middlebrook 7H9 broth or Middlebrook 7H10 agar media supplemented with albumin–dextrose–catalase (ADC) or oleic acid–albumin–dextrose–catalase (OADC) enrichments purchased from BD Biosciences and 0.2% glycerol, 0.2% w/v casamino acids, 24  $\mu\text{g}/\text{mL}$  pantothenate, 200  $\mu\text{g}/\text{mL}$  arginine, 50  $\mu\text{g}/\text{mL}$  leucine, 1  $\mu\text{g}/\text{mL}$  penicillin G, and 10  $\mu\text{g}/\text{mL}$

cyclohexamide, (7H9OPALPen<sup>1</sup>Cyc<sup>10</sup>). All reagents were purchased from Sigma-Aldrich unless stated otherwise.

**Bacterial strains:** BSL2 mycobacterial species used in this study were all kindly supplied by Prof William R. Jacobs Jr (Table S3).<sup>[25]</sup> Non-mycobacterial strains were purchased from National Collection of Type Cultures, UK (Table S4).

**Bacterial Growth Inhibition Assays:** Bacterial minimum inhibition concentrations (MIC) were determined using the Resazurin Microtiter Assay (REMA) method according to Palomino *et al.*<sup>[26]</sup> Stock solutions of the tested compounds were prepared in sterile dimethyl sulfoxide (DMSO), then diluted in 7H9OPALPen<sup>1</sup>Cyc<sup>10</sup> to obtain a final drug concentration range of 0.032 – 32 µg/mL. A suspension of the test *Mycobacterium* was cultured in 7H9OPALPen<sup>1</sup>Cyc<sup>10</sup> containing 0.05% (v/v) Tween 80 for one week at 37 °C, 5% CO<sub>2</sub>. The bacterial suspension was adjusted to McFarland 0.5 and diluted in 7H9OPALPen<sup>1</sup>Cyc<sup>10</sup> 1:25. 100 µL of the inoculum was added to each well of a 96-well microplate together with 100 µL of the compound titration. The plate was incubated at 37 °C, 5% CO<sub>2</sub>. After 5 days, 10.5 µL 0.05% (w/v) sterile resazurin in 0.02% (v/v) Tween<sup>80</sup> was added. Reduced resazurin was detected using fluorescence (Ex/Em 530/590 nm) in a FLUOstar Optima, BMG Labtech. All titre measurements were plotted in SigmaPlot™ and 4-parameter logistic (4PL) model regressions conducted. The relative MIC<sub>90</sub> of each curve was calculated and averaged, standard errors were reported for all MIC (Table S1). Testing was performed in duplicate with two independent biological repeats. Similarly, REMA assays were performed for the non-mycobacterial organisms but in the optimal media suggested by the EUCAST to determine the MIC<sub>95</sub>. Though, for these cultures, dilutions were performed at 1:200 prior to inoculation of the plate and incubation for 4 hours (Table S4).

**Table S2** – *Mycobacterium* strains used in this study.

| Strains                                                                | Description                                                                                                                                                                         | Source or reference                      |
|------------------------------------------------------------------------|-------------------------------------------------------------------------------------------------------------------------------------------------------------------------------------|------------------------------------------|
| <i>Mtb</i> mc <sup>2</sup> 7902                                        | $\Delta$ leuCD $\Delta$ panCD $\Delta$ argB, Leucine, pantothenate and arginine triple auxotroph                                                                                    | Vilcheze <i>et al.</i> <sup>[25]</sup>   |
| <i>Mtb</i> mc <sup>2</sup> 8245 (INH <sup>R</sup> )                    | mc <sup>2</sup> 7902 derived $\Delta$ 2116169–2162530; $\Delta$ 2116169–2162530 genome deletion, INH <sup>R</sup>                                                                   | Vilcheze <i>et al.</i> <sup>[25]</sup>   |
| <i>Mtb</i> mc <sup>2</sup> 8247 (RIF <sup>R</sup> )                    | mc <sup>2</sup> 7902 derived, <i>rpoB</i> (H445Y); <i>rpoB</i> His445 → Lys, RIF <sup>R</sup>                                                                                       | Vilcheze <i>et al.</i> <sup>[25]</sup>   |
| <i>Mtb</i> mc <sup>2</sup> 8250 (RIF <sup>R</sup> & INH <sup>R</sup> ) | mc <sup>2</sup> 8247 derived, <i>rpoB</i> (H445Y) $\Delta$ 2122397–2170320; <i>rpoB</i> His445 → Lys, RIF <sup>R</sup> , $\Delta$ 2122397–2170320 genome deletion, INH <sup>R</sup> | Vilcheze <i>et al.</i> <sup>[25]</sup>   |
| <i>Mab</i>                                                             | <i>Mycobacterium abscessus</i> NCTC 13031                                                                                                                                           | National Collection of Type Cultures, UK |

**Table S3** – Non-mycobacterial strains used in this study and growth media used.

| Strain                                    | Media used for MIC determination |
|-------------------------------------------|----------------------------------|
| <i>Enterococcus faecalis</i> NCTC 775     | Mueller Hinton broth             |
| <i>Enterococcus faecium</i> NCTC 7171     | Mueller Hinton broth             |
| <i>Staphylococcus aureus</i> NCTC 2981    | Mueller Hinton broth             |
| <i>Klebsiella pneumoniae</i> NCTC 9633    | Mueller Hinton broth             |
| <i>Acinetobacter baumannii</i> NCTC 12156 | Mueller Hinton broth             |
| <i>Pseudomonas aeruginosa</i> DSM 19880   | Mueller Hinton broth             |
| <i>Enterobacter cloacae</i> NCTC 10005    | Mueller Hinton broth             |
| <i>Escherichia coli</i> K12               | Mueller Hinton broth             |

**Table S4** – Non-tuberculosis REMA assay MIC determination.

|                                | <b>Minimum inhibitory concentration 95% (<math>\mu\text{M}</math>)</b> |                |           |                   |            |            |            |
|--------------------------------|------------------------------------------------------------------------|----------------|-----------|-------------------|------------|------------|------------|
|                                | <i>anti-1aw</i>                                                        | <i>syn-1aw</i> | <b>S4</b> | <b>RIF</b>        | <b>INH</b> | <b>ETH</b> | <b>EMB</b> |
| <i>E. faecalis</i> NCTC 775    | >32                                                                    | >32            | >32       | >12.8             | >32        | >32        | >32        |
| <i>E. faecium</i> NCTC 7171    | >32                                                                    | >32            | >32       | 1.733 $\pm$ 0.017 | >32        | >32        | >32        |
| <i>S. aureus</i> NCTC 2981     | >32                                                                    | >32            | >32       | <0.0125           | >32        | >32        | >32        |
| <i>K. pneumoniae</i> NCTC 9633 | >32                                                                    | >32            | >32       | >12.8             | >32        | >32        | >32        |
| <i>A. baumannii</i> NCTC 12156 | >32                                                                    | >32            | >32       | 1.363 $\pm$ 0.012 | >32        | >32        | >32        |
| <i>P. aeruginosa</i> DSM 19880 | >32                                                                    | >32            | >32       | >12.8             | >32        | >32        | >32        |
| <i>E. cloacae</i> NCTC 10005   | >32                                                                    | >32            | >32       | >12.8             | >32        | >32        | >32        |
| <i>E. coli</i> K12             | >32                                                                    | >32            | >32       | 3.034 $\pm$ 0.001 | >32        | >32        | >32        |



## 7. References

- [1] *Purification of Laboratory Chemicals*, 3rd edition. D. D. Perrin, W. L. F. Armarego, *Pergamon Press*, Oxford, **1988**.
- [2] S. Sharma, R. A. Maurya, K.-I. Min, G.-Y. Jeong, D.-P. Kim, *Angew. Chem. Int. Ed.*, **2013**, *52*, 7564.
- [3] R. C. Clark, J. S. Reid, *Acta Cryst.*, **1995**, *A51*, 887.
- [4] CrysAlisPro, Rigaku Oxford Diffraction, Tokyo, Japan.
- [5] G. M. Sheldrick, *Acta Crystallogr., Sect. A: Found. Crystallogr.* **2015**, *71*, 3.
- [6] G. M. Sheldrick, *Acta Crystallogr., Sect. A: Found. Crystallogr.* **2008**, *64*, 112.
- [7] O. V. Dolomanov, L. J. Bourhis, R. J. Gildea, J. A. K Howard, H. Puschmann, *J. Appl. Cryst.* **2009**, *42*, 339.
- [8] MacroModel, version 13.6, Schrödinger, LLC, New York, NY, 2022.
- [9] T. A. Halgren, *J. Comput. Chem.*, **1996**, *17*, 490.
- [10] T. A. Halgren, *J. Comput. Chem.*, **1996**, *17*, 520.
- [11] T. A. Halgren, *J. Comput. Chem.*, **1996**, *17*, 553.
- [12] T. A. Halgren, R. B. Nachbar, *J. Comput. Chem.*, **1996**, *17*, 587.
- [13] T. A. Halgren, *J. Comput. Chem.*, **1996**, *17*, 616.
- [14] T. A. Halgren, *J. Comput. Chem.*, **1999**, *20*, 720.
- [15] I. Kolossváry, W. C. Guida, *J. Comput. Chem.*, **1999**, *20*, 1671.
- [16] I. Kolossváry, W. C. Guida, *J. Am. Chem. Soc.*, **1996**, *118*, 5011.
- [17] F. Neese, F. Wennmohs, U. Becker, C. Riplinger, *J. Chem. Phys.* **2020**, *152*, 224108.
- [18] C. Adamo, V. Barone, *J. Chem. Phys.*, **1999**, *110*, 6158.
- [19] S. Grimme, J. Antony, S. Ehrlich, H. Krieg, *J. Chem. Phys.*, **2010**, *132*, 154104.
- [20] F. Weigend, R. Ahlrichs, *Phys. Chem. Chem. Phys.* **2005**, *7*, 3297.
- [21] F. Weigend, *Phys. Chem. Chem. Phys.* **2006**, *8*, 1057.
- [22] A. V. Marenich, C. J. Cramer, D. G. Truhlar, *J. Phys. Chem. B* **2009**, *113*, 6378.
- [23] N. Mardirossian, M. Head-Gordon, *J. Chem. Phys.* **2016**, *144*, 214110.
- [24] V. B. Makane, V. S. Krishna, E. V. Krishna, M. Shukla, B. Mahizhaveni, S. Misra, S. Chopra, D. Sriram, V. N. A. Dusthacker, H. B. Rode, *Eur. J. Med. Chem.* **2019**, *164*, 665.
- [25] C. Vilchèze, J. Copeland, T. L. Keiser, T. Weisbrod, J. Washington, P. Jain, A. Malek, B. Weinrick, W. R. Jacobs, *mBio* **2018**, *9*, 10.1128/mbio.00938-18.
- [26] J.-C. Palomino, A. Martin, M. Camacho, H. Guerra, J. Swings, F. Portaels, *Antimicrob. Agents Chemother.* **2002**, *46*, 2720.

## 8. NMR Spectra

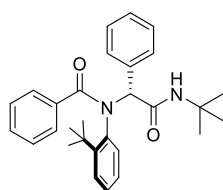

**anti-1a**  
 $^1\text{H NMR}$ ,  $\text{CDCl}_3$   
300 MHz, 298 K

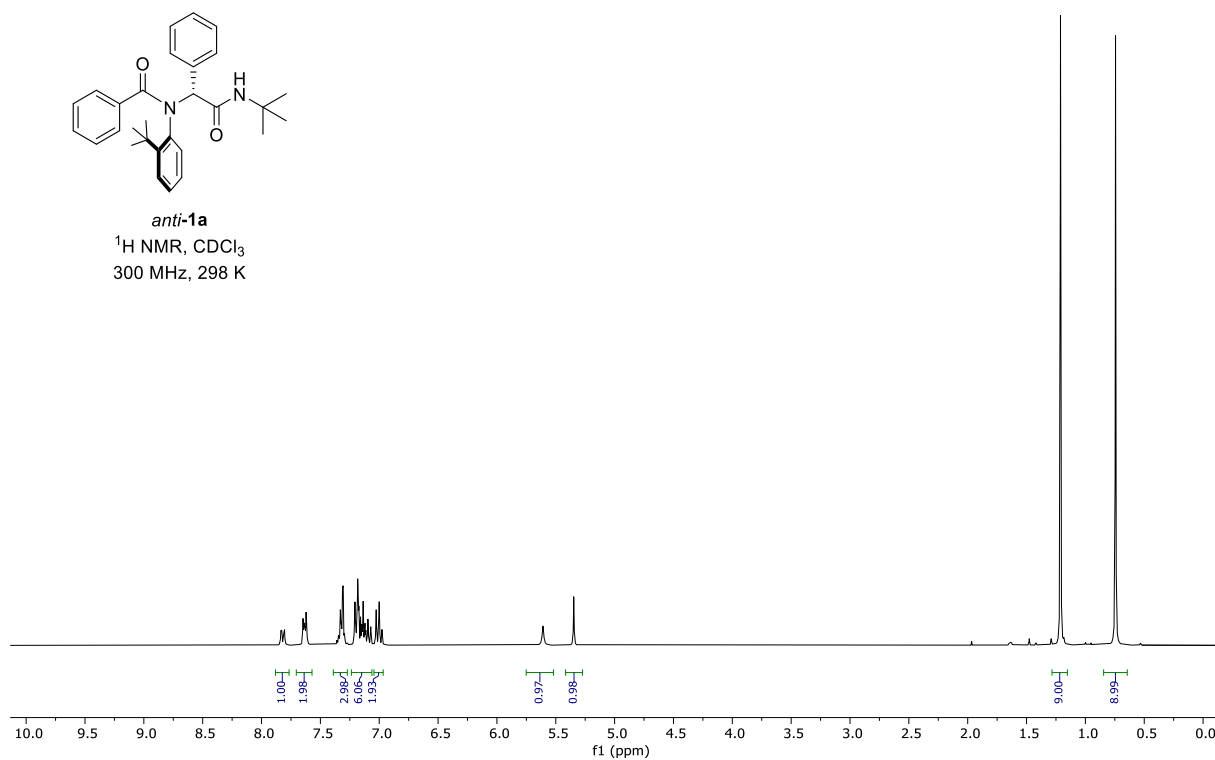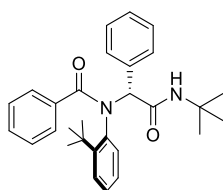

**anti-1a**  
 $^{13}\text{C NMR}$ ,  $\text{CDCl}_3$   
75 MHz, 298 K

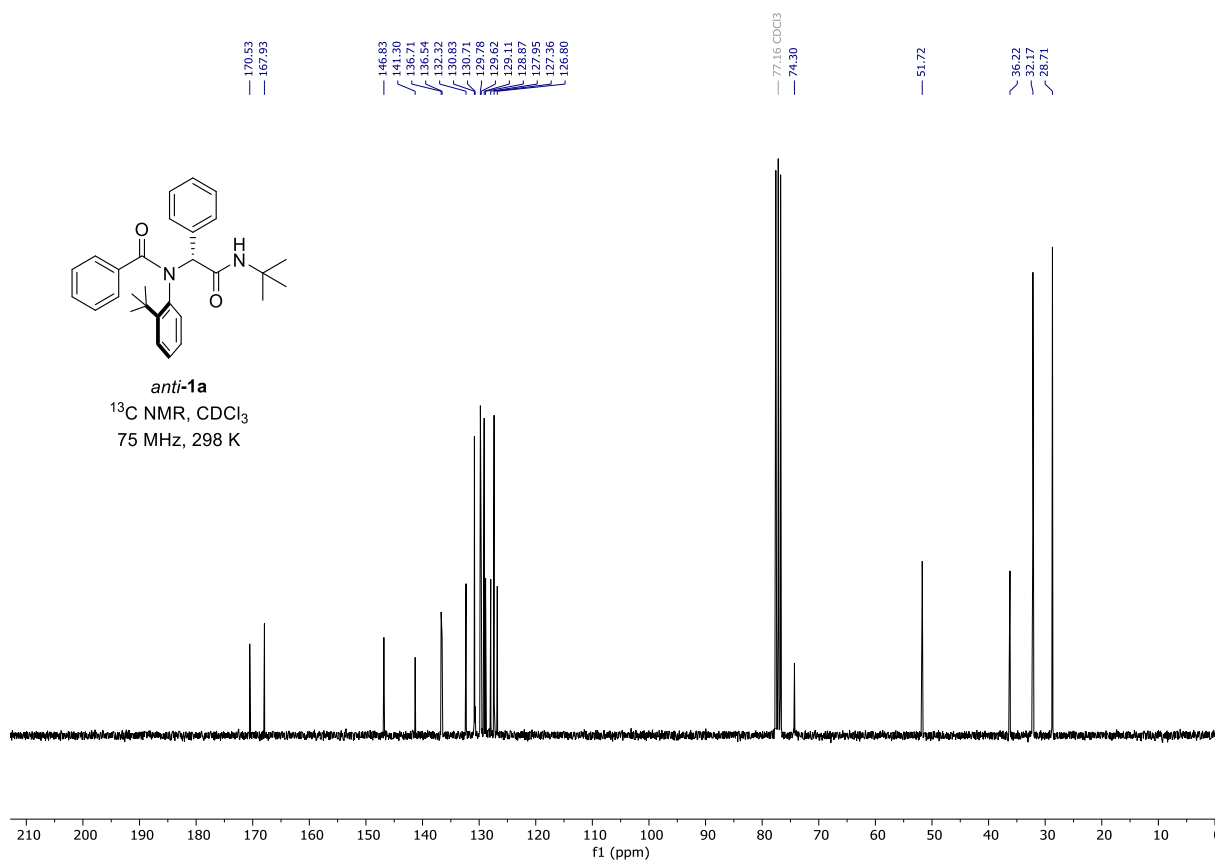

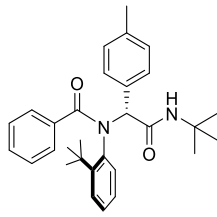

**anti-1b**  
<sup>1</sup>H NMR, CDCl<sub>3</sub>  
 300 MHz, 298 K

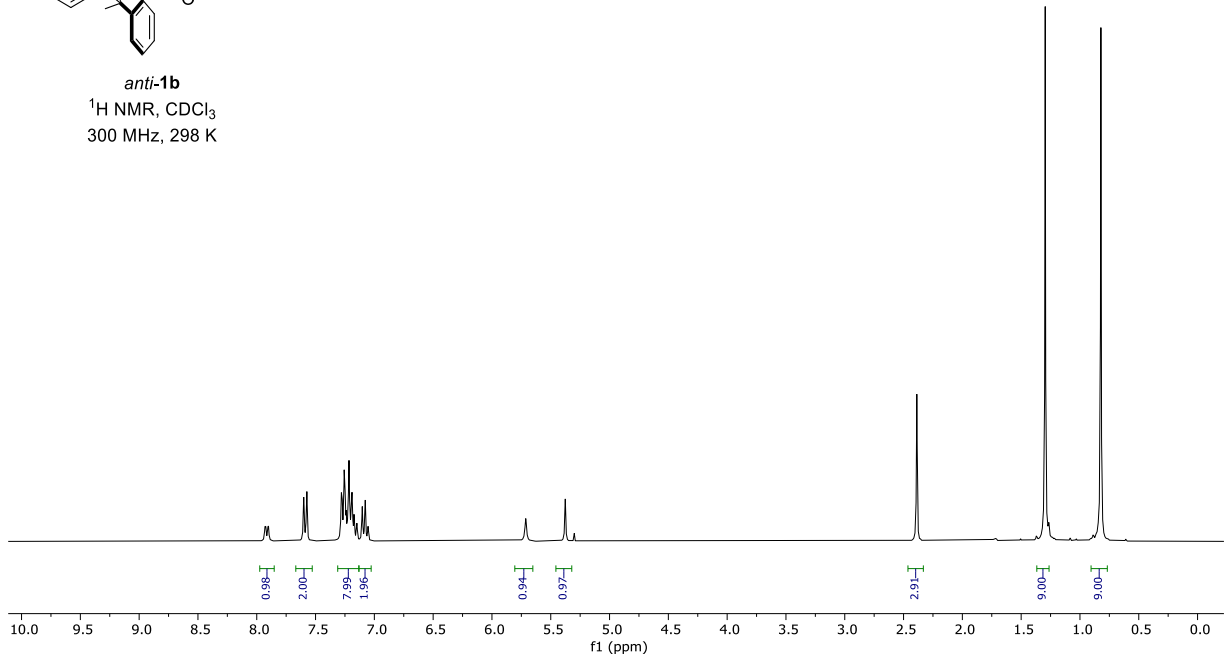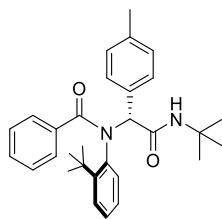

**anti-1b**  
<sup>13</sup>C NMR, CDCl<sub>3</sub>  
 75 MHz, 298 K

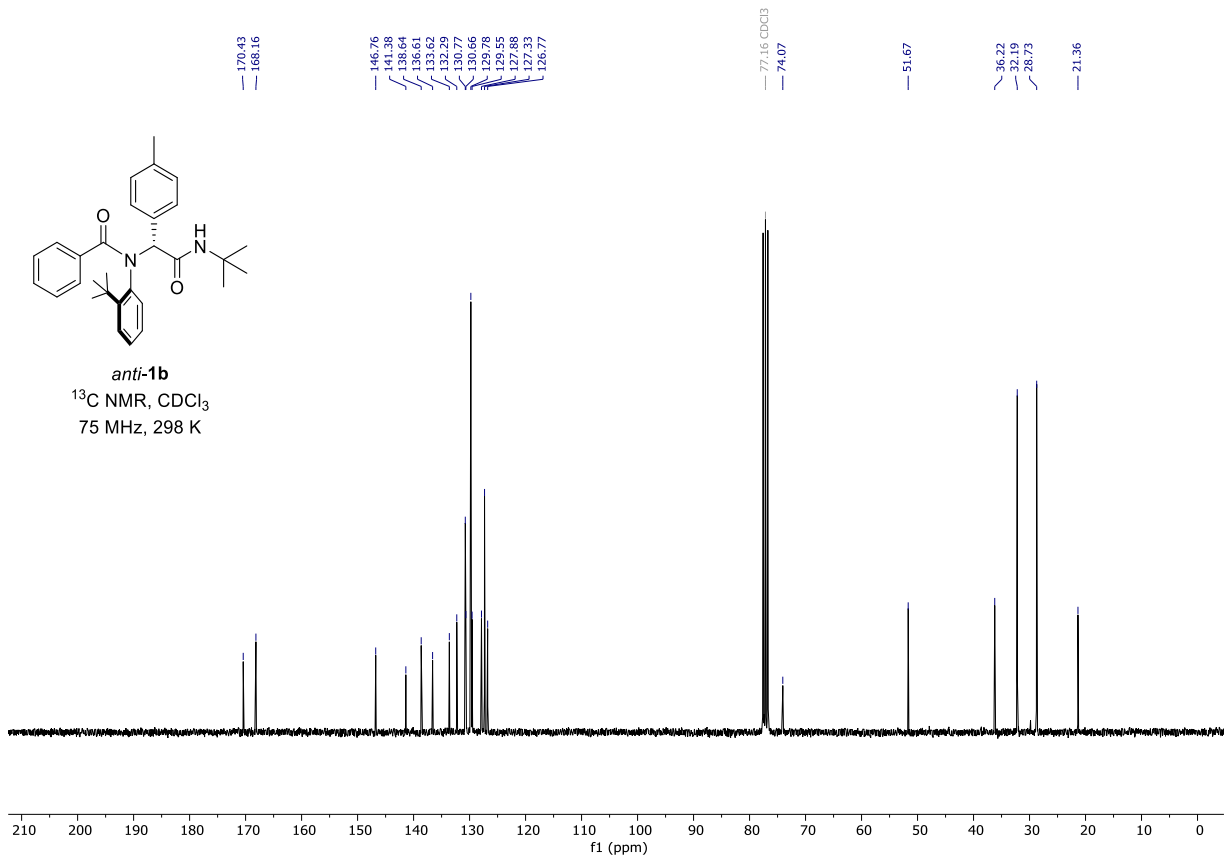

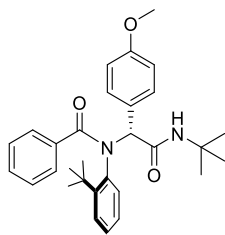

**anti-1c**  
<sup>1</sup>H NMR, CDCl<sub>3</sub>  
 300 MHz, 298 K

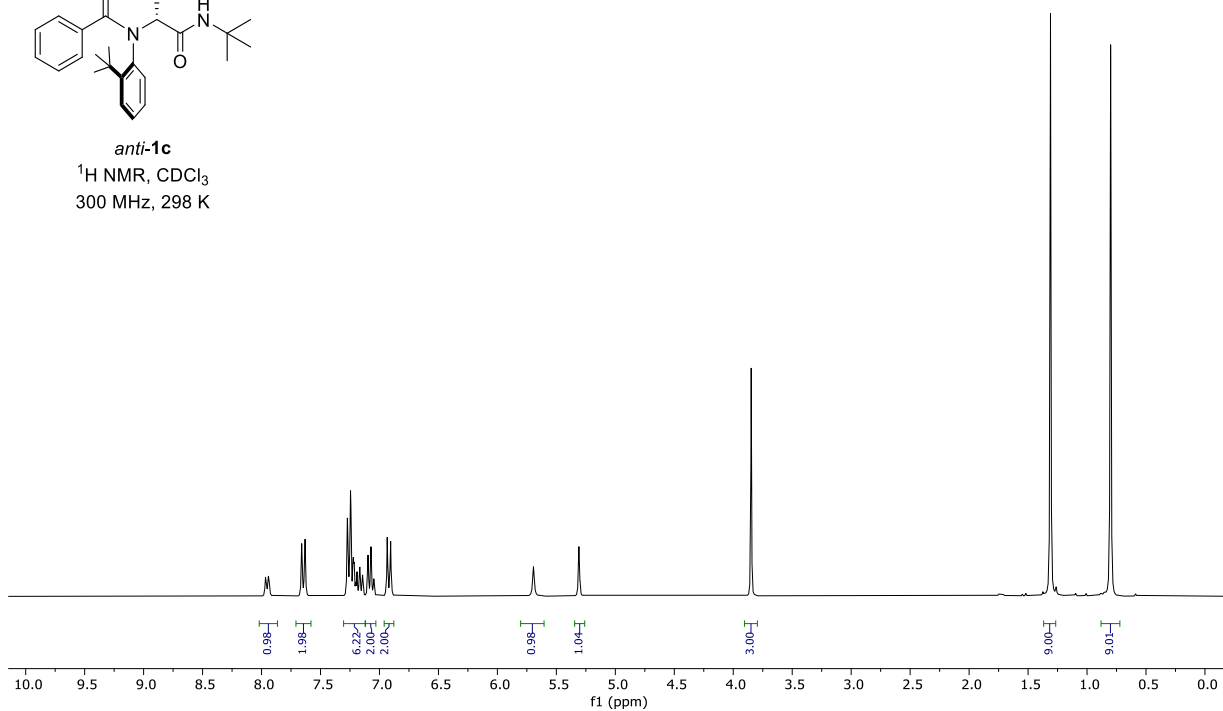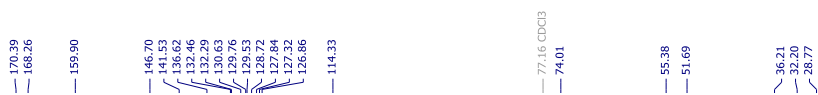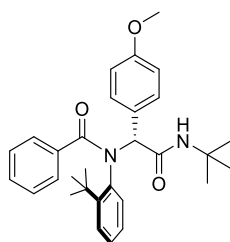

**anti-1c**  
<sup>13</sup>C NMR, CDCl<sub>3</sub>  
 75 MHz, 298 K

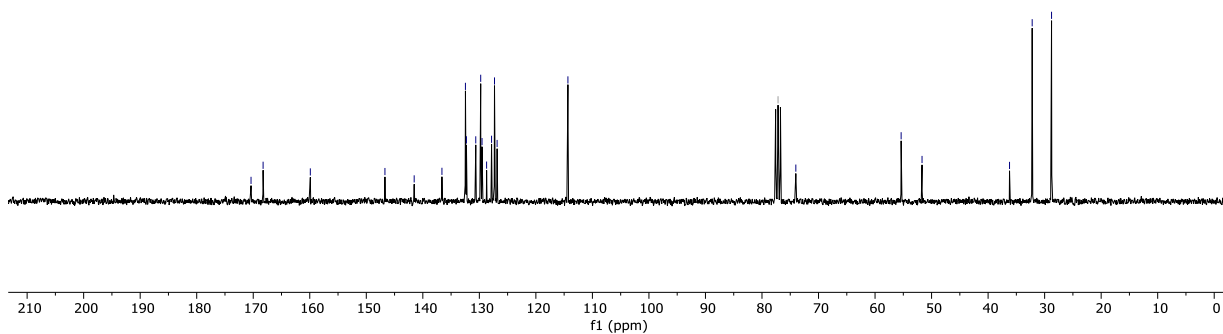

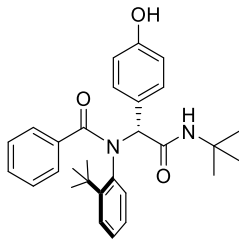

**anti-1d**

$^1\text{H}$  NMR,  $\text{CDCl}_3$   
300 MHz, 298 K

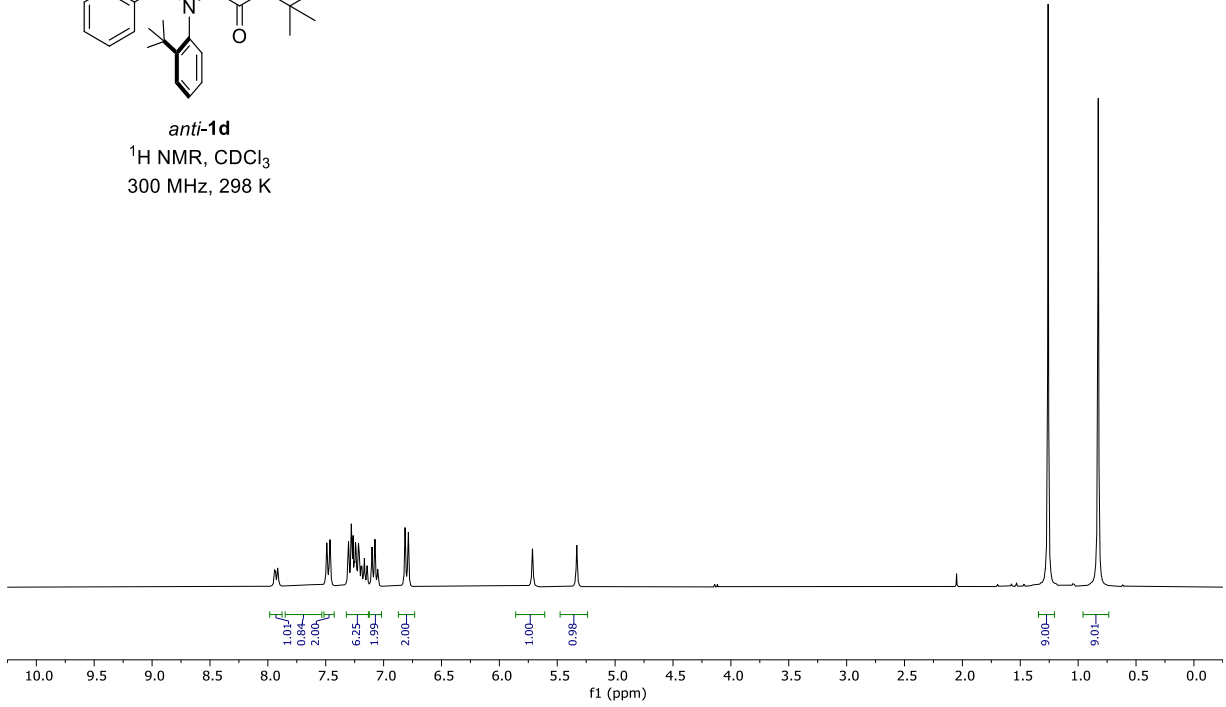

170.90  
168.28  
157.18  
146.88  
141.02  
136.20  
132.11  
132.07  
130.86  
129.84  
129.81  
128.02  
127.47  
126.82  
116.35  
77.16  $\text{CDCl}_3$   
74.36  
51.76  
35.20  
35.10  
28.69

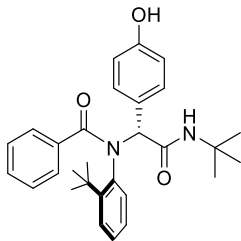

**anti-1d**

$^{13}\text{C}$  NMR,  $\text{CDCl}_3$   
75 MHz, 298 K

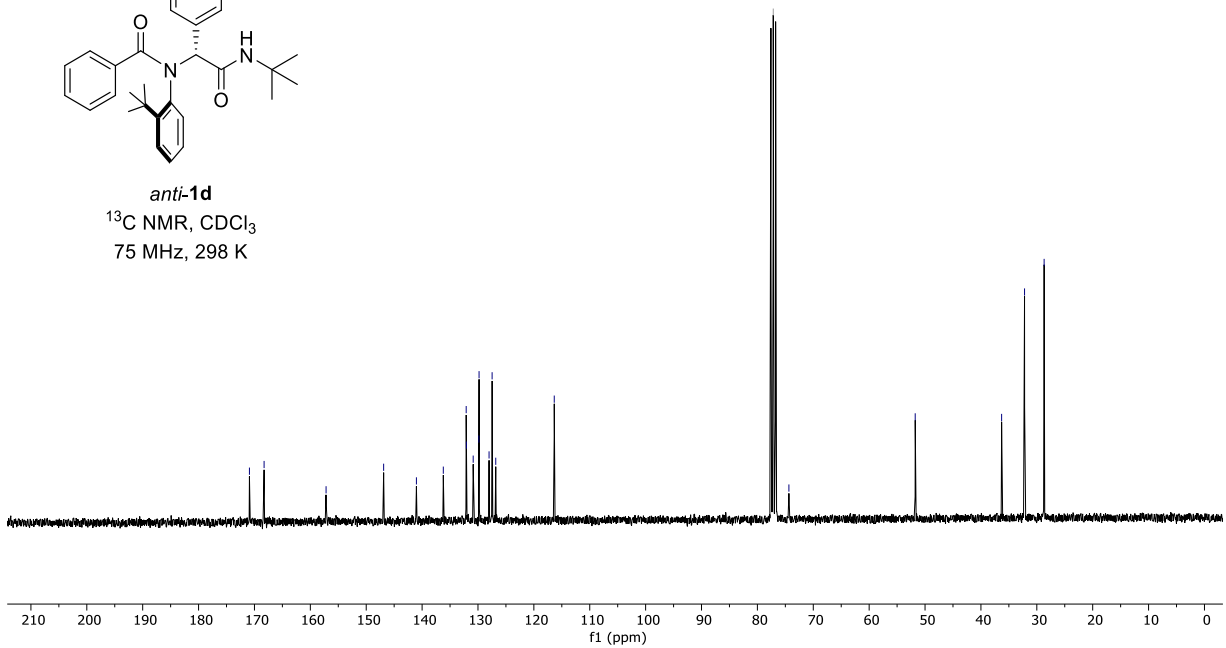

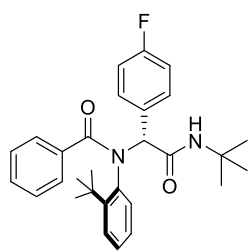

**anti-1e**  
<sup>1</sup>H NMR, CDCl<sub>3</sub>  
 300 MHz, 298 K

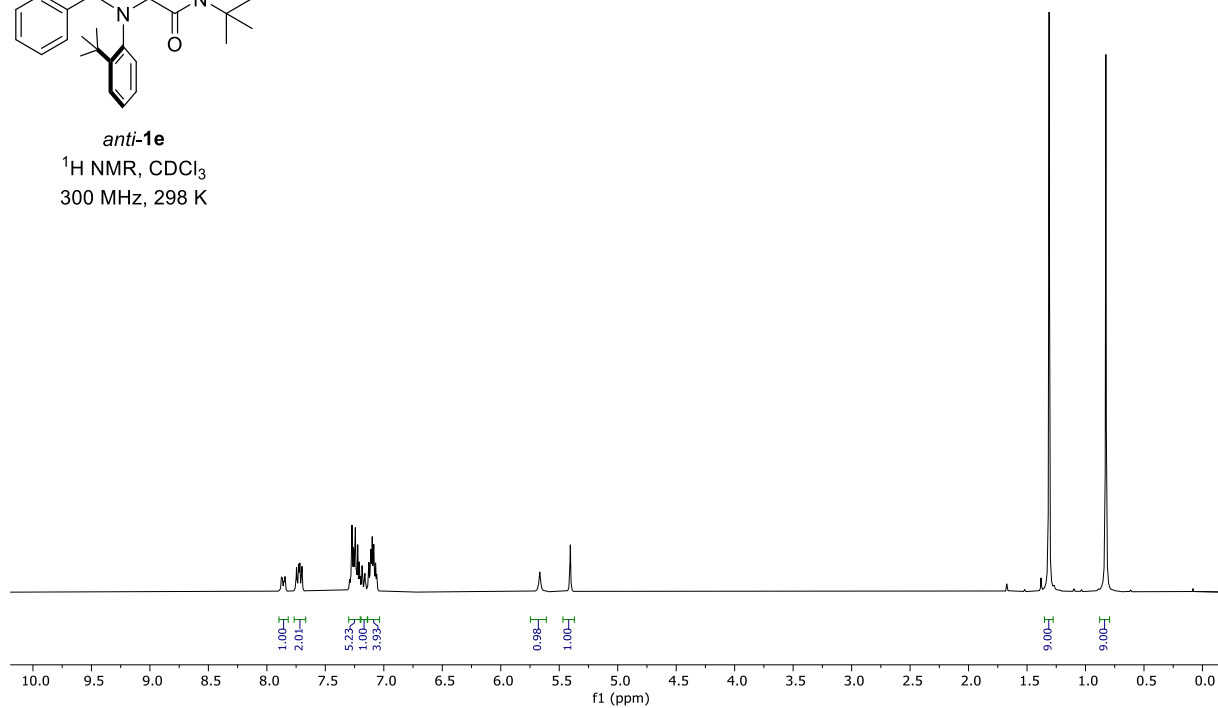

170.65  
 167.72  
 164.63  
 161.33  
 146.75  
 141.15  
 136.38  
 132.76  
 132.66  
 132.66  
 132.61  
 132.25  
 130.76  
 129.76  
 129.73  
 128.76  
 127.41  
 126.89  
 116.17  
 115.88  
 77.16 CDCl<sub>3</sub>  
 73.44  
 51.84  
 36.24  
 38.75

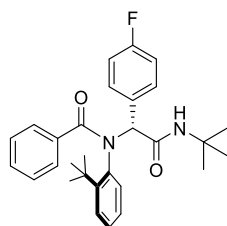

**anti-1e**  
<sup>13</sup>C NMR, CDCl<sub>3</sub>  
 75 MHz, 298 K

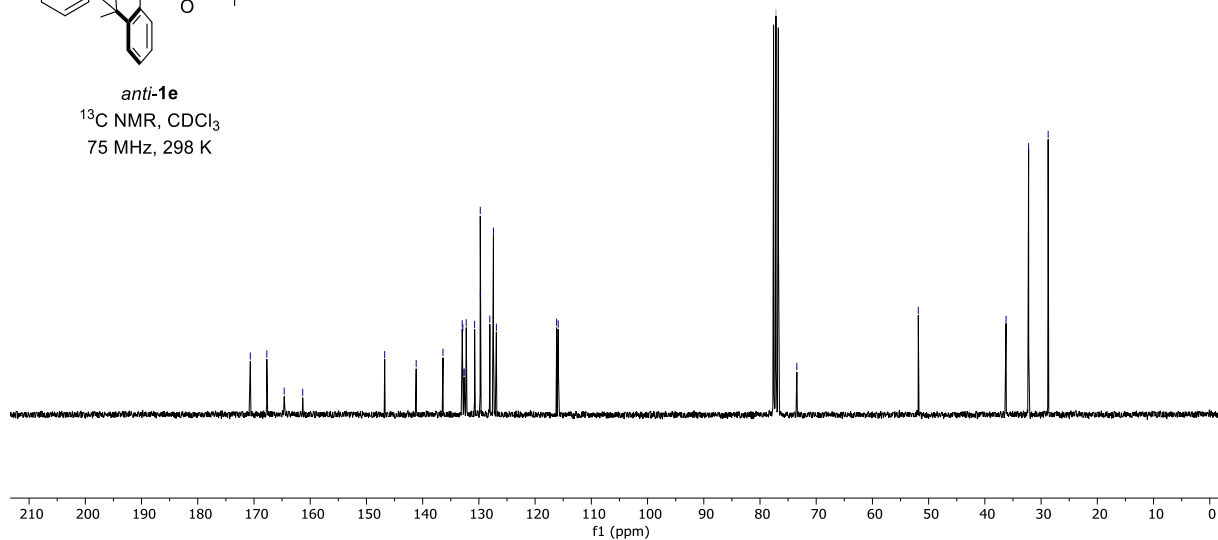

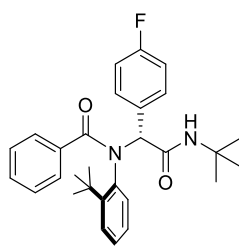

*anti-1e*

$^{19}\text{F}$  NMR,  $\text{CDCl}_3$   
282 MHz, 298 K

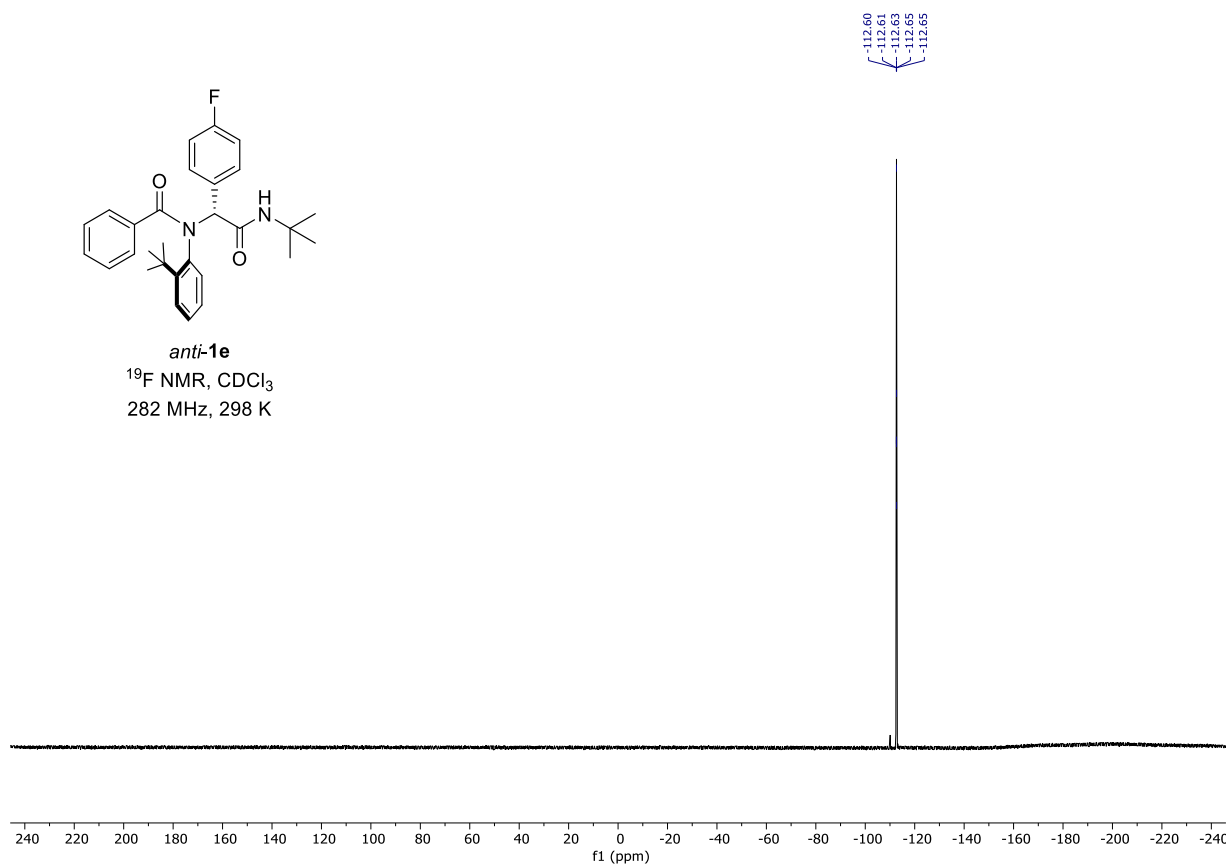

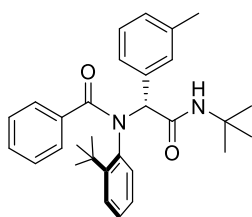

**anti-1f**  
<sup>1</sup>H NMR, CDCl<sub>3</sub>  
 300 MHz, 298 K

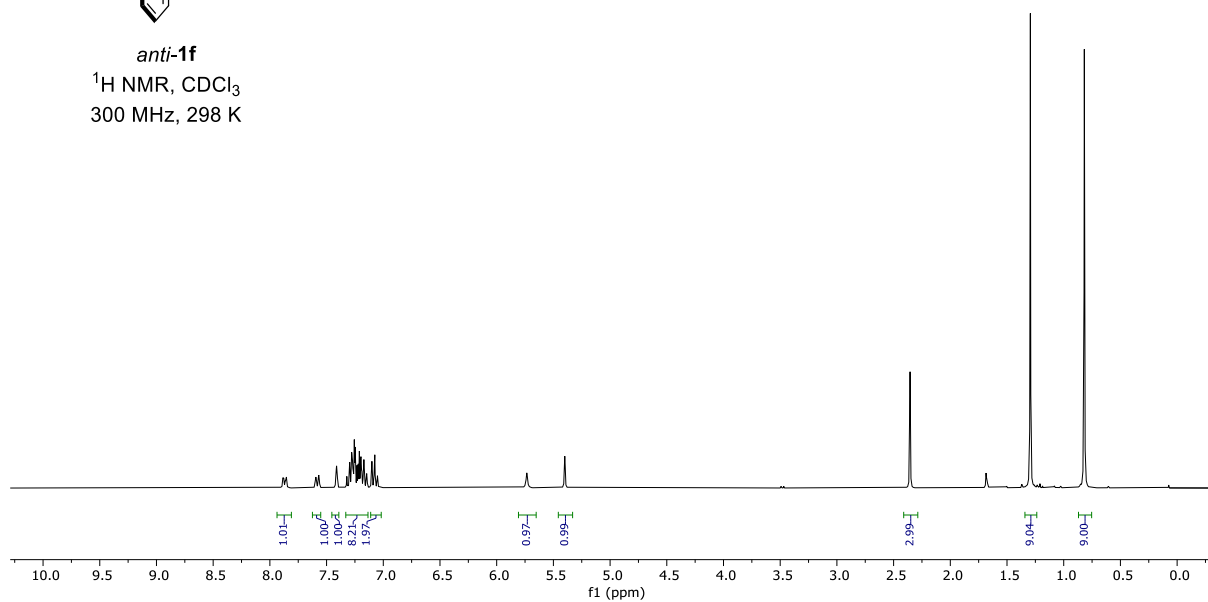

170.41  
 167.99  
 146.85  
 143.52  
 138.52  
 136.59  
 132.31  
 131.48  
 130.72  
 129.79  
 129.99  
 129.63  
 129.03  
 127.91  
 127.78  
 127.35  
 126.75  
 77.16, CDCl<sub>3</sub>  
 74.08  
 51.70  
 36.25  
 32.15  
 28.73  
 21.60

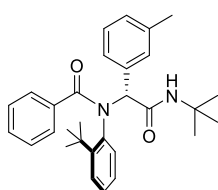

**anti-1f**  
<sup>13</sup>C NMR, CDCl<sub>3</sub>  
 75 MHz, 298 K

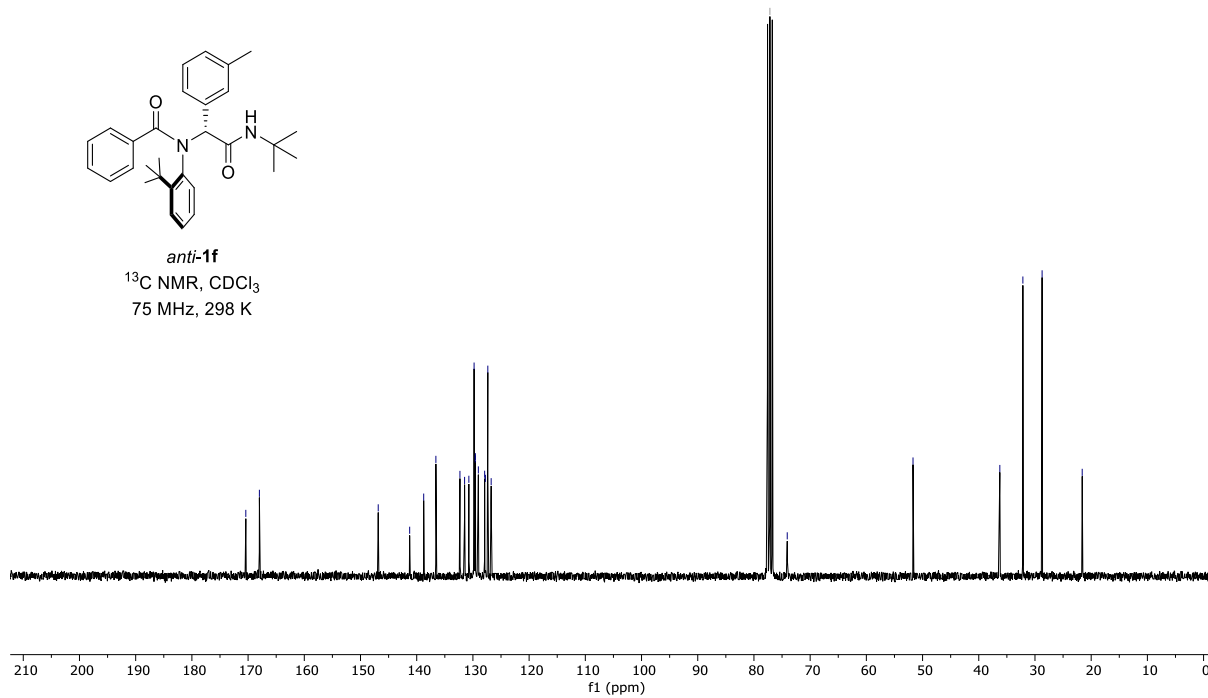



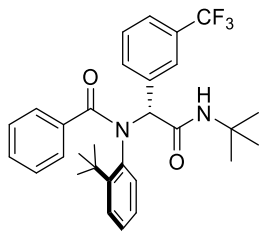

**anti-1g**

<sup>1</sup>H NMR, CDCl<sub>3</sub>  
300 MHz, 298 K

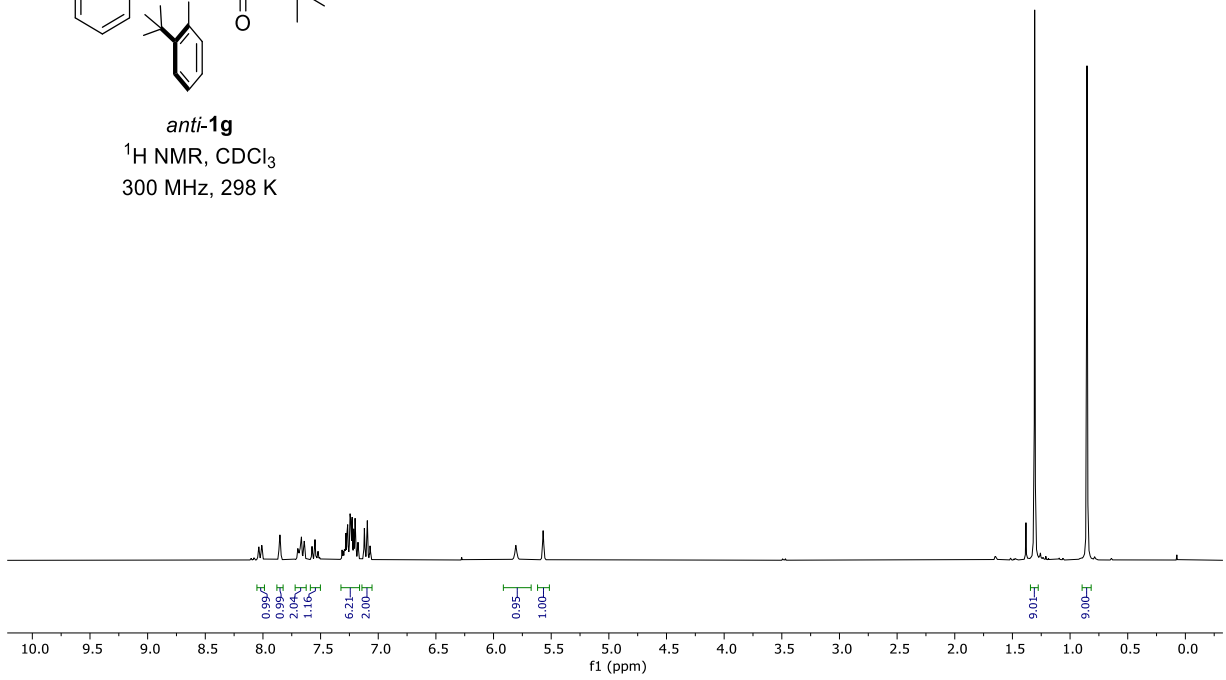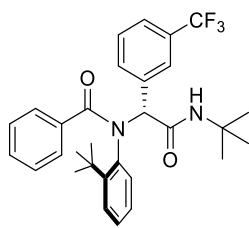

**anti-1g**

<sup>13</sup>C NMR, CDCl<sub>3</sub>  
101 MHz, 298 K

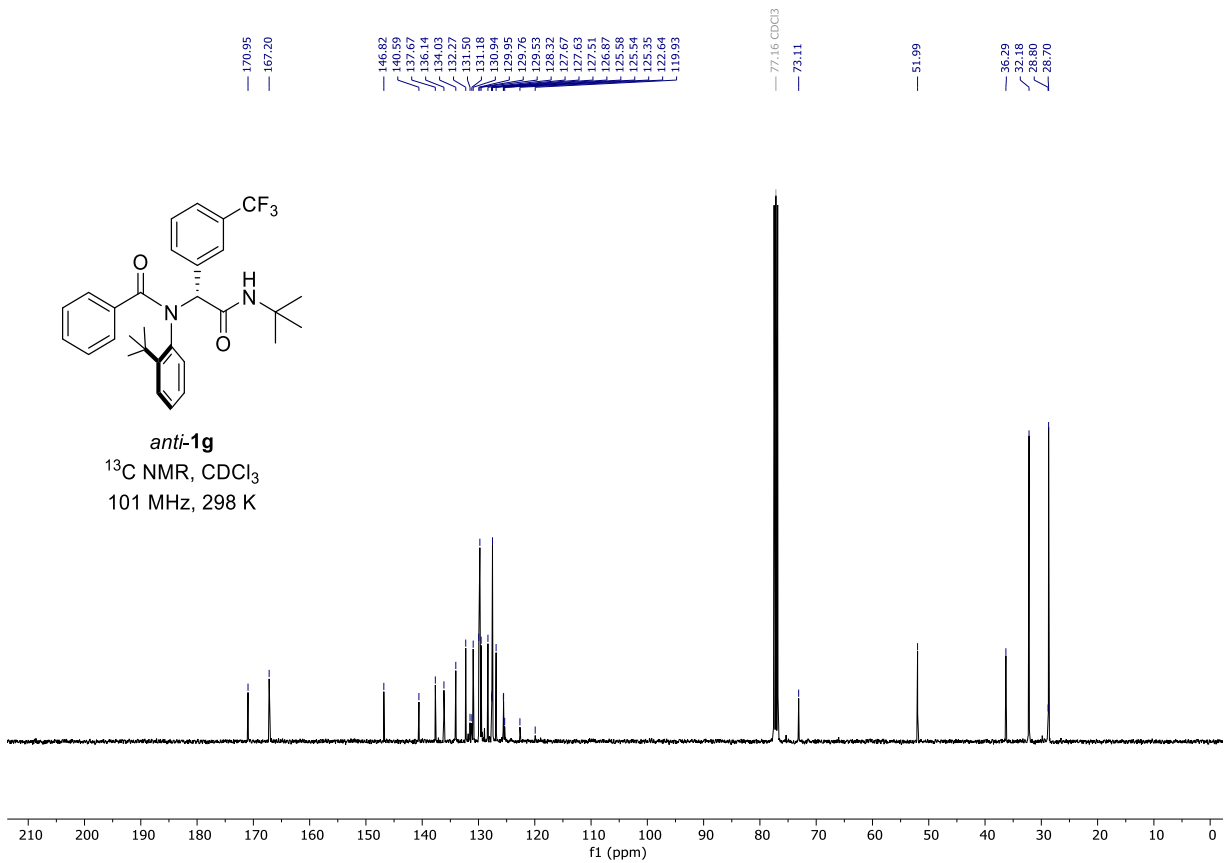

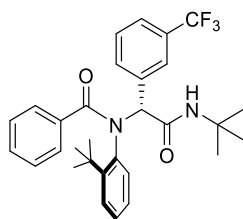

*anti-1g*

$^{19}\text{F}$  NMR,  $\text{CDCl}_3$

282 MHz, 298 K

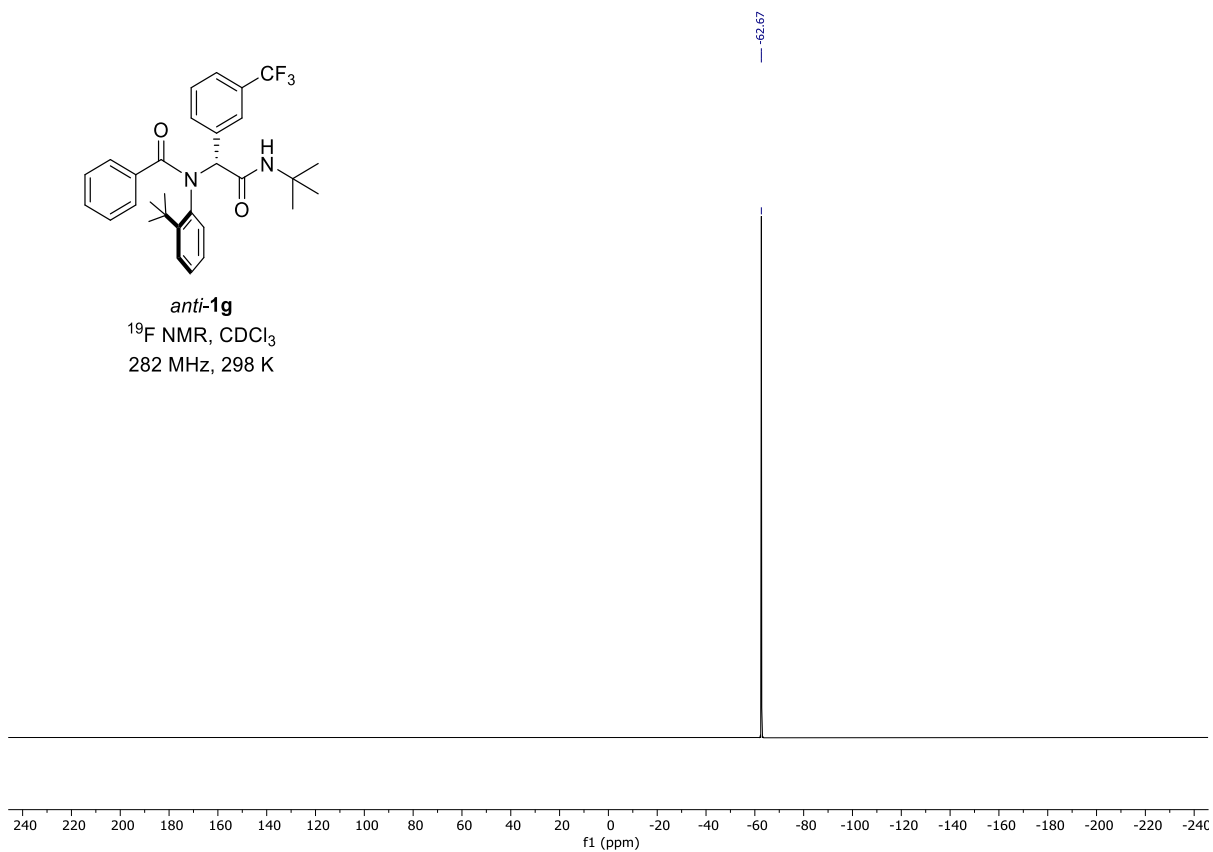

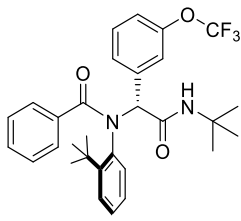

**anti-1h**  
<sup>1</sup>H NMR, CDCl<sub>3</sub>  
 300 MHz, 298 K

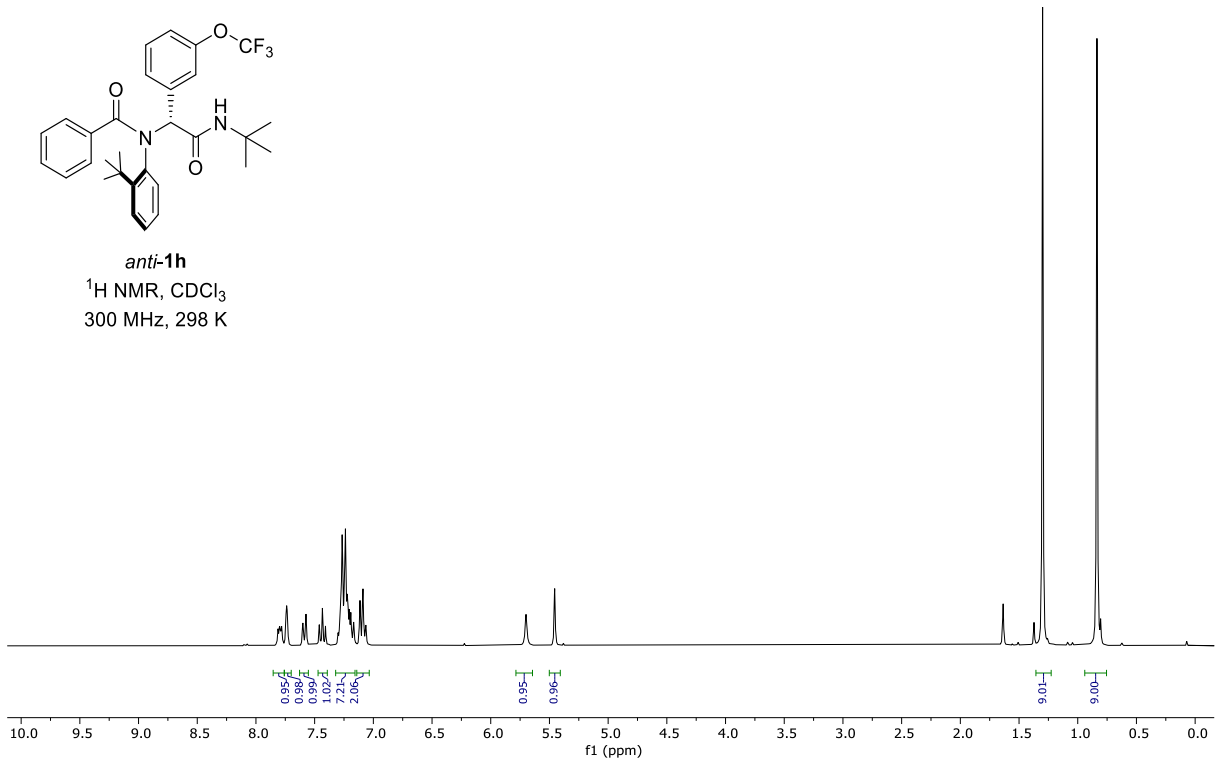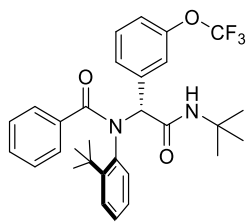

**anti-1h**  
<sup>13</sup>C NMR, CDCl<sub>3</sub>  
 75 MHz, 298 K

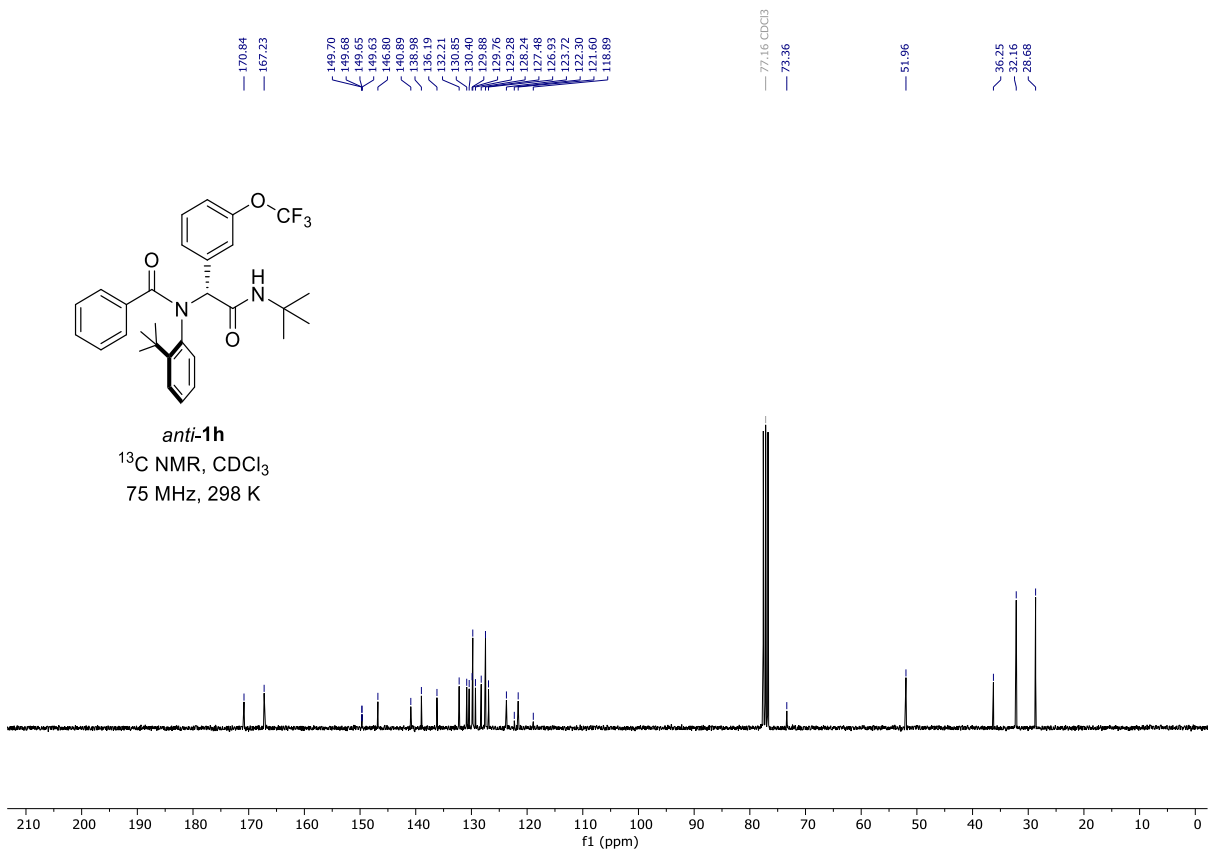

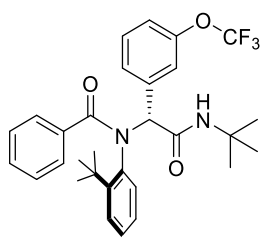

*anti-1h*

$^{19}\text{F}$  NMR,  $\text{CDCl}_3$   
282 MHz, 298 K

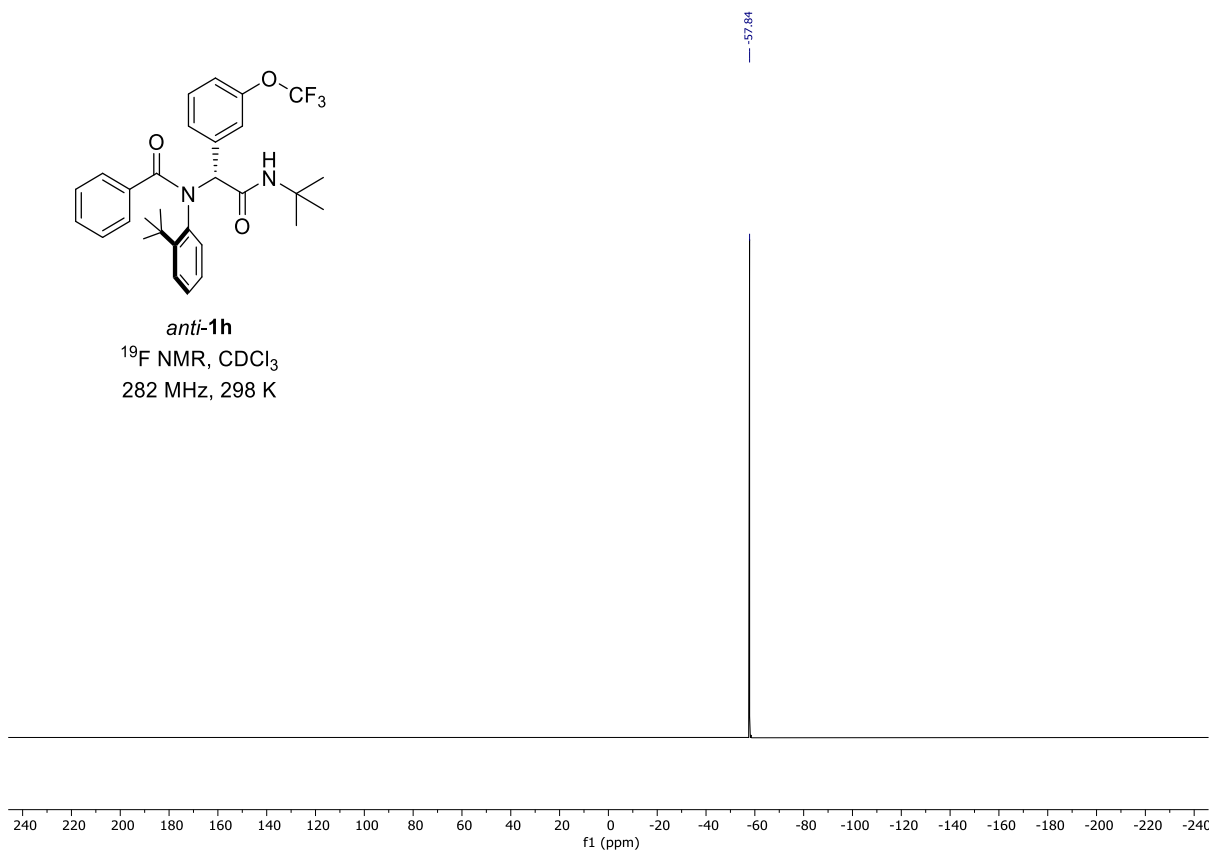

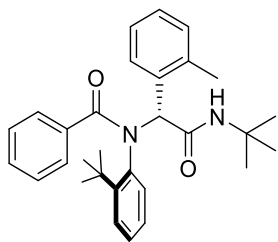

**anti-1i**

<sup>1</sup>H NMR, CDCl<sub>3</sub>  
300 MHz, 298 K

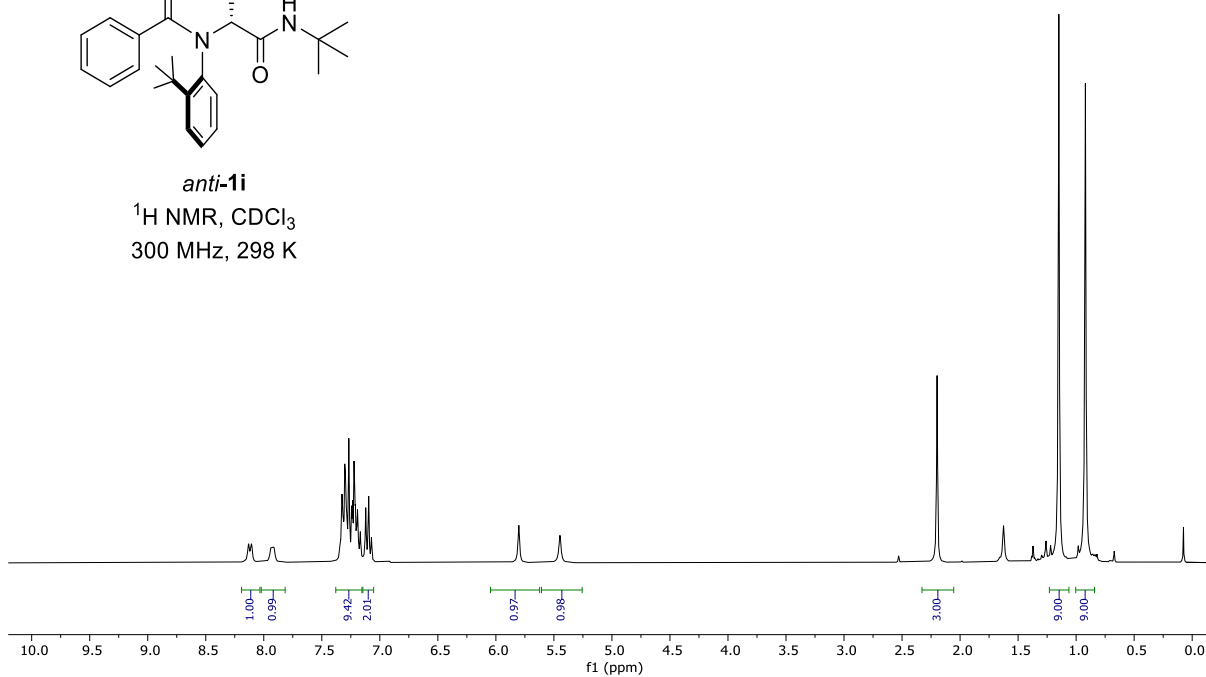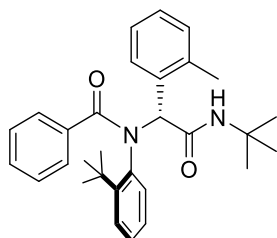

**anti-1i**

<sup>13</sup>C NMR, CDCl<sub>3</sub>  
75 MHz, 298 K

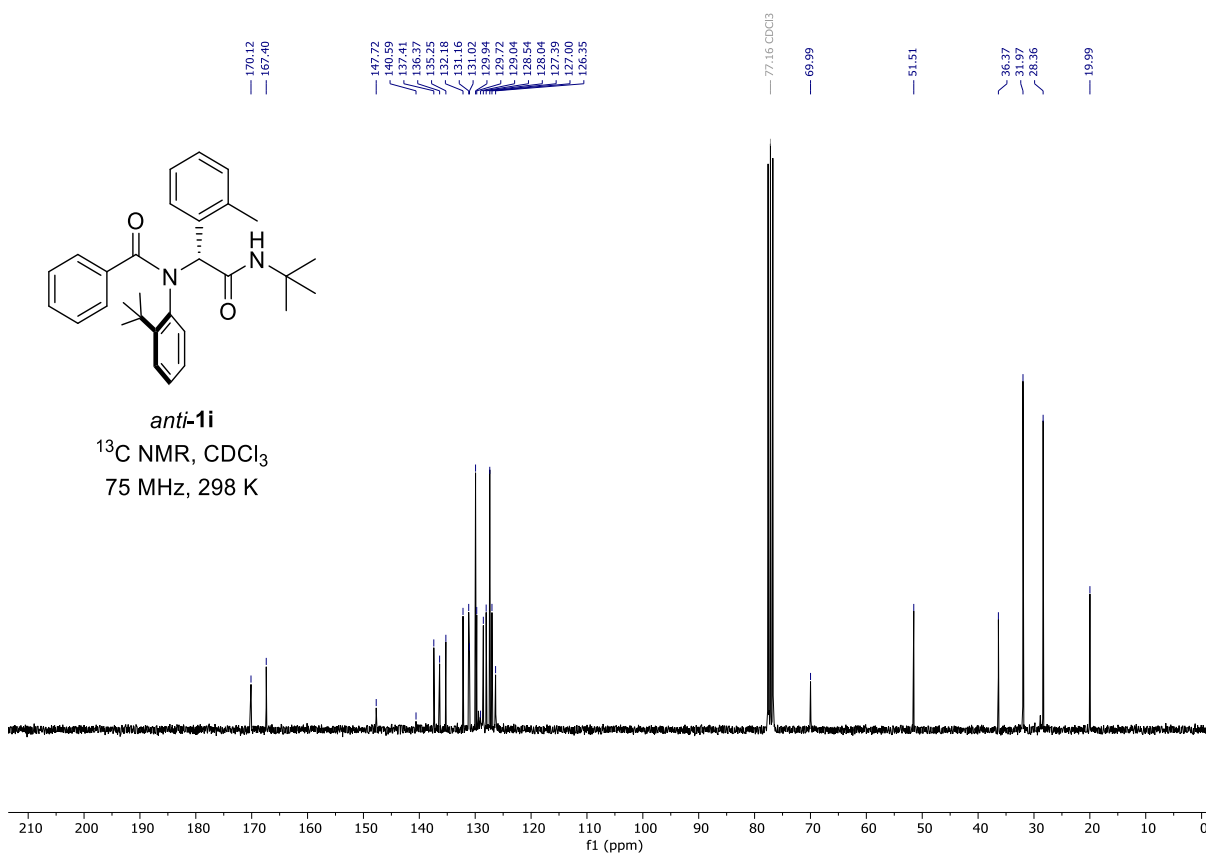

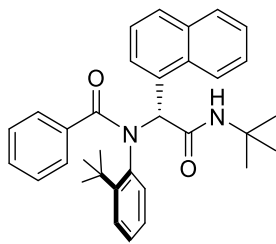

**anti-1j**

<sup>1</sup>H NMR, CDCl<sub>3</sub>  
300 MHz, 298 K

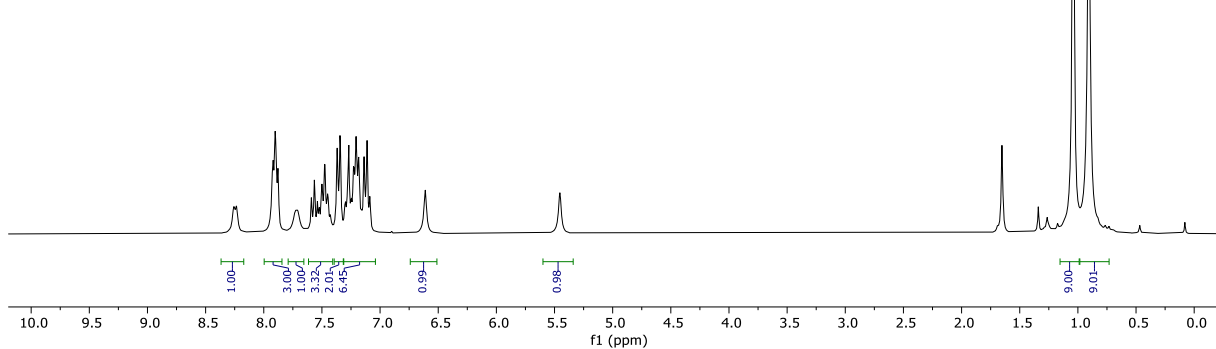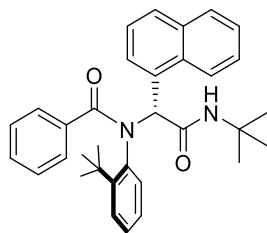

**anti-1j**

<sup>13</sup>C NMR, CDCl<sub>3</sub>  
75 MHz, 298 K

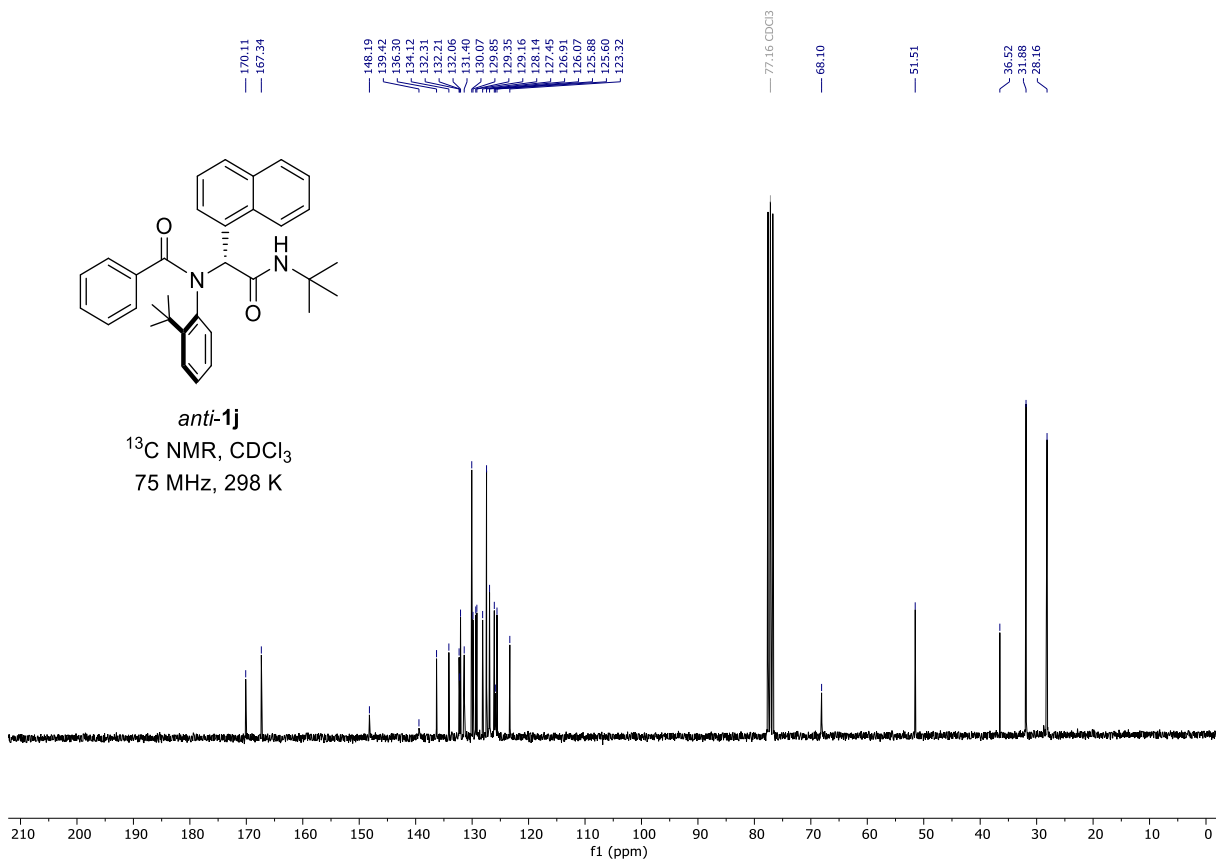

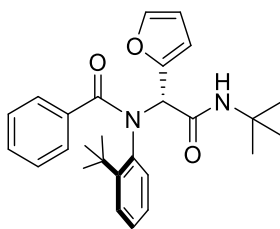

**anti-1k**  
 $^1\text{H}$  NMR,  $\text{CDCl}_3$   
 300 MHz, 298 K

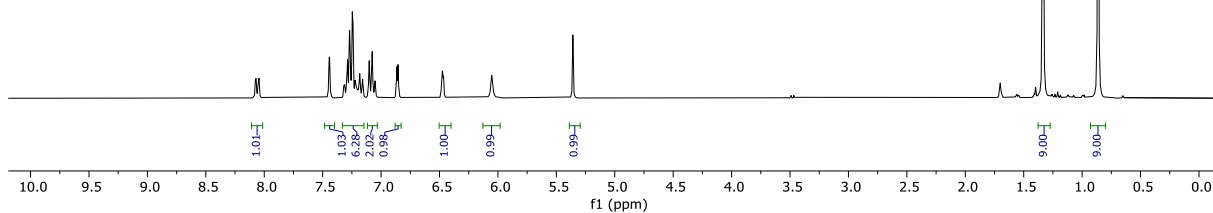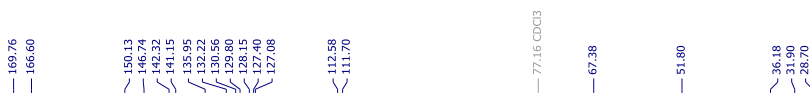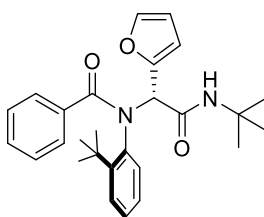

**anti-1k**  
 $^{13}\text{C}$  NMR,  $\text{CDCl}_3$   
 75 MHz, 298 K

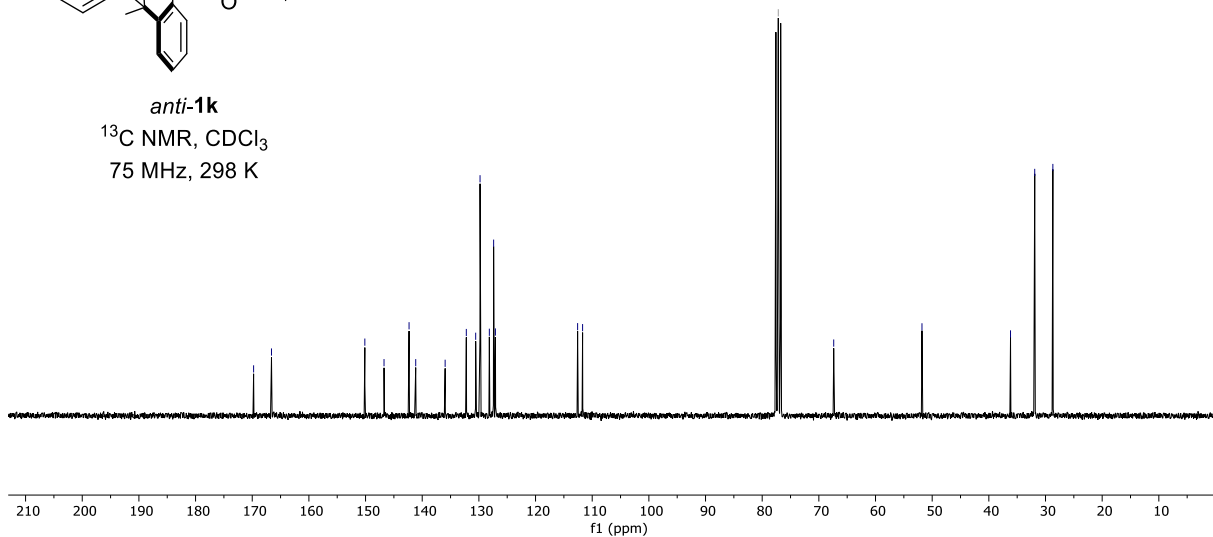

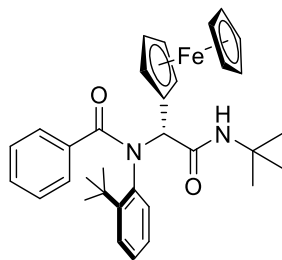

*anti-11*  
<sup>1</sup>H NMR, CDCl<sub>3</sub>  
 300 MHz, 298 K

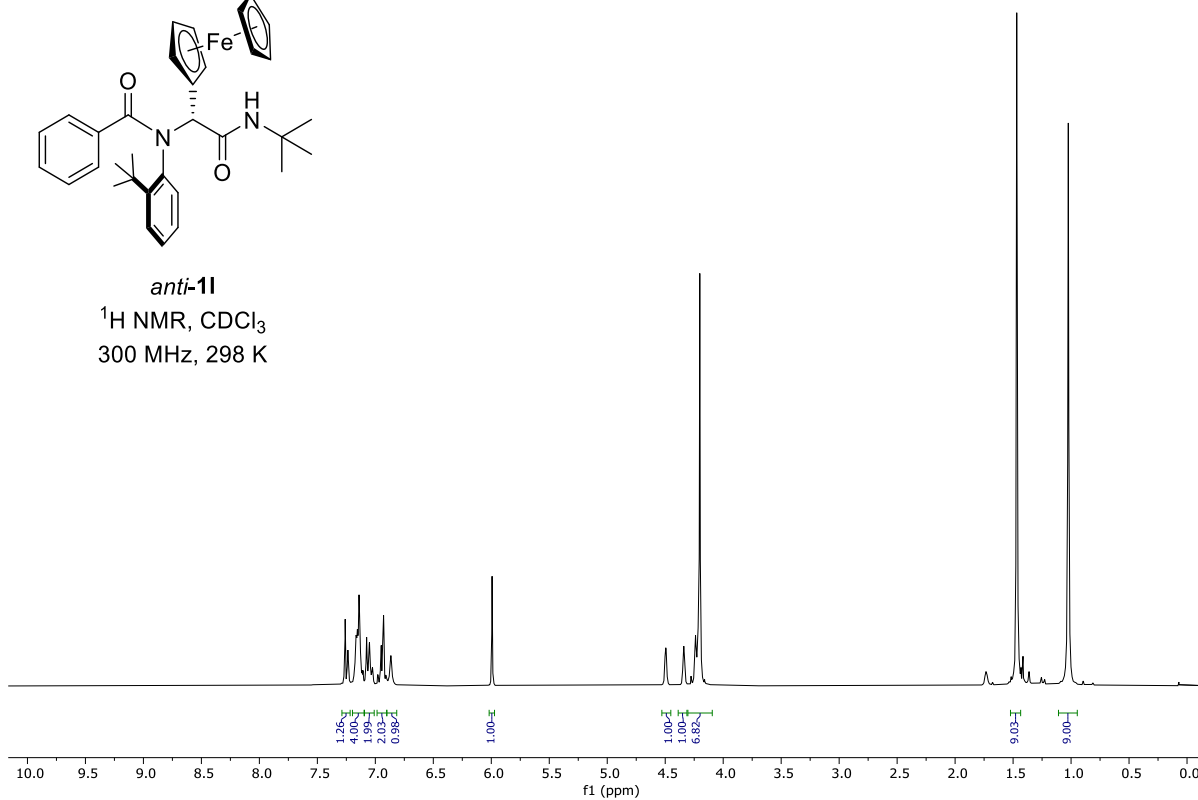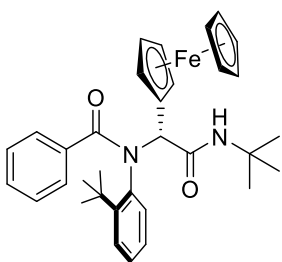

*anti-11*  
<sup>13</sup>C NMR, CDCl<sub>3</sub>  
 75 MHz, 298 K

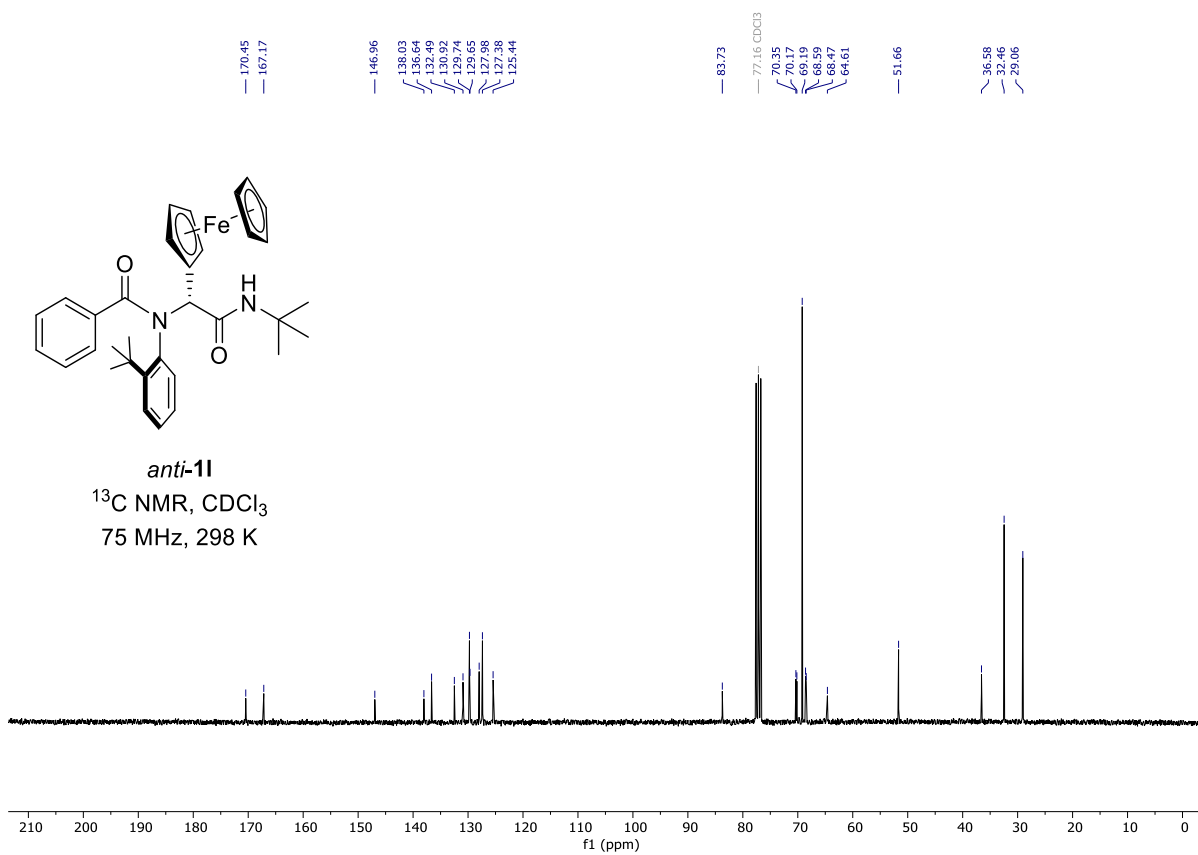



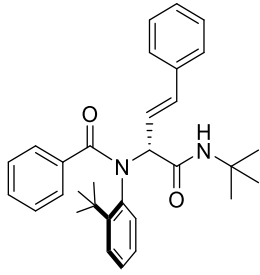

*anti-1m*

$^1\text{H NMR}$ ,  $\text{CDCl}_3$   
300 MHz, 298 K

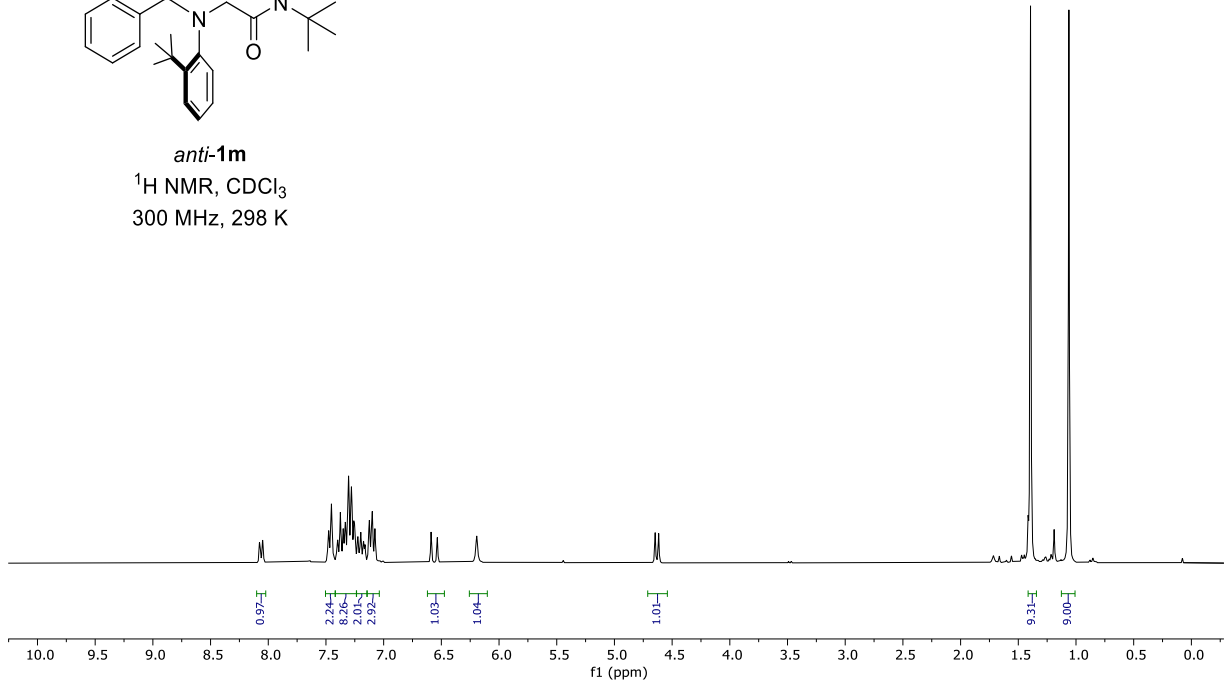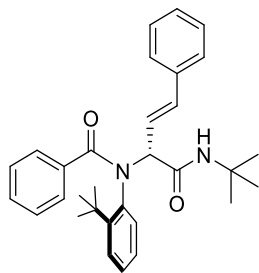

*anti-1m*

$^{13}\text{C NMR}$ ,  $\text{CDCl}_3$   
75 MHz, 298 K

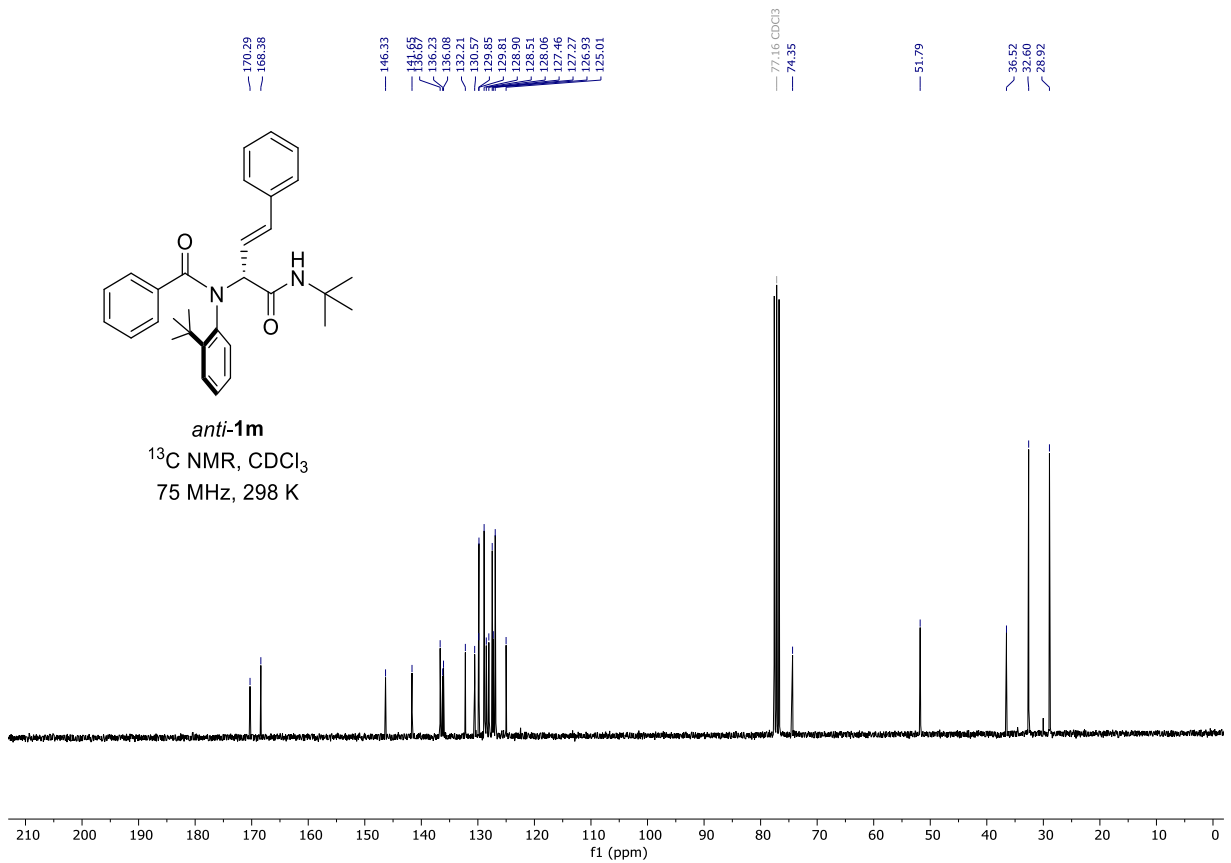

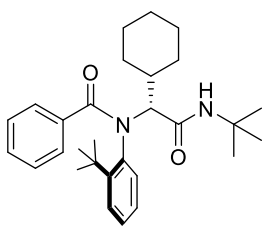

**anti-1n**  
 $^1\text{H NMR}$ ,  $\text{CDCl}_3$   
 300 MHz, 298 K

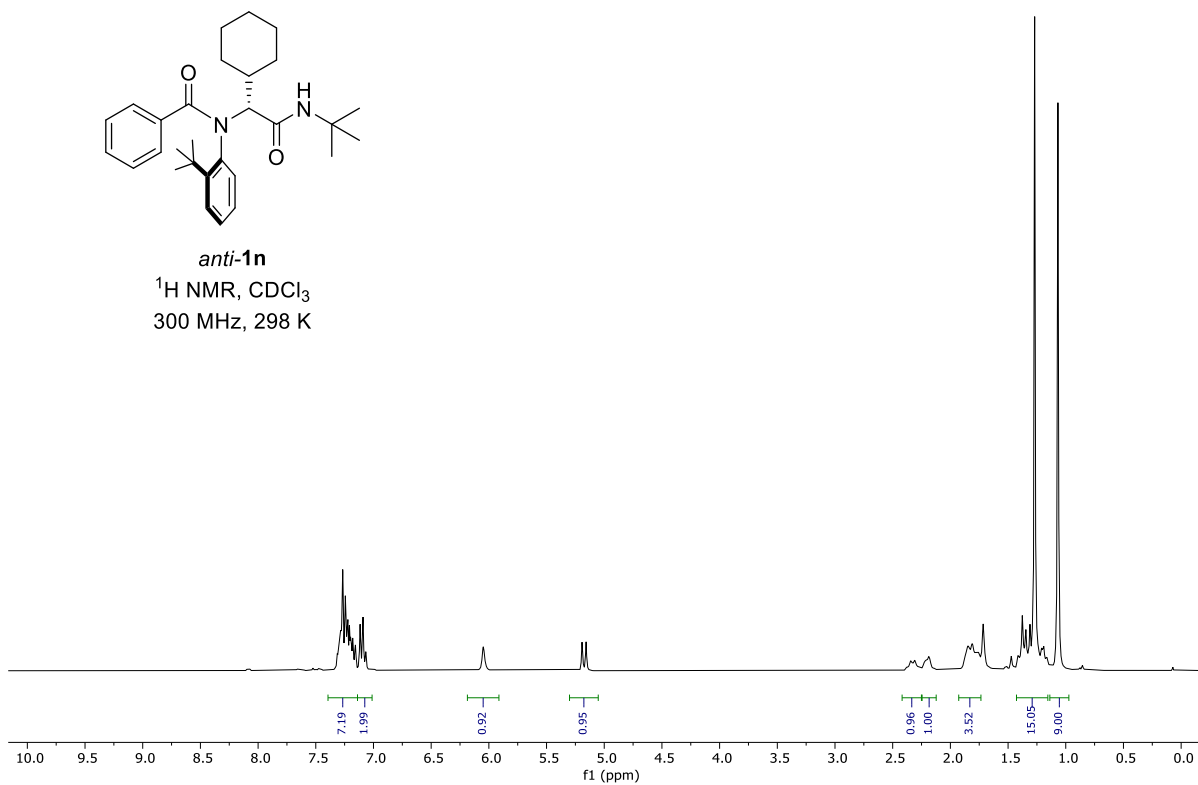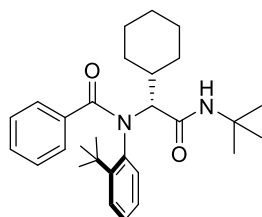

**anti-1n**  
 $^{13}\text{C NMR}$ ,  $\text{CDCl}_3$   
 75 MHz, 298 K

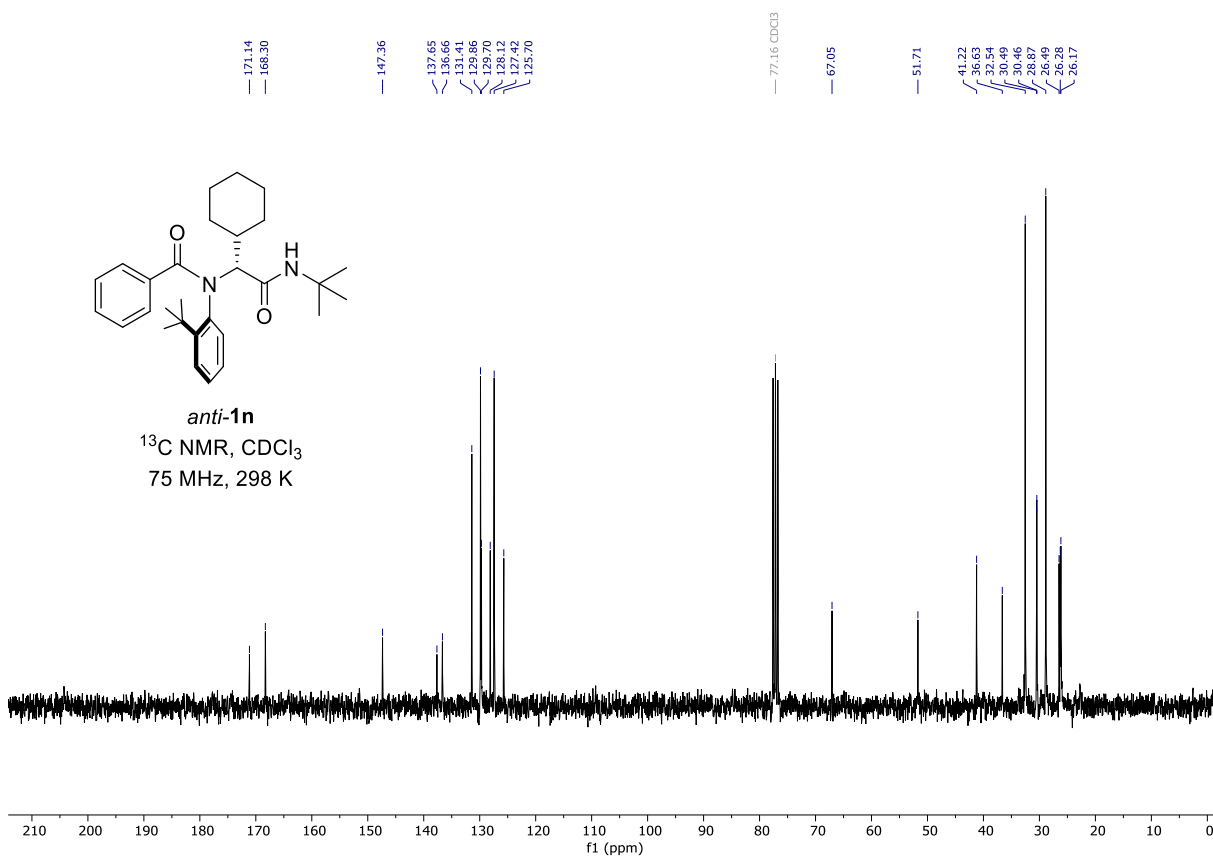

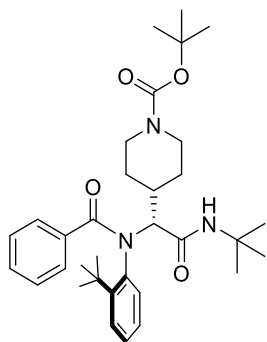

*anti-1o*

<sup>1</sup>H NMR, DMSO-d<sub>6</sub>  
400 MHz, 298 K

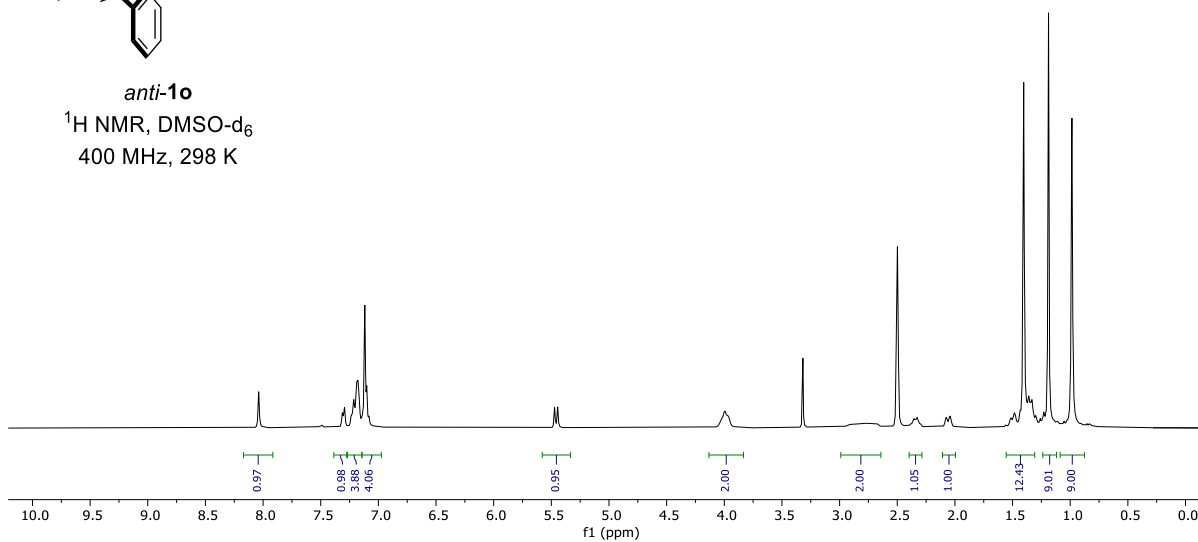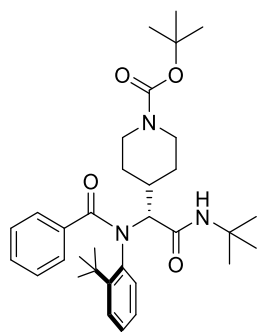

*anti-1o*

<sup>13</sup>C NMR, DMSO-d<sub>6</sub>  
101 MHz, 298 K

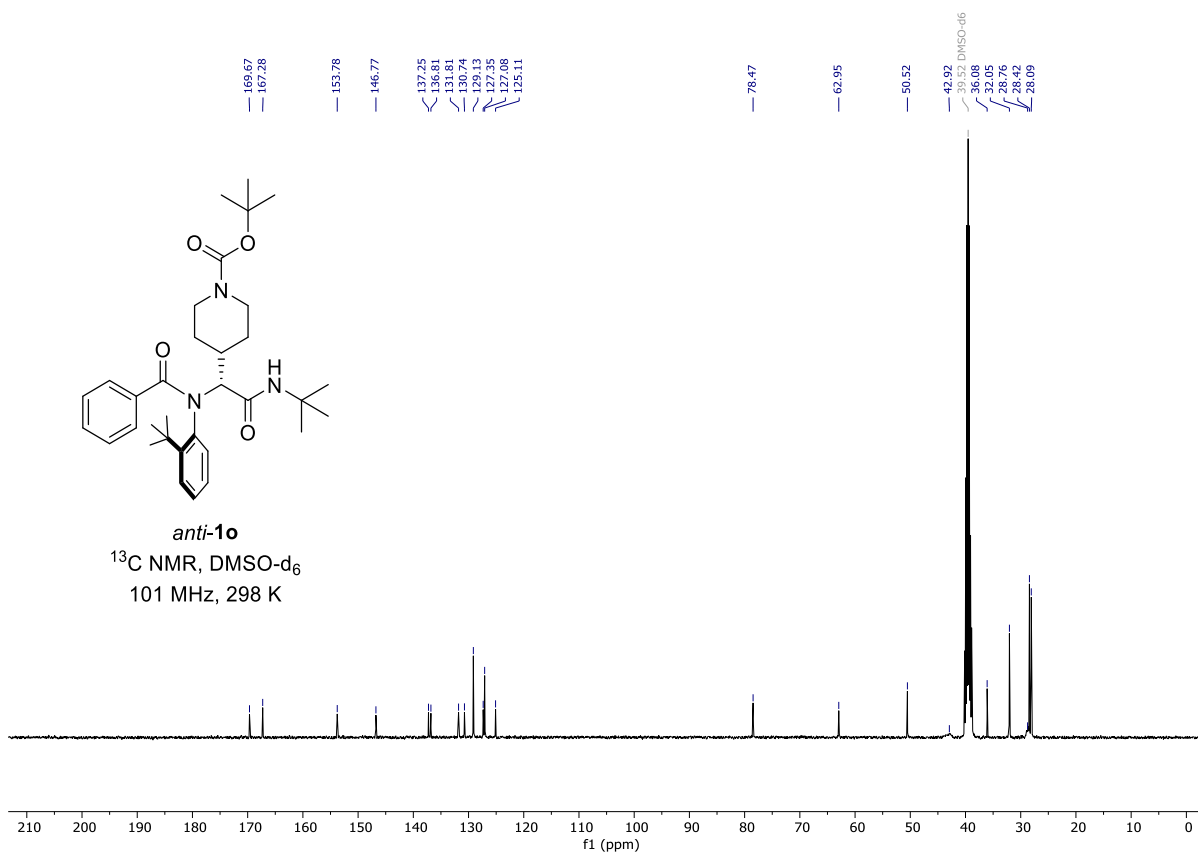

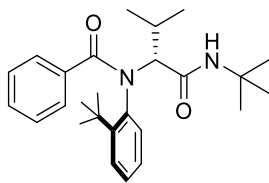

**anti-1p**

$^1\text{H NMR}$ ,  $\text{CDCl}_3$

300 MHz, 298 K

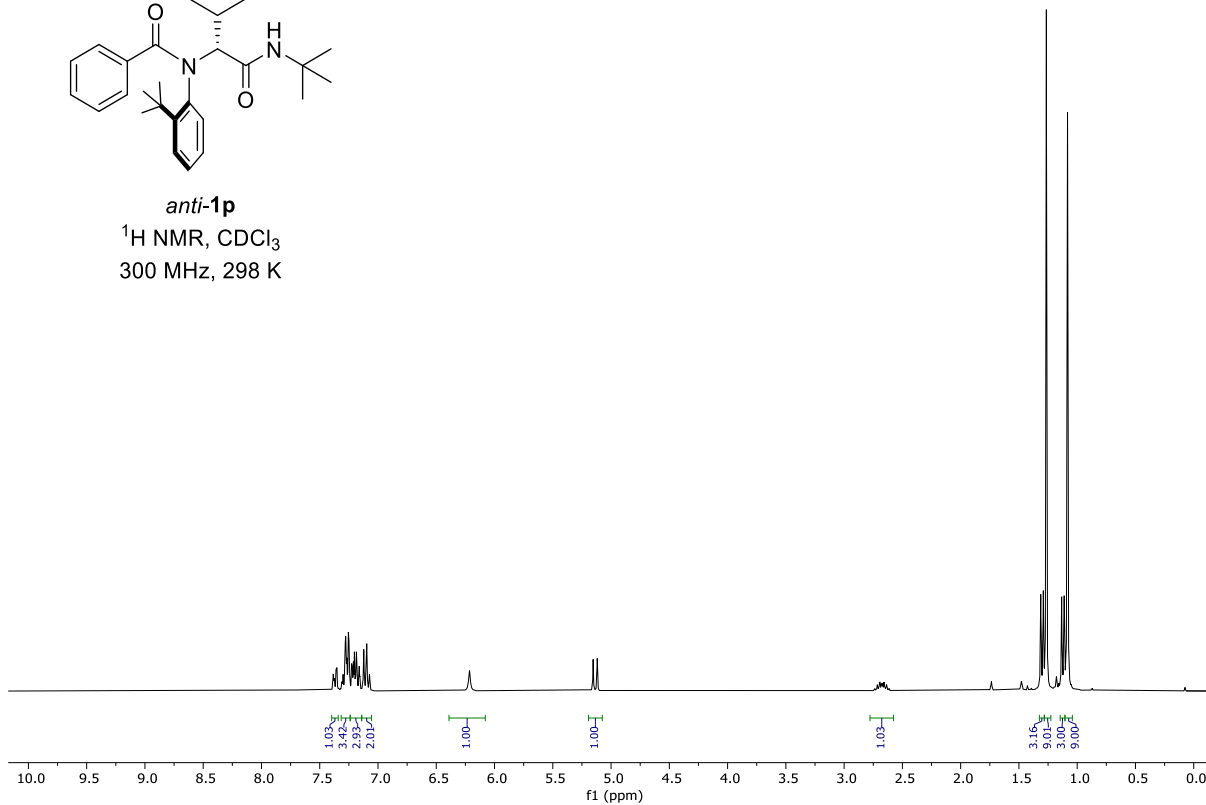

171.21  
168.52

147.31

137.71  
136.74  
135.86  
130.80  
129.88  
128.17  
127.43  
125.64

77.16  $\text{CDCl}_3$

68.13

51.65

36.62  
32.51  
32.14  
28.80  
20.31  
20.14

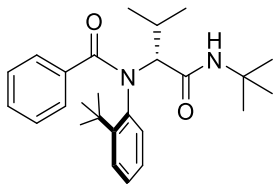

**anti-1p**

$^{13}\text{C NMR}$ ,  $\text{CDCl}_3$

75 MHz, 298 K

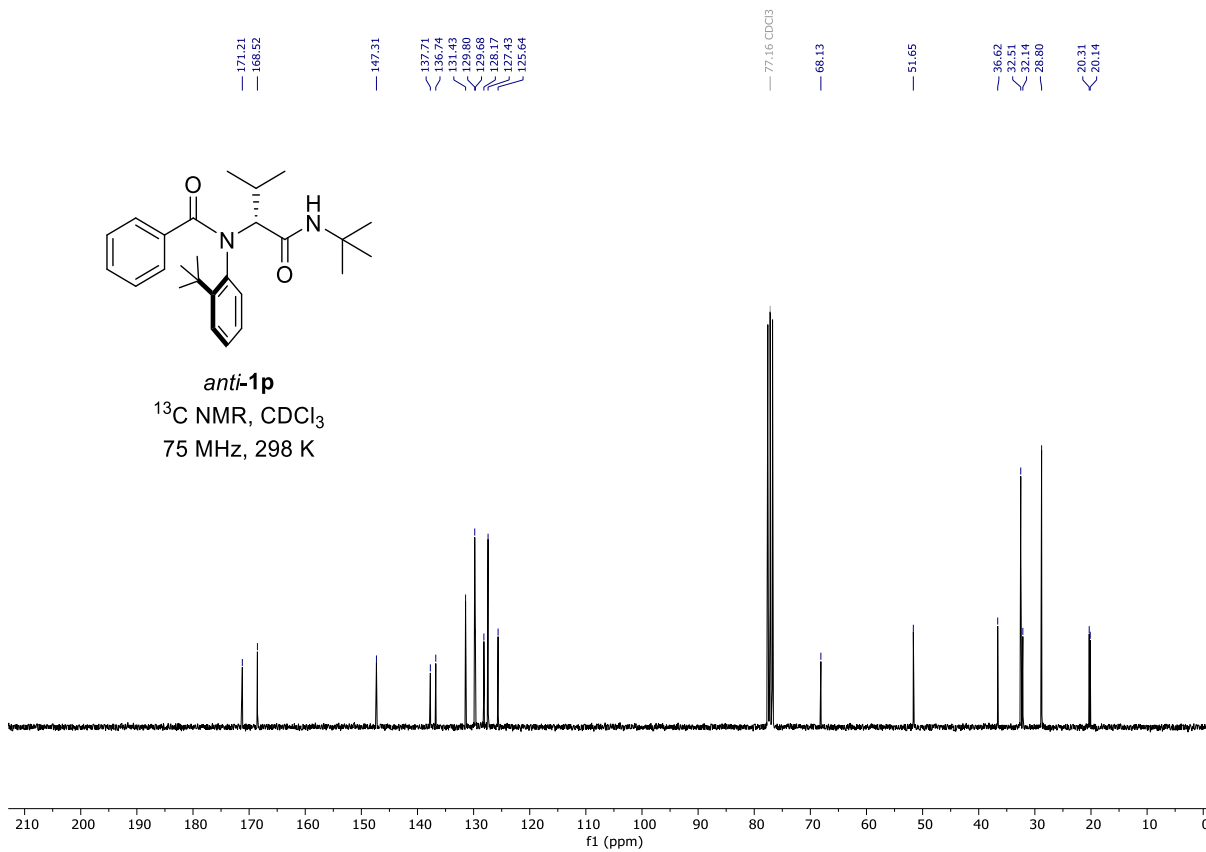

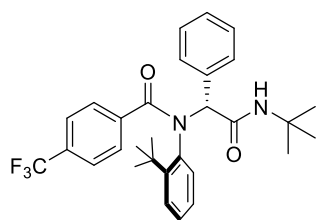

**anti-1q**

<sup>1</sup>H NMR, CDCl<sub>3</sub>  
300 MHz, 298 K

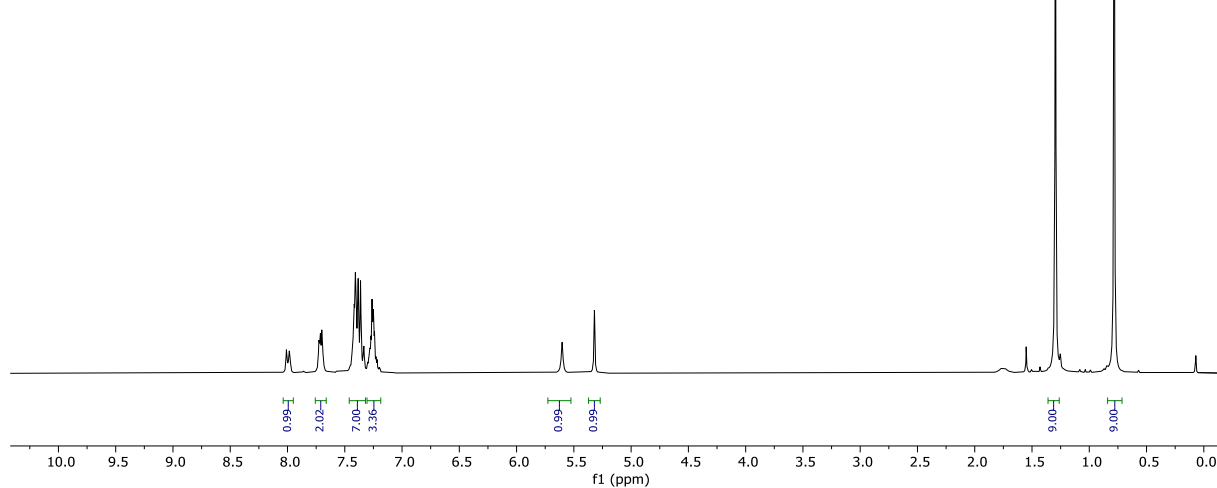

169.32  
167.70  
146.83  
141.16  
140.08  
136.33  
132.18  
131.52  
131.10  
130.83  
130.07  
129.30  
128.52  
128.37  
127.20  
125.59  
124.46  
124.41  
124.36  
124.31  
121.98  
77.16 CDCl<sub>3</sub>  
75.01  
51.89  
36.19  
32.22  
28.73

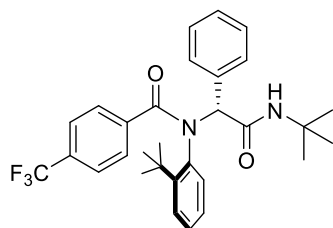

**anti-1q**

<sup>13</sup>C NMR, CDCl<sub>3</sub>  
75 MHz, 298 K

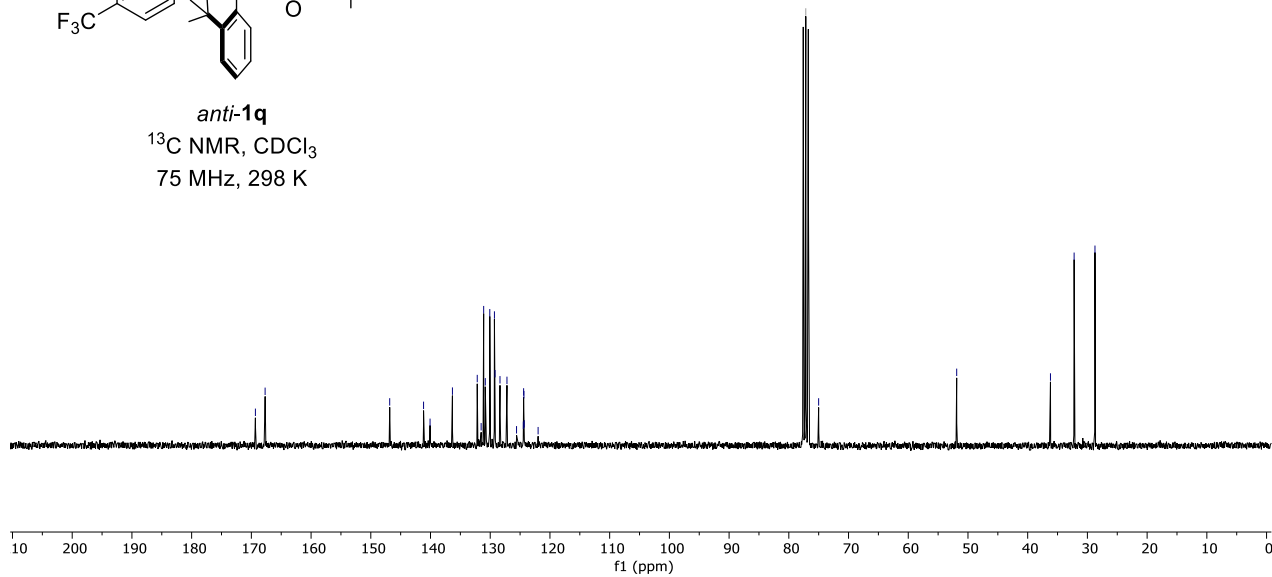

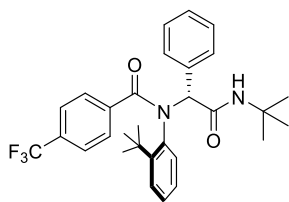

*anti-1q*

$^{19}\text{F}\{^1\text{H}\}$  NMR,  $\text{CDCl}_3$   
282 MHz, 298 K

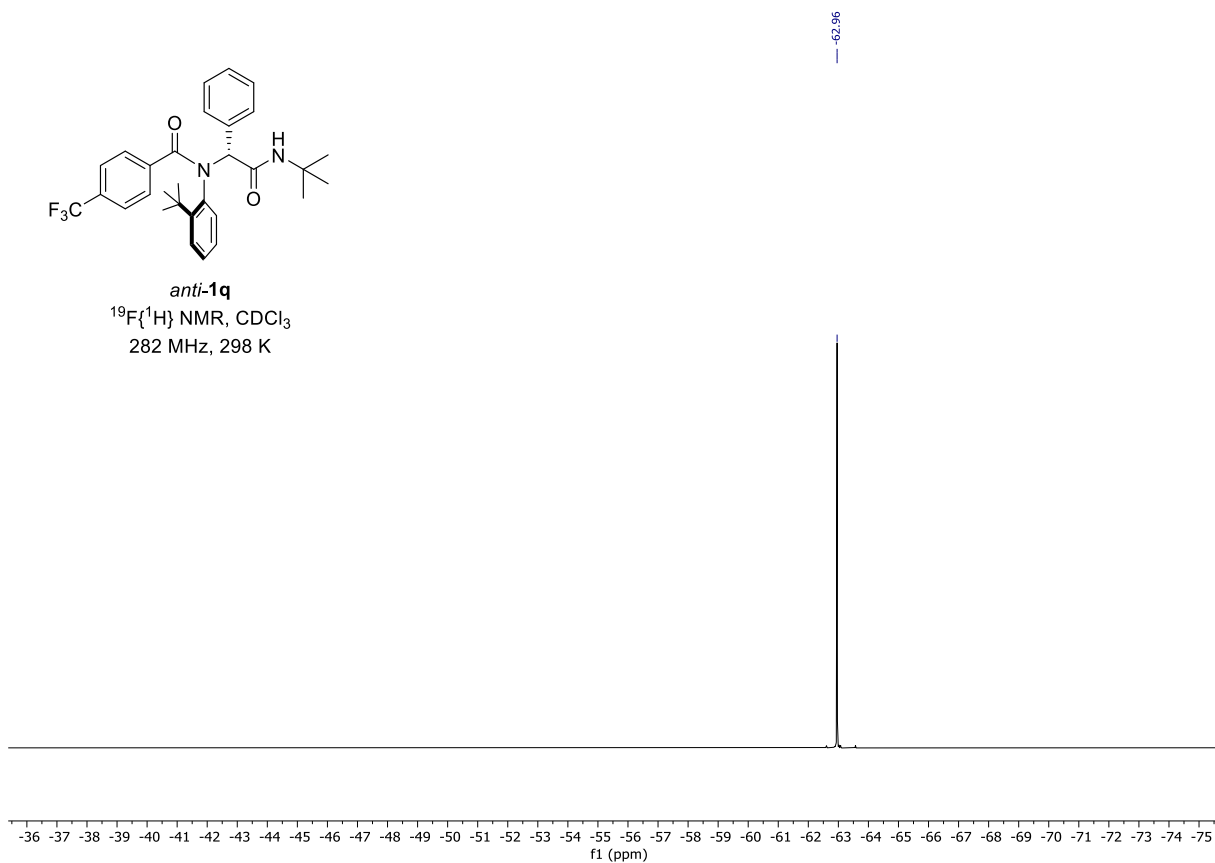

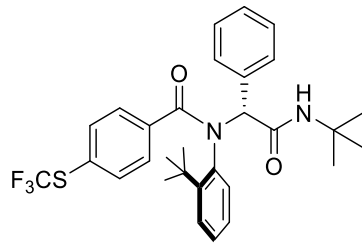

*anti-1r*

$^1\text{H NMR}$ ,  $\text{CDCl}_3$   
300 MHz, 298 K

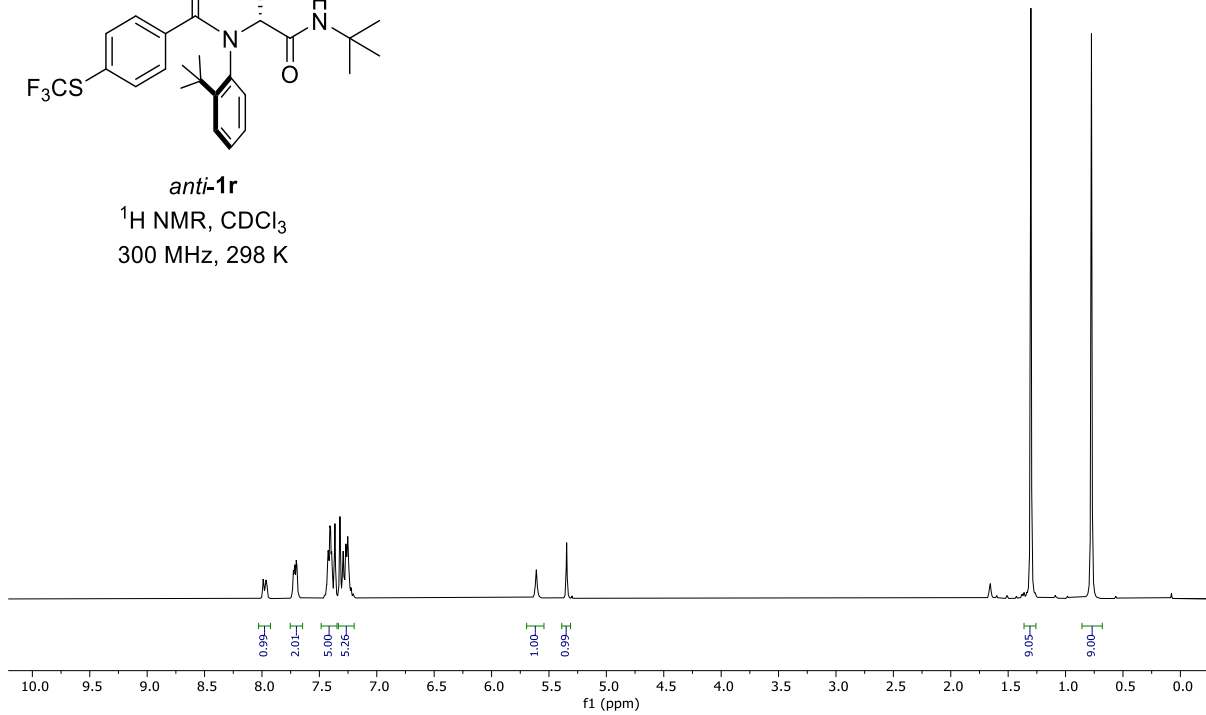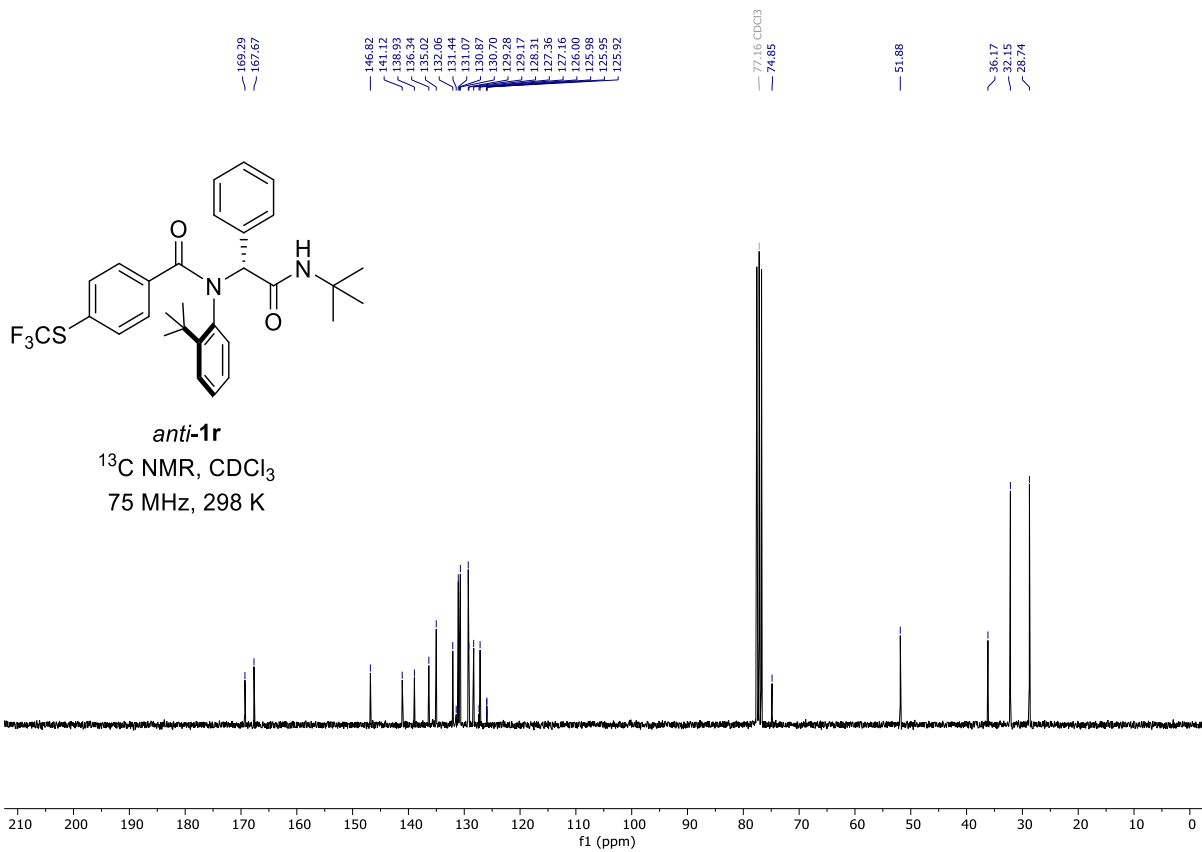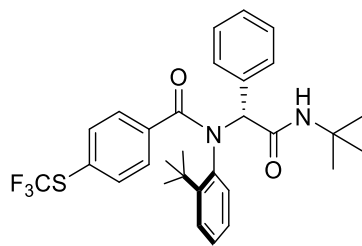

*anti-1r*

$^{13}\text{C NMR}$ ,  $\text{CDCl}_3$   
75 MHz, 298 K

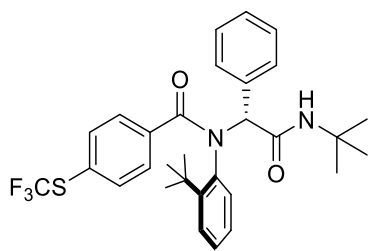

*anti-1r*

$^{19}\text{F}$  NMR,  $\text{CDCl}_3$   
282 MHz, 298 K

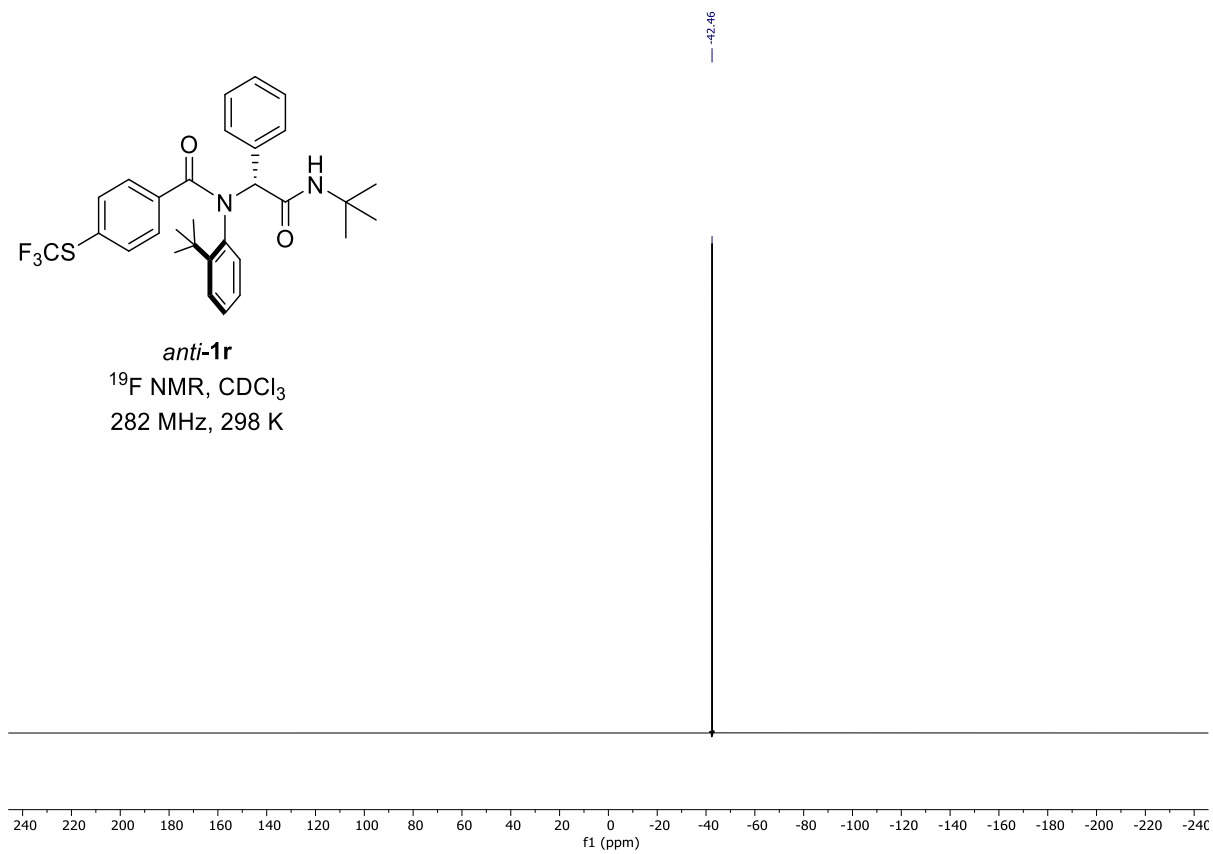



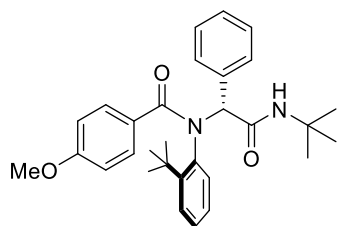

**anti-1s**

<sup>1</sup>H NMR, CDCl<sub>3</sub>  
300 MHz, 298 K

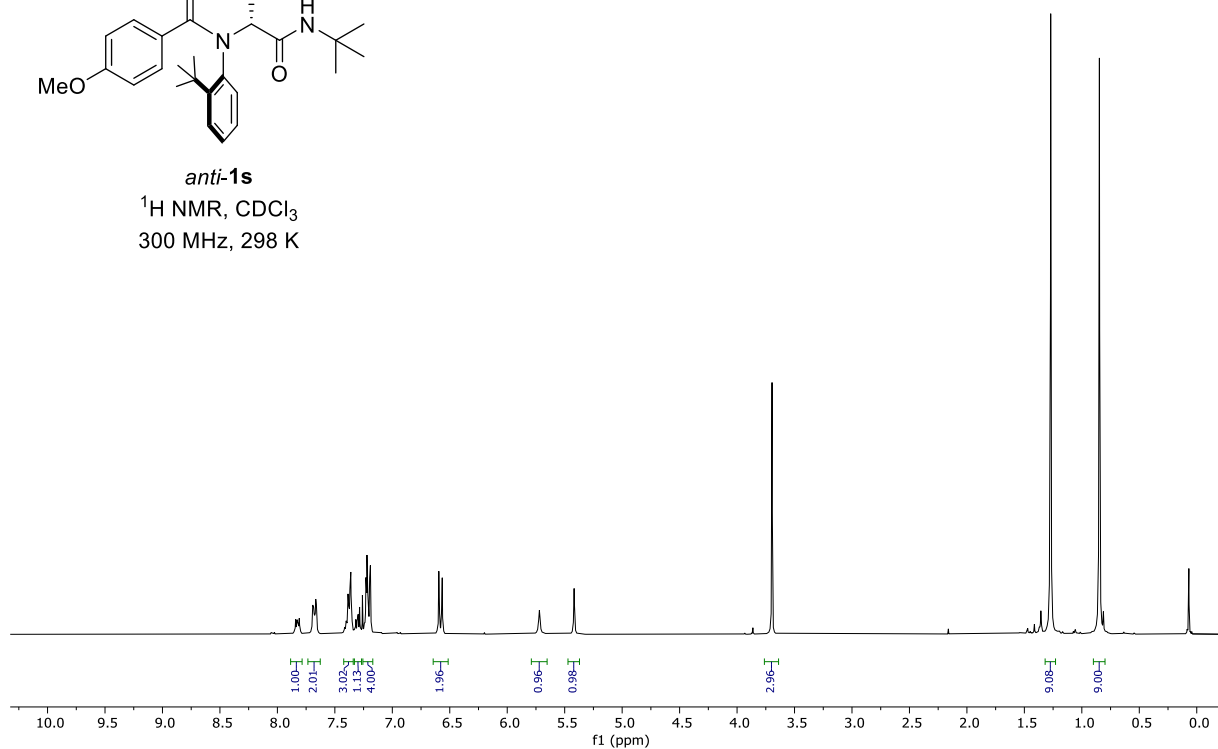

170.01  
168.06  
160.62  
146.86  
141.59  
136.80  
134.25  
131.81  
130.76  
130.67  
129.02  
128.89  
128.72  
127.91  
126.84  
112.67  
77.16 CDCl<sub>3</sub>  
74.33  
55.28  
51.66  
36.76  
32.19  
28.71

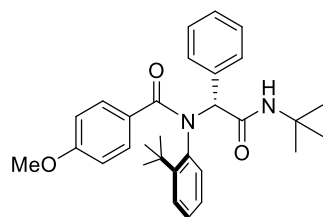

**anti-1s**

<sup>13</sup>C NMR, CDCl<sub>3</sub>  
75 MHz, 298 K

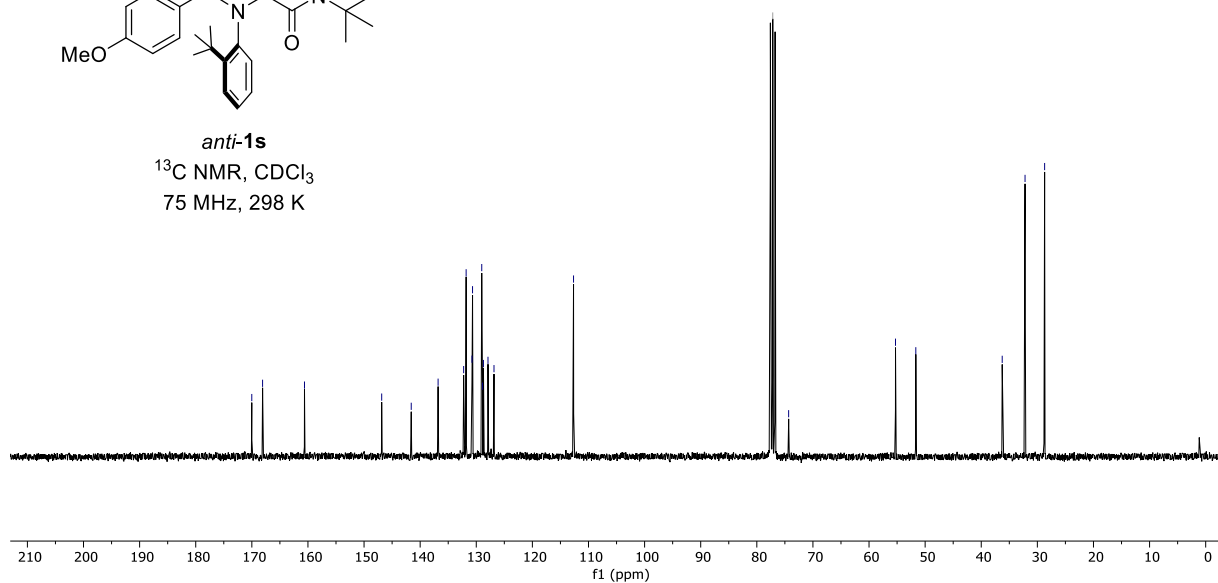

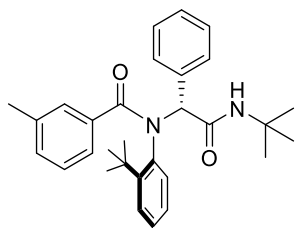

*anti-1t*

$^1\text{H}$  NMR,  $\text{CDCl}_3$   
300 MHz, 298 K

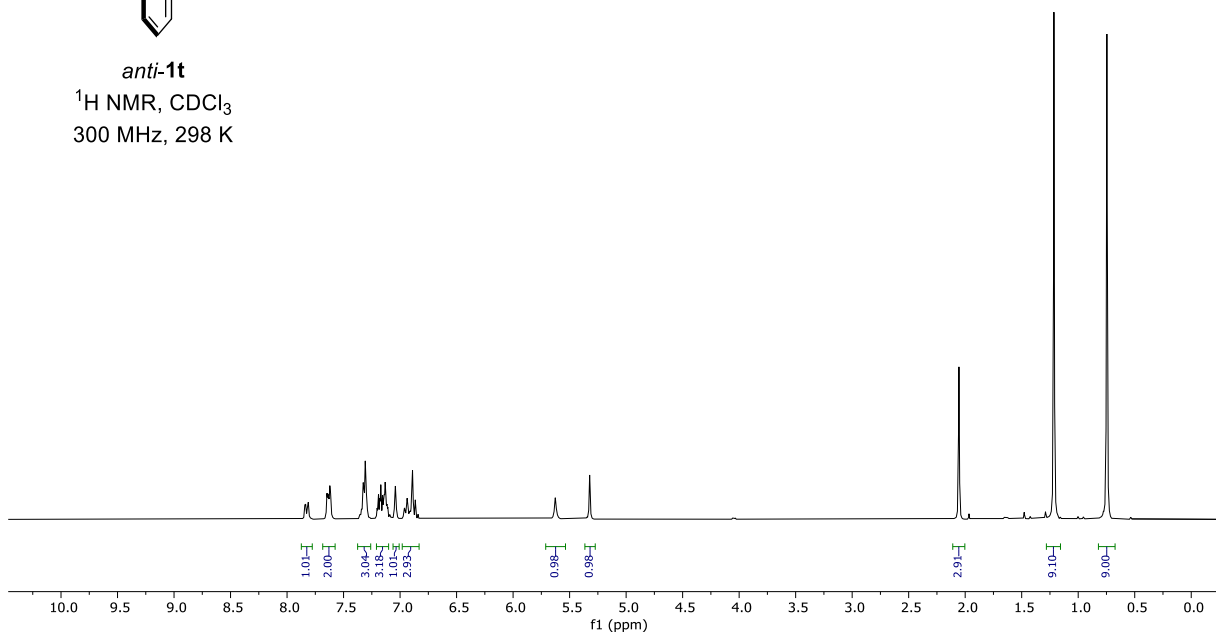

170.71  
168.02

146.79  
141.45  
138.96  
136.74  
132.74  
132.36  
130.86  
130.64  
130.57  
130.28  
128.08  
126.82  
122.18  
126.79  
126.70

77.16  $\text{CDCl}_3$   
74.40

51.70

36.21  
35.77  
28.71

21.21

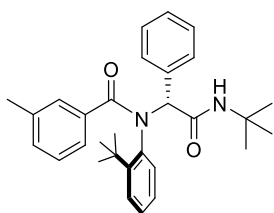

*anti-1t*

$^{13}\text{C}$  NMR,  $\text{CDCl}_3$   
75 MHz, 298 K

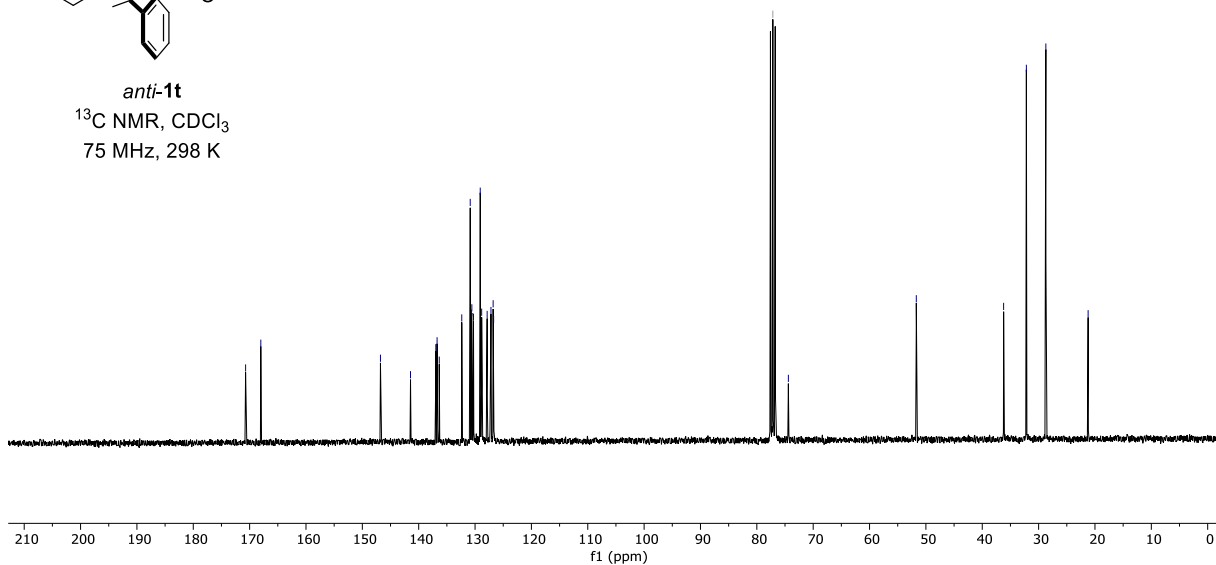

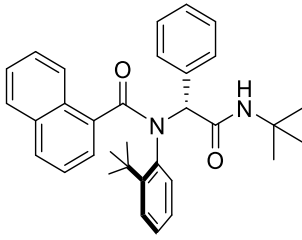

**anti-1u**  
<sup>1</sup>H NMR, CDCl<sub>3</sub>  
 300 MHz, 298 K

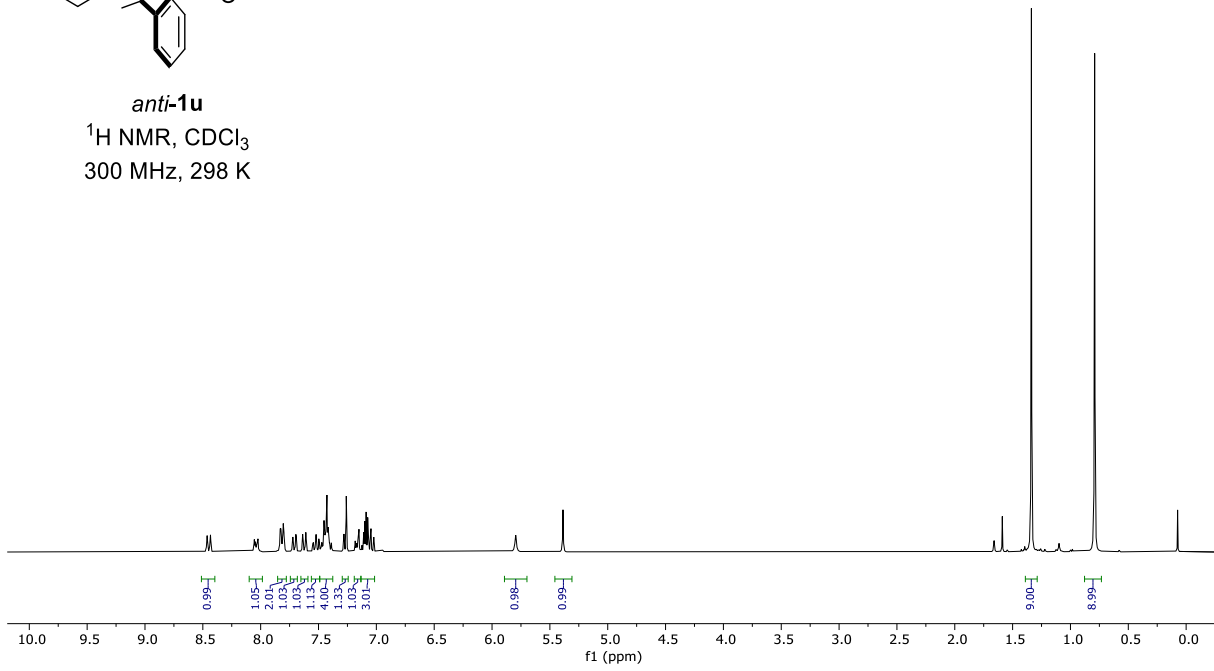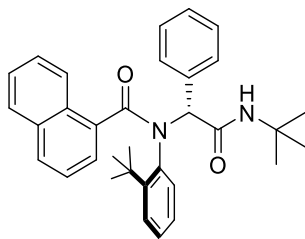

**anti-1u**  
<sup>13</sup>C NMR, CDCl<sub>3</sub>  
 75 MHz, 298 K

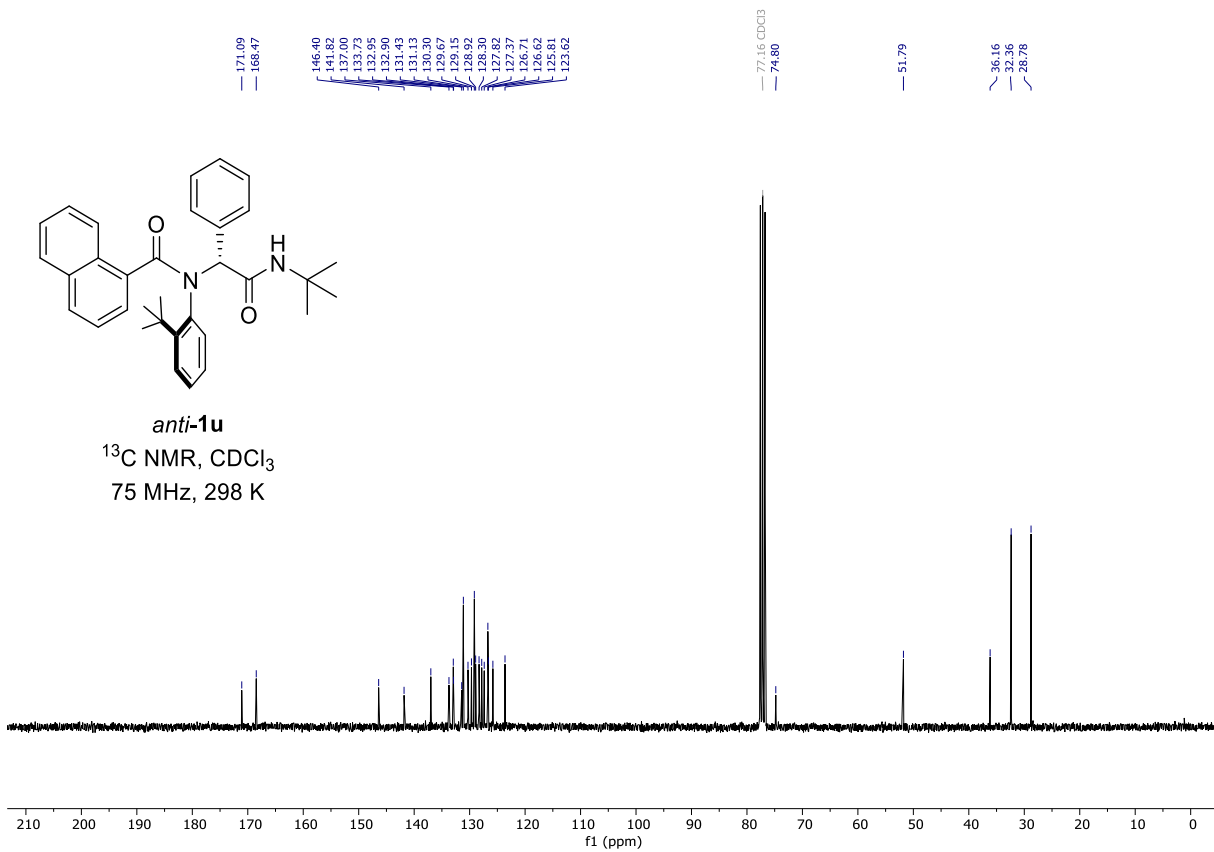

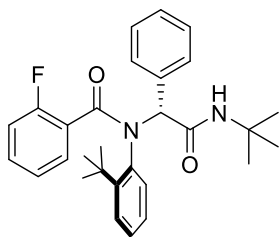

*anti-1v*  
<sup>1</sup>H NMR, CDCl<sub>3</sub>  
 300 MHz, 298 K

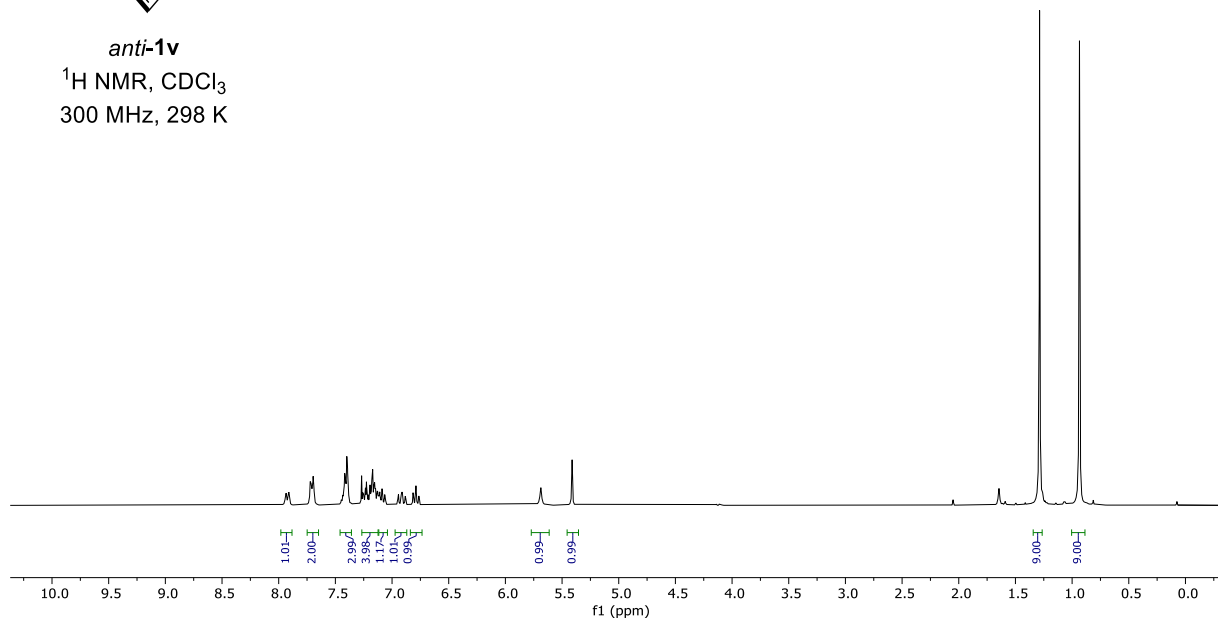

- 167.85
- 167.28
- 161.33
- 158.00
- 147.11
- 146.37
- 137.68
- 137.68
- 131.02
- 130.91
- 130.74
- 130.44
- 130.40
- 128.16
- 128.13
- 128.11
- 126.54
- 125.10
- 124.92
- 122.93
- 122.88
- 116.17
- 115.86
- 77.16 CDCl<sub>3</sub>
- 73.91
- 51.77
- 36.29
- 32.33
- 28.68

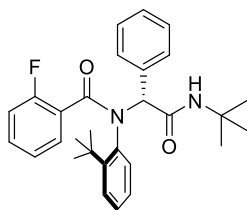

*anti-1v*  
<sup>13</sup>C NMR, CDCl<sub>3</sub>  
 75 MHz, 298 K

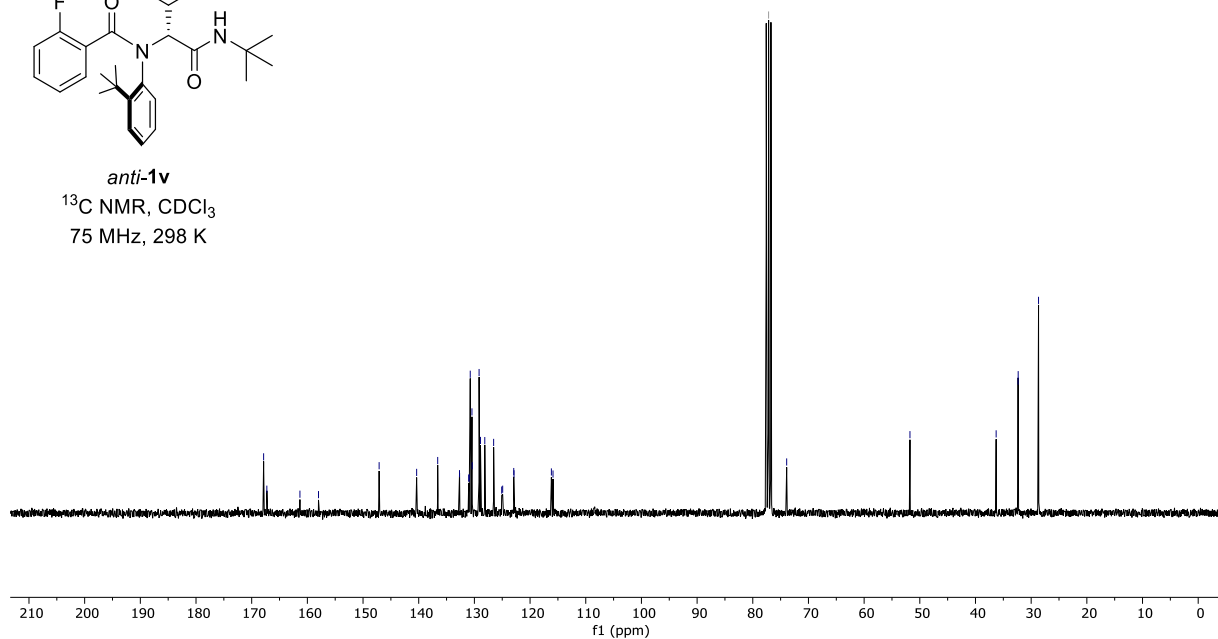

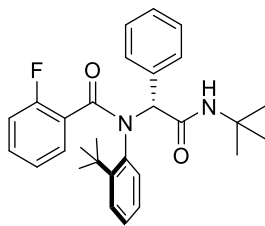

*anti-1v*

<sup>19</sup>F NMR, CDCl<sub>3</sub>  
282 MHz, 298 K

-110.00  
-110.02  
-110.04  
-110.06  
-110.08

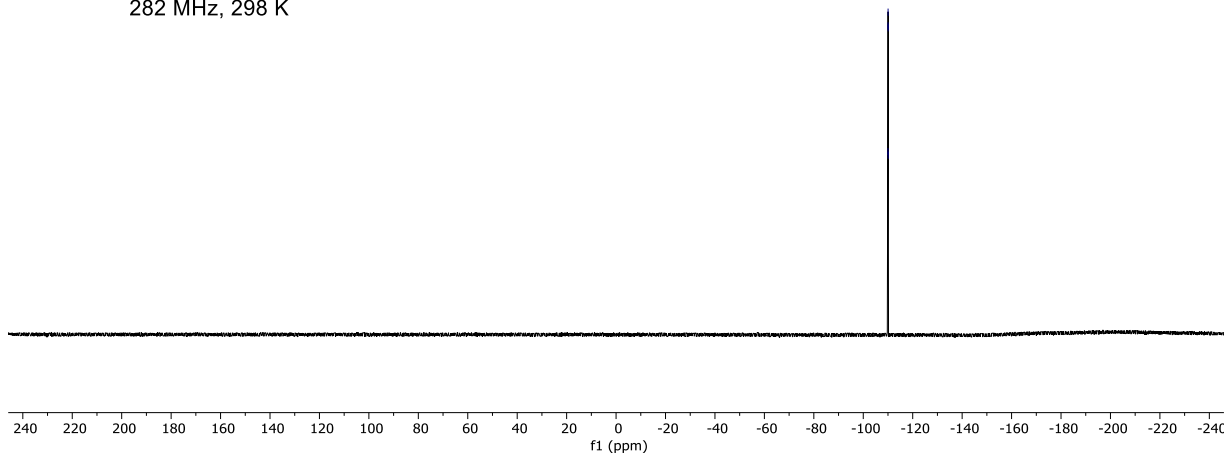

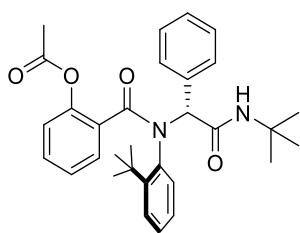

*anti-1w*

$^1\text{H}$  NMR,  $\text{CDCl}_3$   
300 MHz, 298 K

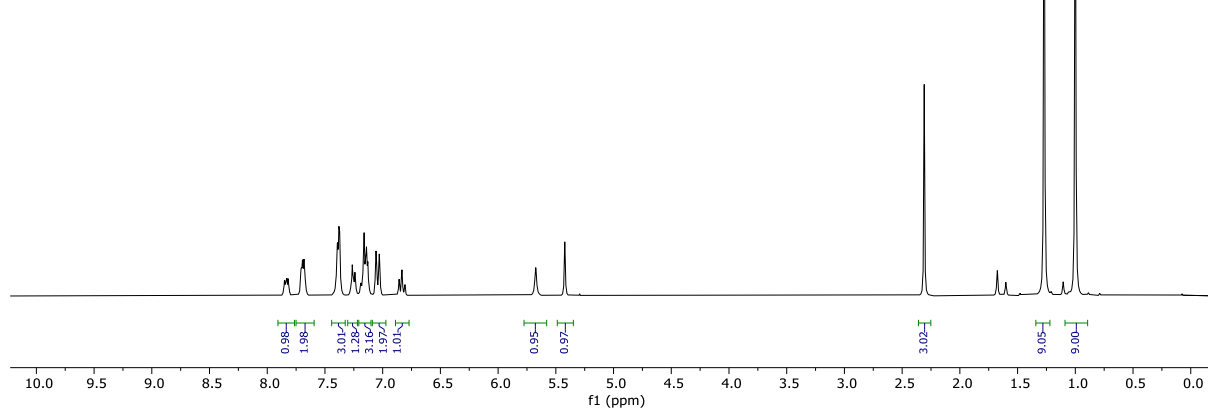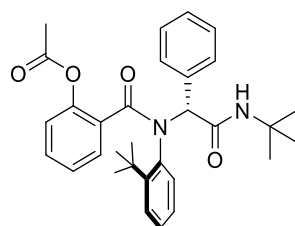

*anti-1w*

$^{13}\text{C}$  NMR,  $\text{CDCl}_3$   
75 MHz, 298 K

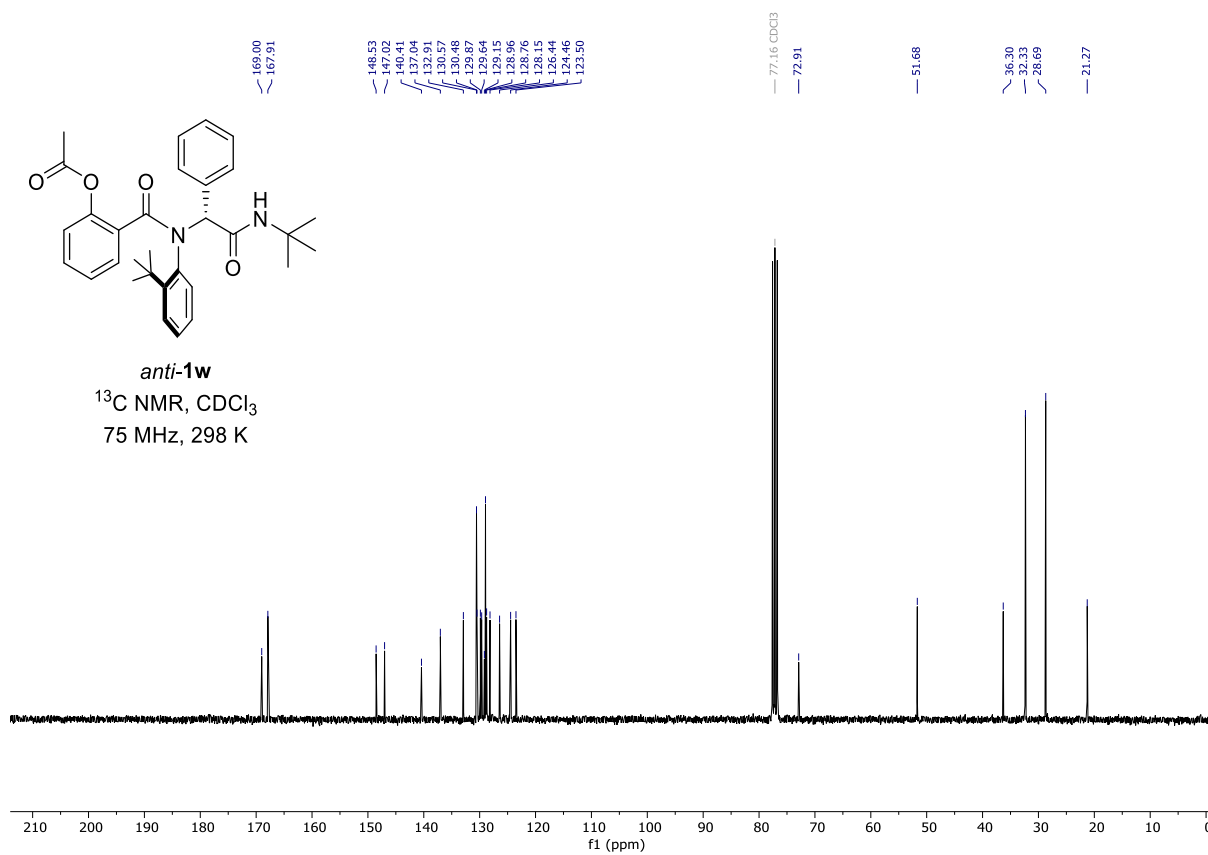

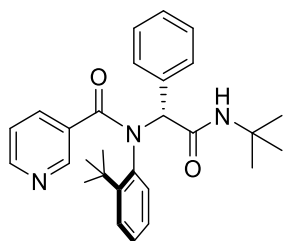

**anti-1x**

<sup>1</sup>H NMR, CDCl<sub>3</sub>  
300 MHz, 298 K

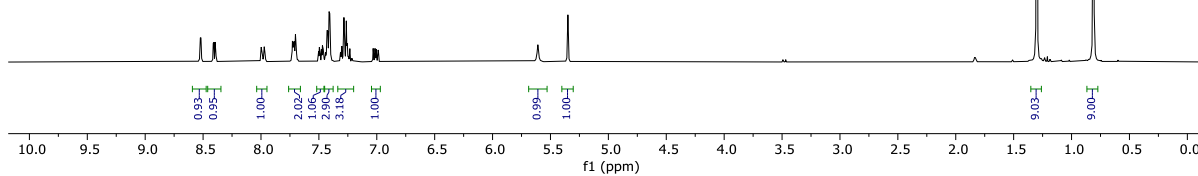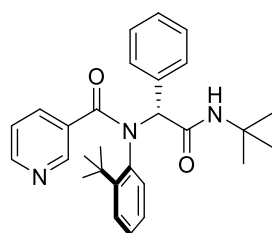

**anti-1x**

<sup>13</sup>C NMR, CDCl<sub>3</sub>  
75 MHz, 298 K

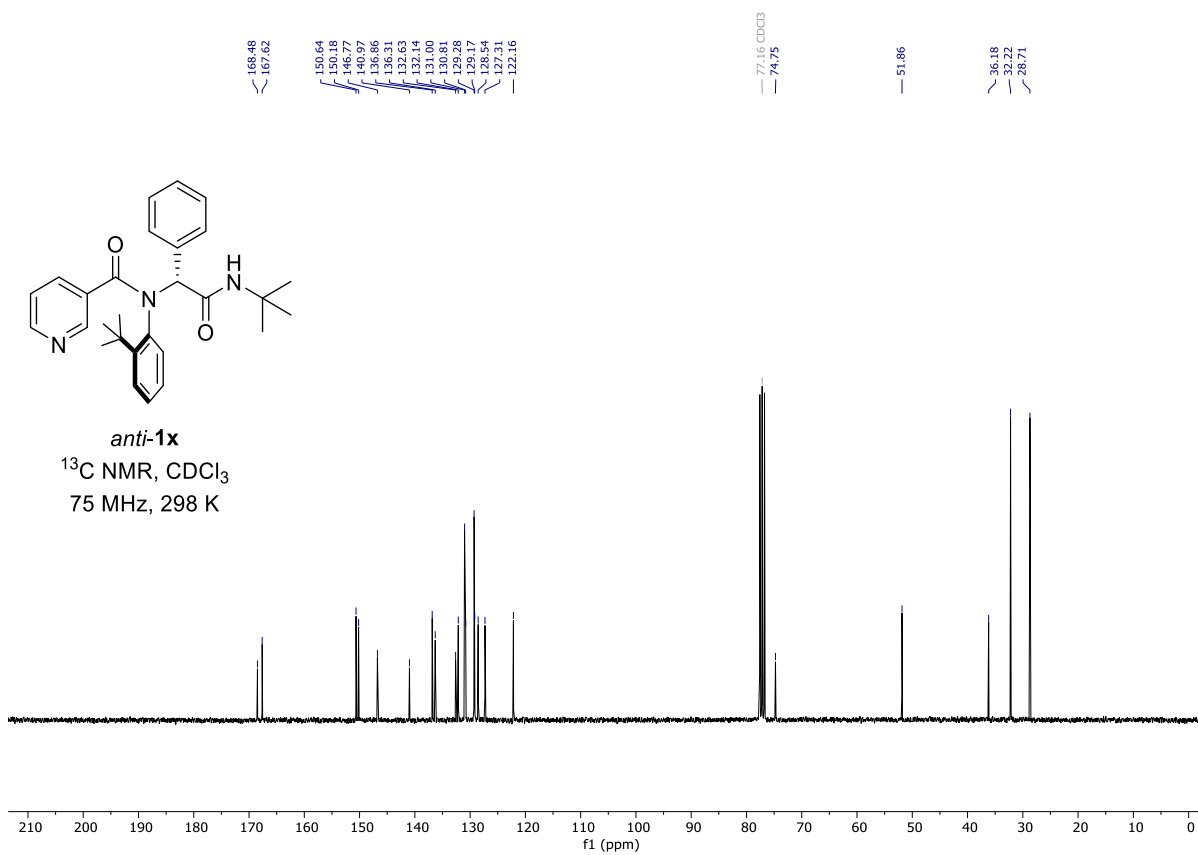

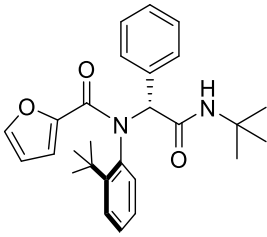

**anti-1y**  
<sup>1</sup>H NMR, CDCl<sub>3</sub>  
 300 MHz, 298 K

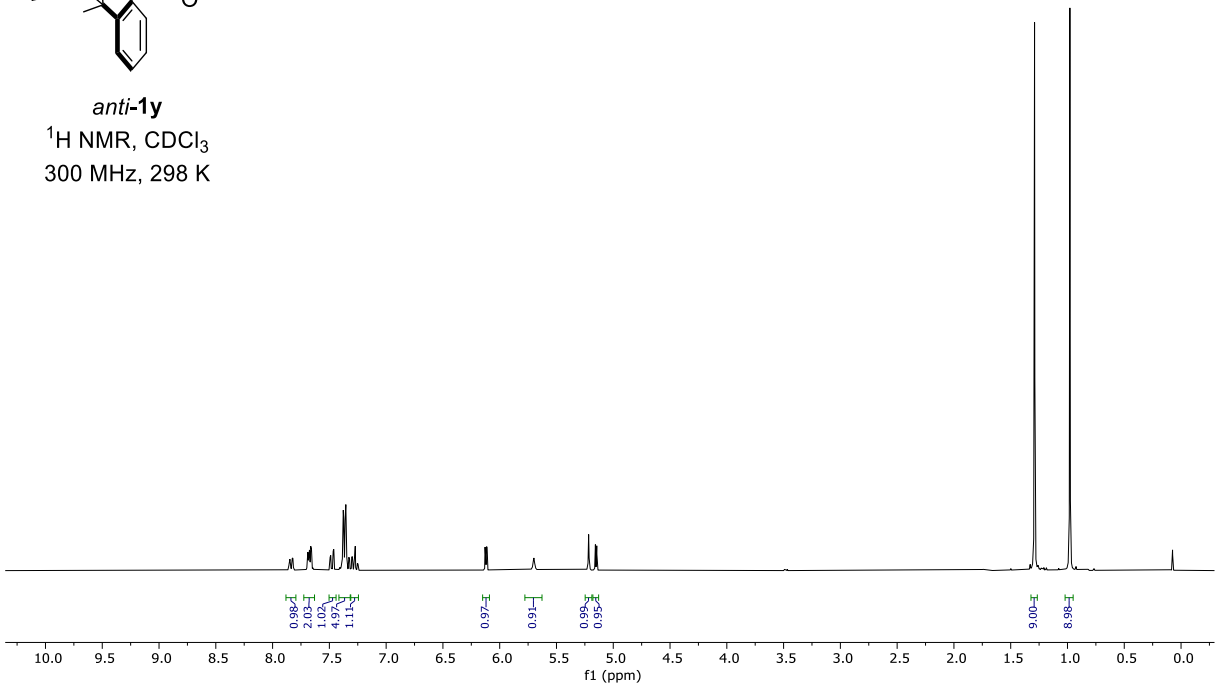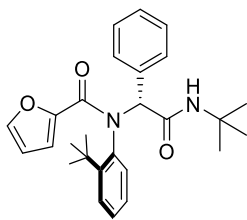

**anti-1y**  
<sup>13</sup>C NMR, CDCl<sub>3</sub>  
 75 MHz, 298 K

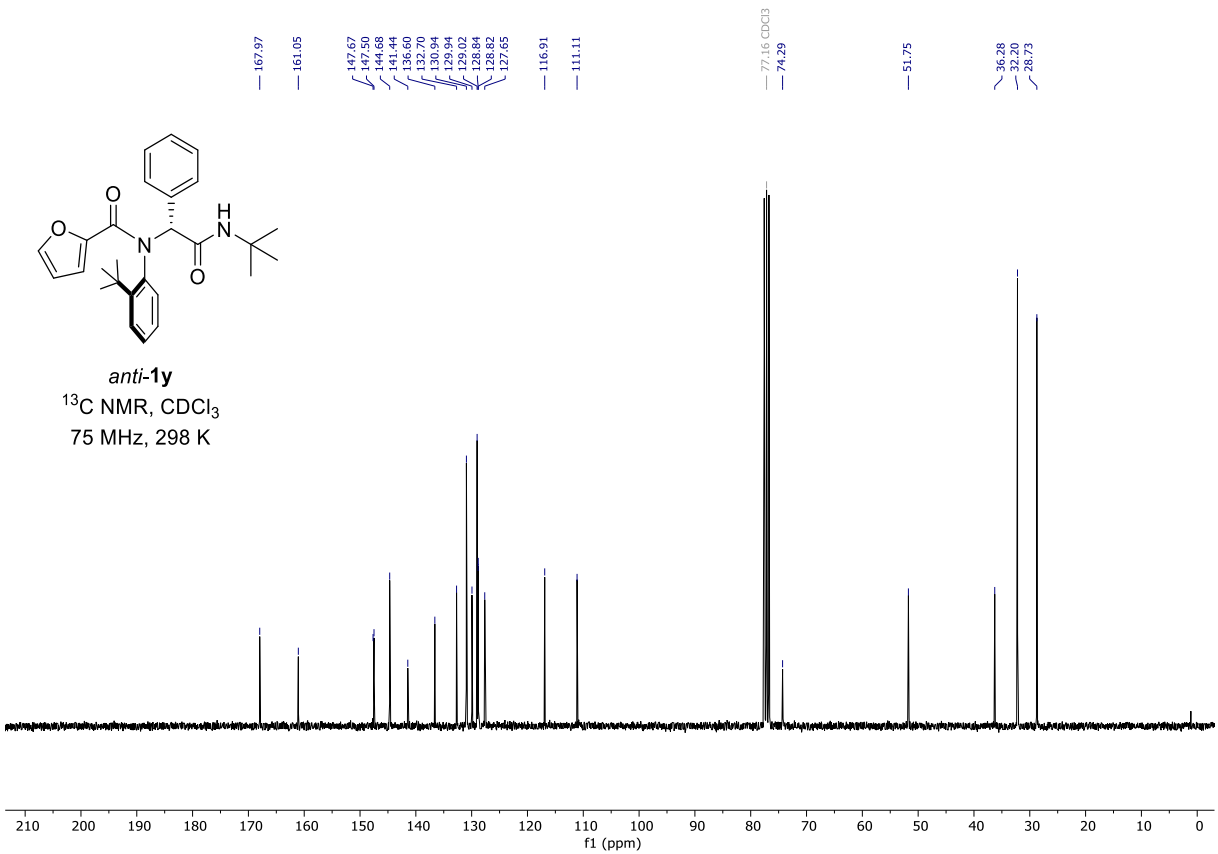



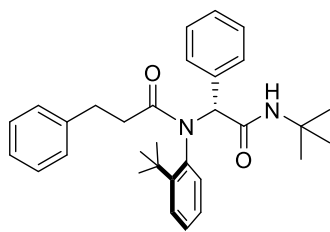

*anti-1z*

<sup>1</sup>H NMR, CDCl<sub>3</sub>  
300 MHz, 298 K

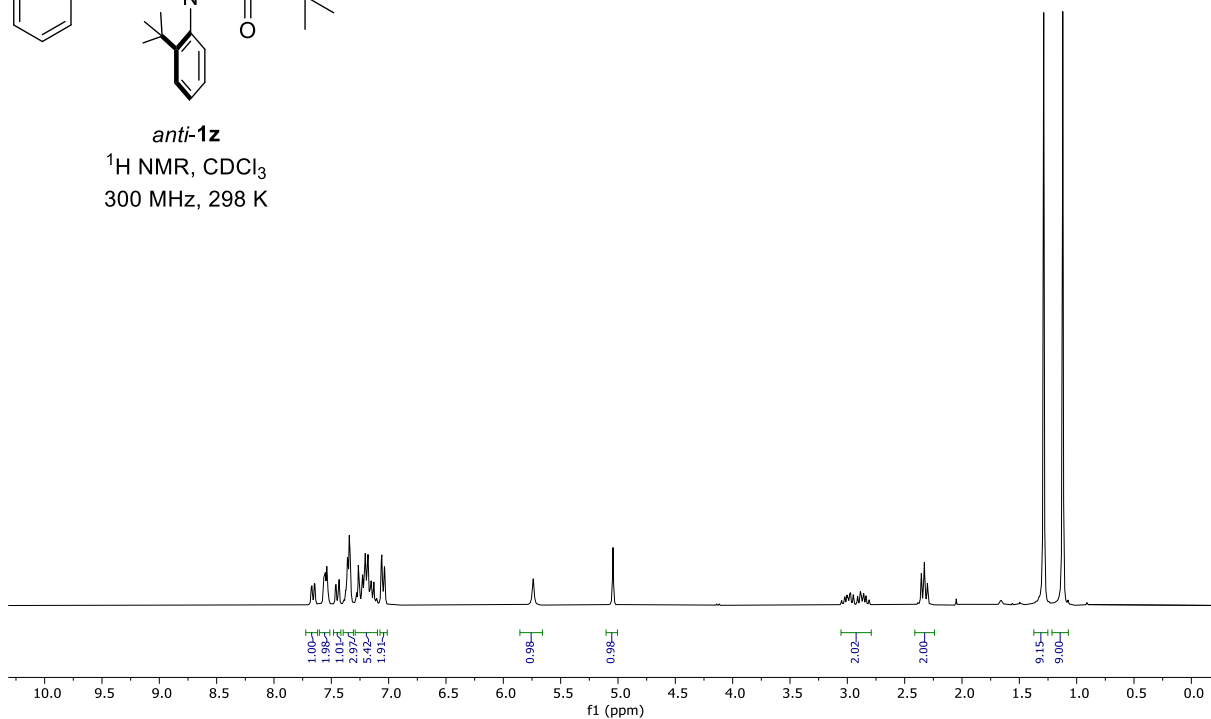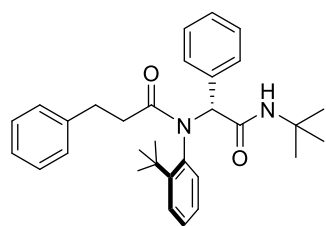

*anti-1z*

<sup>13</sup>C NMR, CDCl<sub>3</sub>  
75 MHz, 298 K

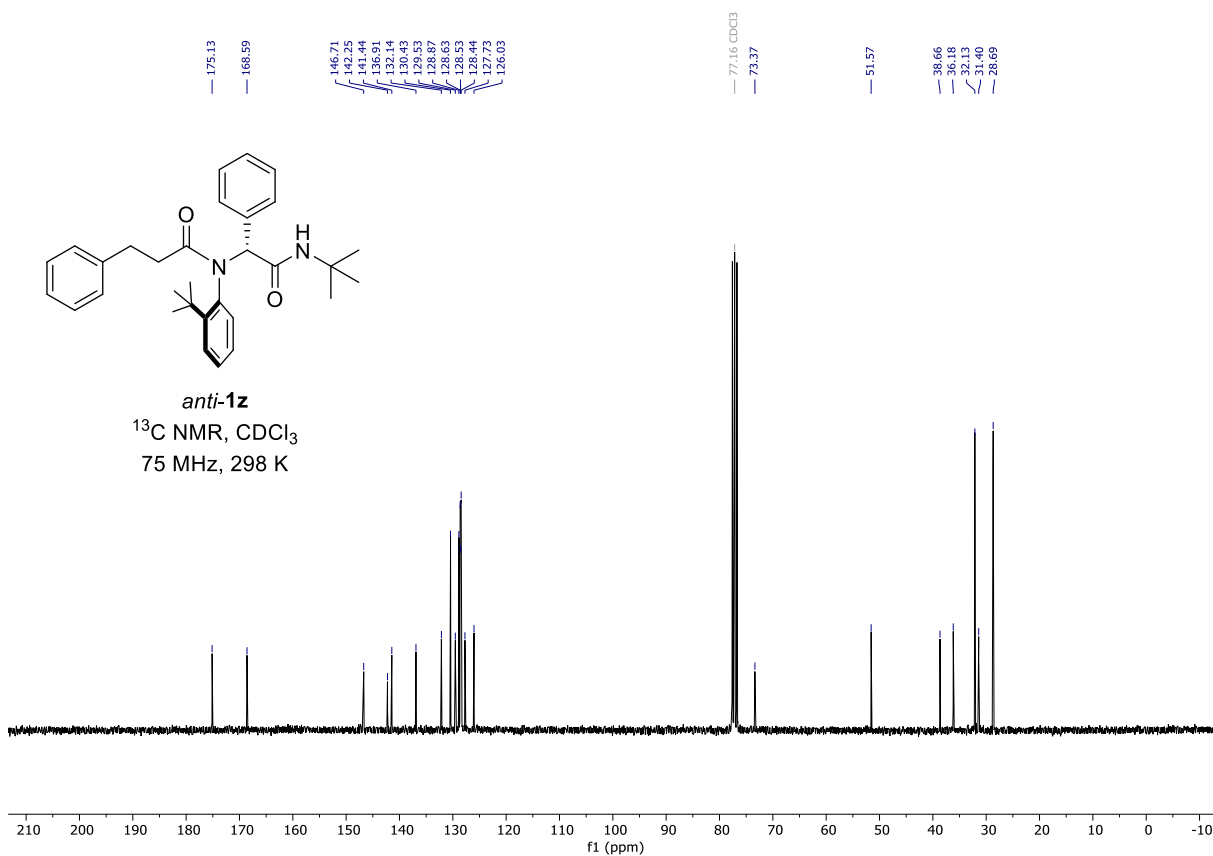

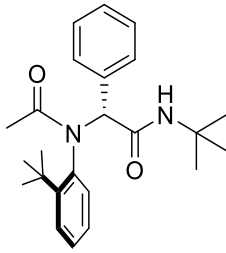

*anti-1aa*

$^1\text{H NMR}$ ,  $\text{CDCl}_3$   
300 MHz, 298 K

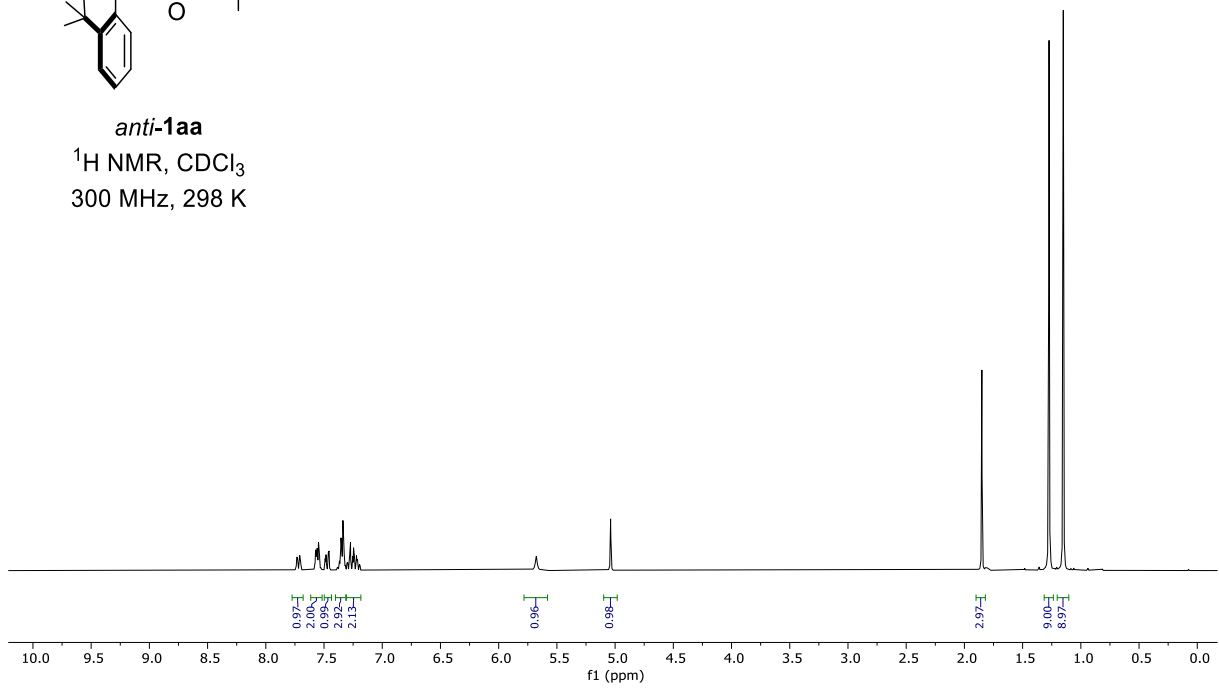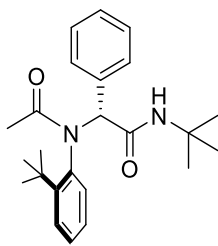

*anti-1aa*

$^{13}\text{C NMR}$ ,  $\text{CDCl}_3$   
75 MHz, 298 K

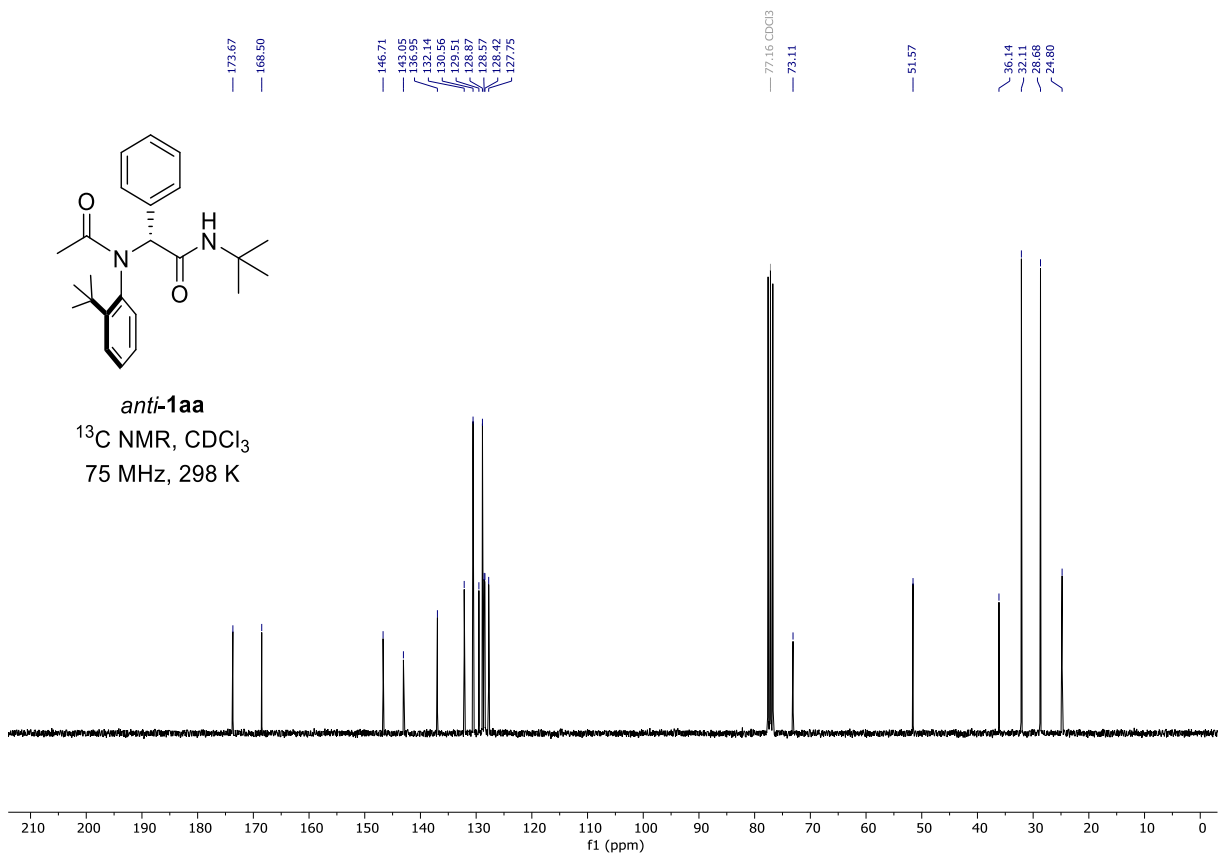

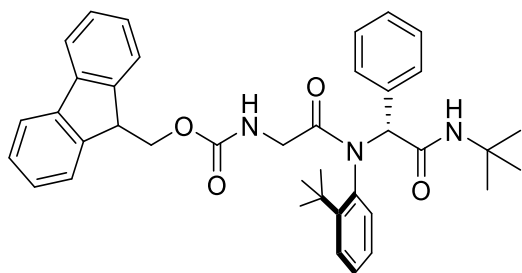

**anti-1ab**  
 $^1\text{H}$  NMR,  $\text{CDCl}_3$   
 300 MHz, 298 K

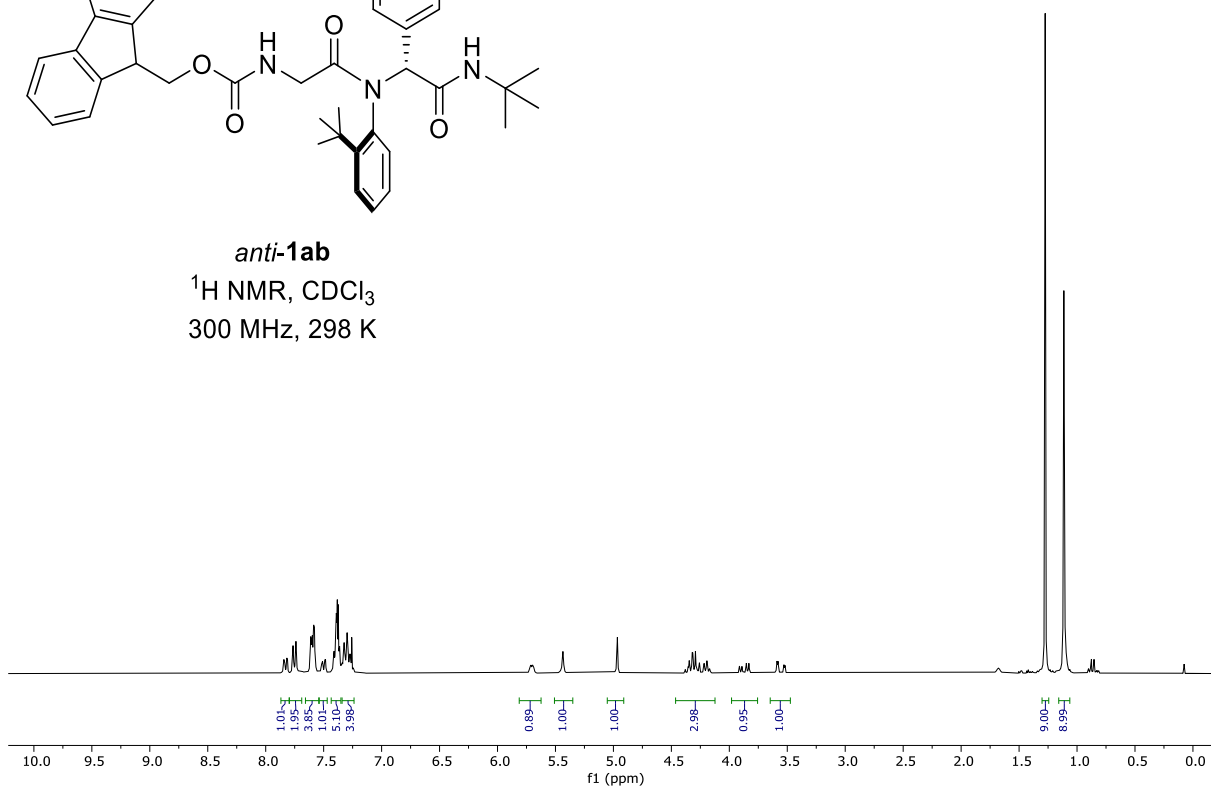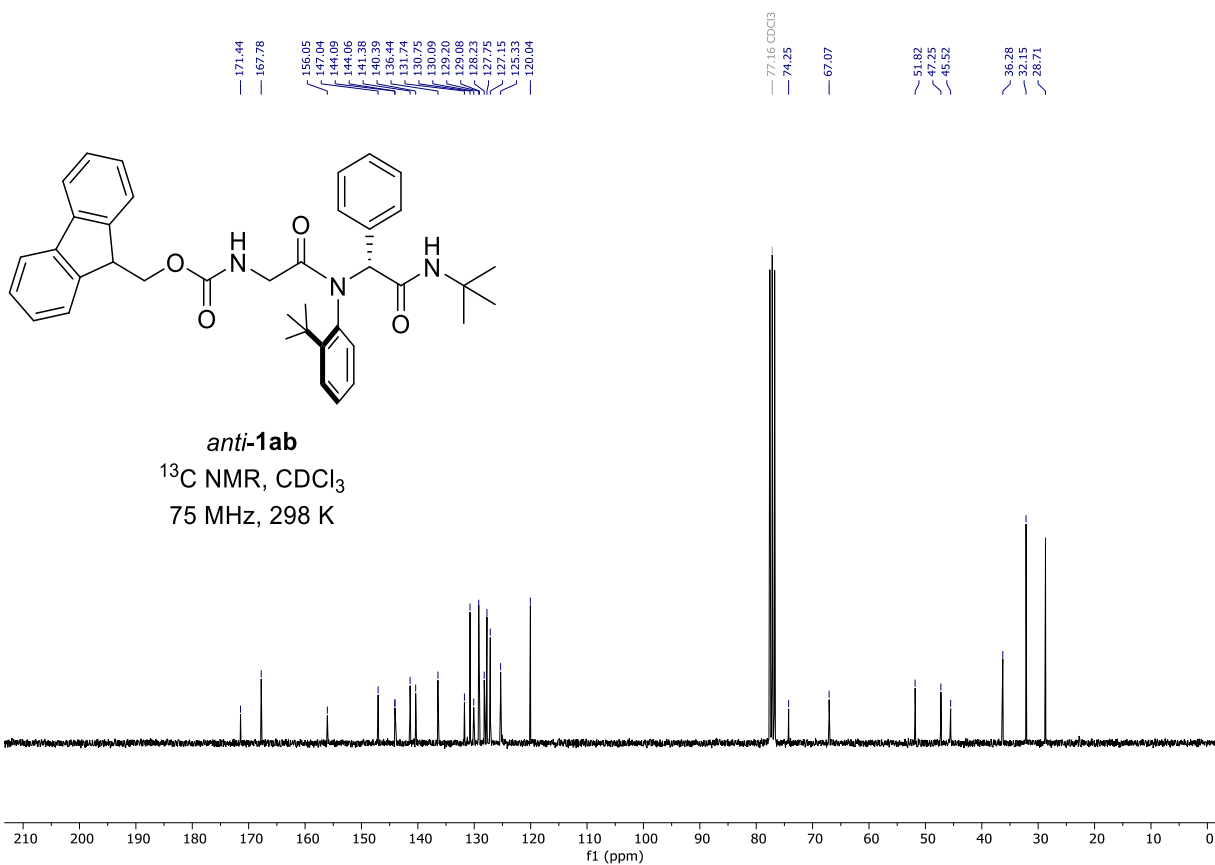

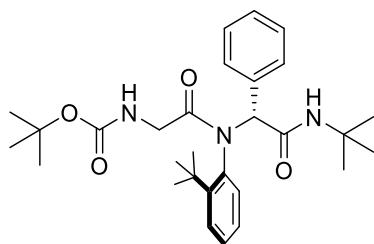

**anti-1ac**  
 $^1\text{H NMR}$ ,  $\text{CDCl}_3$   
 300 MHz, 298 K

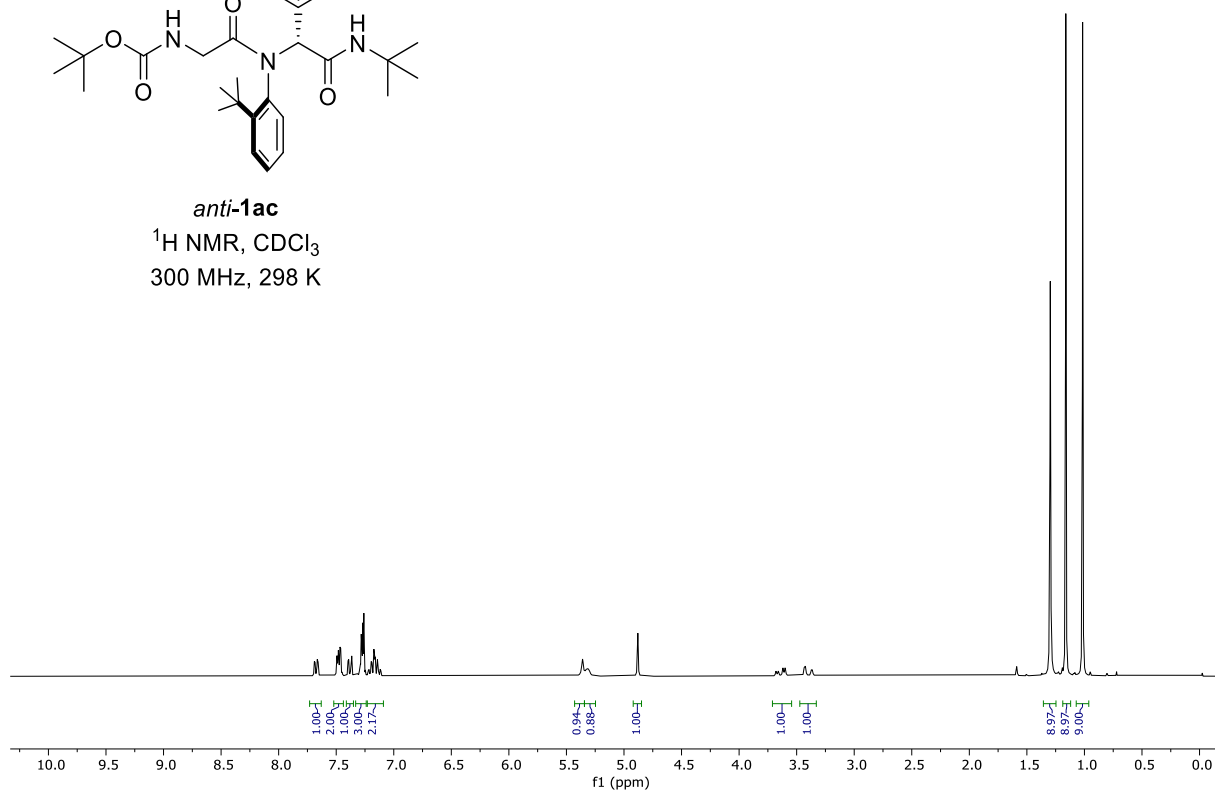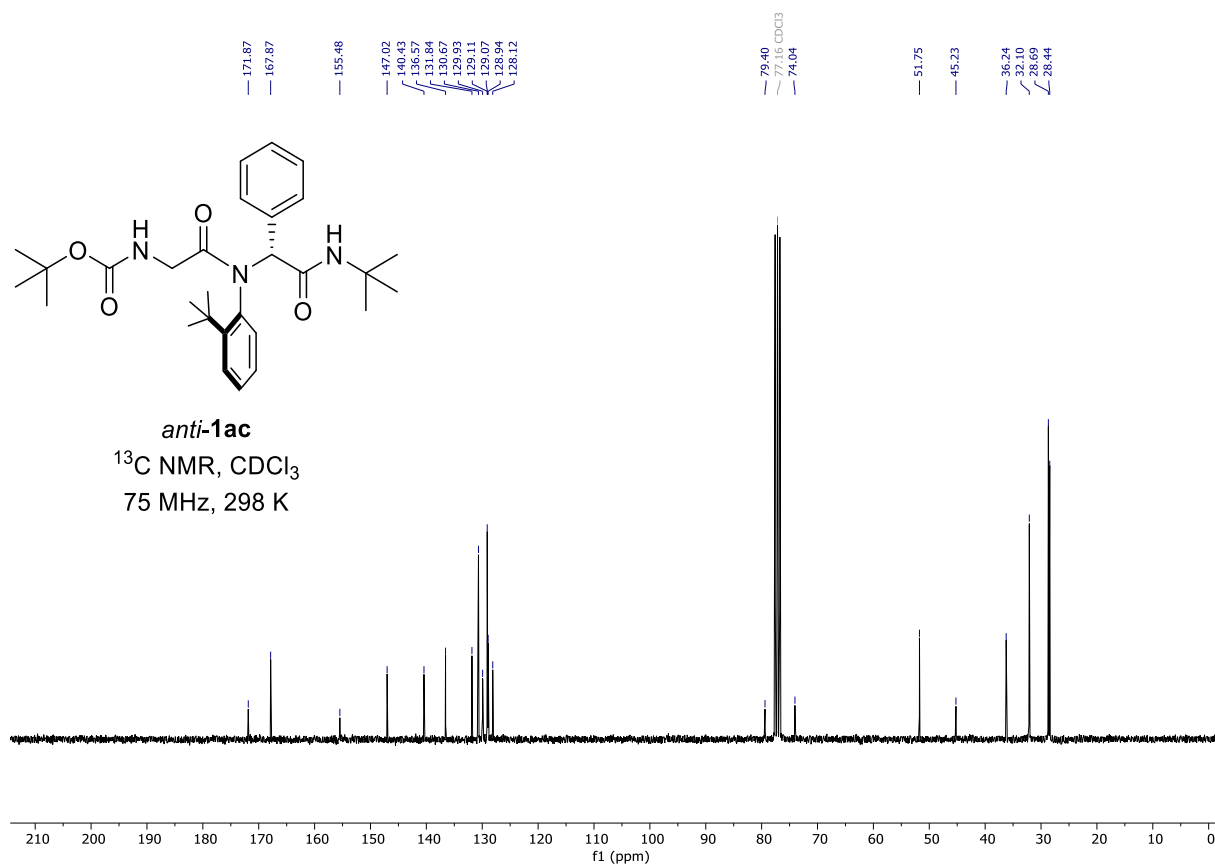

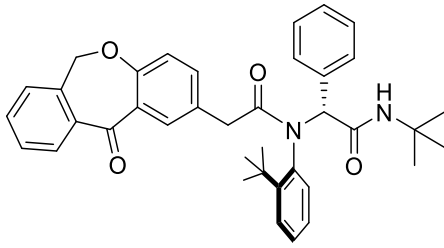

**anti-1ad**  
 $^1\text{H NMR}$ ,  $\text{CDCl}_3$   
 400 MHz, 298 K

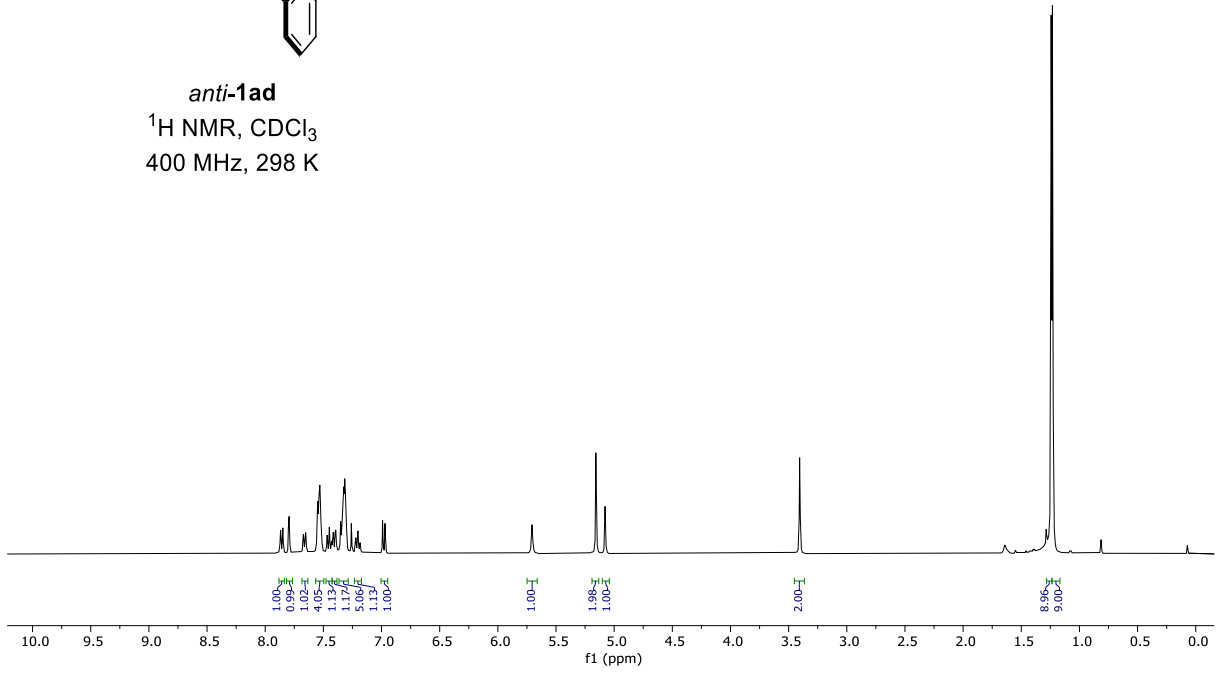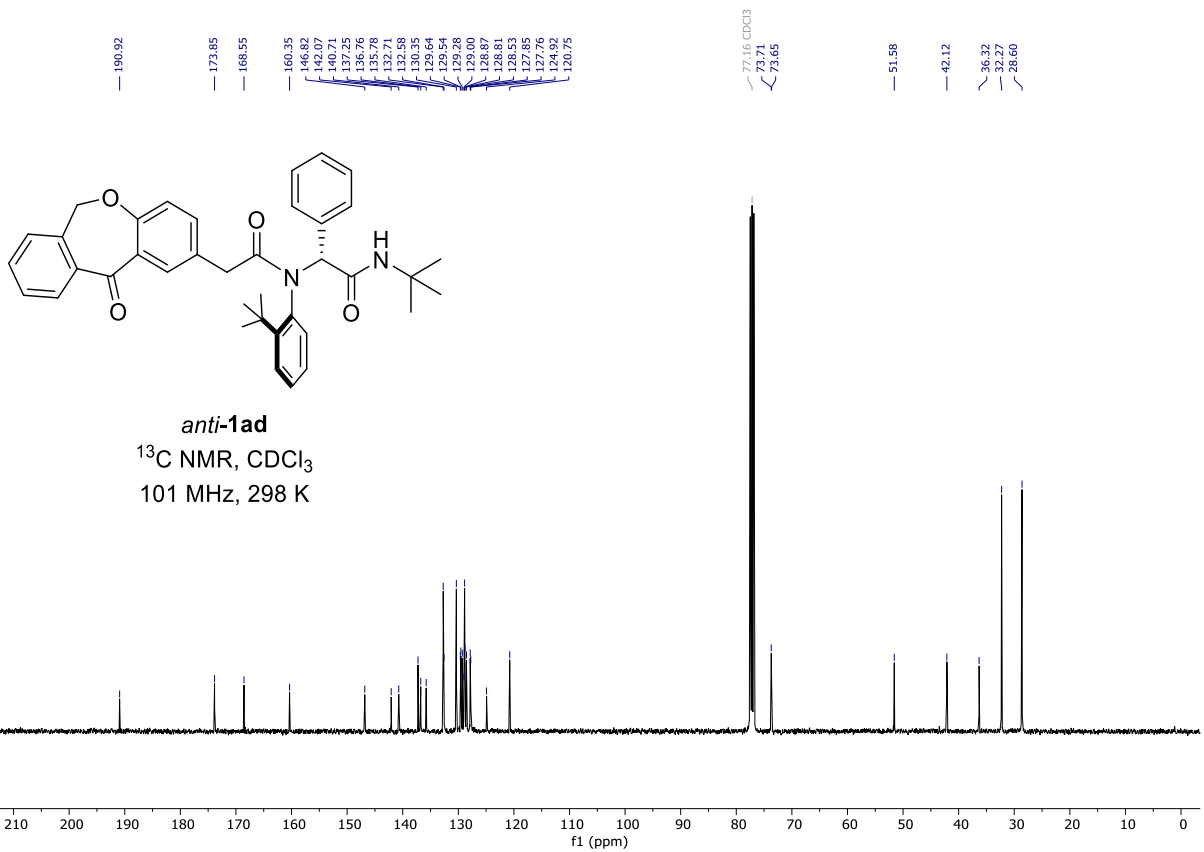

**anti-1ad**  
 $^{13}\text{C NMR}$ ,  $\text{CDCl}_3$   
 101 MHz, 298 K

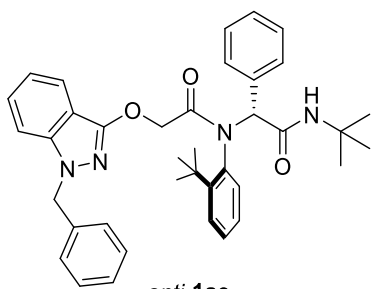

**anti-1ae**

<sup>1</sup>H NMR, CDCl<sub>3</sub>  
400 MHz, 298 K

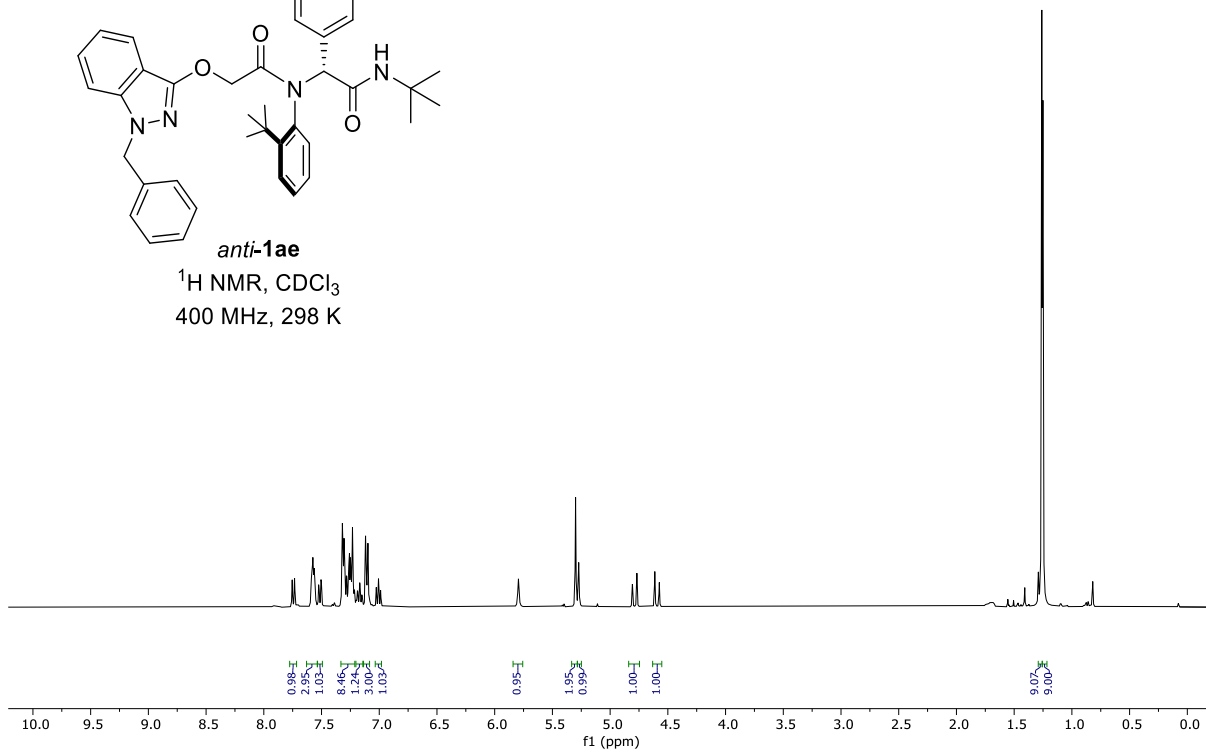

170.50, 168.00, 155.19, 147.58, 141.82, 139.22, 137.63, 136.51, 132.41, 130.98, 129.64, 129.01, 128.78, 128.64, 128.55, 127.59, 127.52, 127.34, 127.24, 120.66, 119.25, 112.85, 108.79, 77.16 CDCl<sub>3</sub>, 72.11, 68.00, 57.43, 51.64, 36.51, 33.39, 29.70

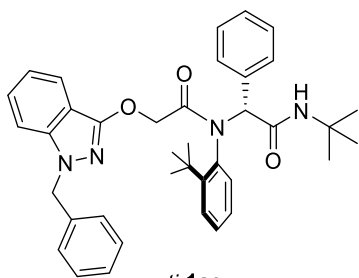

**anti-1ae**

<sup>13</sup>C NMR, CDCl<sub>3</sub>  
101 MHz, 298 K

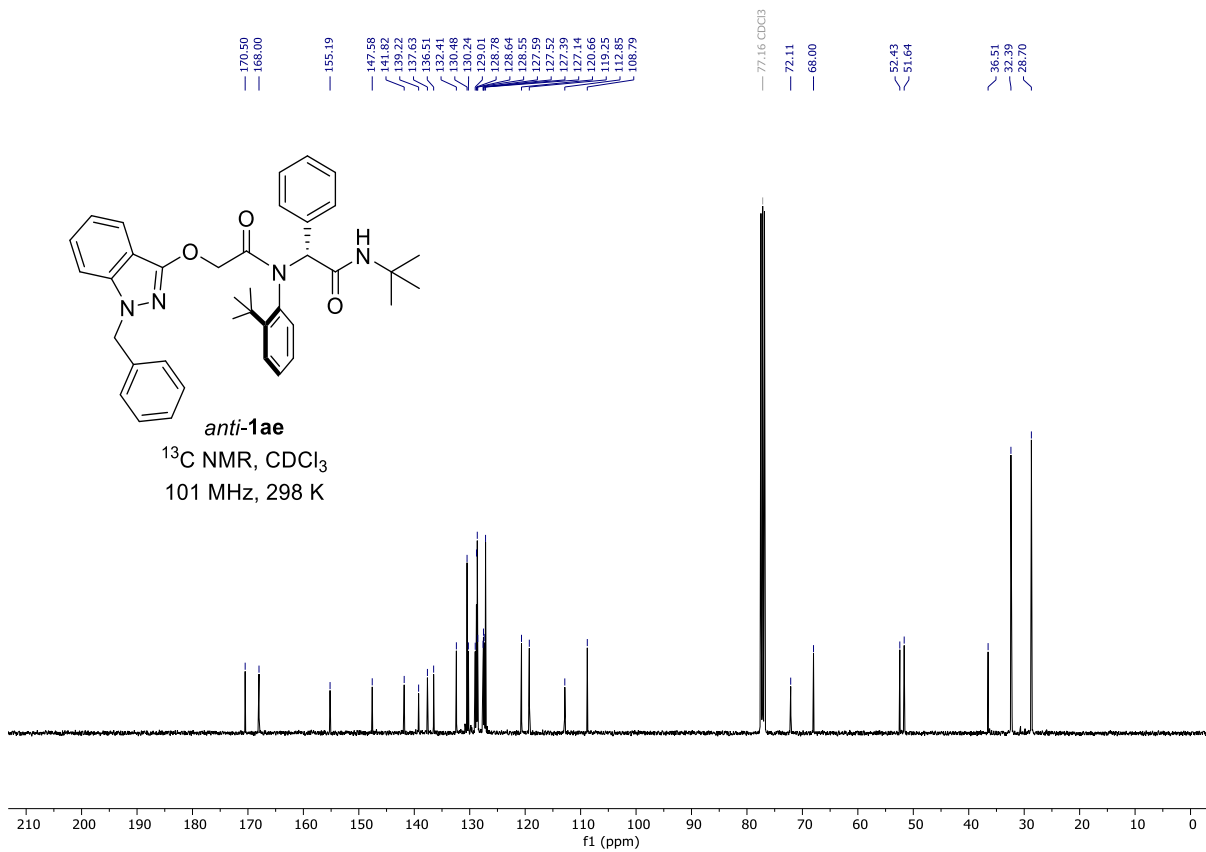

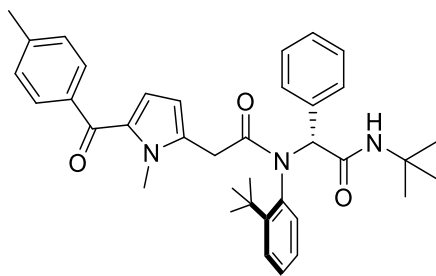

**anti-1af**

<sup>1</sup>H NMR, CDCl<sub>3</sub>  
400 MHz, 298 K

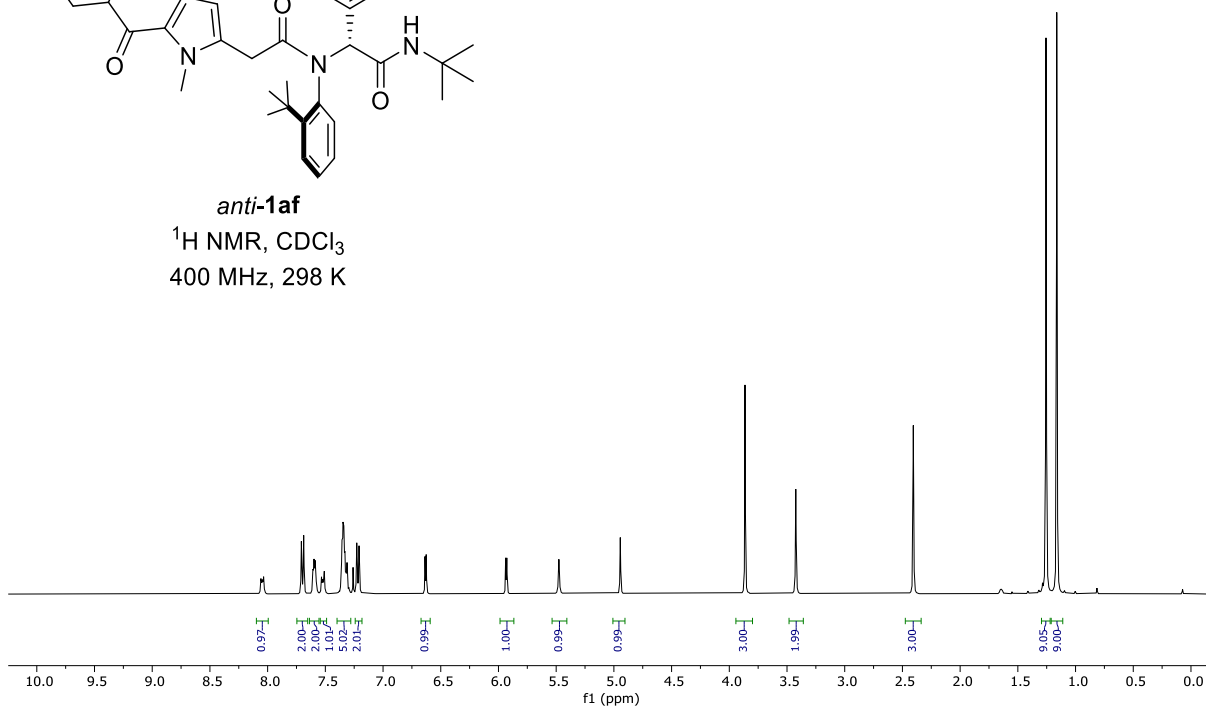

185.75  
172.05  
168.42  
146.80  
144.80  
141.56  
137.85  
136.72  
136.14  
132.10  
131.29  
129.62  
129.63  
129.52  
129.11  
128.91  
128.88  
128.68  
128.32  
122.35  
109.21  
77.16 CDCl<sub>3</sub>  
74.90  
51.75  
36.21  
35.36  
33.56  
32.23  
28.61  
21.64

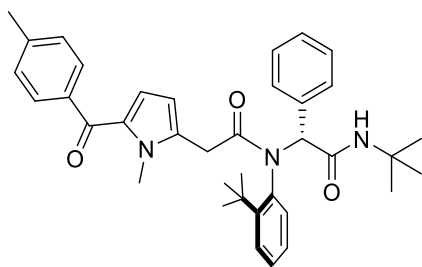

**anti-1af**

<sup>13</sup>C NMR, CDCl<sub>3</sub>  
101 MHz, 298 K

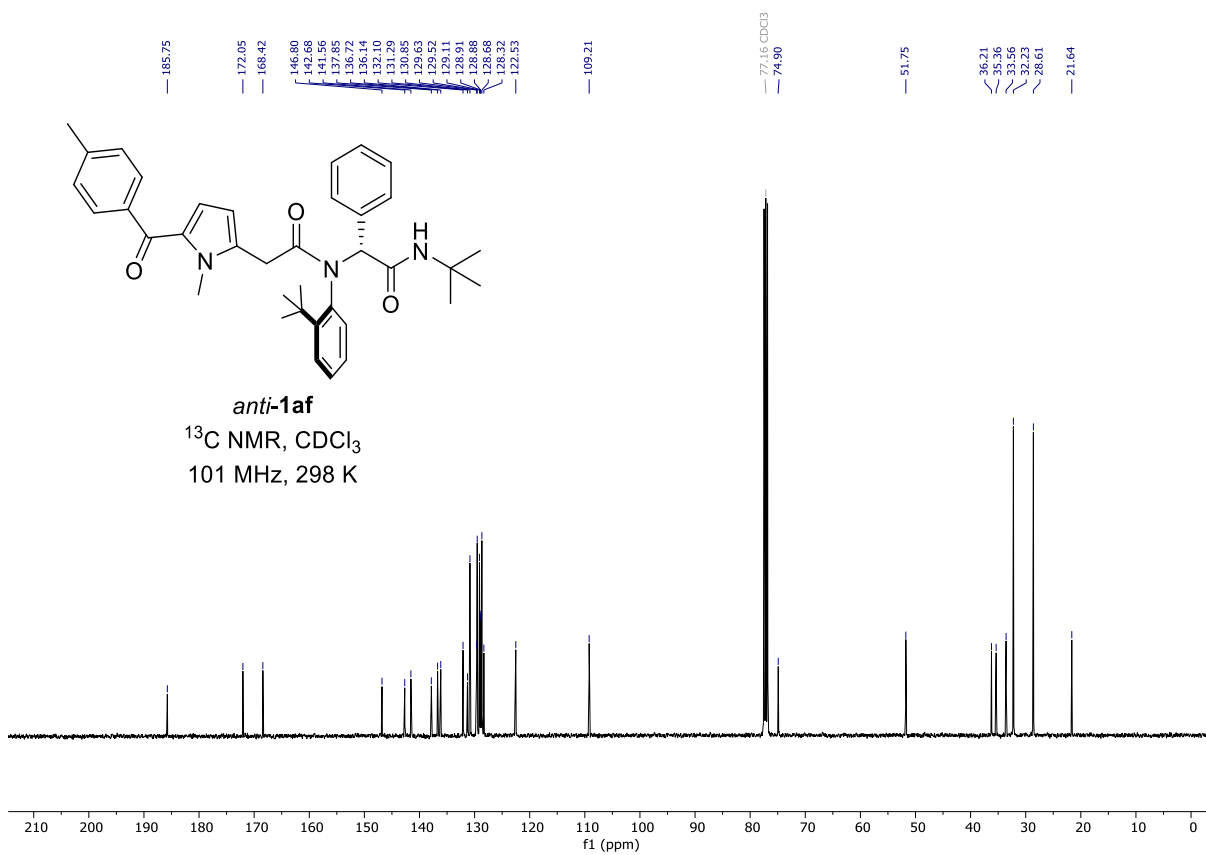

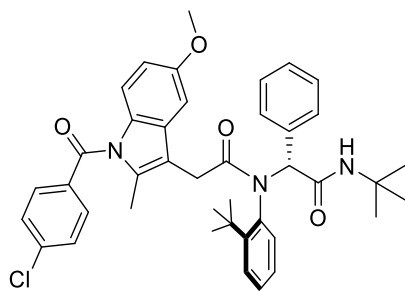

**anti-1ag**  
<sup>1</sup>H NMR, CDCl<sub>3</sub>  
 400 MHz, 298 K

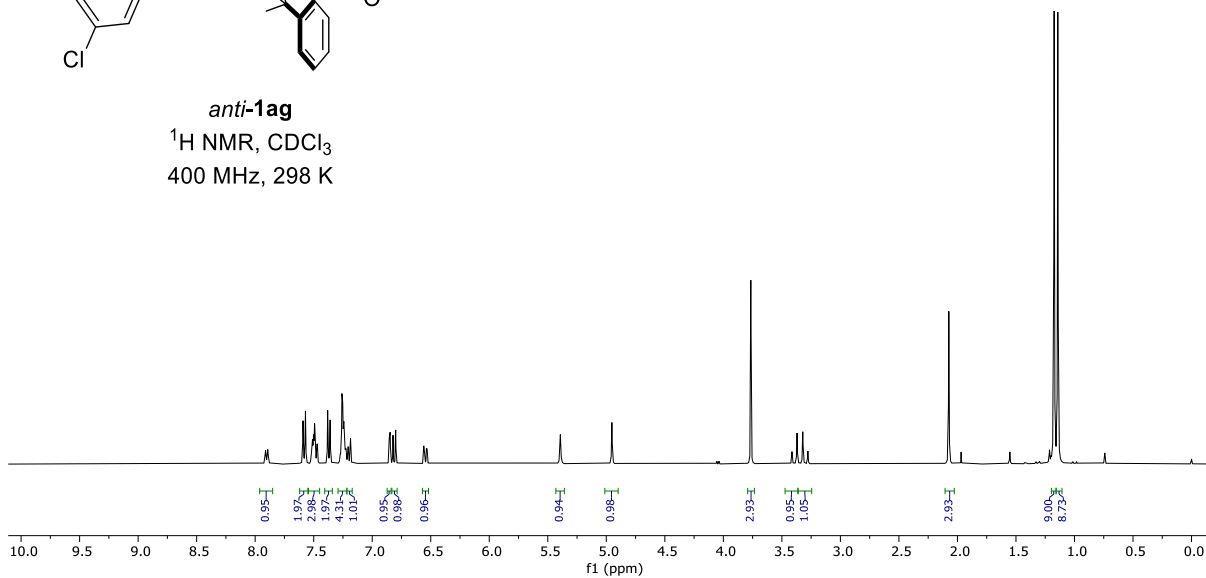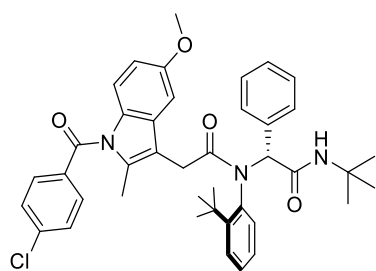

**anti-1ag**  
<sup>13</sup>C NMR, CDCl<sub>3</sub>  
 101 MHz, 298 K

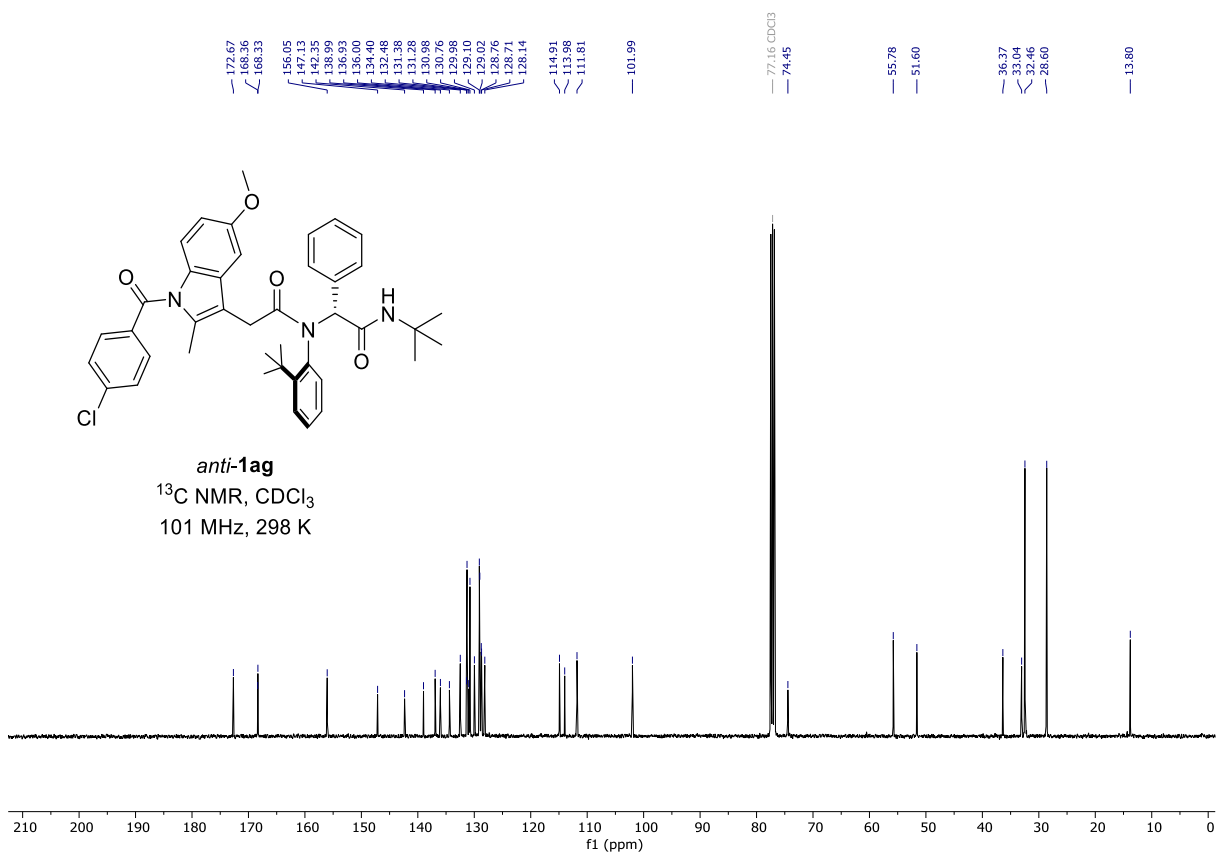



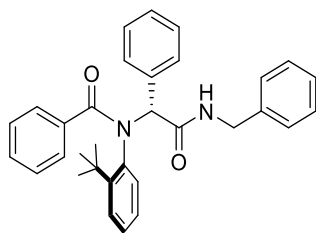

**anti-1ah**  
<sup>1</sup>H NMR, CDCl<sub>3</sub>  
 300 MHz, 298 K

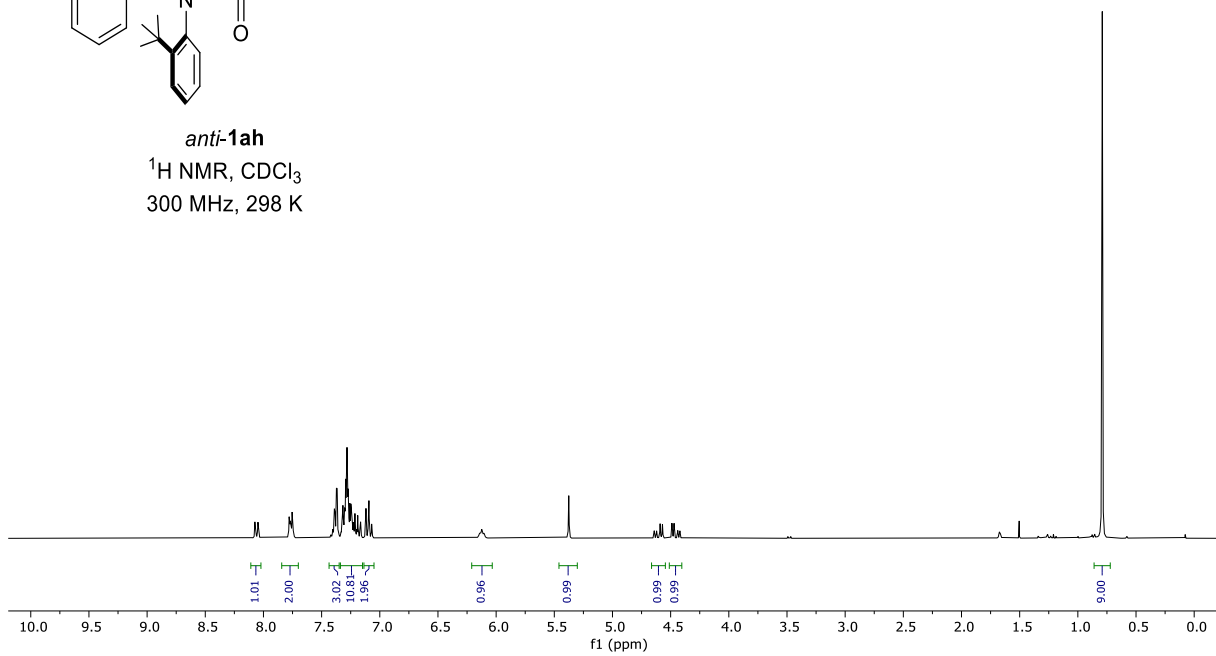

170.71  
 169.11  
 146.70  
 145.74  
 138.19  
 136.34  
 135.81  
 132.17  
 131.40  
 130.65  
 129.78  
 129.74  
 129.28  
 129.22  
 128.73  
 128.05  
 127.63  
 127.39  
 127.20

77.16 CDCl<sub>3</sub>  
 75.12

44.07  
 36.16  
 32.19

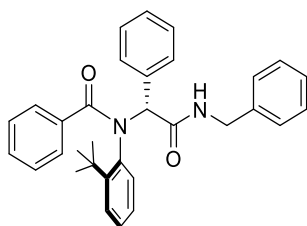

**anti-1ah**  
<sup>13</sup>C NMR, CDCl<sub>3</sub>  
 75 MHz, 298 K

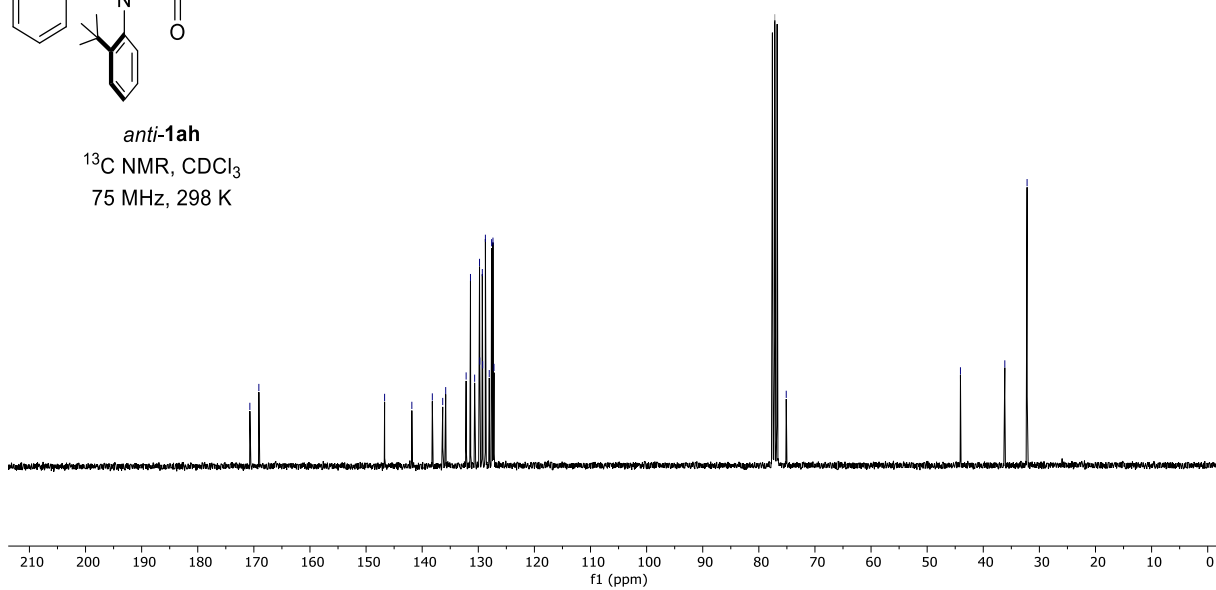

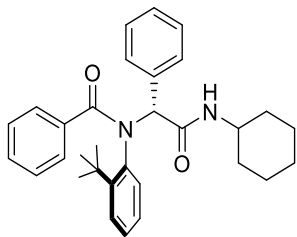

**anti-1ai**

<sup>1</sup>H NMR, CDCl<sub>3</sub>  
300 MHz, 298 K

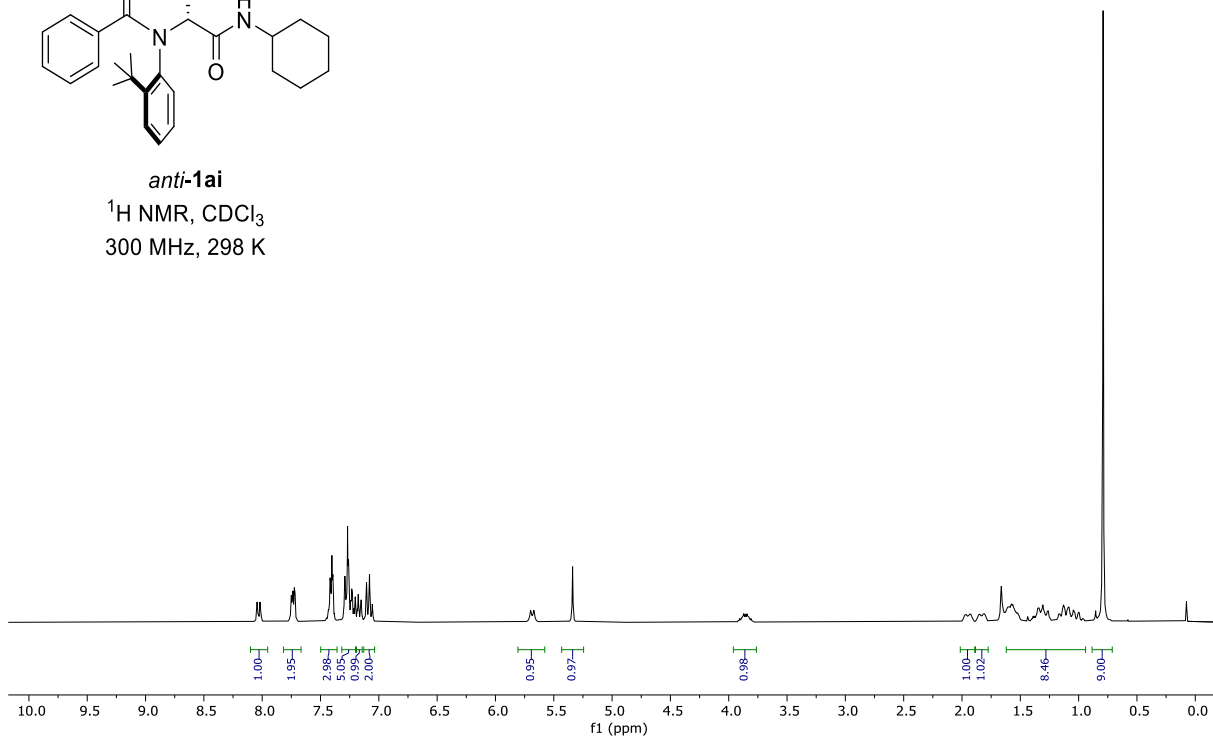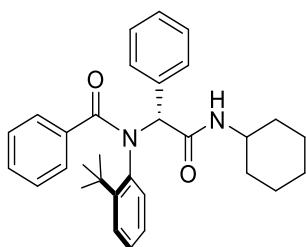

**anti-1ai**

<sup>13</sup>C NMR, CDCl<sub>3</sub>  
75 MHz, 298 K

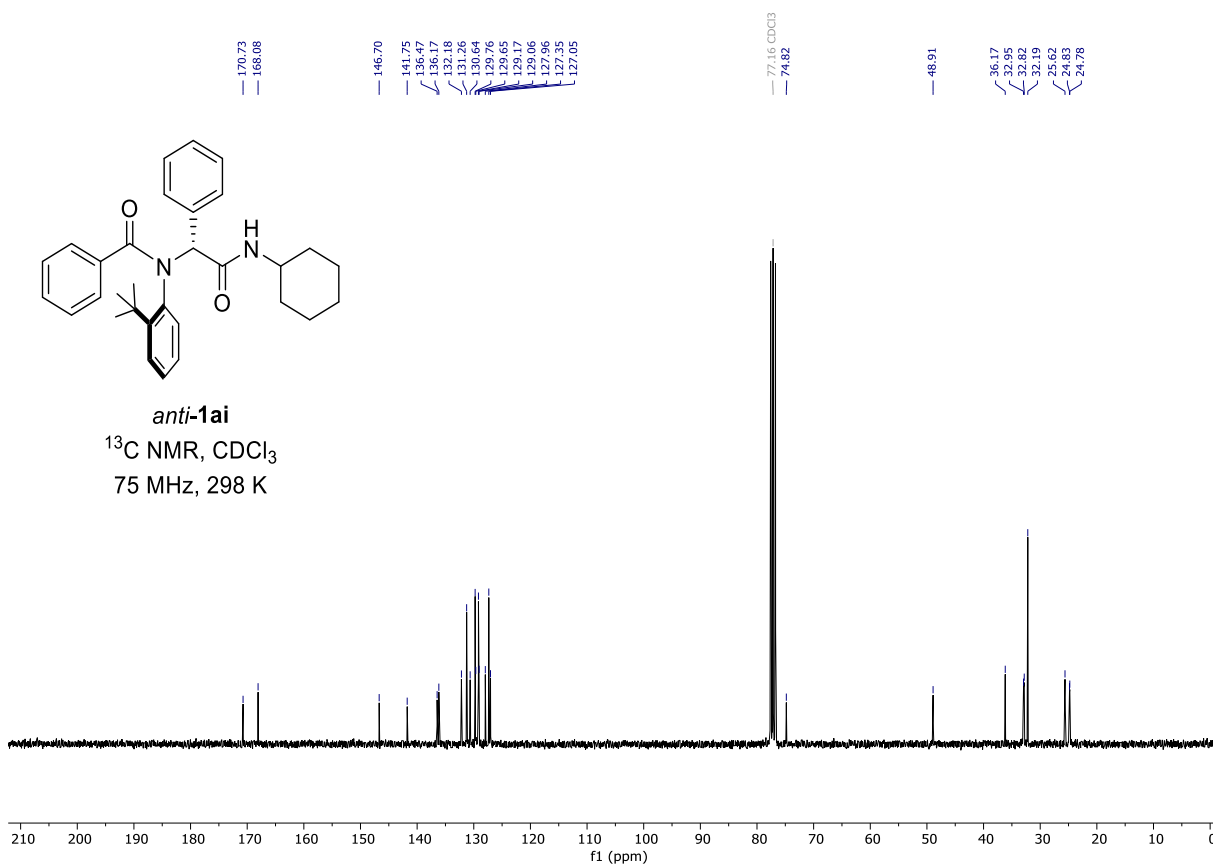

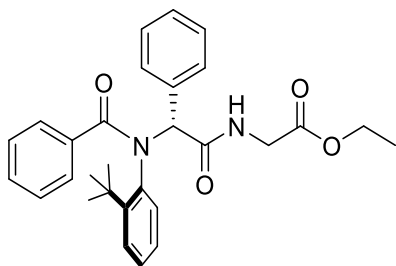

**anti-1aj**

<sup>1</sup>H NMR, CDCl<sub>3</sub>  
300 MHz, 298 K

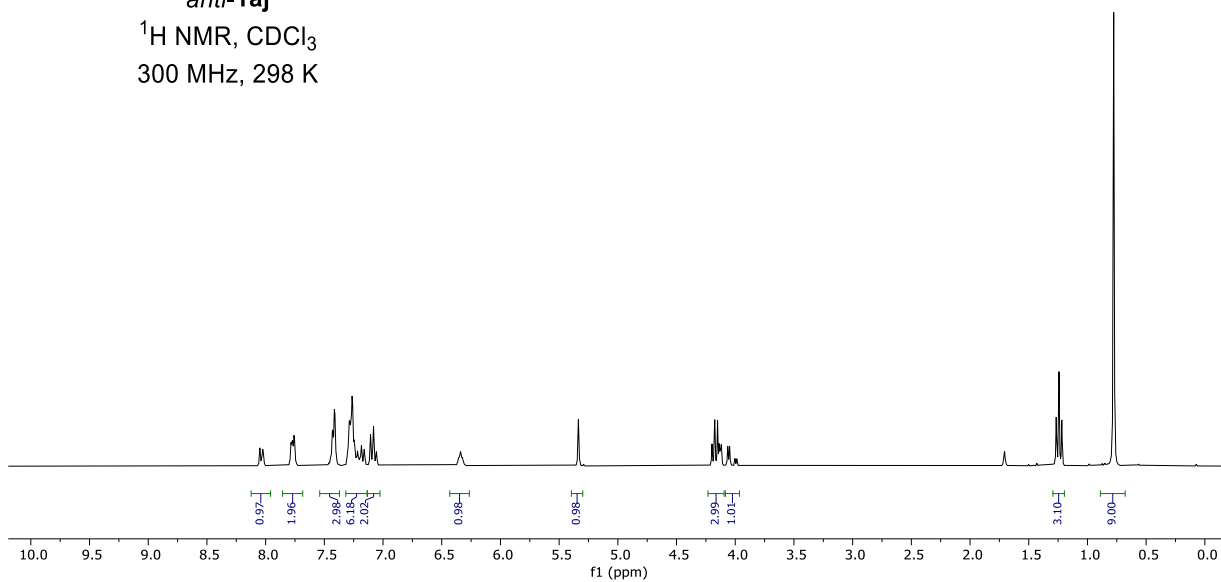

170.61  
169.71  
169.31  
146.65  
136.88  
136.78  
135.50  
132.05  
131.44  
130.65  
129.80  
129.78  
129.33  
129.26  
128.08  
127.37  
127.28  
77.16 CDCl<sub>3</sub>  
75.05  
61.57  
41.97  
36.14  
32.17  
14.22

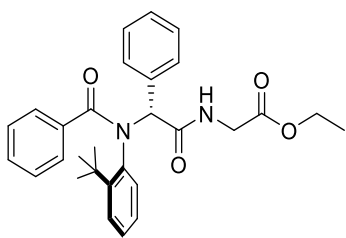

**anti-1aj**

<sup>13</sup>C NMR, CDCl<sub>3</sub>  
75 MHz, 298 K

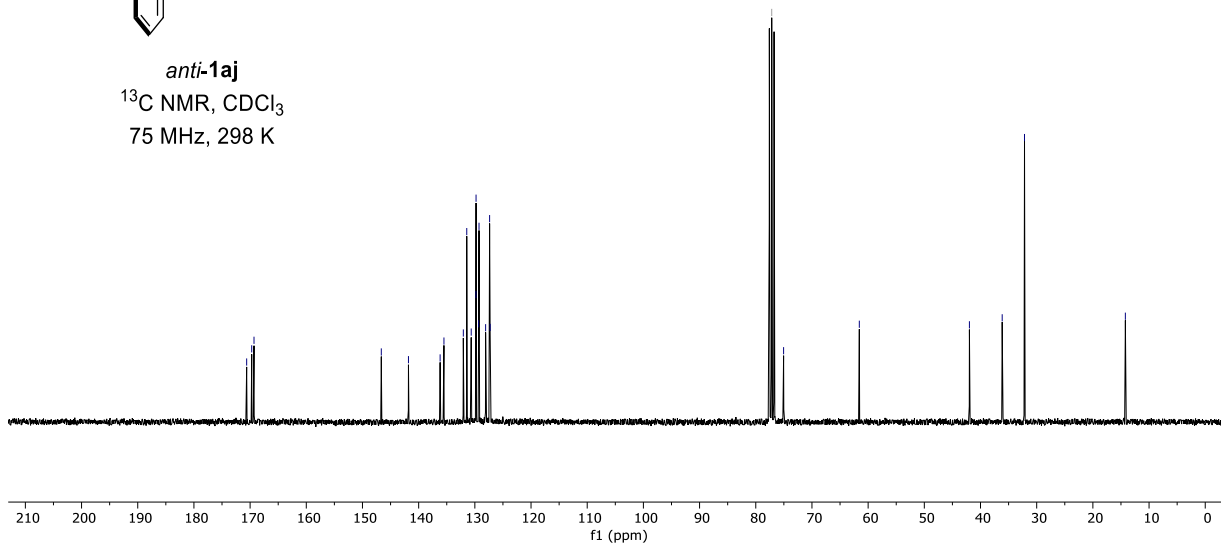

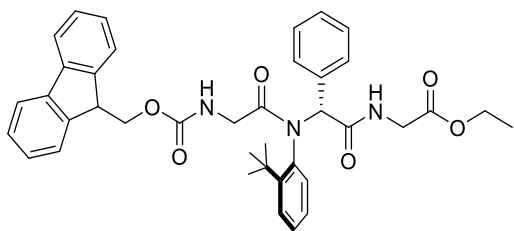

**anti-1ak**  
 $^1\text{H NMR}$ ,  $\text{CDCl}_3$   
 300 MHz, 298 K

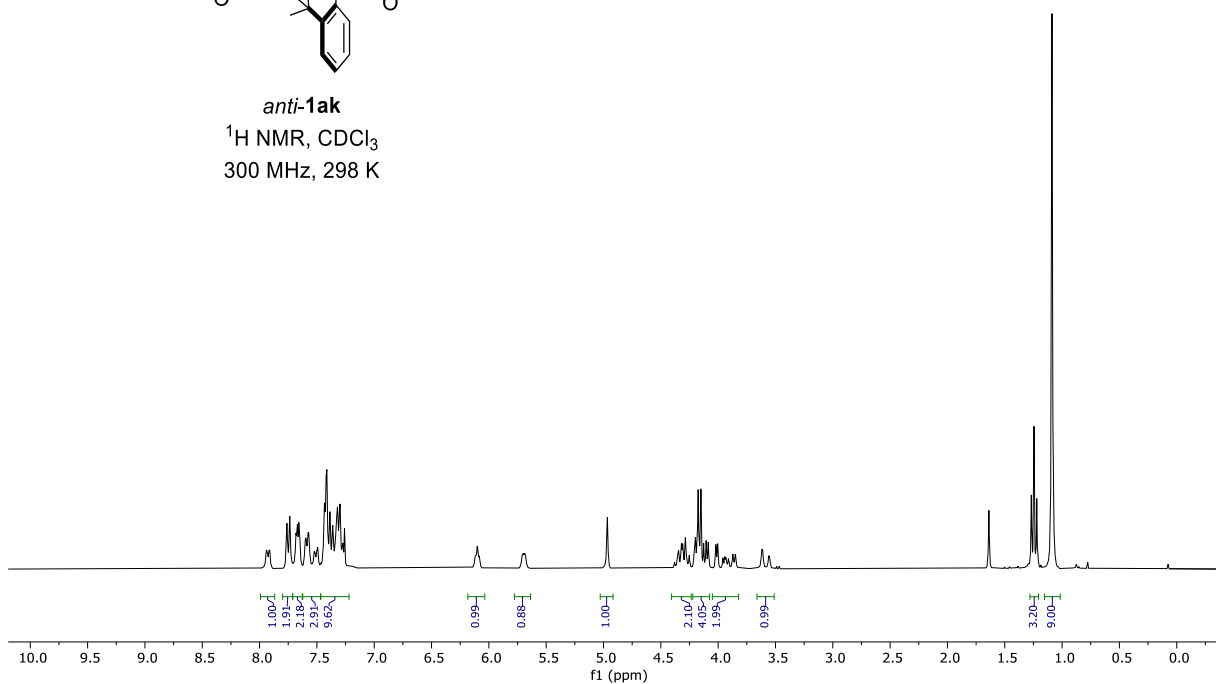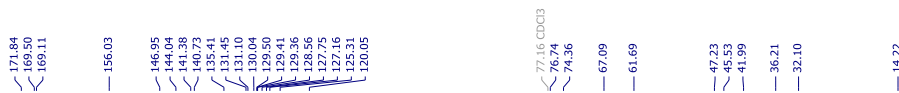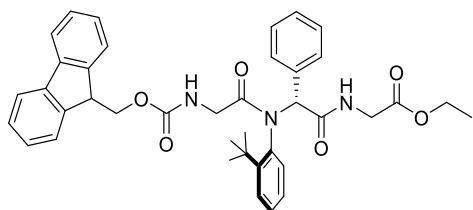

**anti-1ak**  
 $^{13}\text{C NMR}$ ,  $\text{CDCl}_3$   
 75 MHz, 298 K

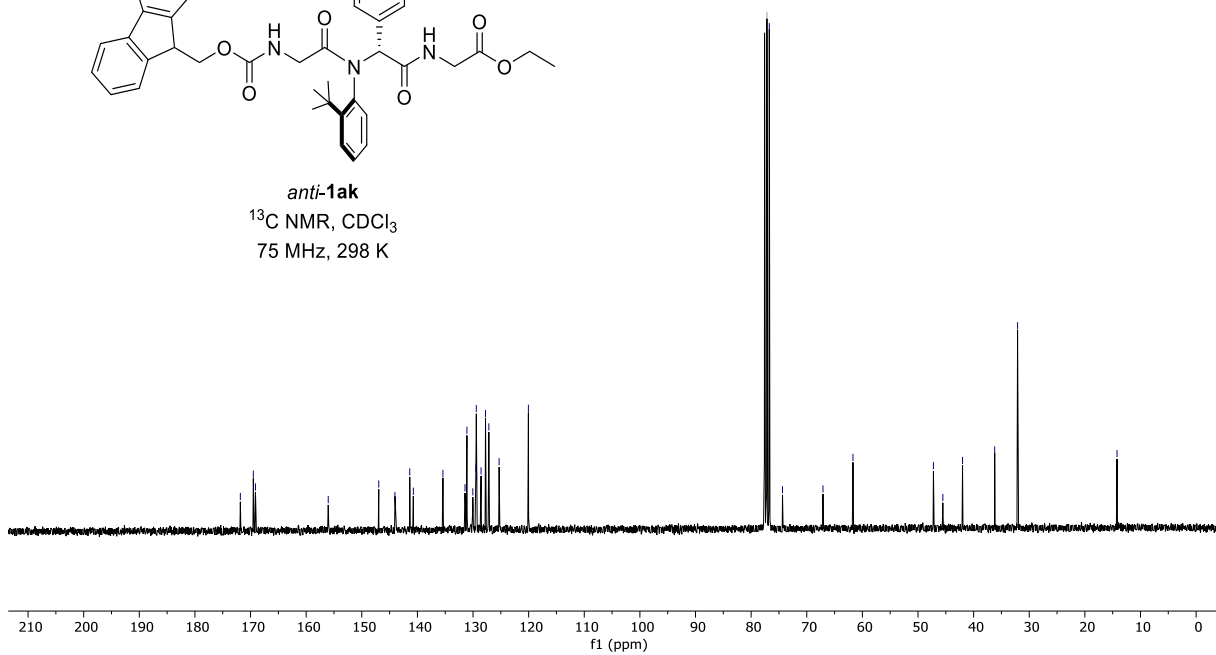

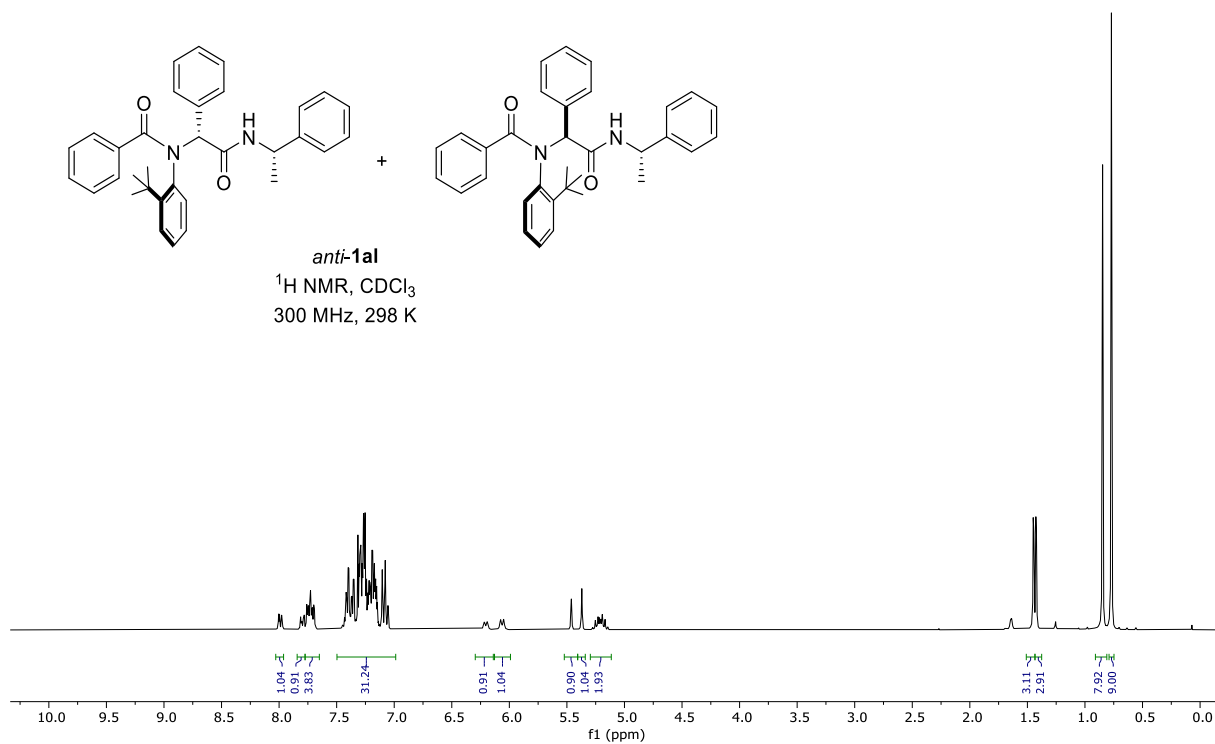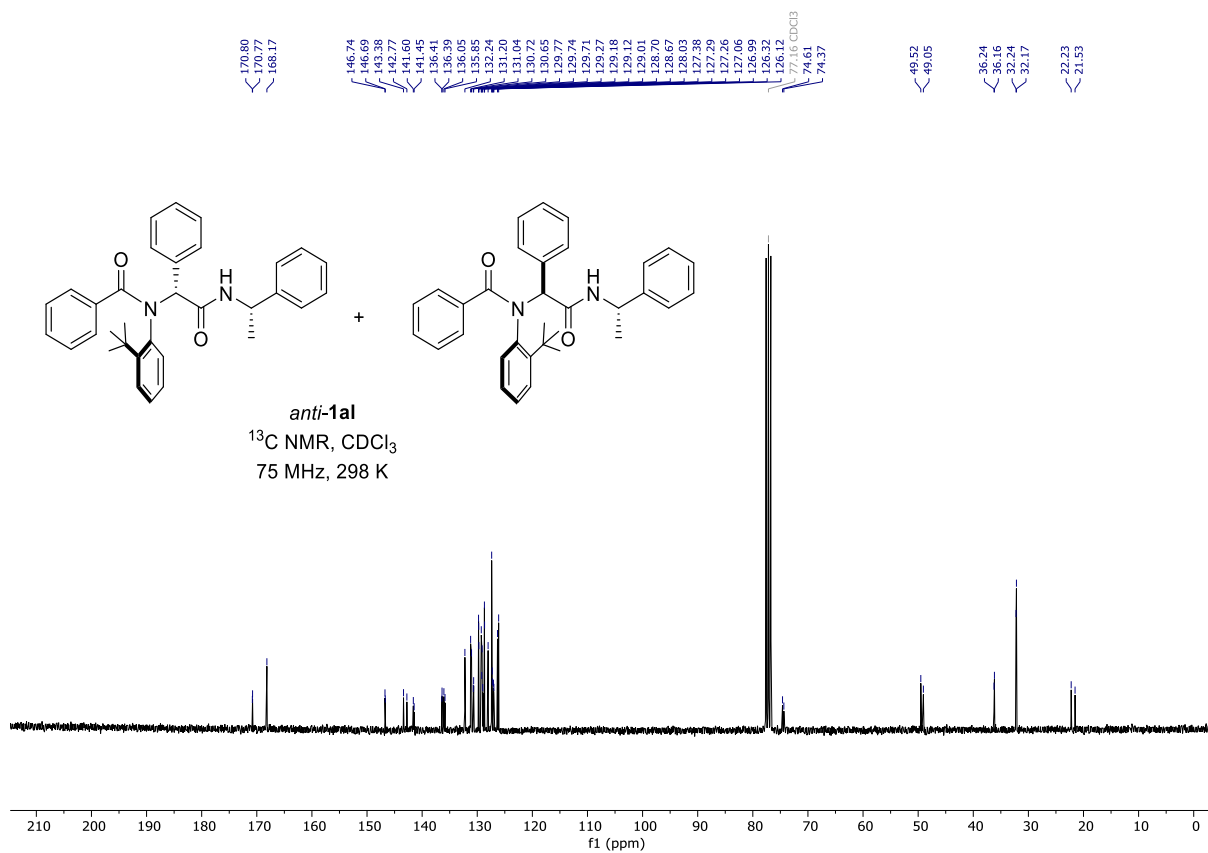

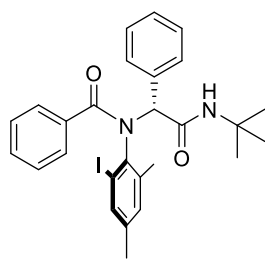

**anti-1am**

$^1\text{H}$  NMR,  $\text{CDCl}_3$   
300 MHz, 298 K

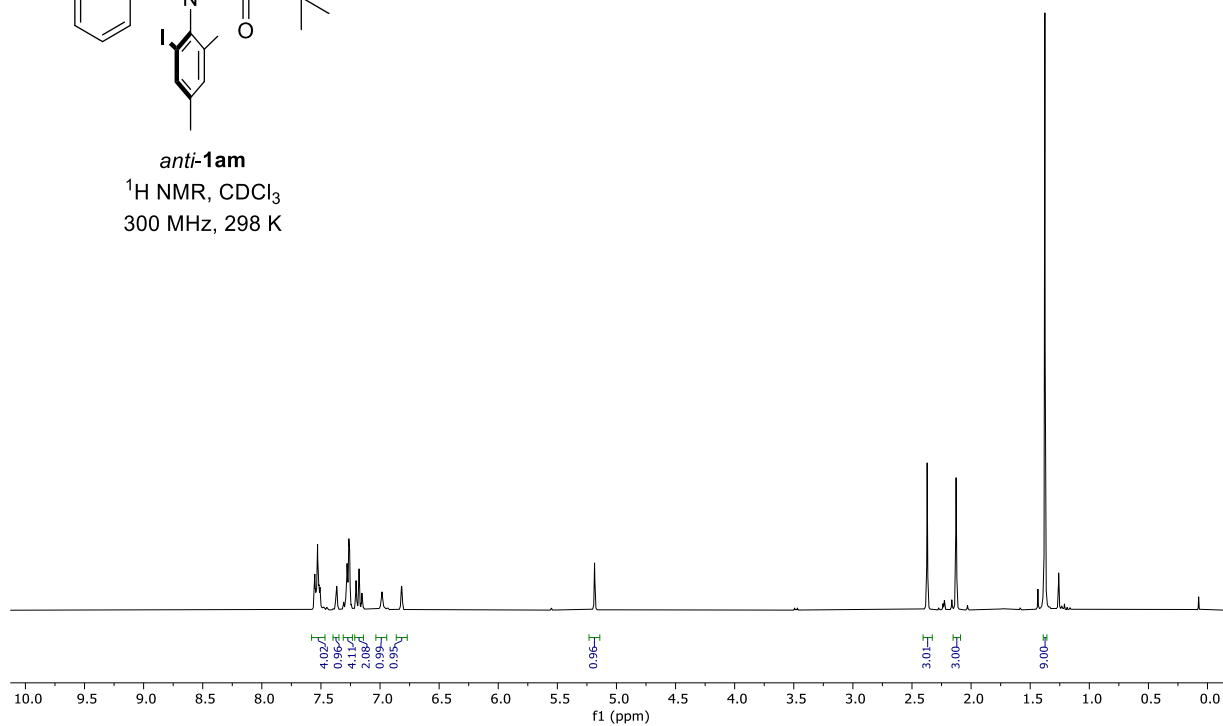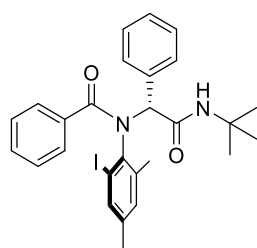

**anti-1am**

$^{13}\text{C}$  NMR,  $\text{CDCl}_3$   
75 MHz, 298 K

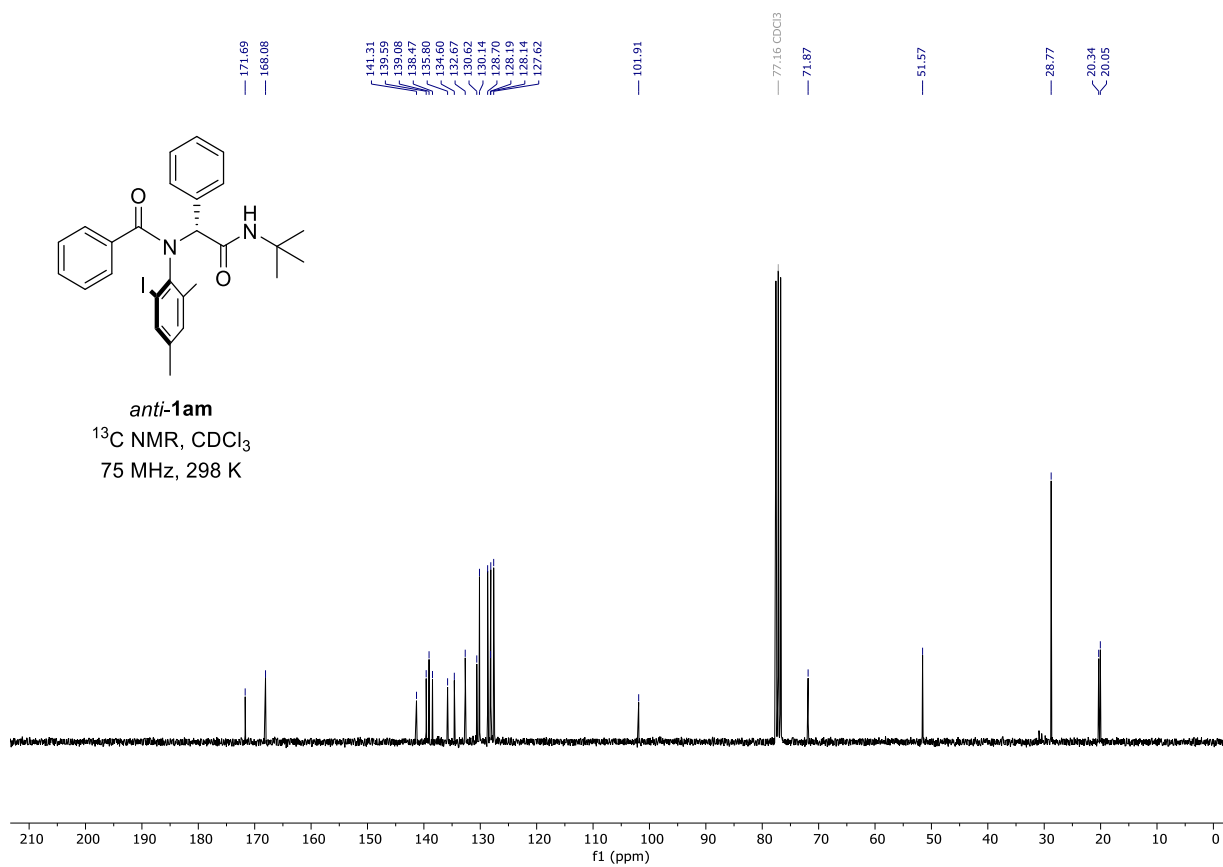

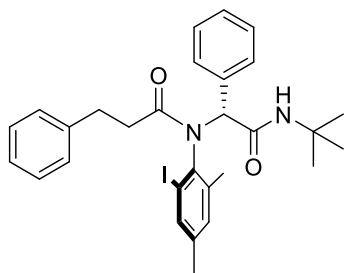

*anti*-1an

$^1\text{H}$  NMR,  $\text{CDCl}_3$   
400 MHz, 298 K

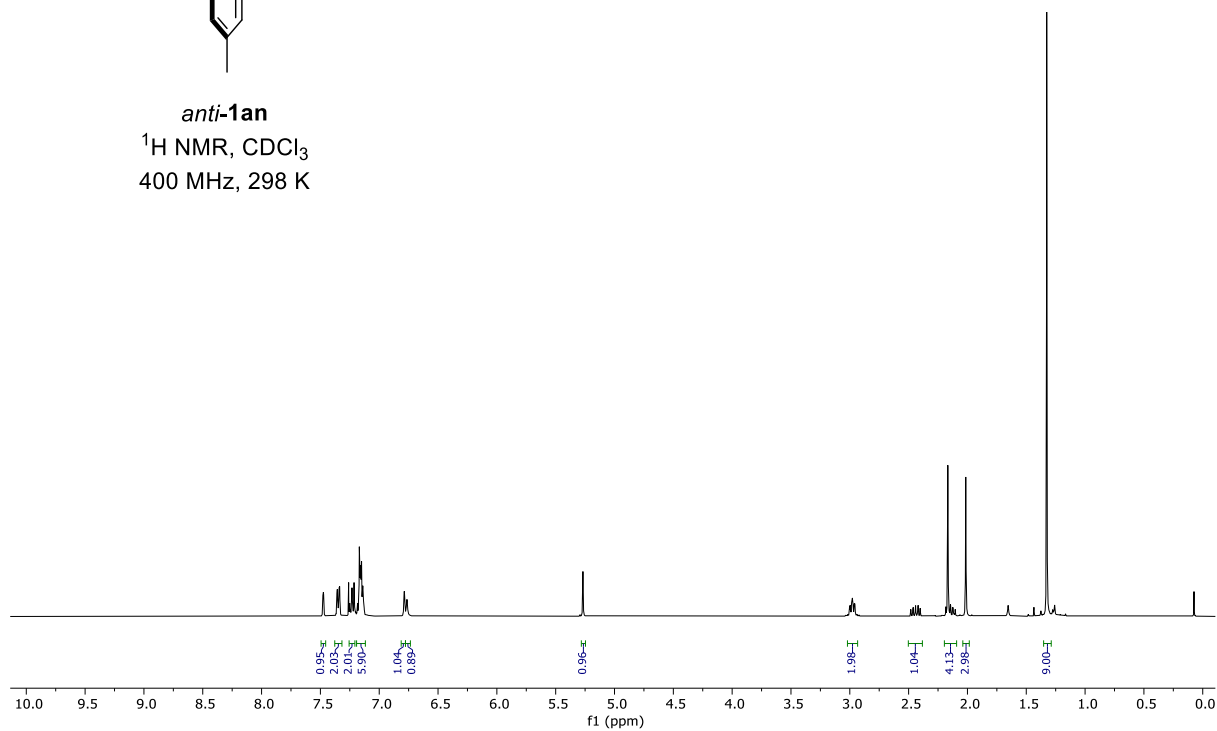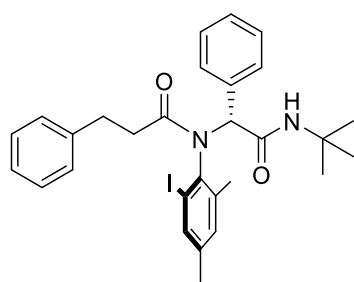

*anti*-1an

$^{13}\text{C}$  NMR,  $\text{CDCl}_3$   
75 MHz, 298 K

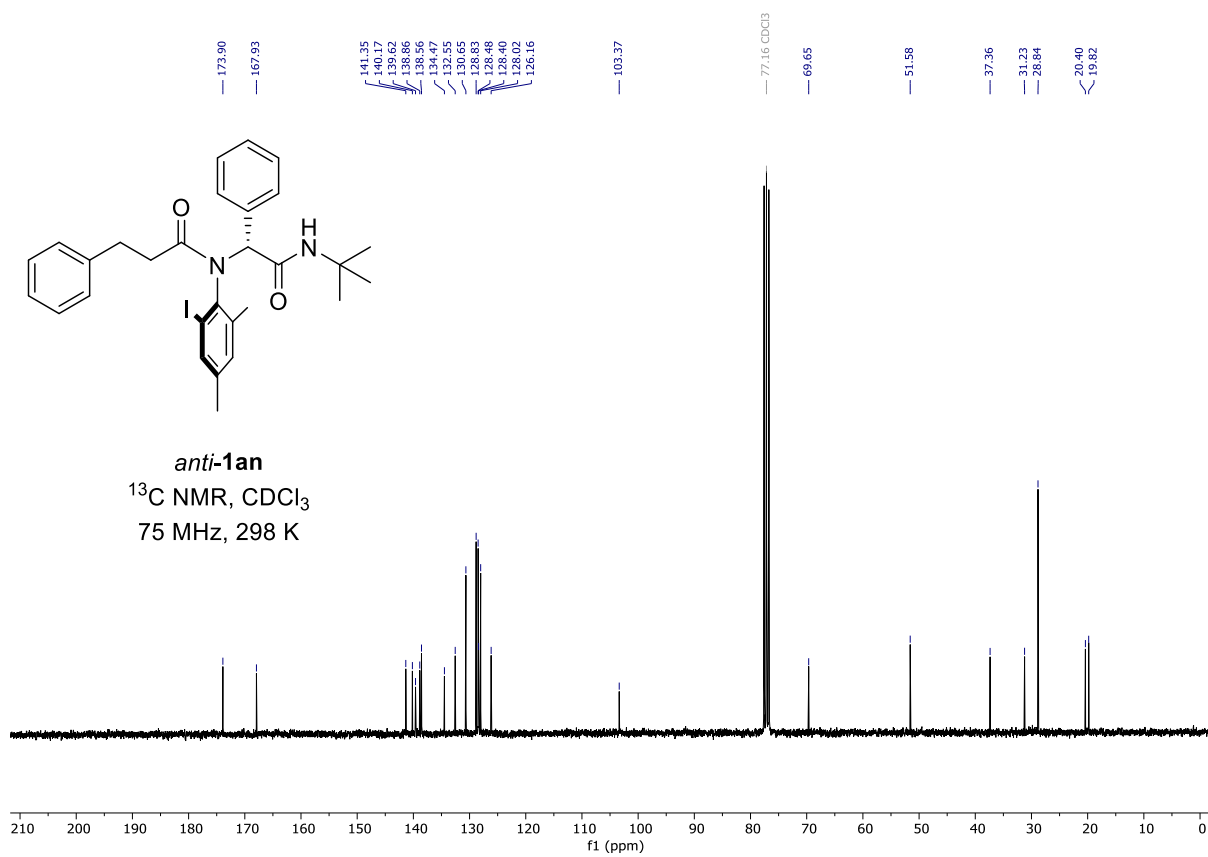

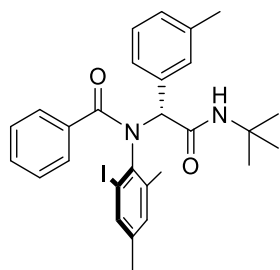

**anti-1ao**  
 $^1\text{H NMR}$ ,  $\text{CDCl}_3$   
 400 MHz, 298 K

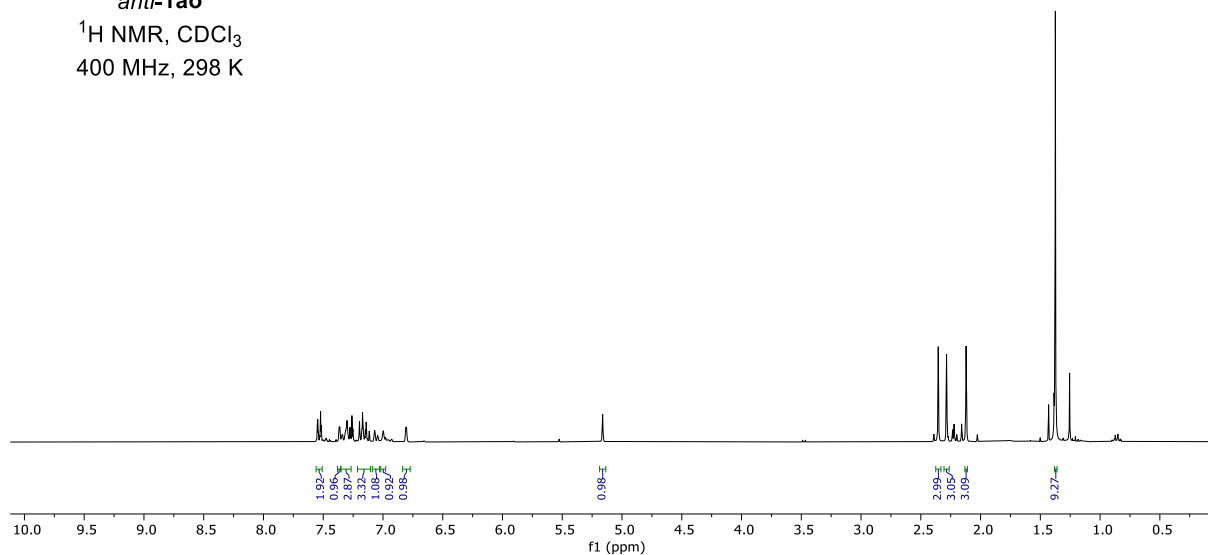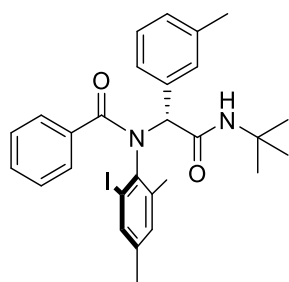

**anti-1ao**  
 $^{13}\text{C NMR}$ ,  $\text{CDCl}_3$   
 75 MHz, 298 K

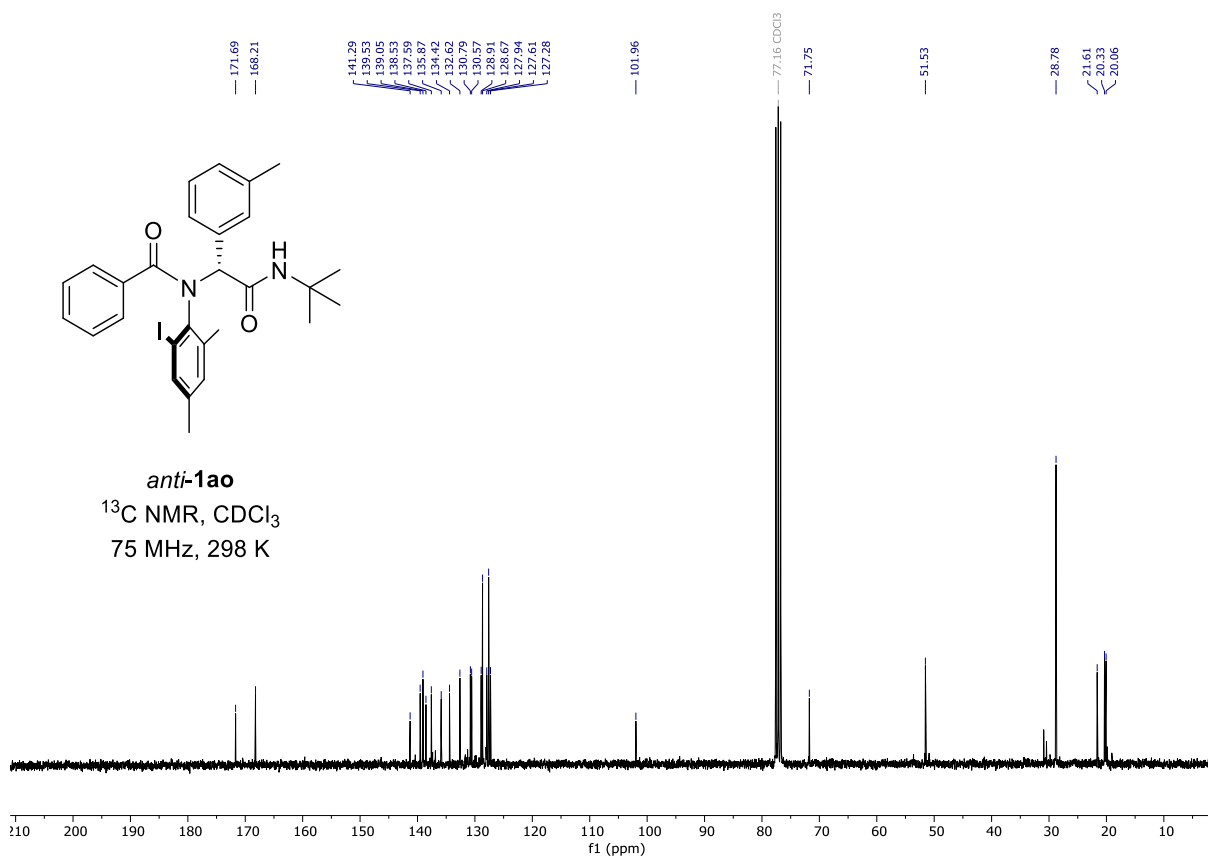



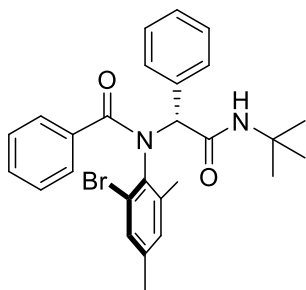

*anti-1ap*

$^1\text{H NMR}$ ,  $\text{CDCl}_3$   
400 MHz, 298 K

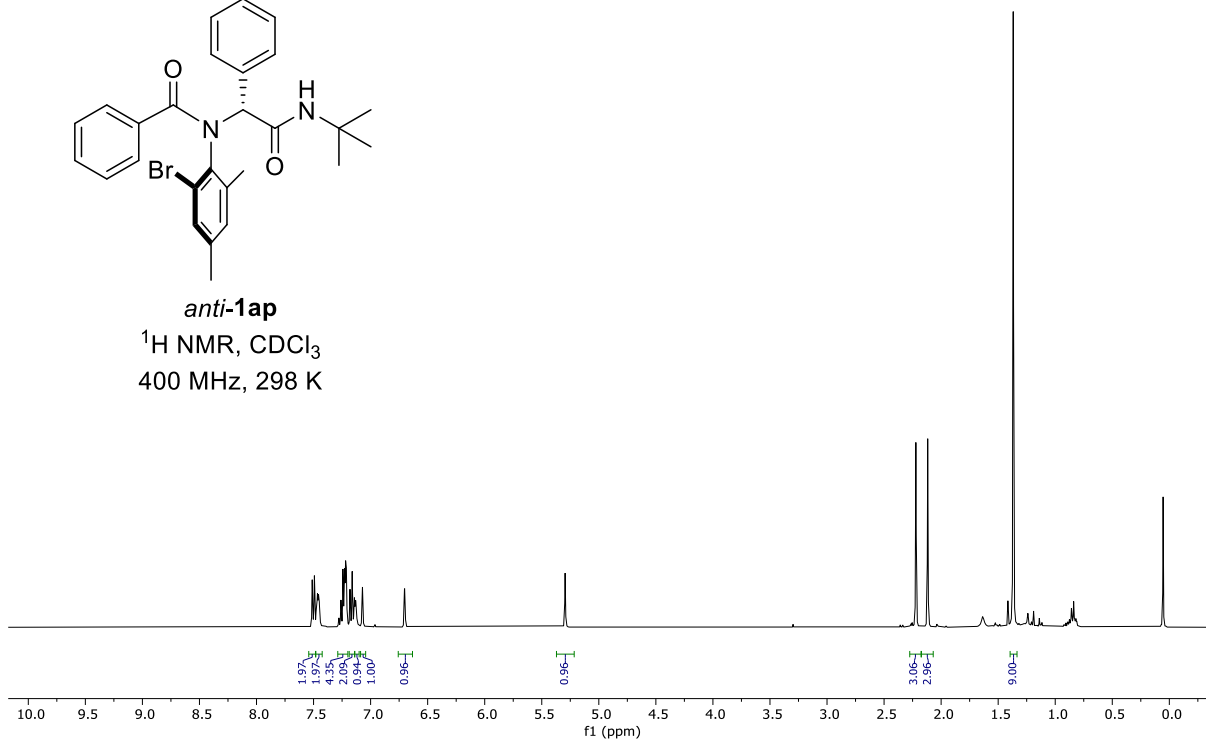

172.12

168.40

139.56

138.04

138.02

135.85

134.45

132.05

131.55

130.62

129.57

128.14

128.08

127.75

124.68

77.16  $\text{CDCl}_3$

71.32

51.50

28.76

20.65

15.99

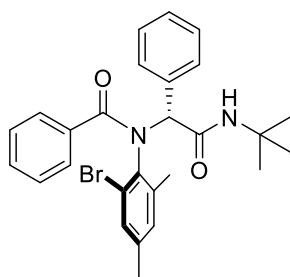

*anti-1ap*

$^{13}\text{C NMR}$ ,  $\text{CDCl}_3$   
101 MHz, 298 K

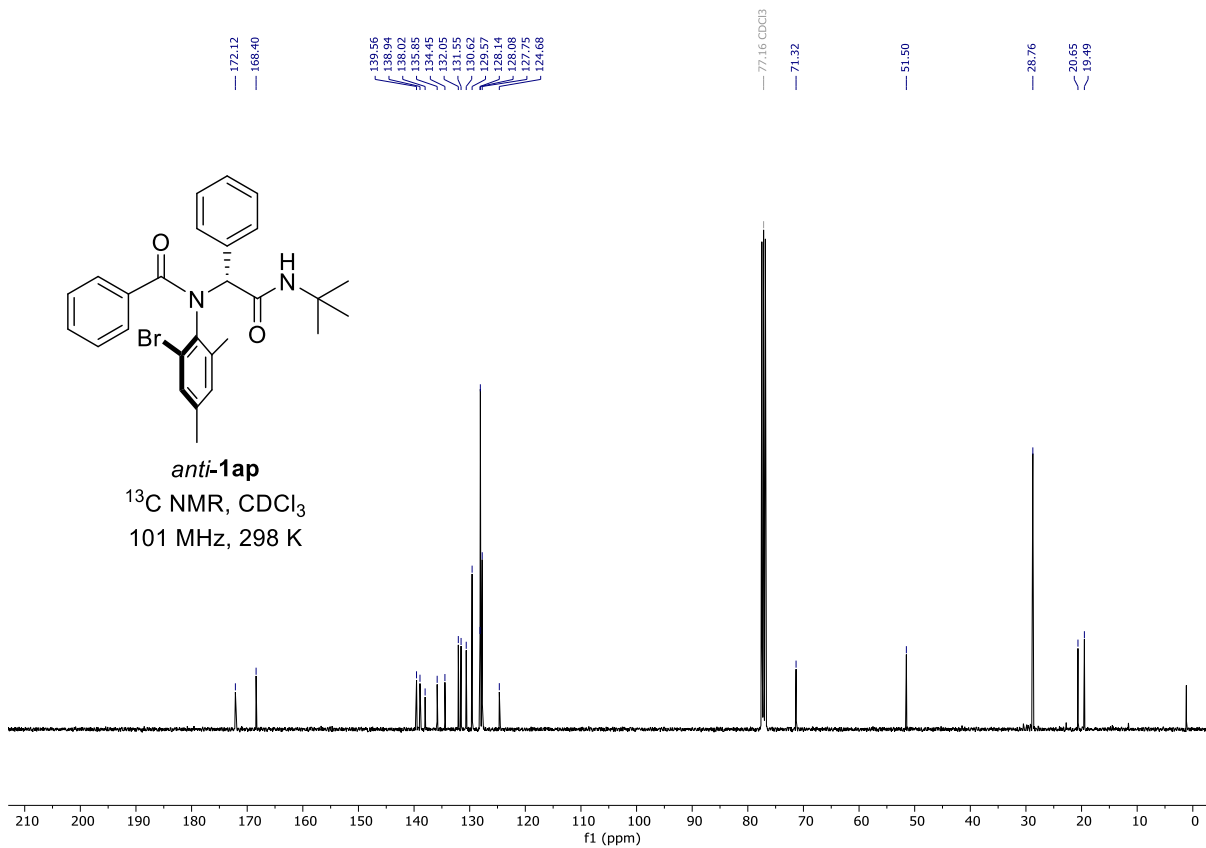

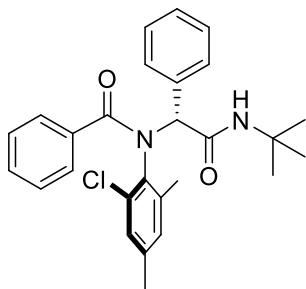

**anti-1aq**

$^1\text{H}$  NMR,  $\text{CDCl}_3$

400 MHz, 298 K

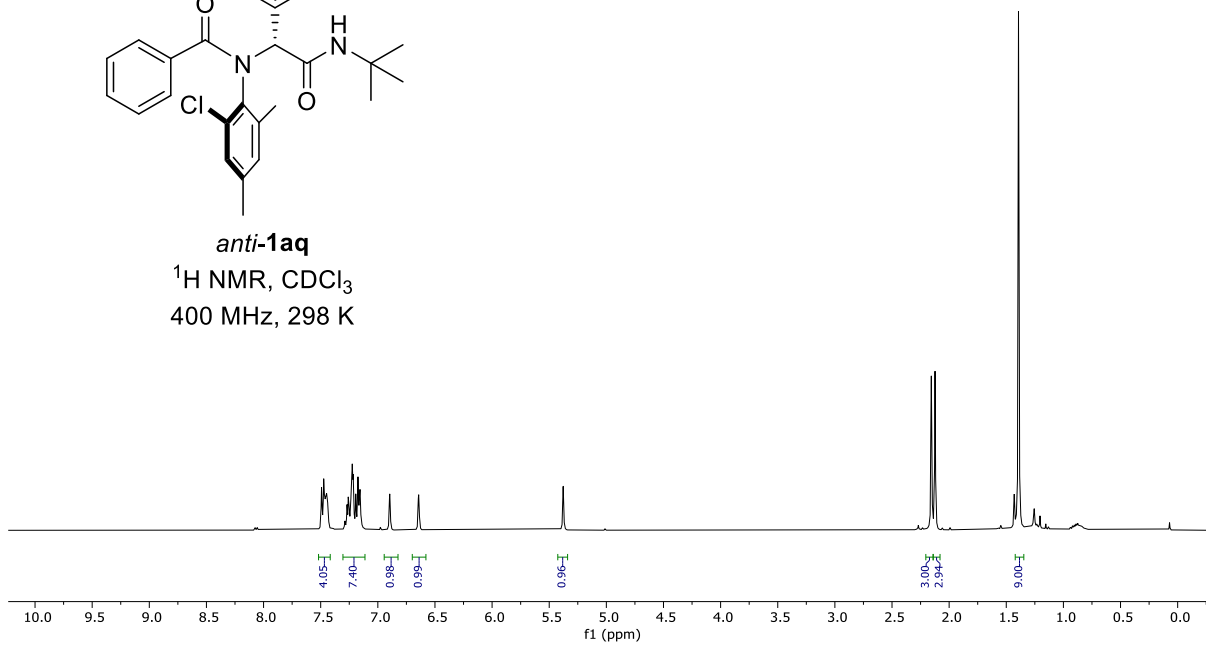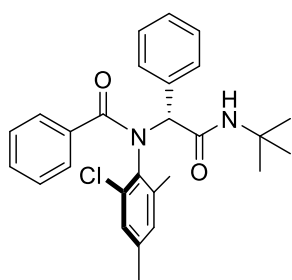

**anti-1aq**

$^{13}\text{C}$  NMR,  $\text{CDCl}_3$

101 MHz, 298 K

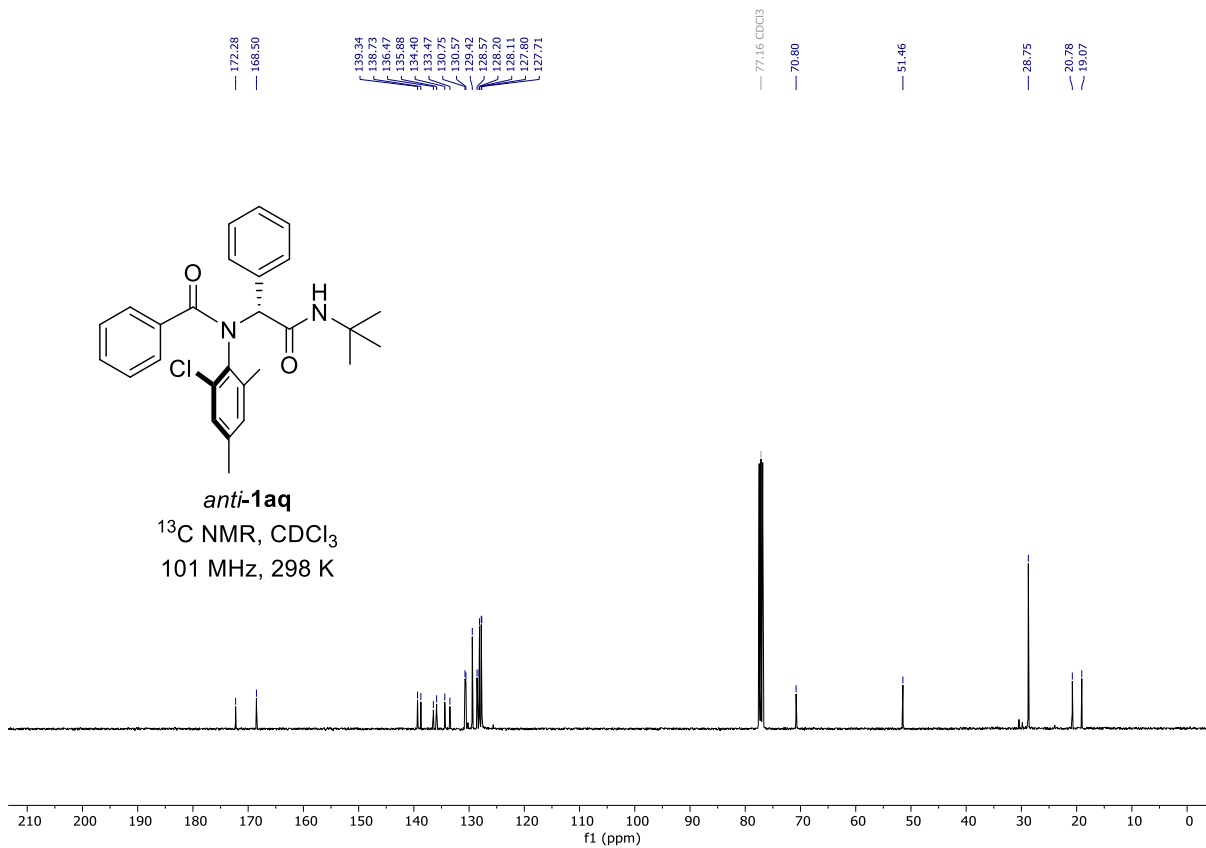

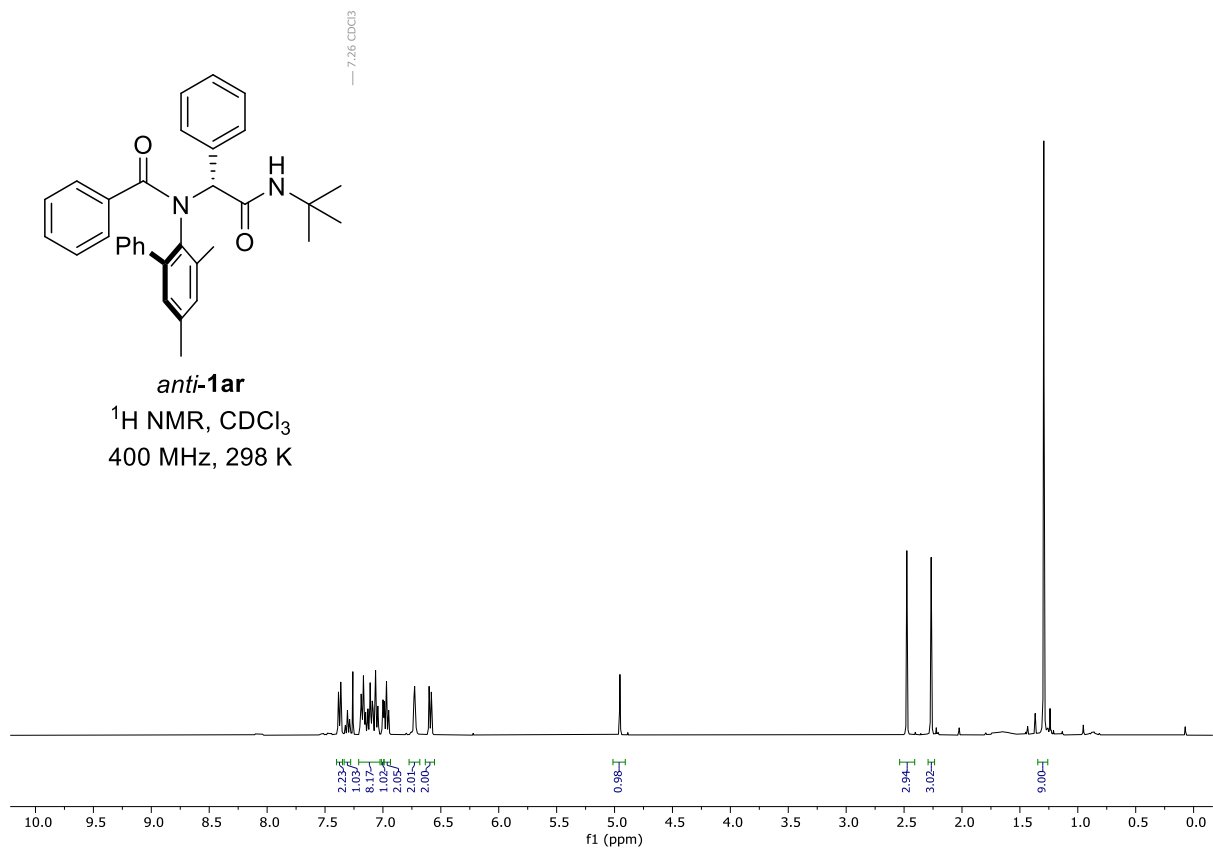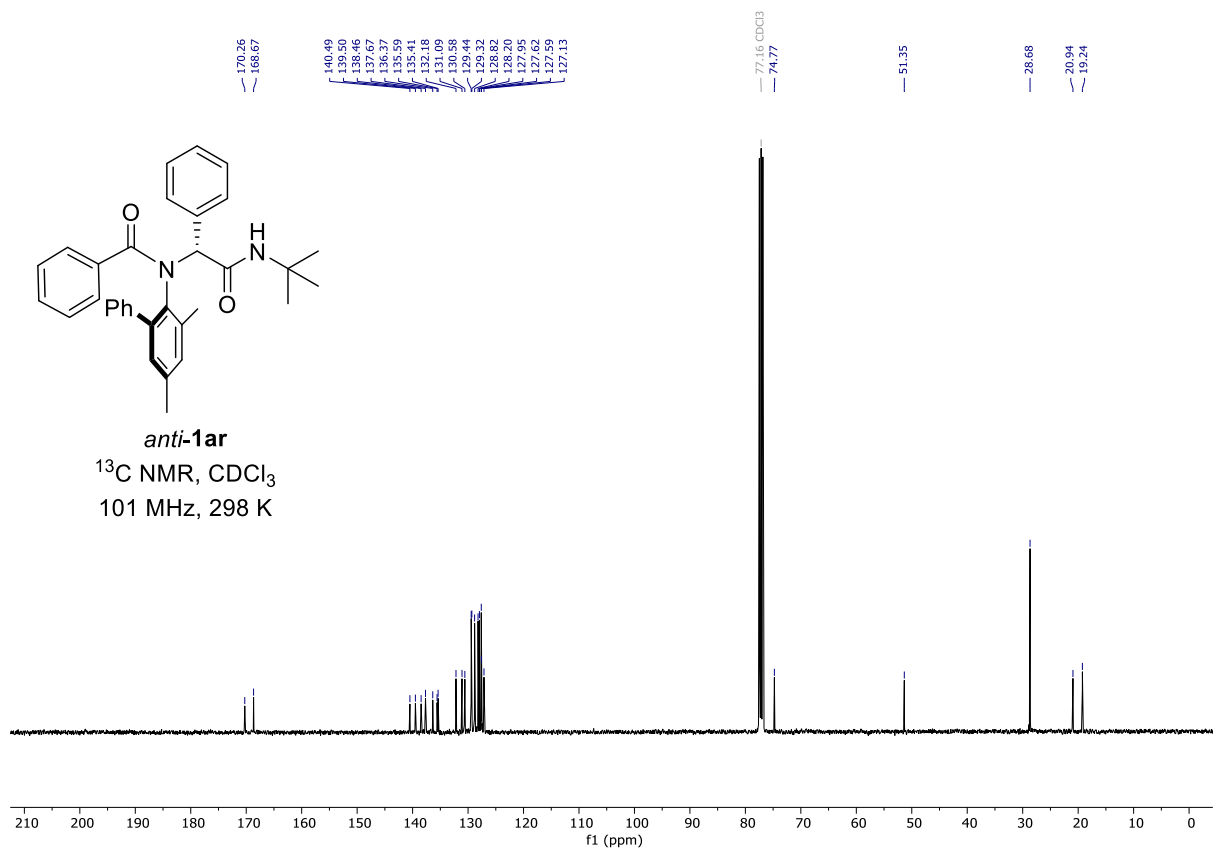

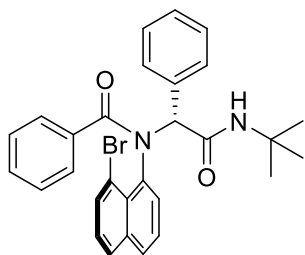

**anti-1as**

<sup>1</sup>H NMR, CDCl<sub>3</sub>

400 MHz, 298 K

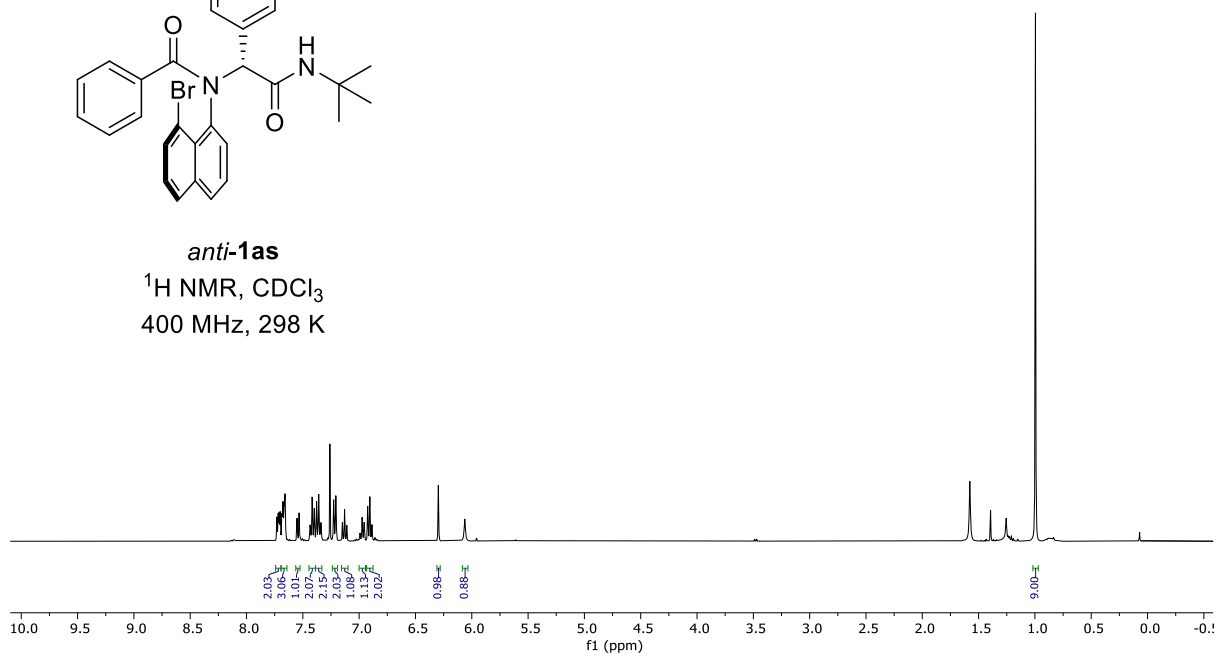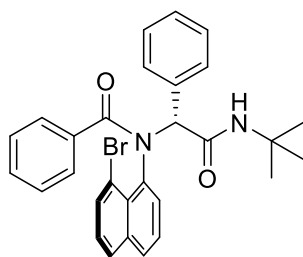

**anti-1as**

<sup>13</sup>C NMR, CDCl<sub>3</sub>

101 MHz, 298 K

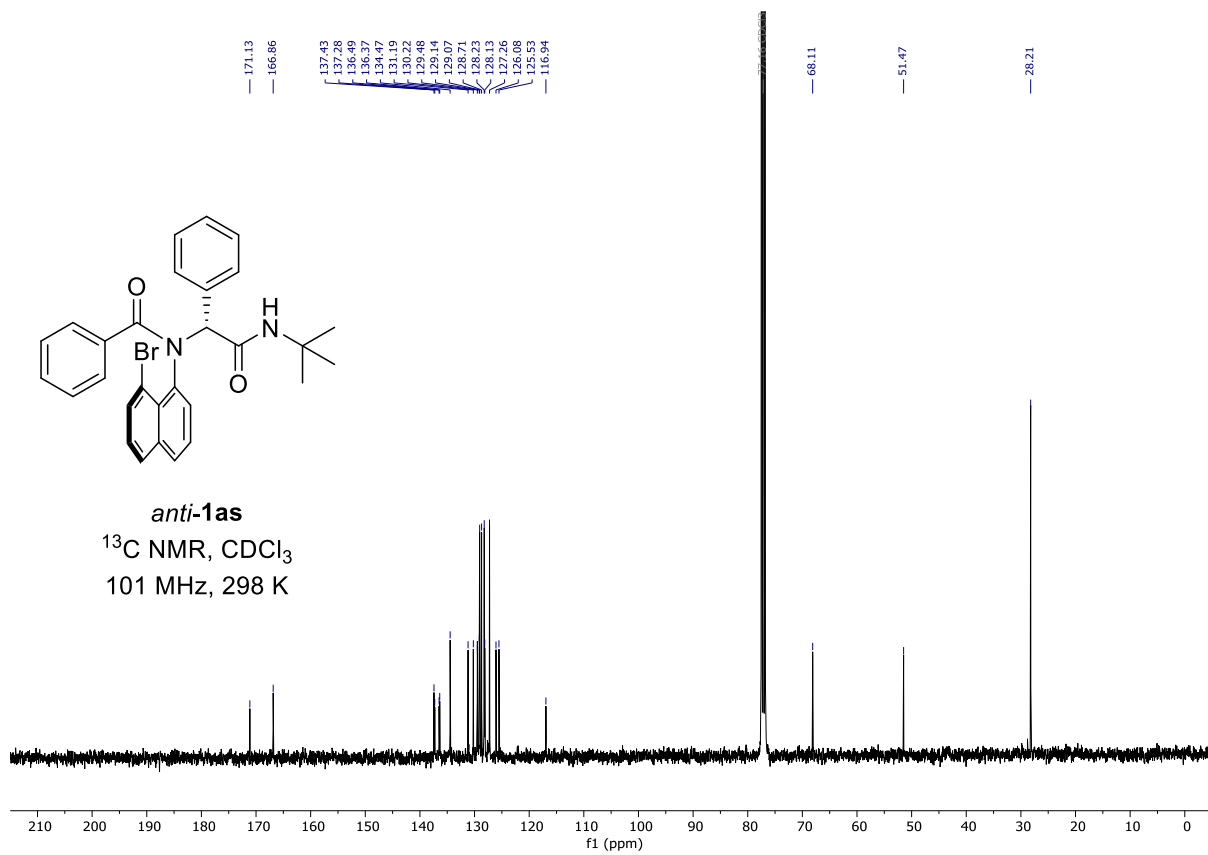

— 7.26 CDCl<sub>3</sub>

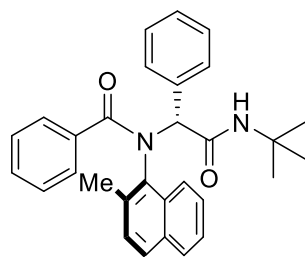

**anti-1at**  
<sup>1</sup>H NMR, CDCl<sub>3</sub>  
400 MHz, 298 K

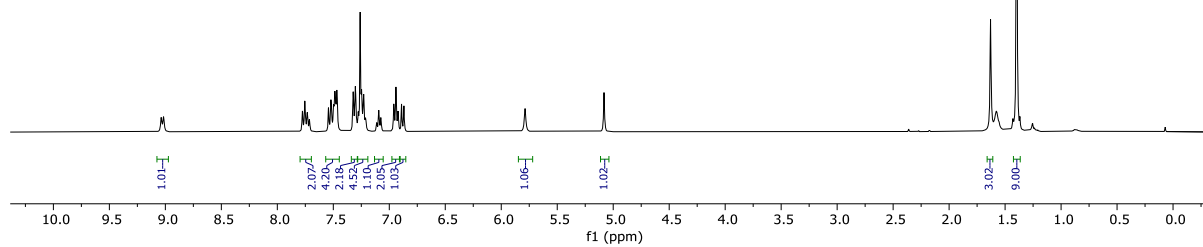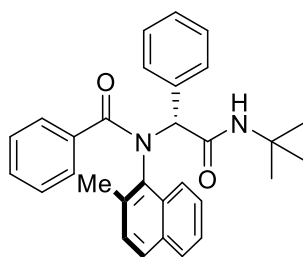

**anti-1at**  
<sup>13</sup>C NMR, CDCl<sub>3</sub>  
101 MHz, 298 K

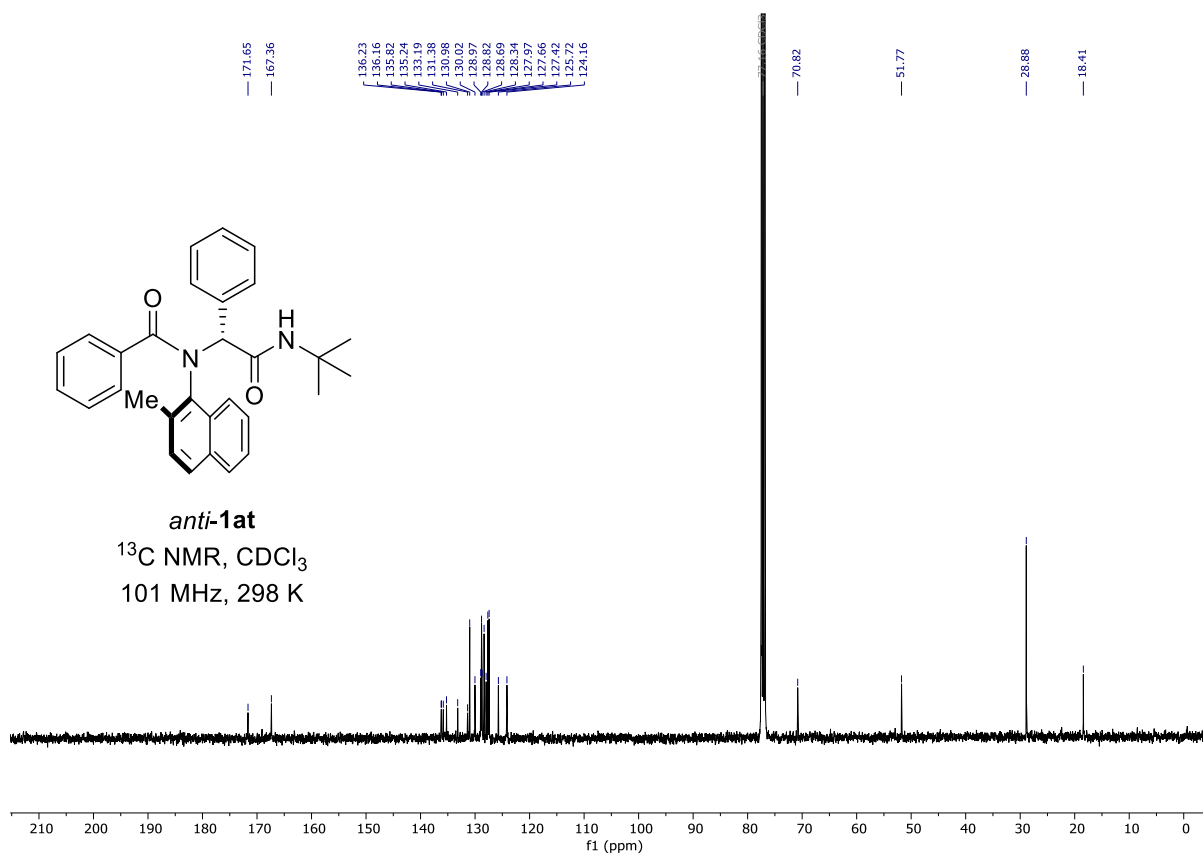

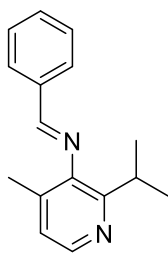

**S2**

<sup>1</sup>H NMR, CDCl<sub>3</sub>  
400 MHz, 298 K

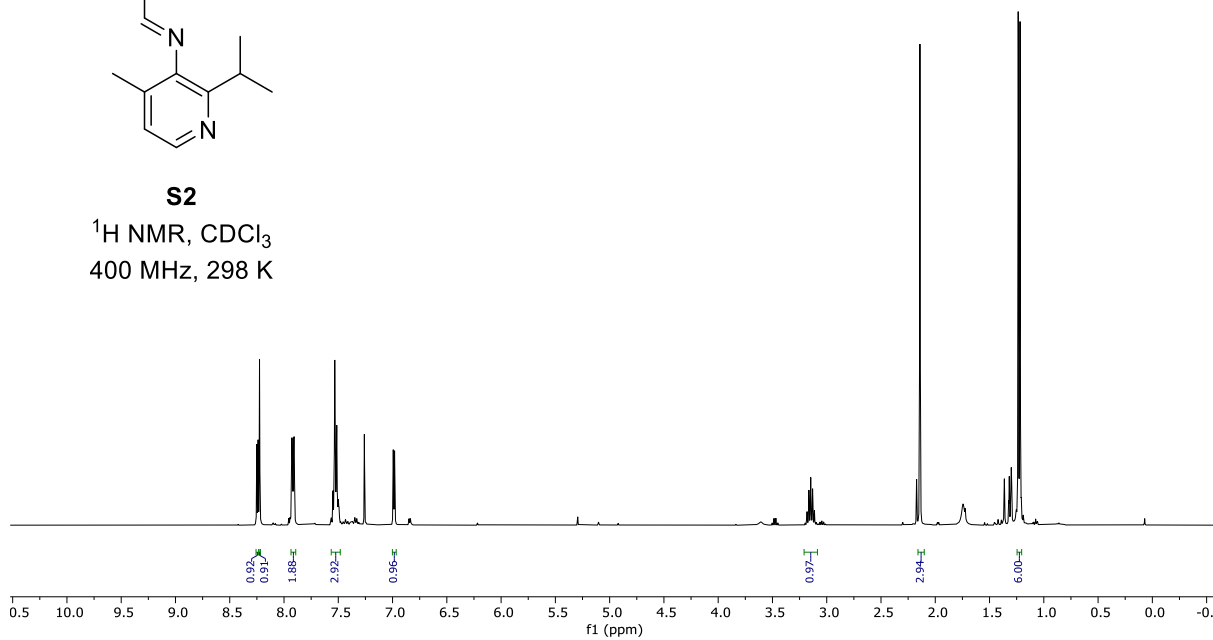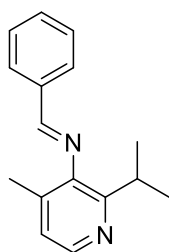

**S2**

<sup>13</sup>C NMR, CDCl<sub>3</sub>  
101 MHz, 298 K

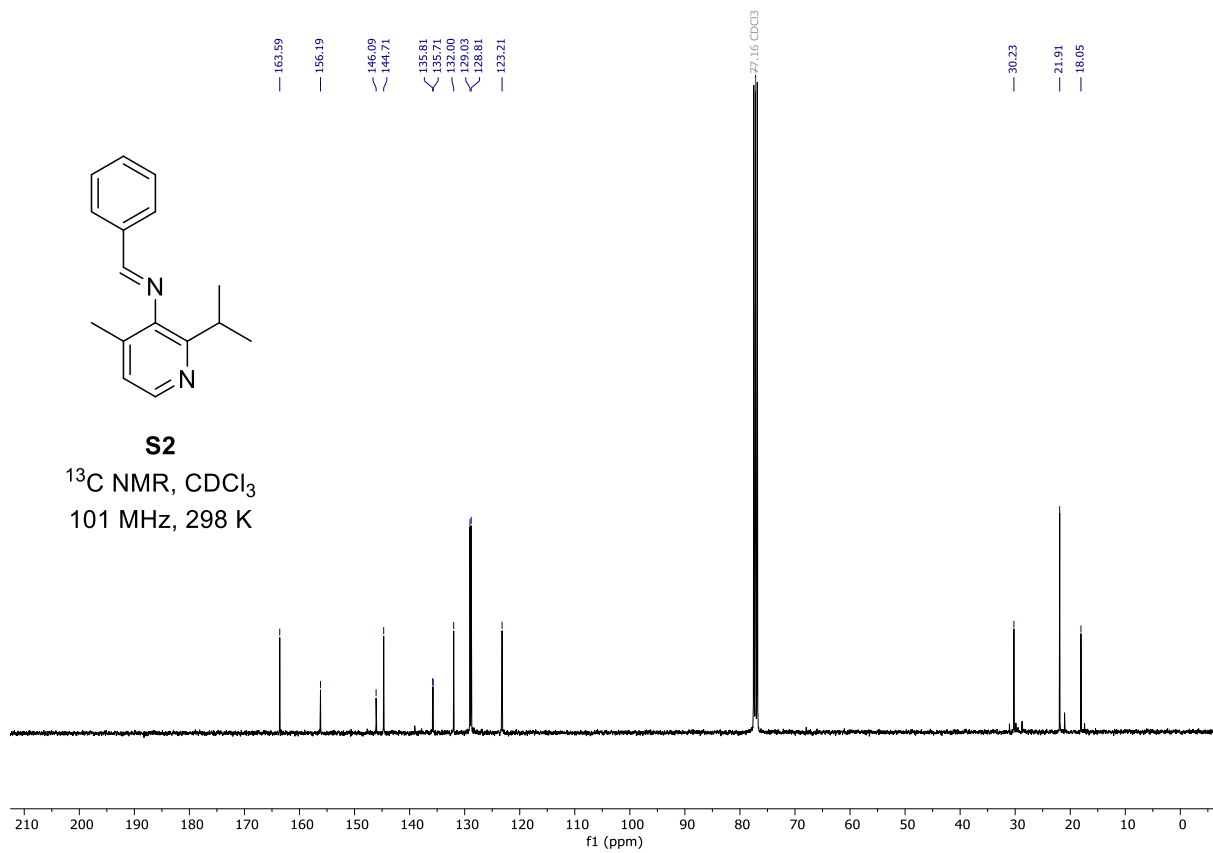

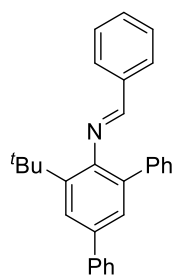

**S3**

<sup>1</sup>H NMR, CDCl<sub>3</sub>  
400 MHz, 298 K

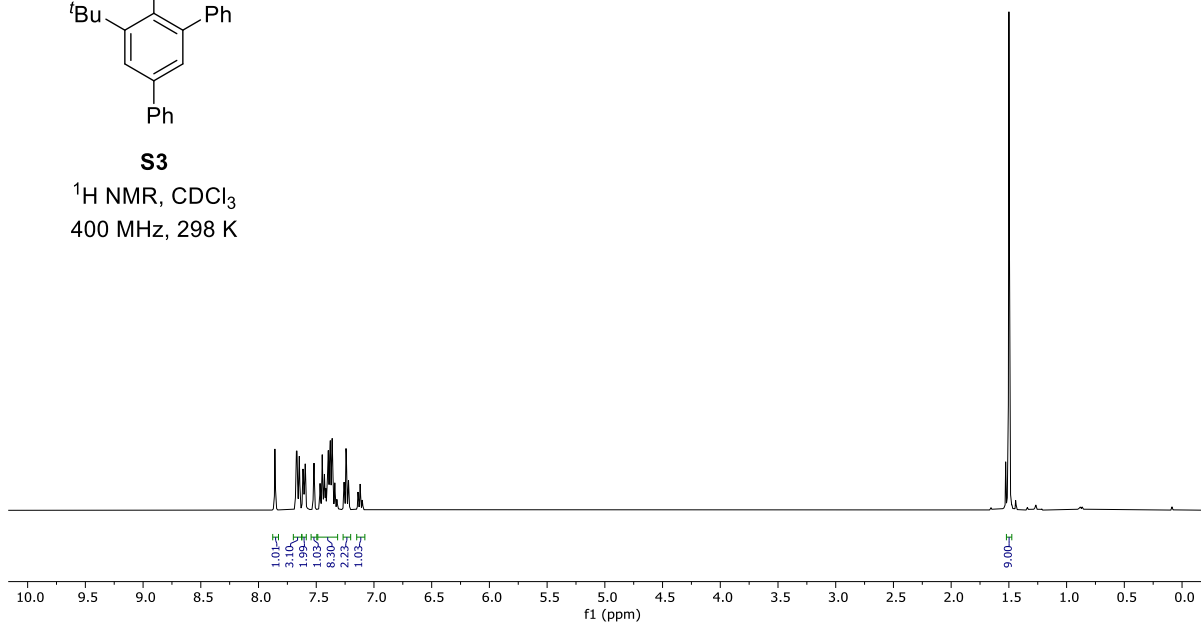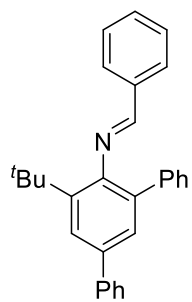

**S3**

<sup>13</sup>C NMR, CDCl<sub>3</sub>  
101 MHz, 298 K

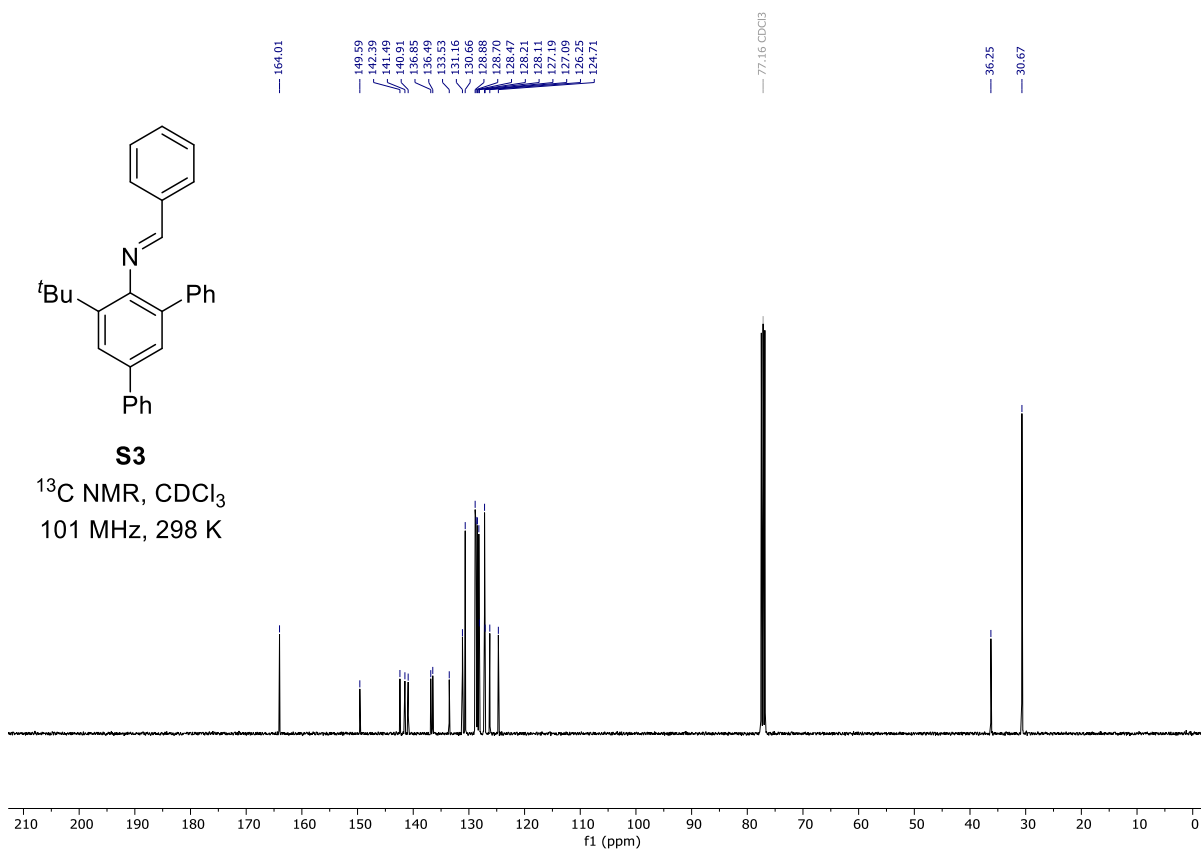

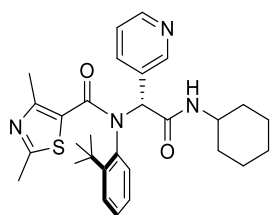

**anti-1aw**

<sup>1</sup>H NMR, CDCl<sub>3</sub>  
400 MHz, 298 K

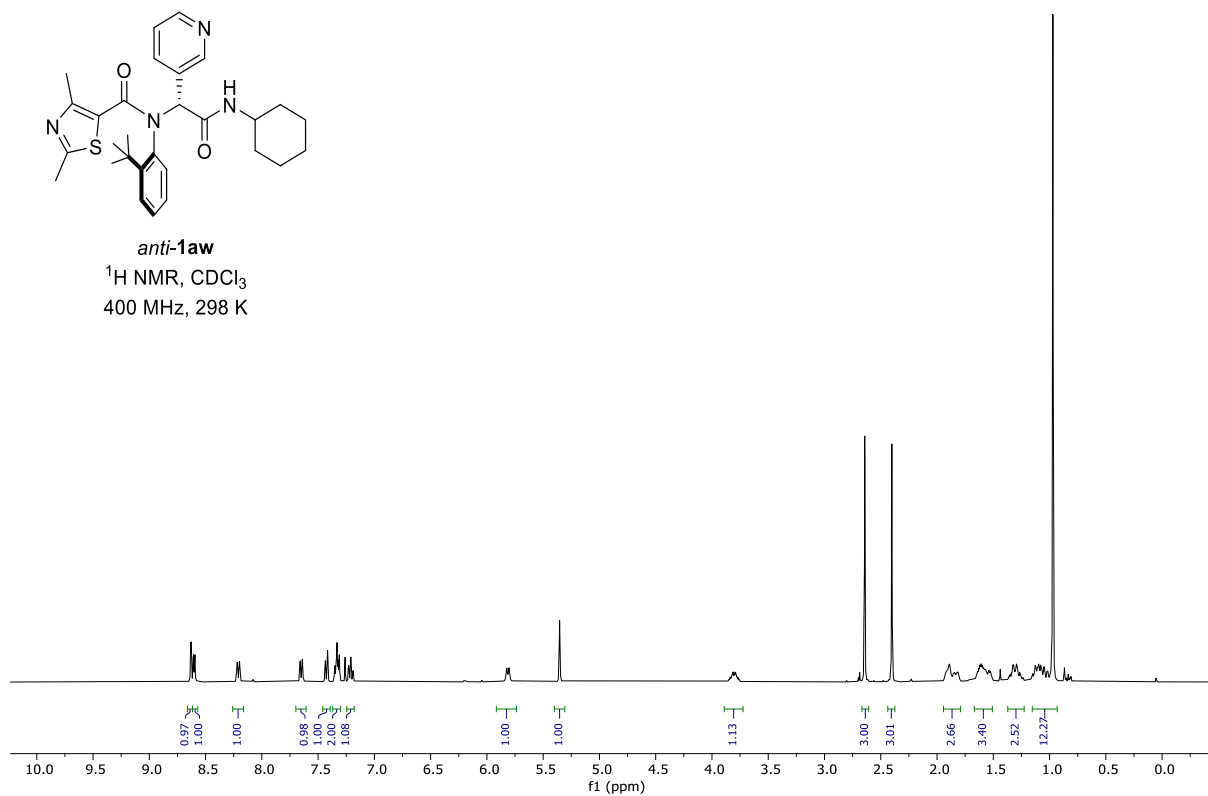

167.82  
167.17  
165.51  
160.48  
151.60  
150.27  
148.21  
140.33  
138.79  
133.21  
132.03  
129.62  
127.66  
123.82  
123.29

77.16 CDCl<sub>3</sub>

71.02

49.13

36.32

32.90

32.74

32.15

25.53

24.79

18.65

18.48

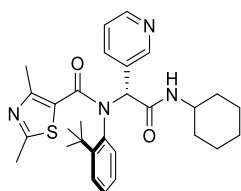

**anti-1aw**

<sup>13</sup>C NMR, CDCl<sub>3</sub>  
101 MHz, 298 K

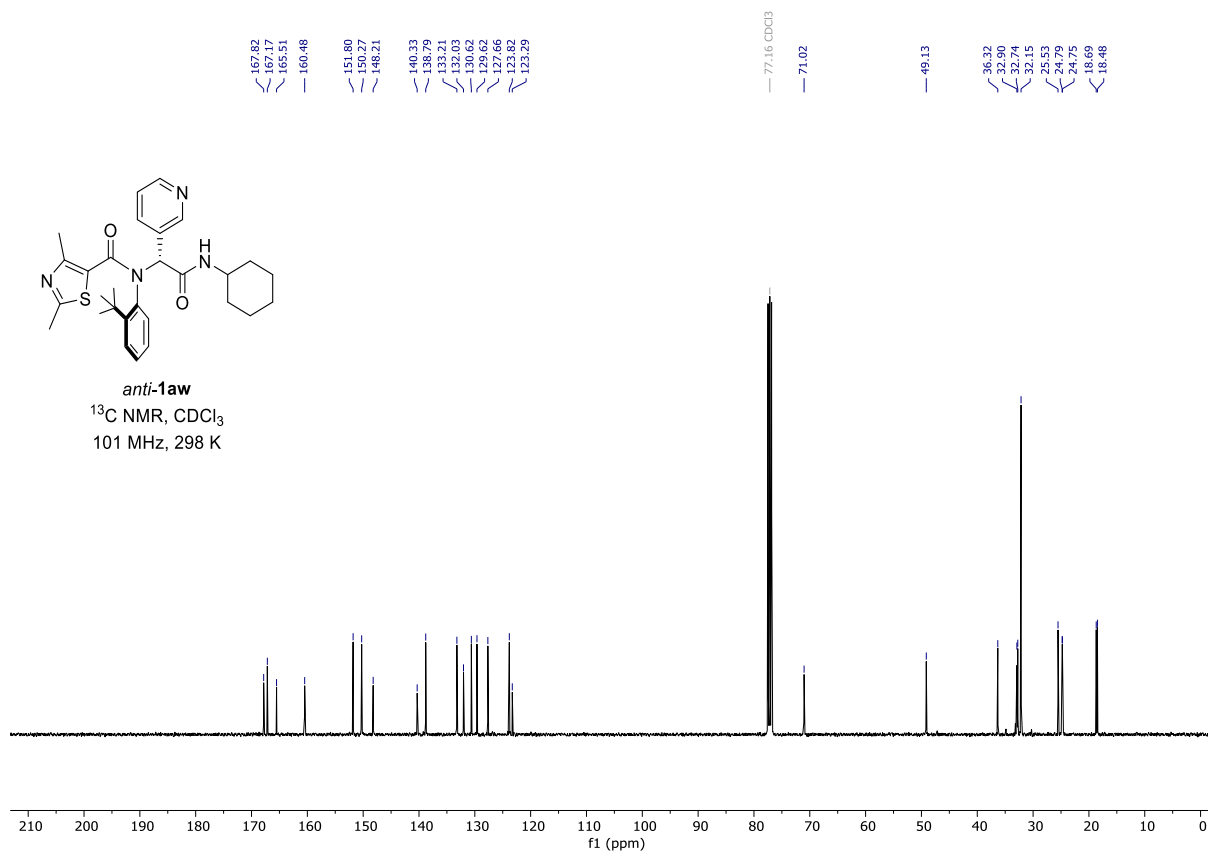



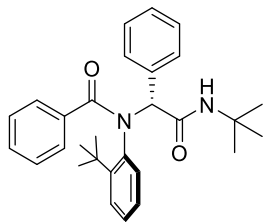

**syn-1a**  
 $^1\text{H NMR}$ ,  $\text{CDCl}_3$   
 300 MHz, 298 K

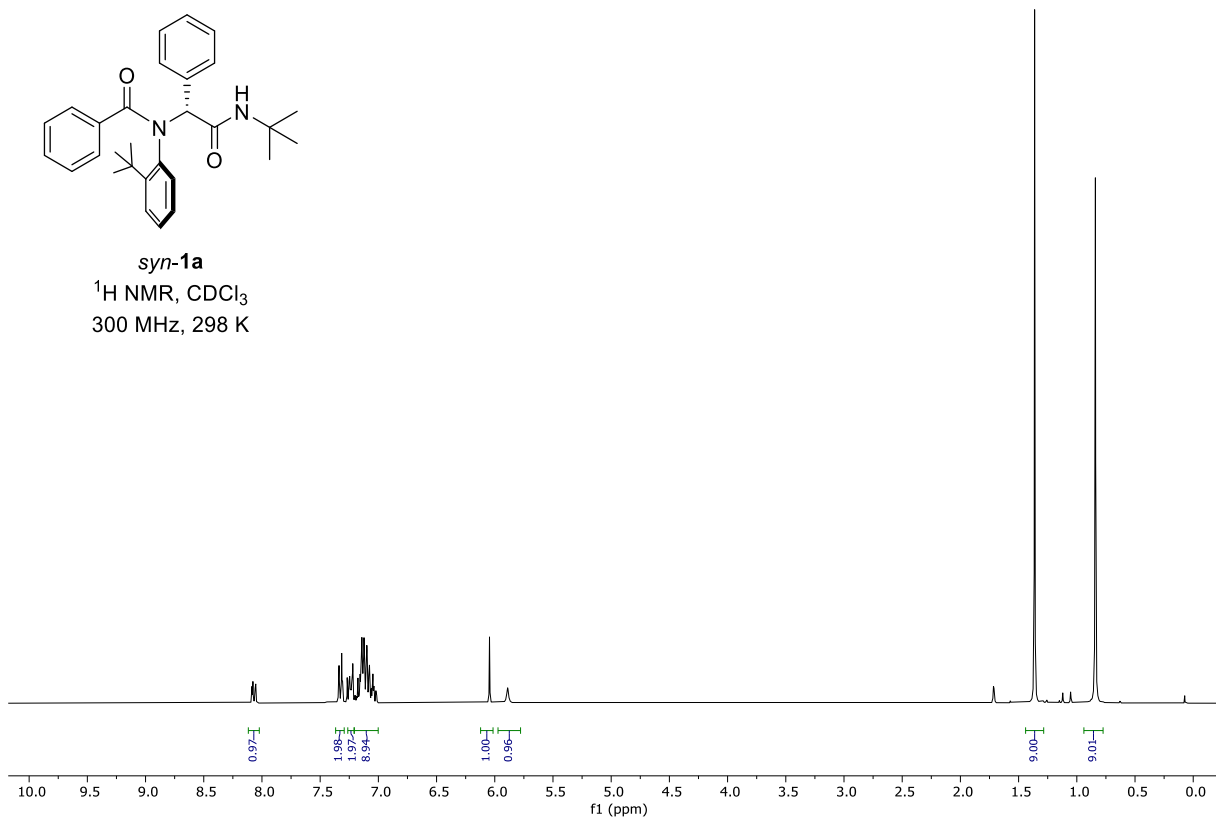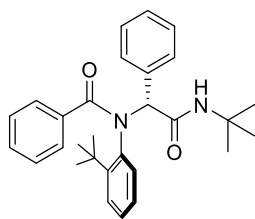

**syn-1a**  
 $^{13}\text{C NMR}$ ,  $\text{CDCl}_3$   
 75 MHz, 298 K

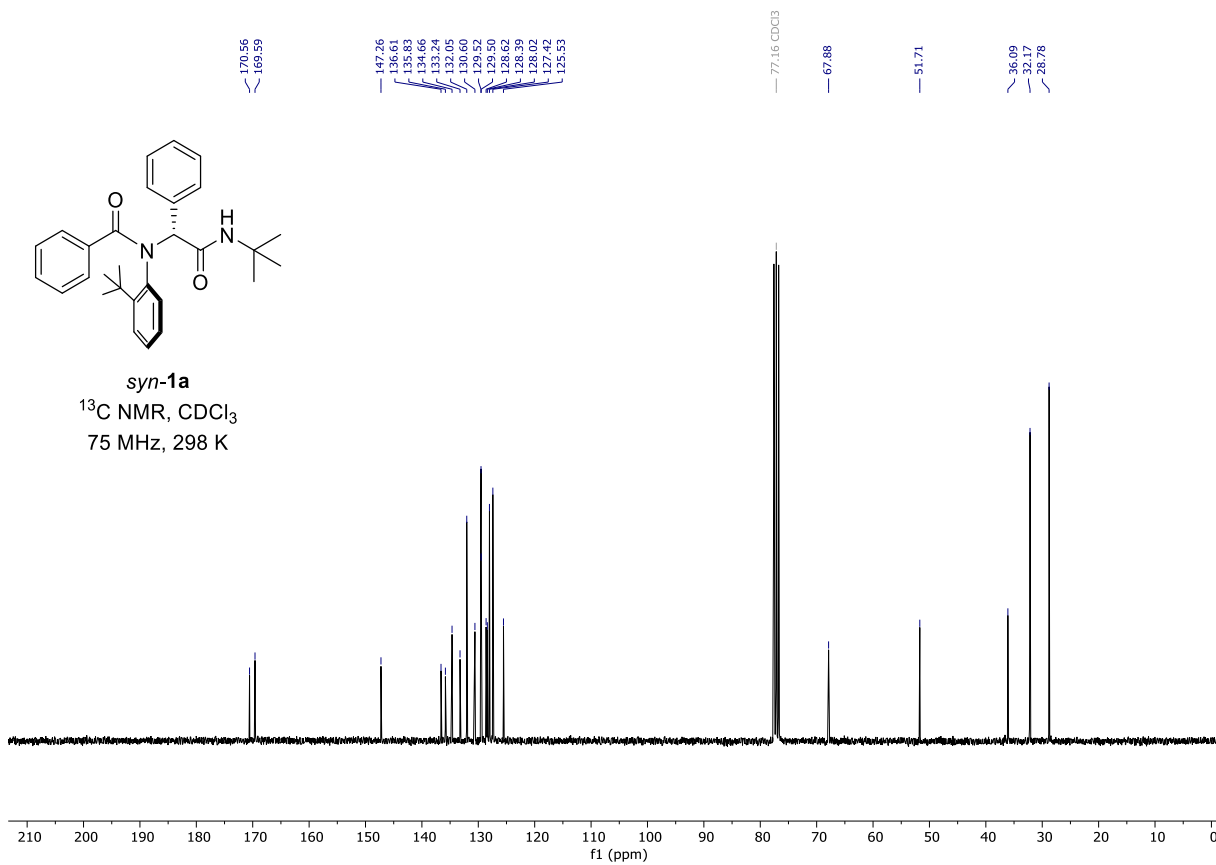

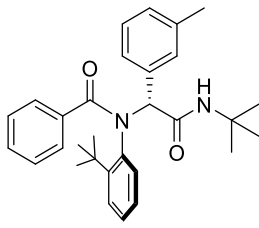

**syn-1f**  
 $^1\text{H NMR}$ ,  $\text{CDCl}_3$   
 400 MHz, 298 K

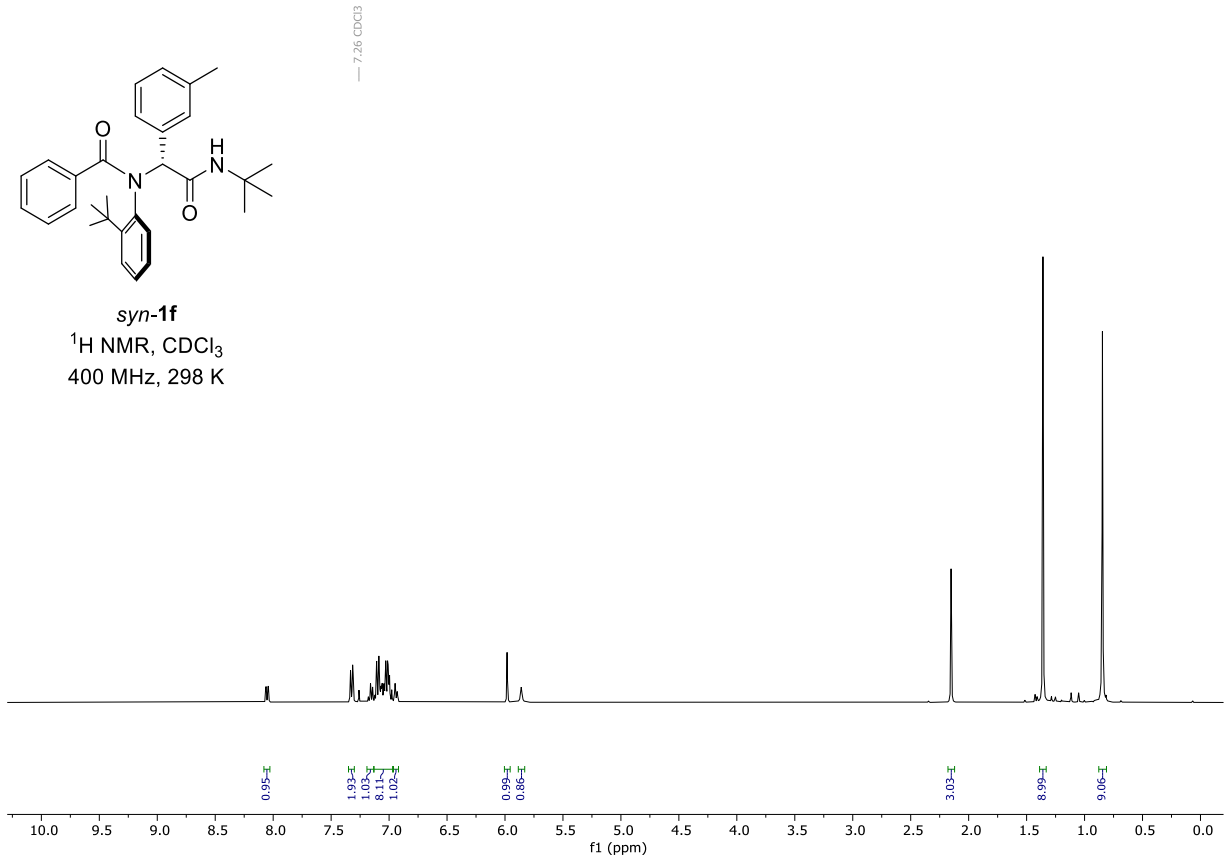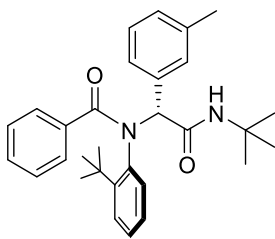

**syn-1f**  
 $^{13}\text{C NMR}$ ,  $\text{CDCl}_3$   
 101 MHz, 298 K

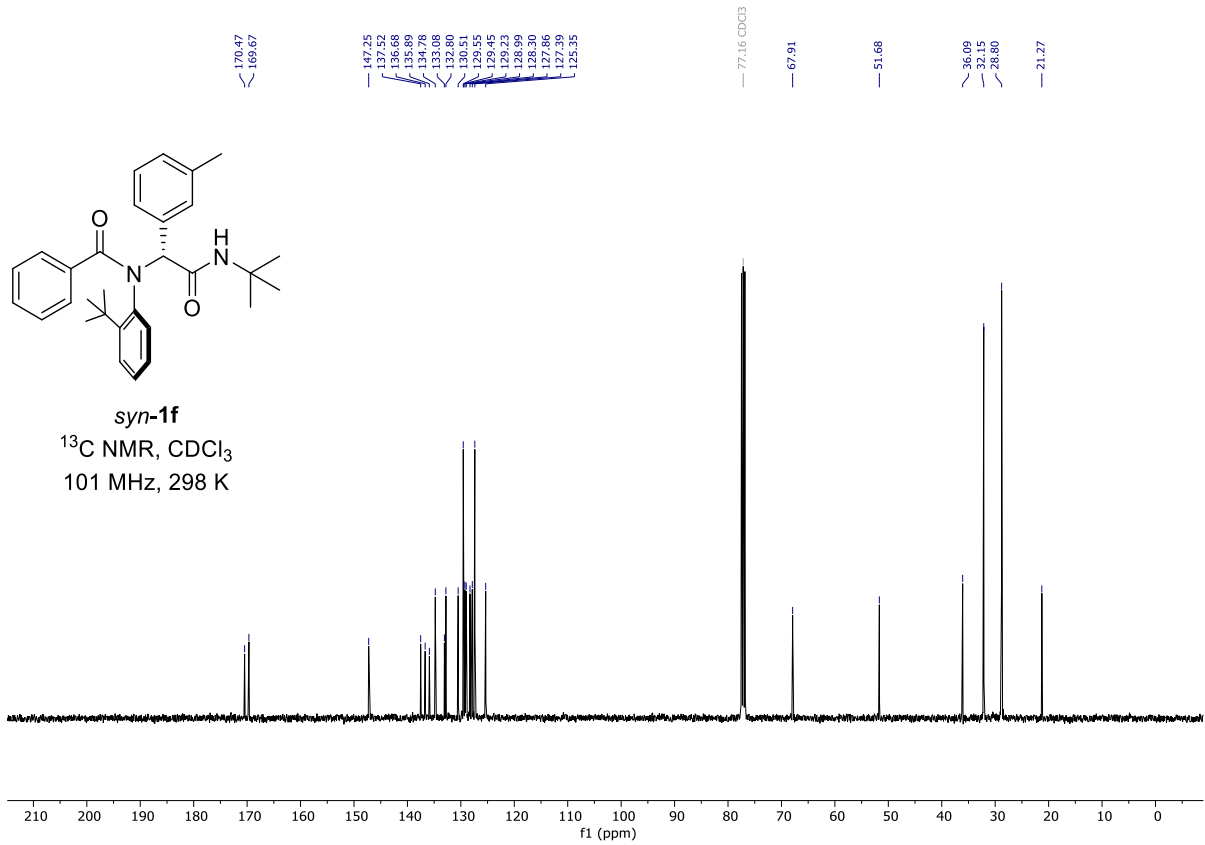

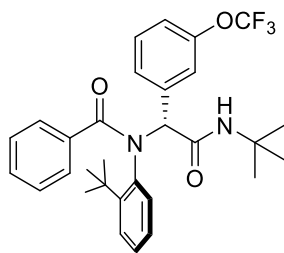

***syn-1h***  
 $^1\text{H}$  NMR,  $\text{CDCl}_3$   
 400 MHz, 298 K

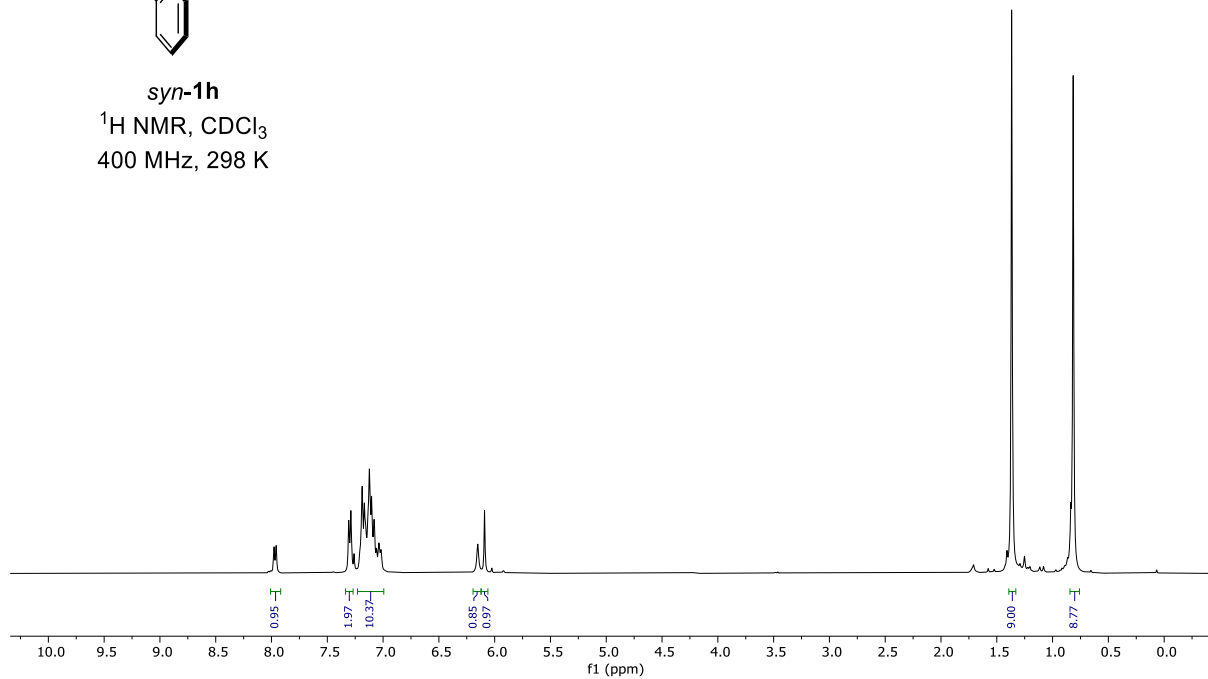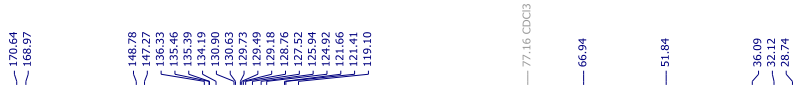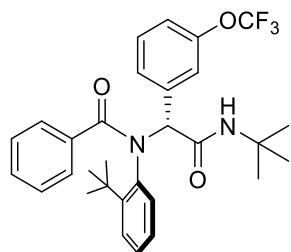

***syn-1h***  
 $^{13}\text{C}$  NMR,  $\text{CDCl}_3$   
 101 MHz, 298 K

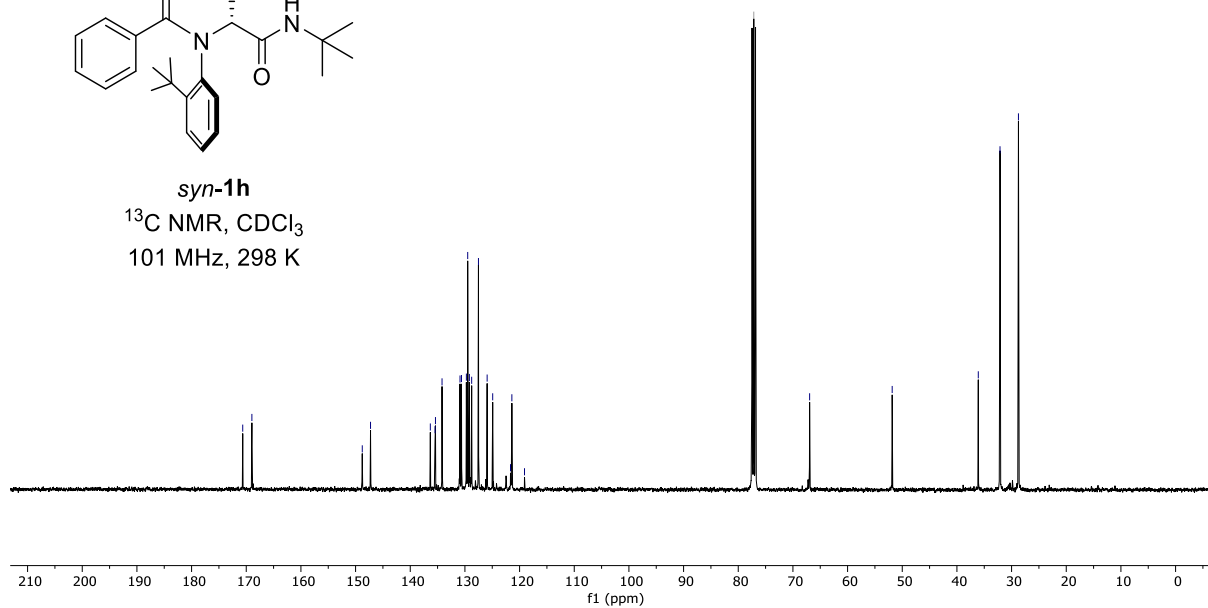

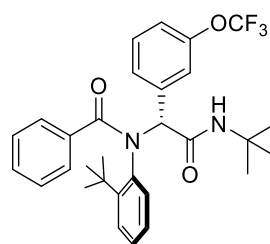

***syn-1h***  
<sup>19</sup>F NMR, CDCl<sub>3</sub>  
376 MHz, 298 K

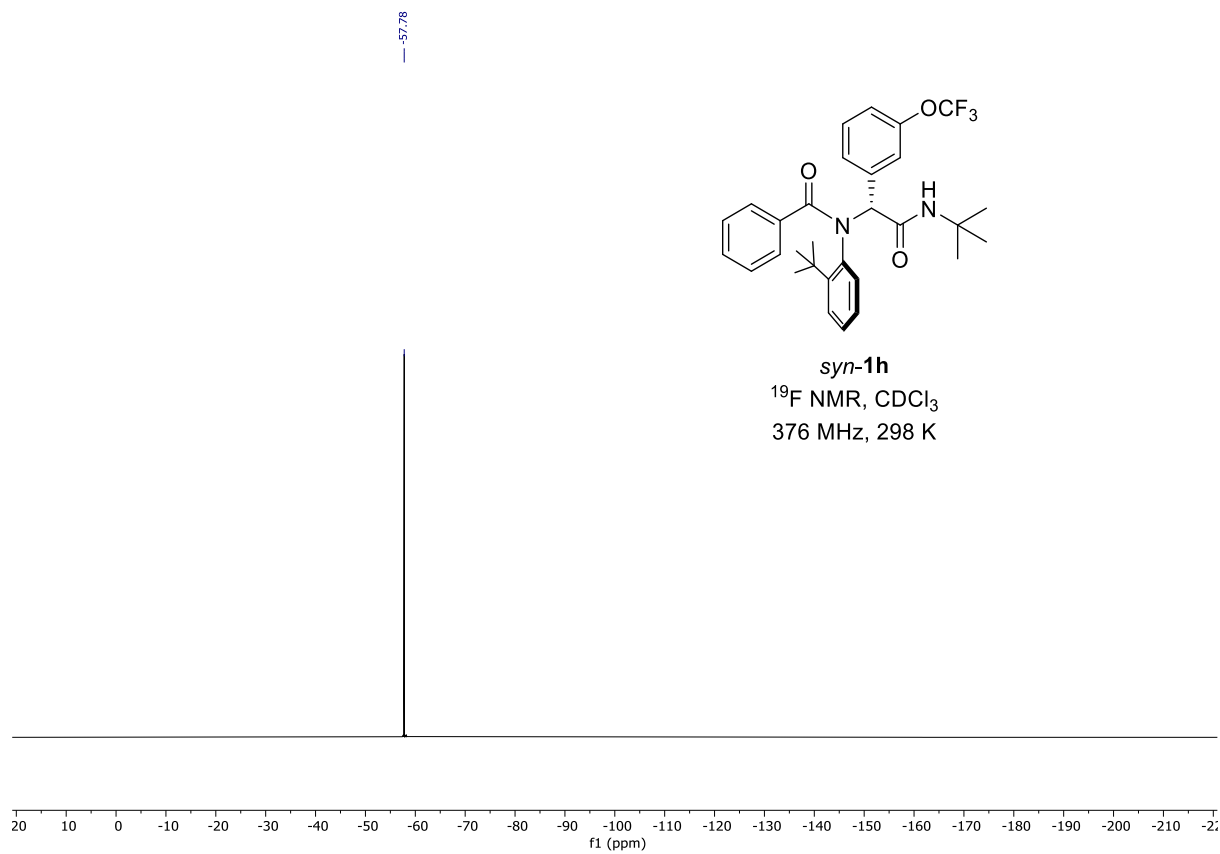

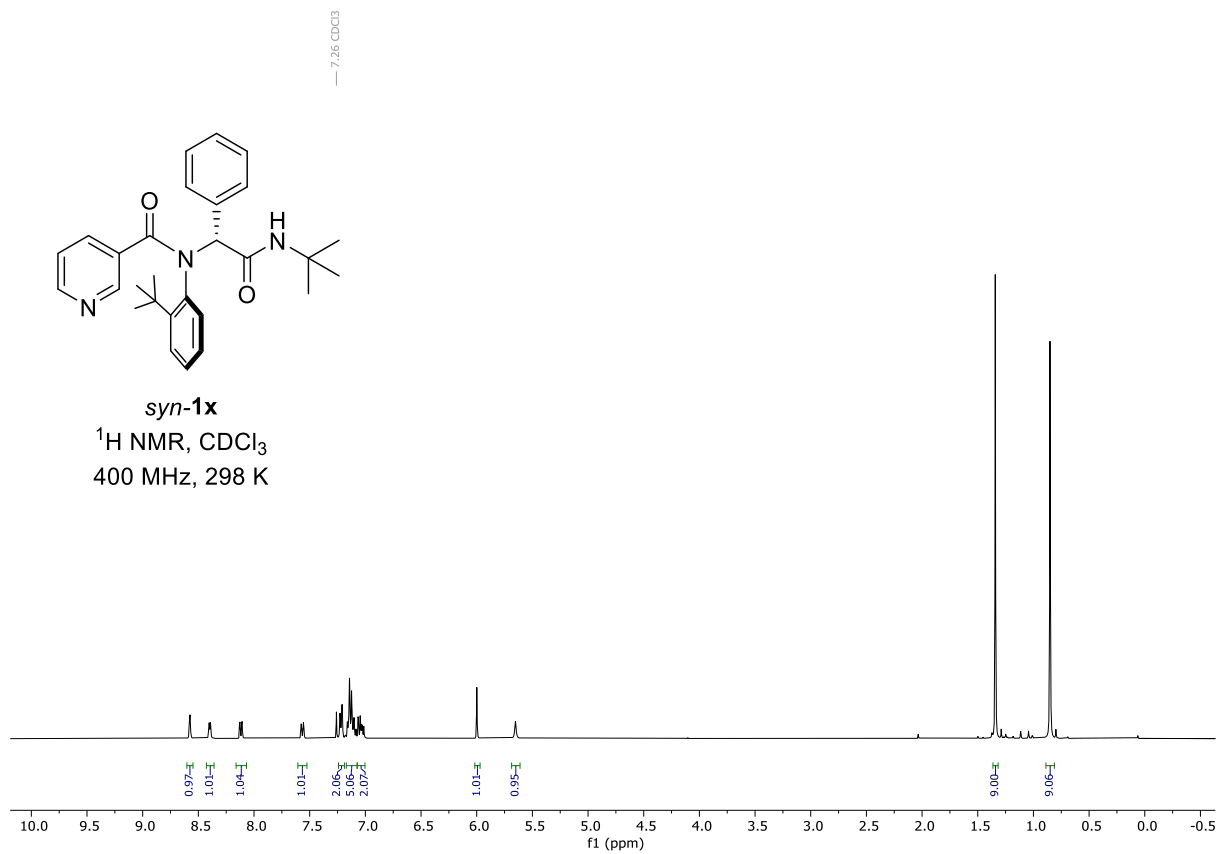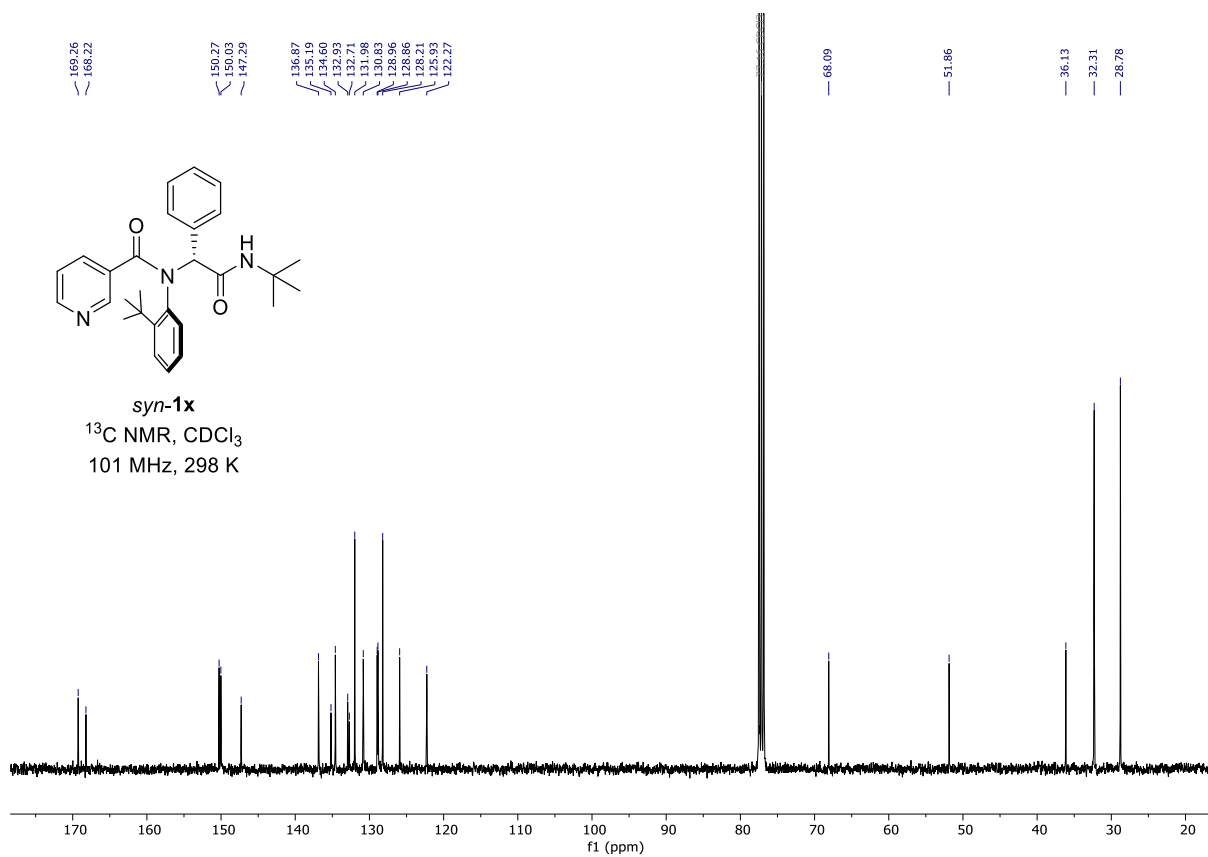

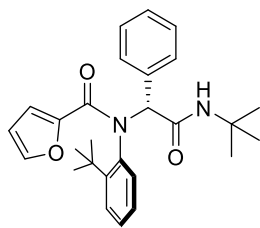

**syn-1y**  
 $^1\text{H}$  NMR,  $\text{CDCl}_3$   
 400 MHz, 298 K

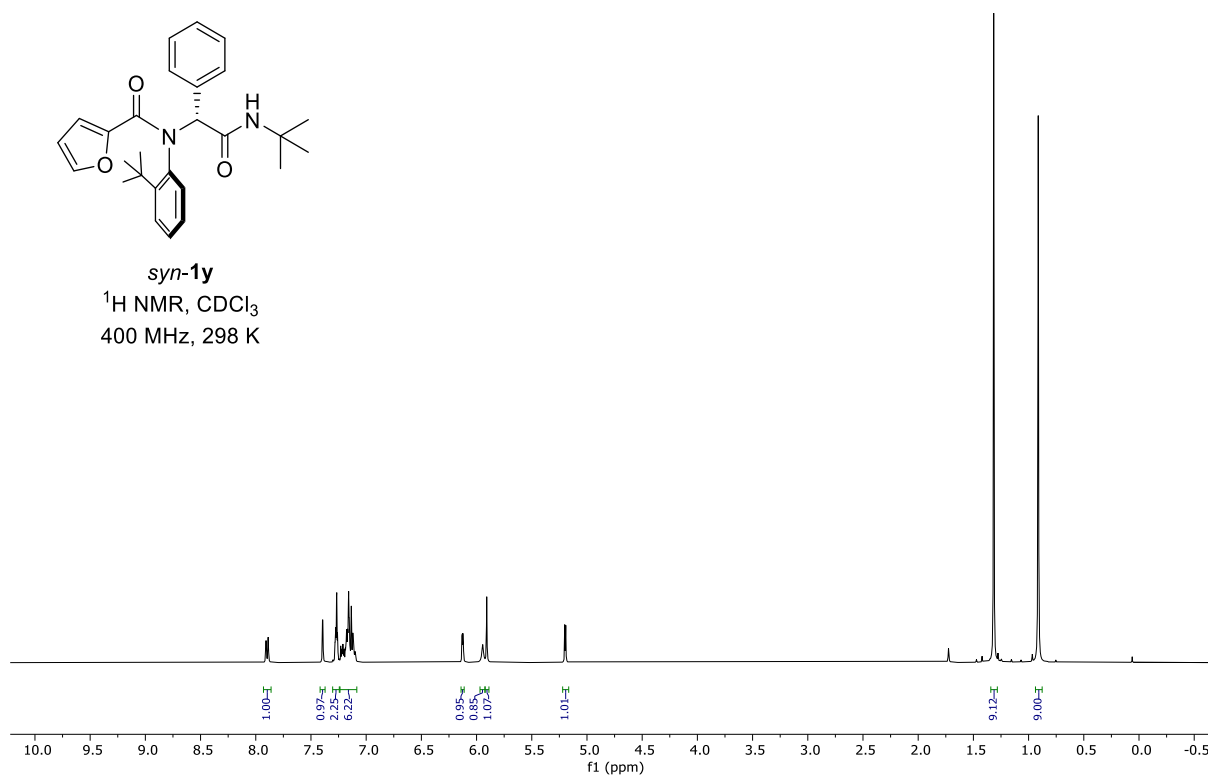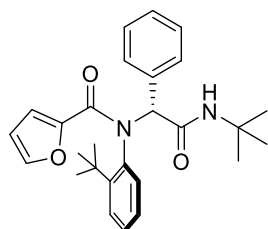

**syn-1y**  
 $^{13}\text{C}$  NMR,  $\text{CDCl}_3$   
 101 MHz, 298 K

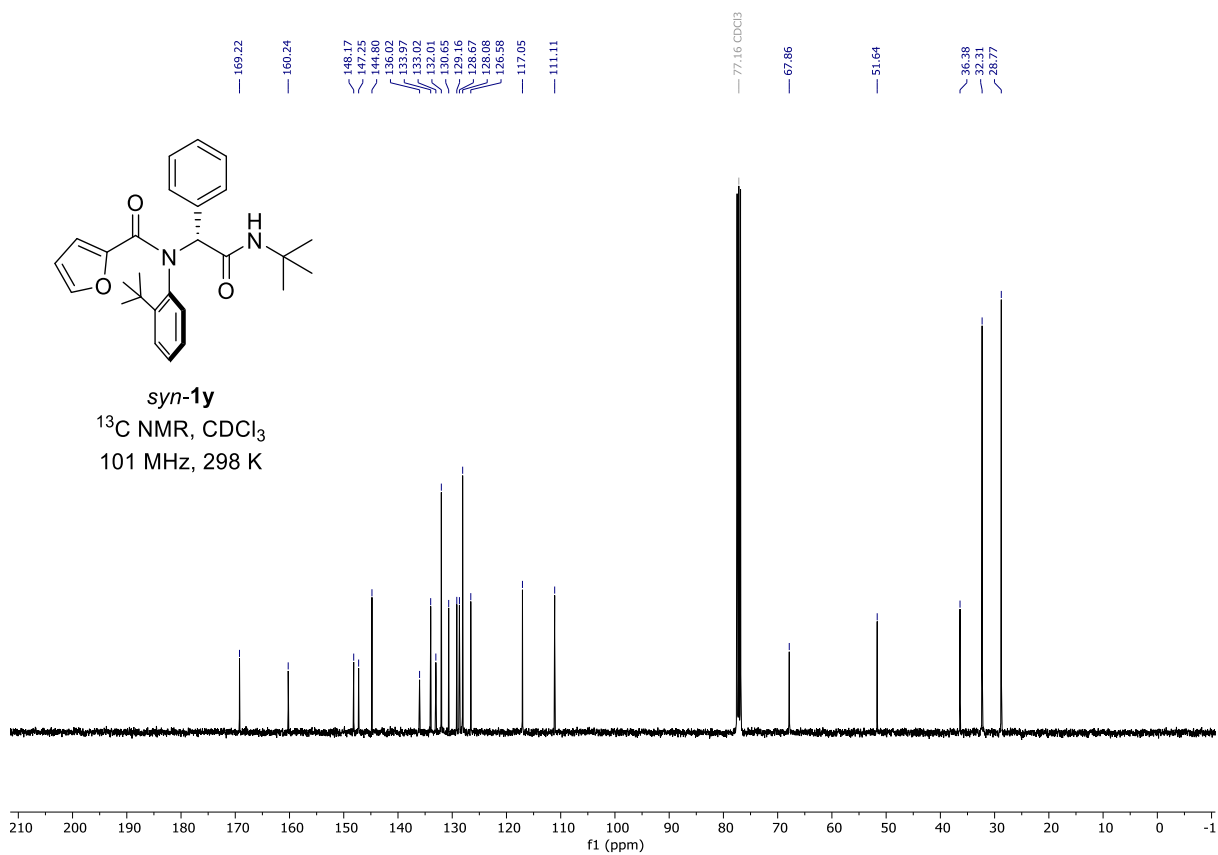

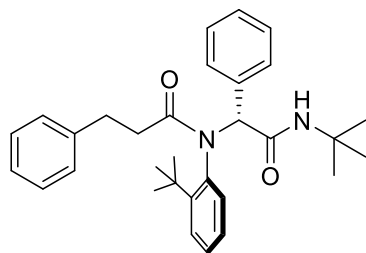

**syn-1z**  
 $^1\text{H NMR}$ ,  $\text{CDCl}_3$   
 400 MHz, 298 K

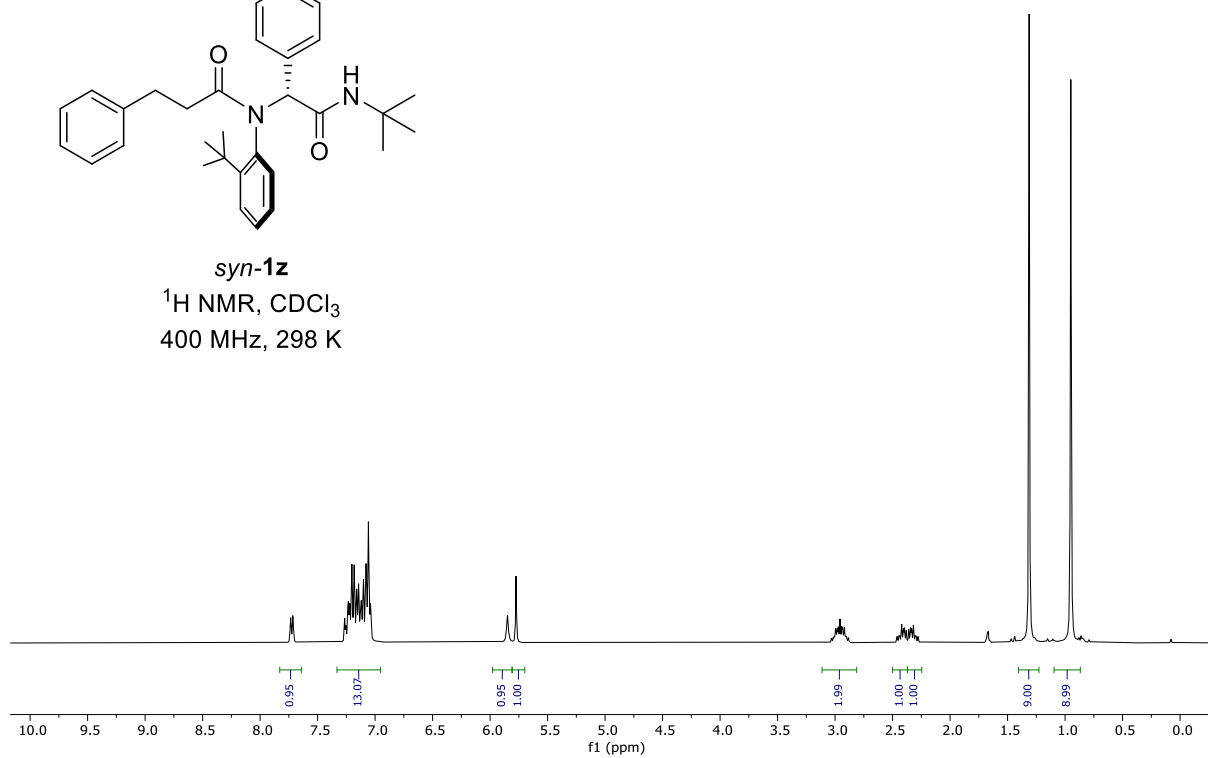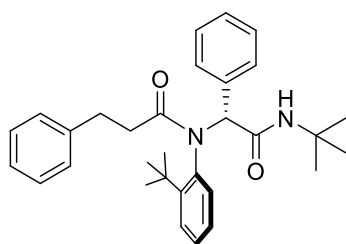

**syn-1z**  
 $^{13}\text{C NMR}$ ,  $\text{CDCl}_3$   
 101 MHz, 298 K

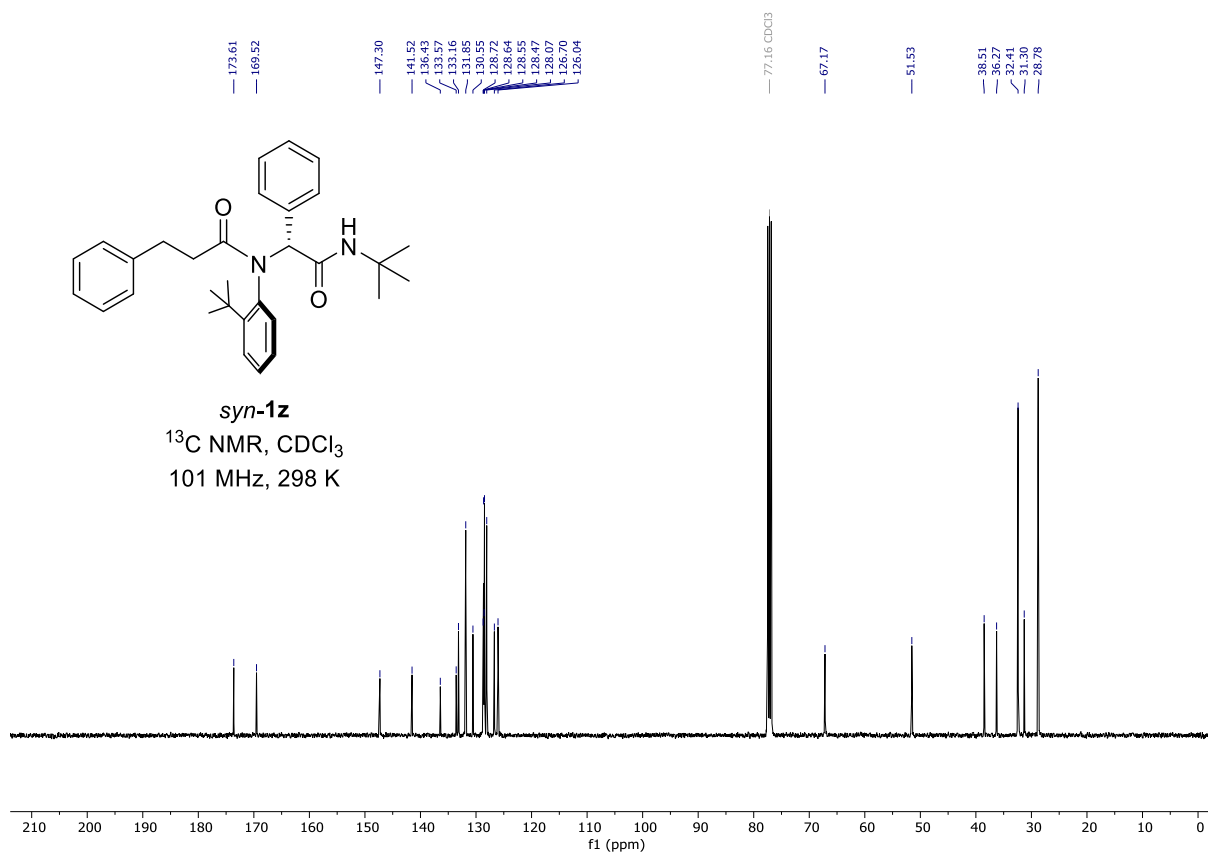

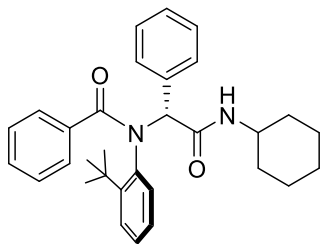

**syn-1ai**  
 $^1\text{H}$  NMR,  $\text{CDCl}_3$   
 400 MHz, 298 K

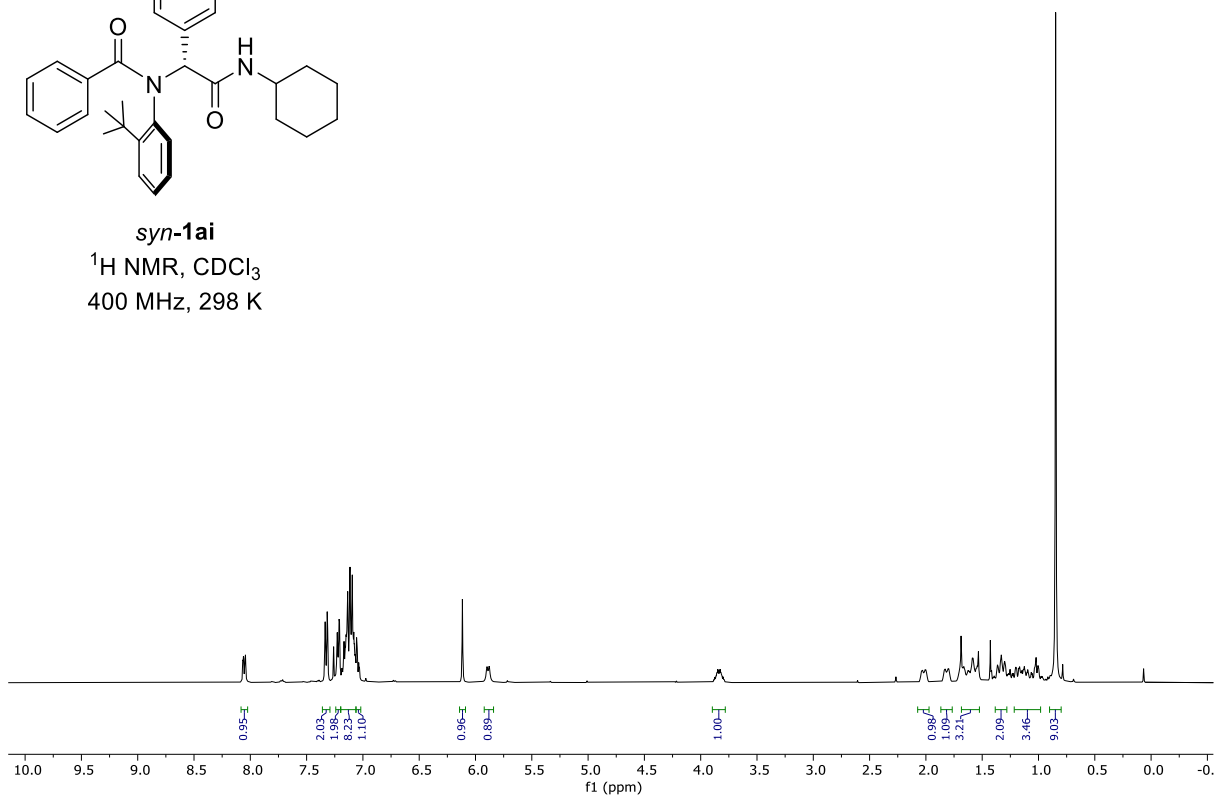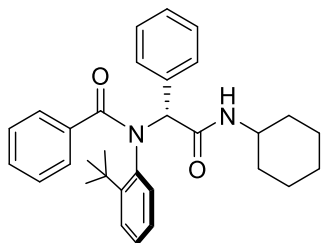

**syn-1ai**  
 $^{13}\text{C}$  NMR,  $\text{CDCl}_3$   
 101 MHz, 298 K

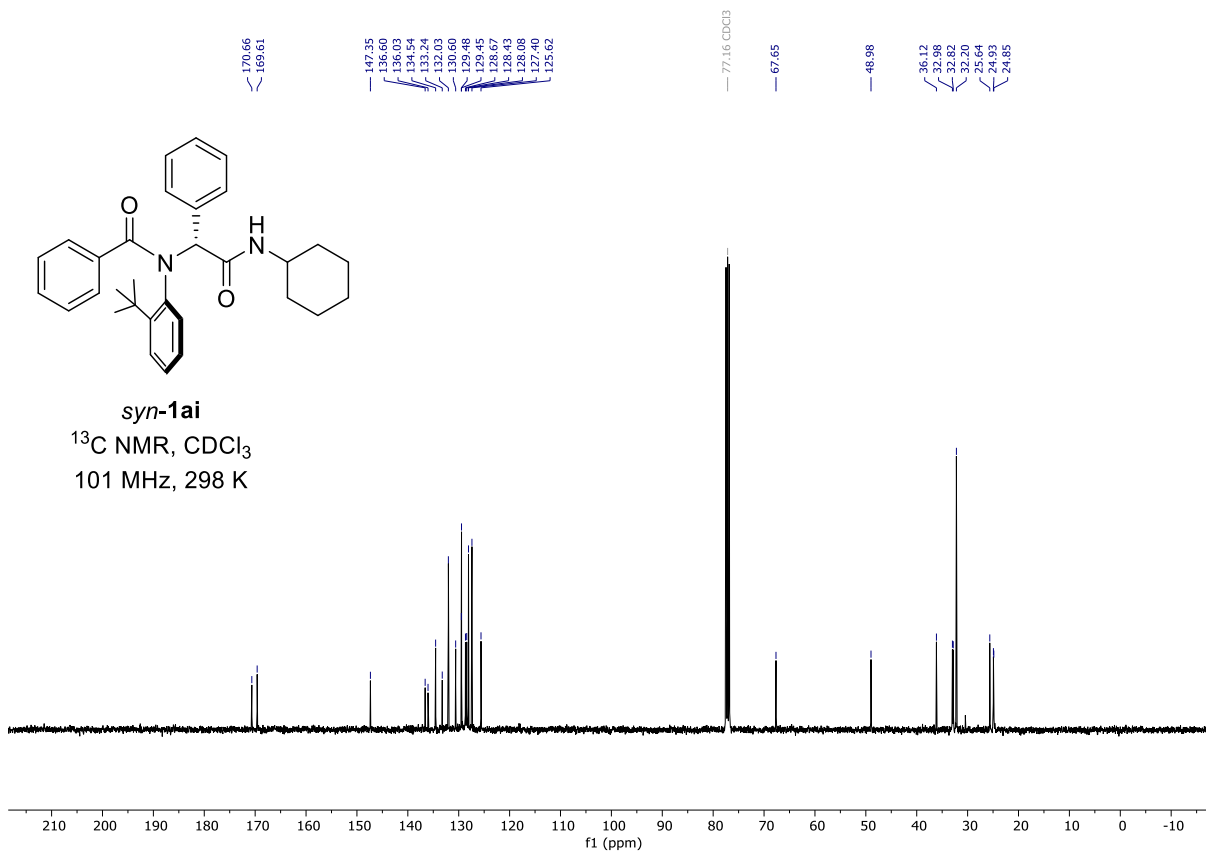



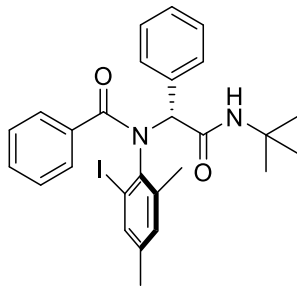

**syn-1am**  
 $^1\text{H}$  NMR,  $\text{CDCl}_3$   
 400 MHz, 298 K

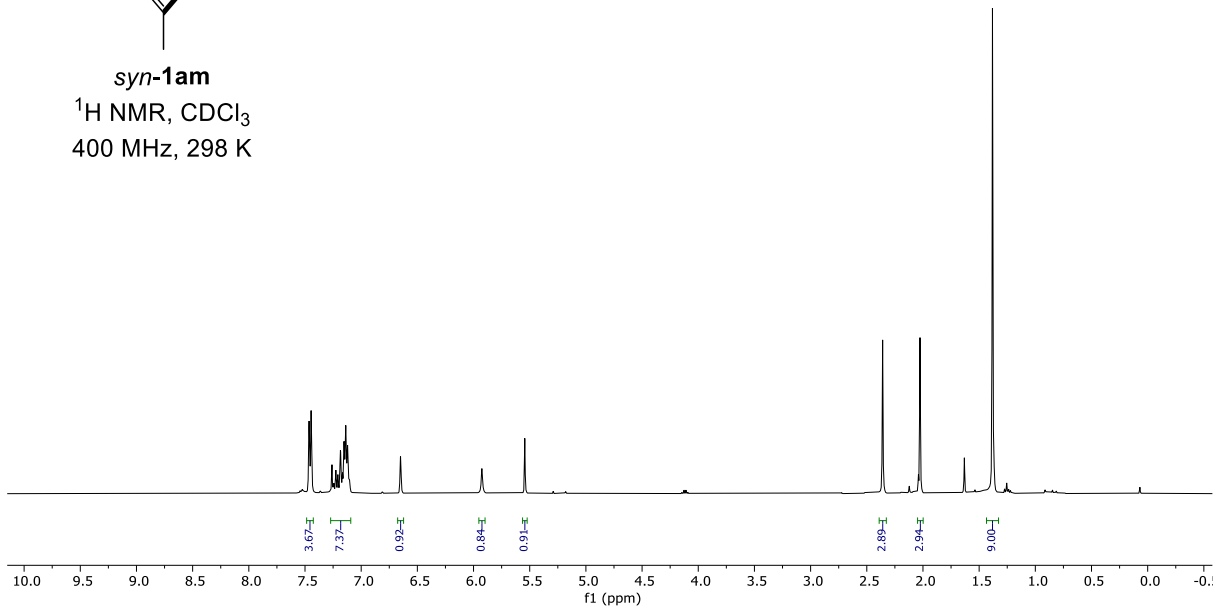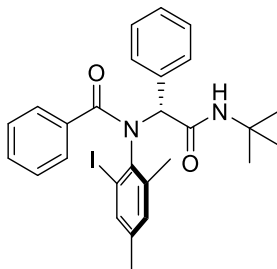

**syn-1am**  
 $^{13}\text{C}$  NMR,  $\text{CDCl}_3$   
 101 MHz, 298 K

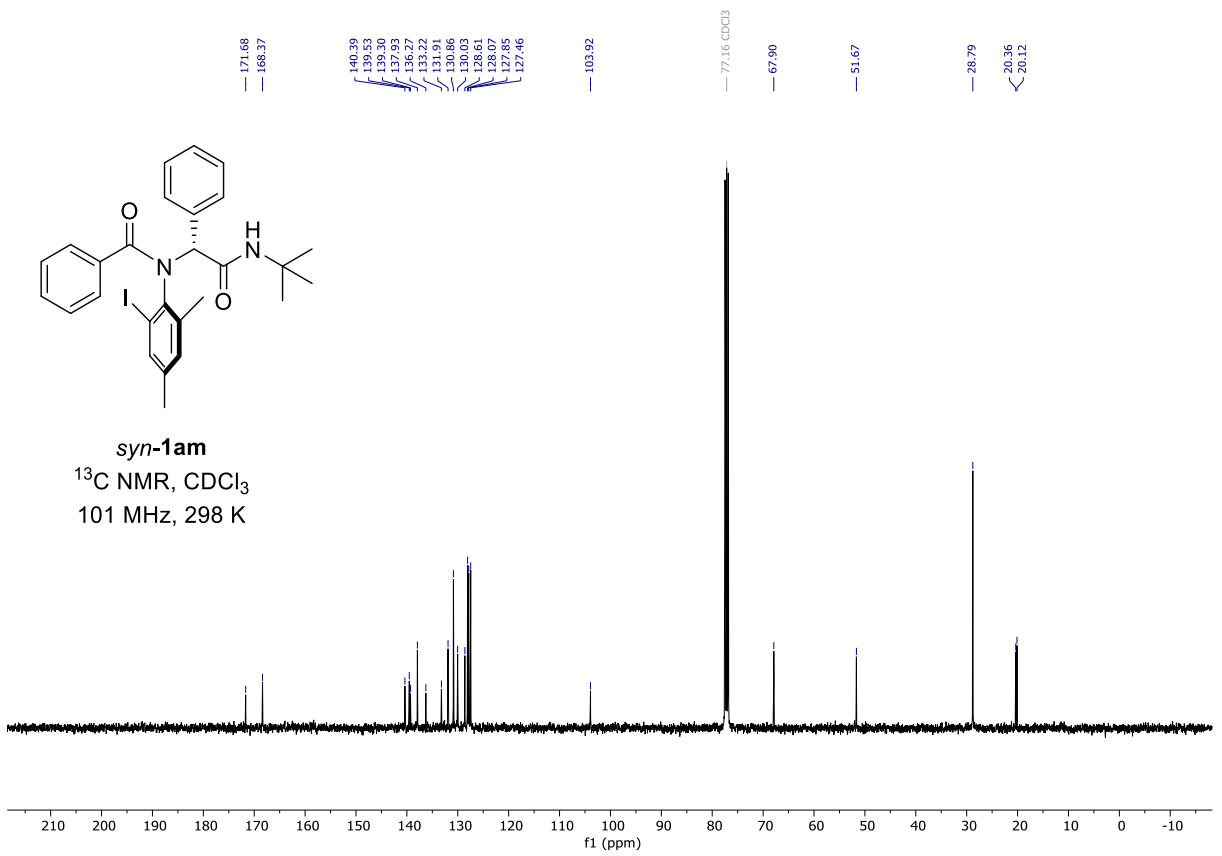

7.26 CDCl<sub>3</sub>

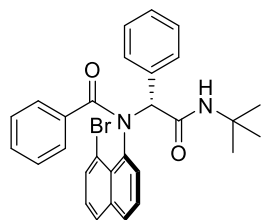

**syn-1as**  
<sup>1</sup>H NMR, CDCl<sub>3</sub>  
400 MHz, 298 K

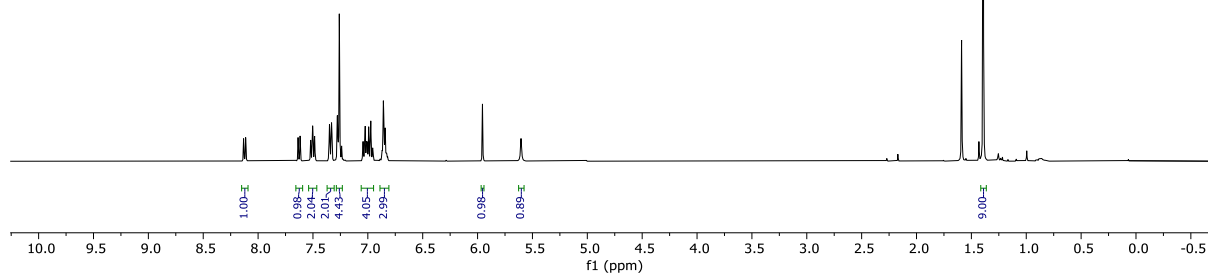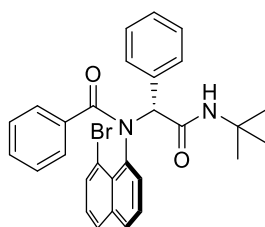

**syn-1as**  
<sup>13</sup>C NMR, CDCl<sub>3</sub>  
101 MHz, 298 K

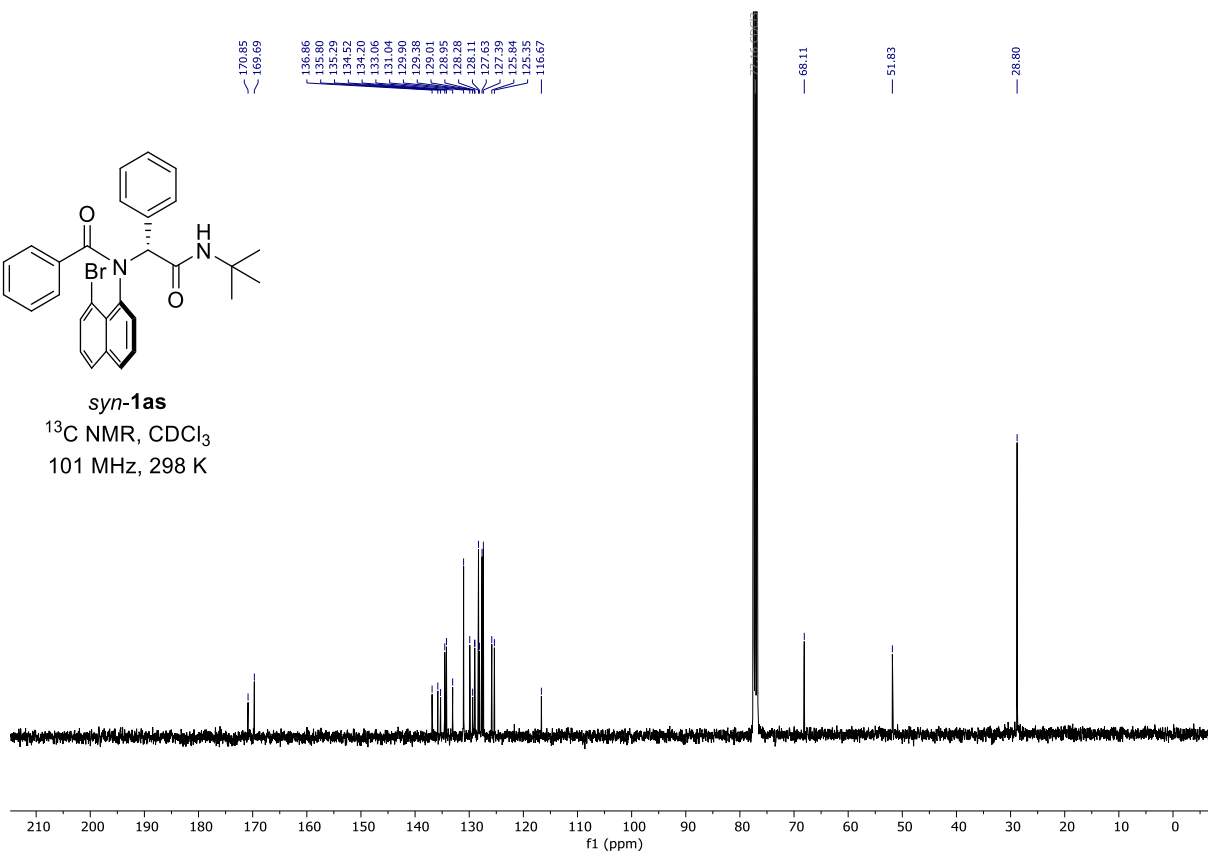

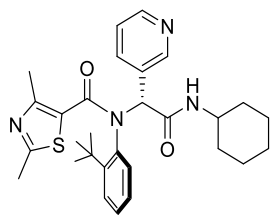

**syn-1aw**  
<sup>1</sup>H NMR, CDCl<sub>3</sub>  
 400 MHz, 298 K

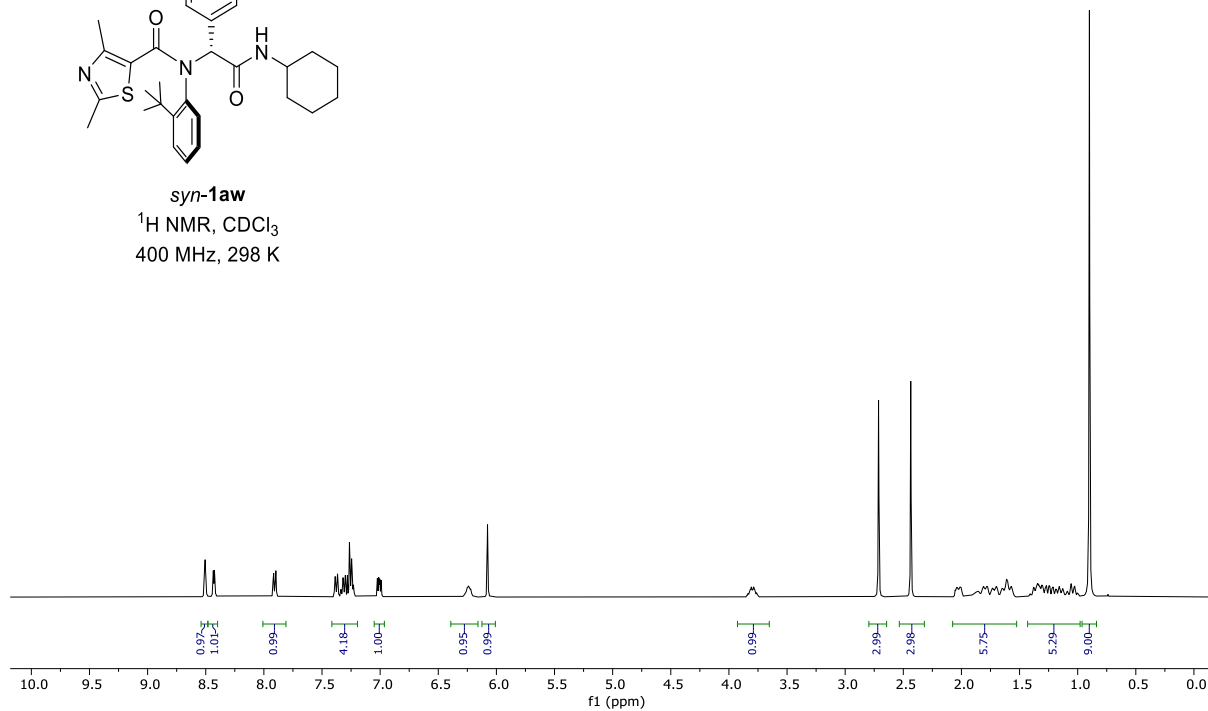

168.66  
 167.80  
 164.50  
 160.42  
 152.78  
 150.01  
 148.81  
 139.31  
 135.01  
 134.52  
 131.27  
 130.16  
 129.35  
 126.87  
 122.93  
 122.69

77.16 CDCl<sub>3</sub>

64.57

49.15

36.32

32.86

32.76

32.18

29.58

24.80

18.72

18.69

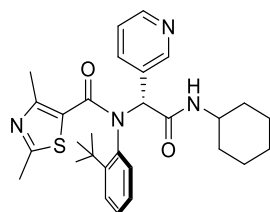

**syn-1aw**  
<sup>13</sup>C NMR, CDCl<sub>3</sub>  
 101 MHz, 298 K

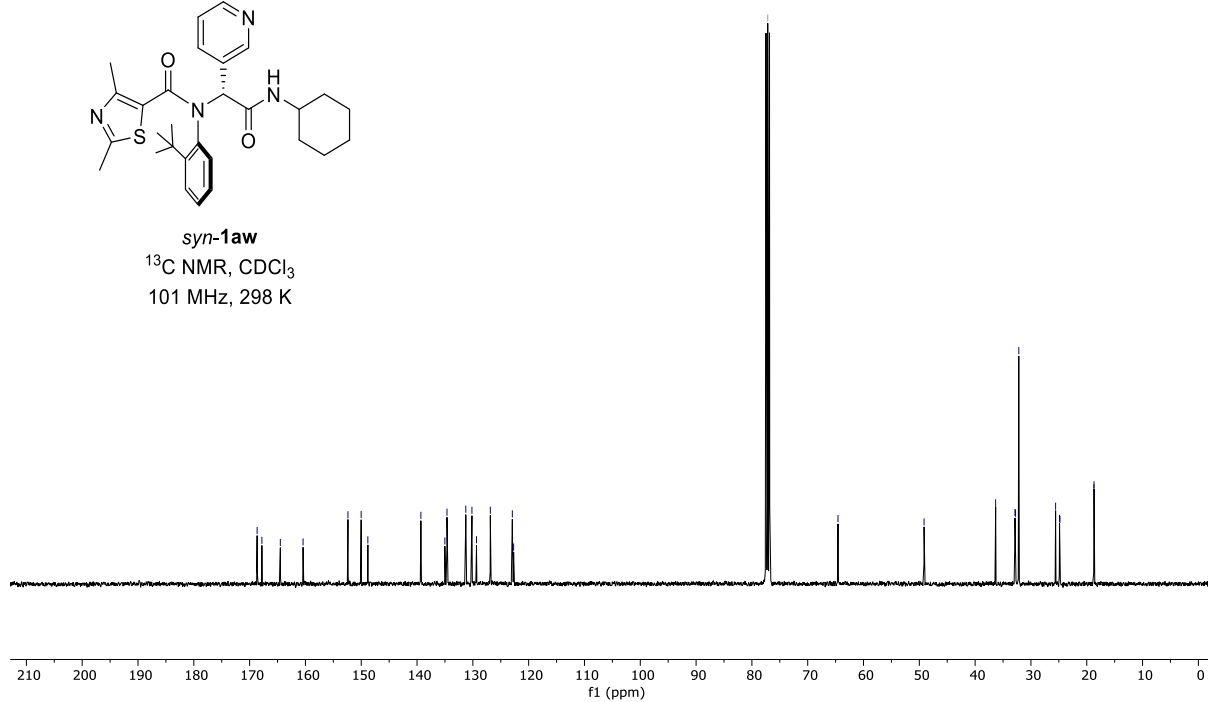

Supplement: d4sc04700a2.pdf [file d4sc04700a2.pdf]
